# Supplementary material for: RiboTag Analysis of Actively Translated mRNAs in Sertoli and Leydig Cells In Vivo
Source: PLoS One. 2013 Jun 11;8(6):e66179. doi: 10.1371/journal.pone.0066179 (PMC3679032; doi:10.1371/journal.pone.0066179)
Supplement: Dataset S1 — Sertoli cell enriched genes. Transcripts that show a fold change >2 when comparing the signal in the IP to their respective inputs (enrichment) by microarray analysis in saline-treated AMH-Cre: RiboTag mice (n = 5) are listed. Statistical analysis was performed using One-way Analysis of Variance (ANOVA, p<0.05). (XLSX) [file pone.0066179.s016.xlsx]

## Sheet: IP vs I AMH-Cre RiboTag
AMH-Cre:RiboTag IP vs Input
Genes represent those in the IP that are 2 fold greater than input and pass ANOVA with FDR with p<0.05
Probe	Symbol	Description	p-value	Log Fold Change	Linear Fold Change		IP_1	IP_2	IP_3	IP_4	IP_5	Input_1	Input_2	Input_3	Input_4	Input_5
10401068	Spnb1	spectrin beta 1	0	3.53	11.5514		10.9074	10.6758	10.8325	10.5672	10.9327	7.2065	7.23549	7.1782	7.31497	7.35508
10469581	Etl4	enhancer trap locus 4	0	3.35	10.1965		11.0654	10.9468	10.9433	11.0456	11.1467	7.74993	7.55464	7.48141	7.85252	7.7451
10607143	Capn6	calpain 6	0	3.23	9.38268		11.3982	11.5686	11.5	11.3392	11.4352	8.34086	8.10295	8.14201	8.22149	8.30813
10570855	Plat	plasminogen activator, tissue	0	3.2	9.18959		10.6396	10.8362	10.8417	10.7211	10.8427	7.42666	7.54997	7.50821	7.73671	7.67336
10369264	Oit3	oncoprotein induced transcript 3	0	3.2	9.18959		10.0472	10.351	10.3092	10.129	10.1439	7.07084	6.96895	6.86778	7.16188	6.90327
10604682	Gm648	predicted gene 648	0	3.2	9.18959		10.9919	10.9463	10.9139	10.2506	10.2506	7.89042	7.46907	7.75104	7.28646	6.96244
10472820	Itga6	integrin alpha 6	0	3.17	9.00047		10.4481	10.054	10.2889	10.4265	10.3584	7.42846	6.95747	6.88848	7.47055	6.97945
10495613	4833424O15Rik	RIKEN cDNA 4833424O15 gene	0	3.14	8.81524		10.3664	10.4936	10.358	10.3046	10.3259	7.42777	7.26471	7.16216	7.35051	6.95724
10427816	Pdzd2	PDZ domain containing 2	0	3.12	8.69388		10.8203	10.5745	10.7068	10.9484	10.8591	7.75062	7.51561	7.24533	8.01422	7.7754
10403584	Nid1	nidogen 1	0	3.1	8.57419		11.1677	11.2653	11.3011	11.2893	11.2222	8.13271	8.1167	8.01865	8.39089	8.07745
10339491			0	3.09	8.51496		9.2526	9.59857	9.58076	9.41735	9.37202	6.51056	6.00474	6.23885	6.90142	6.12529
10606436	Hmgn5	high-mobility group nucleosome binding domain 5	0	3.09	8.51496		10.5444	10.2157	10.0277	11.4339	11.2267	7.28609	6.79167	7.22015	8.59005	8.09921
10474700	Thbs1	thrombospondin 1	0	3.06	8.33973		10.0555	10.103	10.1474	10.0618	10.0339	6.97317	6.95889	7.07261	6.98991	7.10871
10604765	Mcf2	mcf.2 transforming sequence	0	3.06	8.33973		10.2379	10.2794	10.2844	10.2049	10.4712	7.25227	7.22734	6.99268	7.43201	7.2832
10428619	Enpp2	ectonucleotide pyrophosphatase/phosphodiesterase 2	0	3.05	8.28212		11.6558	11.8277	11.7758	11.5814	11.7579	8.80792	8.54075	8.5324	8.58501	8.89473
10387821	Alox12	arachidonate 12-lipoxygenase	0	3.02	8.11168		10.076	9.86293	10.0296	9.69685	9.99189	7.0956	6.85893	6.9518	6.72319	6.92366
10455901	Slc27a6	solute carrier family 27 (fatty acid transporter), member 6	0	3.02	8.11168		11.3818	11.2367	11.259	11.4577	11.3286	8.5335	8.1399	8.18537	8.5182	8.1628
10438626	Etv5	ets variant gene 5	0	3.01	8.05564		10.5877	10.5991	10.7042	10.5071	10.6079	7.5484	7.42277	7.56097	7.7607	7.67643
10344897	Sulf1	sulfatase 1	0	2.99	7.94474		10.6181	10.9336	10.8854	10.4757	10.4982	7.76516	7.73876	7.61951	7.67137	7.6585
10605612			0	2.99	7.94474		11.2139	11.2692	11.0153	11.4382	11.496	8.1318	8.04123	7.99411	8.60037	8.71846
10484307	Frzb	frizzled-related protein	0	2.98	7.88986		10.6091	10.7471	10.6986	10.9002	10.8339	7.71676	7.77987	7.65585	7.97785	7.76544
10604564	Gpc4	glypican 4	0	2.98	7.88986		11.4883	11.359	11.2331	11.3722	11.4318	8.52519	8.29166	8.12005	8.55629	8.50268
10599858	4933402E13Rik	RIKEN cDNA 4933402E13 gene	0	2.98	7.88986		10.2754	10.262	10.2336	10.8382	10.8306	7.61552	7.0829	7.17279	8.01456	7.67748
10382912	2012-09-09	septin 9	0	2.97	7.83536		12.0789	11.8871	11.934	12.0796	12.0983	9.0857	8.87994	8.85967	9.17553	9.23095
10485700	Bbox1	butyrobetaine (gamma), 2-oxoglutarate dioxygenase 1 (gamma-butyrobetaine hydroxylase)	0	2.97	7.83536		11.0367	10.9334	11.042	11.0208	10.9549	8.35321	7.93662	7.81754	8.08464	7.92344
10360270	Atp1a2	ATPase, Na+/K+ transporting, alpha 2 polypeptide	0	2.97	7.83536		12.0009	11.9618	11.8871	11.9889	12.006	9.06962	8.68539	8.83576	9.24463	9.15273
10469358	Mrc1	mannose receptor, C type 1	0	2.96	7.78124		11.7909	11.9516	11.8757	11.7232	11.8369	8.86778	8.76143	8.77067	8.92174	9.04294
10572097	Sh2d4a	SH2 domain containing 4A	0	2.96	7.78124		10.5024	10.274	10.3579	10.4729	10.344	7.59388	7.19996	7.37924	7.4954	7.49888
10601616	Diap2	diaphanous homolog 2 (Drosophila)	0	2.96	7.78124		10.7005	10.5294	10.68	10.9644	10.718	7.82658	7.47512	7.55502	8.0186	7.93523
10343496			0	2.96	7.78124		9.54497	9.94561	9.77525	9.75519	9.64055	6.90538	7.01234	6.82678	6.94771	6.19364
10601360	Atp7a	ATPase, Cu++ transporting, alpha polypeptide	0	2.95	7.72749		10.8121	10.7746	10.7399	10.8939	10.8854	7.92581	7.69375	7.74318	8.11823	7.86613
10432032	Vdr	vitamin D receptor	0	2.95	7.72749		10.4325	10.4244	10.3757	10.4299	10.3757	7.25374	7.45644	7.25648	7.68679	7.61665
10370376	Pfkl	phosphofructokinase, liver, B-type	0	2.94	7.67411		11.1001	11.1468	11.1345	11.0835	11.1794	8.04479	8.05133	8.26458	8.23376	8.35953
10376434	Butr1	butyrophilin related 1	0	2.94	7.67411		10.5789	10.5857	10.6879	10.4009	10.4518	7.68977	7.41673	7.5964	7.74941	7.55881
10467139	Lipa	lysosomal acid lipase A	0	2.94	7.67411		10.5512	10.3872	10.3993	10.201	10.2363	7.59966	7.25278	7.37891	7.44991	7.39005
10422412	Slc15a1	solute carrier family 15 (oligopeptide transporter), member 1	0	2.94	7.67411		8.12579	8.81425	8.61679	8.45365	8.85167	5.30439	5.79173	5.72189	5.74377	5.58031
10596148	Trf	transferrin	0	2.93	7.6211		11.4545	11.7834	11.7242	11.4503	11.7982	8.59059	8.70115	8.6606	8.7664	8.83499
10494174	Sema6c	sema domain, transmembrane domain (TM), and cytoplasmic domain, (semaphorin) 6C	0	2.92	7.56846		11.2215	11.1086	11.1623	11.3593	11.3	8.24921	8.14264	8.13678	8.50089	8.50725
10367673	Plekhg1	pleckstrin homology domain containing, family G (with RhoGef domain) member 1	0	2.92	7.56846		10.5649	10.504	10.5115	10.5779	10.7249	7.65223	7.47303	7.5171	7.98092	7.67264
10531737	Hpse	heparanase	0	2.91	7.51618		10.7445	10.6087	10.4631	10.4986	10.4492	7.91544	7.51771	7.60002	7.6953	7.47864
10431659	Kif21a	kinesin family member 21A	0	2.91	7.51618		10.741	10.6468	10.7539	10.7597	10.8101	7.94875	7.55843	7.59675	8.10931	7.95196
10447056	Qpct	glutaminyl-peptide cyclotransferase (glutaminyl cyclase)	0	2.91	7.51618		11.4323	11.2526	11.2662	11.549	11.3854	8.73824	8.10966	8.32501	8.61259	8.54858
10519886	Sema3c	sema domain, immunoglobulin domain (Ig), short basic domain, secreted, (semaphorin) 3C	0	2.9	7.46426		10.9557	10.8324	10.8355	10.6397	10.7544	8.03354	7.84103	7.791	7.99048	7.87424
10607089	Acsl4	acyl-CoA synthetase long-chain family member 4	0	2.9	7.46426		11.3318	11.3346	11.4062	11.2072	11.3664	8.51665	8.26347	8.24397	8.57332	8.52445
10411519	Mtap1b	microtubule-associated protein 1B	0	2.9	7.46426		11.6028	11.4146	11.4415	11.5955	11.4835	8.58442	8.48541	8.42535	8.88909	8.64965
10560709	Pvr	poliovirus receptor	0	2.9	7.46426		10.5168	10.3931	10.3039	10.4021	10.3785	7.57343	7.32062	7.25949	7.72662	7.6228
10361790	Fuca2	fucosidase, alpha-L- 2, plasma	0	2.9	7.46426		11.7371	11.7365	11.7639	11.5012	11.5087	9.09868	8.85322	8.87416	8.61975	8.30903
10451679	Daam2	dishevelled associated activator of morphogenesis 2	0	2.9	7.46426		11.4319	11.1545	11.159	11.7077	11.6885	8.30947	8.11425	8.32367	8.92838	8.97288
10407327	Emb	embigin	0	2.89	7.4127		10.9335	11.0701	11.2437	10.9434	11.1572	8.00548	8.191	8.33998	8.11144	8.2494
10362104	Slc2a12	solute carrier family 2 (facilitated glucose transporter), member 12	0	2.89	7.4127		10.5715	10.5602	10.6844	10.4007	10.6223	7.66172	7.43905	7.66999	7.73027	7.86811
10453499	Fshr	follicle stimulating hormone receptor	0	2.89	7.4127		9.32027	9.41826	9.59084	9.13698	9.32974	6.47625	6.20371	6.44071	6.41975	6.78463
10499766	Slc27a3	solute carrier family 27 (fatty acid transporter), member 3	0	2.89	7.4127		11.0032	10.8215	10.8575	10.5491	10.4352	8.05375	7.74862	7.9628	7.72636	7.71884
10504534	Frmpd1	FERM and PDZ domain containing 1	0	2.89	7.4127		10.2573	9.98532	9.87342	10.4476	10.1273	7.41599	7.05179	6.86807	7.51187	7.38814
10552156	Rhpn2	rhophilin, Rho GTPase binding protein 2	0	2.88	7.3615		10.7528	10.5758	10.471	10.5553	10.6715	7.94389	7.54049	7.61227	7.75787	7.7798
10482802	Cytip	cytohesin 1 interacting protein	0	2.88	7.3615		10.1075	9.97771	9.93911	10.2765	10.3164	7.28349	6.98113	7.31172	7.32754	7.30969
10602428			0	2.88	7.3615		11.7193	11.4514	11.5503	11.6835	11.5739	8.85235	8.58479	8.32086	8.95772	8.84983
10489092			0	2.88	7.3615		9.77177	9.56437	9.61806	10.049	10.2755	7.01848	6.67726	6.74302	7.24464	7.20536
10491136	Tnik	TRAF2 and NCK interacting kinase	0	2.87	7.31065		11.0091	10.8484	10.8764	11.0434	11.0002	8.12923	7.87968	7.90994	8.26801	8.22822
10599008	Slc6a14	solute carrier family 6 (neurotransmitter transporter), member 14	0	2.87	7.31065		10.5511	10.698	10.6918	10.3225	10.3785	7.73007	7.68804	7.56505	7.76789	7.54251
10574259	Gpr56	G protein-coupled receptor 56	0	2.87	7.31065		11.4292	11.2998	11.3279	11.5726	11.3726	8.67057	8.3495	8.30475	8.76744	8.54899
10577954	Rab11fip1	RAB11 family interacting protein 1 (class I)	0	2.86	7.26015		10.574	10.345	10.3499	10.5439	10.5615	7.65037	7.4653	7.54495	7.71696	7.70697
10390075	Gm11545	predicted gene 11545	0	2.86	7.26015		10.2376	9.51197	9.61548	10.148	9.38402	7.27318	6.58429	6.73033	7.33621	6.67426
10544875	Scrn1	secernin 1	0	2.85	7.21		11.2257	11.2908	11.2816	11.0358	11.239	8.36674	8.38083	8.36604	8.3295	8.38932
10511631	Slc26a7	solute carrier family 26, member 7	0	2.85	7.21		11.1024	11.1041	11.0548	11.1342	11.1289	8.29718	8.06996	8.12784	8.44161	8.3487
10456392	Cidea	cell death-inducing DNA fragmentation factor, alpha subunit-like effector A	0	2.85	7.21		10.3234	10.3585	10.3569	10.2338	10.0826	7.42353	7.28727	7.36378	7.69296	7.35534
10358457	Bex4	brain expressed gene 4	0	2.85	7.21		10.193	9.82127	9.82475	10.1122	10.0533	7.31392	6.89908	7.26704	7.15496	7.14025
10384233	Tns3	tensin 3	0	2.85	7.21		10.5811	10.3513	10.4585	10.657	10.6595	7.64502	7.50106	7.54414	8.00327	7.74798
10545588	Hk2	hexokinase 2	0	2.84	7.1602		12.0035	11.9808	11.9398	11.8672	11.8779	9.08545	8.95229	9.01098	9.24153	9.17632
10487139	Shc4	SHC (Src homology 2 domain containing) family, member 4	0	2.84	7.1602		11.3613	11.2582	11.3467	11.0834	10.9982	8.43094	8.32055	8.45619	8.31249	8.33404
10532767	Ssh1	slingshot homolog 1 (Drosophila)	0	2.84	7.1602		10.5972	10.2715	10.4274	10.4943	10.3572	7.56465	7.49957	7.42018	7.79037	7.67614
10505911	Dmrta1	doublesex and mab-3 related transcription factor like family A1	0	2.84	7.1602		11.3276	11.1789	11.2045	11.278	11.3161	8.60994	8.15855	8.34227	8.61926	8.35925
10437575	Tmem114	transmembrane protein 114	0	2.84	7.1602		11.5391	11.571	11.5538	11.2174	11.1886	8.6108	8.4196	8.66093	8.63485	8.55914
10543031	Slc25a13	solute carrier family 25 (mitochondrial carrier, adenine nucleotide translocator), member 13	0	2.84	7.1602		10.683	10.7535	10.7138	10.3032	10.4572	7.9594	7.59452	7.7699	7.69971	7.706
10383198			0	2.84	7.1602		9.6605	9.47526	9.45674	9.8674	9.63596	6.84351	6.45099	6.55961	6.96092	7.05695
10339649			0	2.84	7.1602		9.11247	9.39656	9.18195	8.81112	8.94915	6.13235	7.08607	5.89437	6.38913	5.73056
10585778	Sema7a	sema domain, immunoglobulin domain (Ig), and GPI membrane anchor, (semaphorin) 7A	0	2.83	7.11074		12.2249	12.3075	12.2993	12.236	12.2951	9.45899	9.3115	9.293	9.54505	9.5953
10603417	Gata1	GATA binding protein 1	0	2.83	7.11074		11.0674	10.9415	11.03	10.8878	10.8579	8.31647	7.99951	8.07606	8.2018	8.01677
10564624	St8sia2	ST8 alpha-N-acetyl-neuraminide alpha-2,8-sialyltransferase 2	0	2.83	7.11074		10.4818	10.2053	10.2617	10.4002	10.3615	7.46146	7.3924	7.48252	7.44525	7.7951
10351491	Olfml2b	olfactomedin-like 2B	0	2.83	7.11074		10.4133	10.5082	10.6	10.3746	10.2322	7.76891	7.3556	7.60387	7.7981	7.44163
10584124	Arhgap32	Rho GTPase activating protein 32	0	2.83	7.11074		10.9998	10.6682	10.8737	11.0958	11.0322	8.01313	7.8265	7.9471	8.4246	8.29358
10530441	Corin	corin	0	2.82	7.06162		12.2916	12.1448	12.1371	11.9878	11.997	9.48712	9.17208	9.28708	9.26545	9.27052
10558410	Ptpre	protein tyrosine phosphatase, receptor type, E	0	2.82	7.06162		9.84851	9.69617	9.6162	9.89176	9.79556	7.04096	6.82478	6.79065	7.18036	6.91313
10358879	Npl	N-acetylneuraminate pyruvate lyase	0	2.82	7.06162		11.7682	11.5511	11.4908	11.7066	11.7003	8.98476	8.49512	8.7133	9.10932	8.83843
10476906	8030411F24Rik	RIKEN cDNA 8030411F24 gene	0	2.82	7.06162		9.44535	9.48961	9.44865	9.72547	9.92067	6.45145	6.61325	6.7213	7.1335	7.02478
10422028	Tbc1d4	TBC1 domain family, member 4	0	2.81	7.01285		9.04382	8.96661	9.06006	9.02075	9.11625	6.33888	6.05438	6.29516	6.24183	6.25146
10338854			0	2.81	7.01285		10.2249	10.023	10.1771	10.0432	9.93702	7.21466	7.12146	7.34085	7.59938	7.09383
10587639	Nt5e	5' nucleotidase, ecto	0	2.81	7.01285		11.1486	11.0422	11.0343	10.5984	10.7933	8.41713	8.06951	8.06004	8.01707	8.00763
10351623	F11r	F11 receptor	0	2.81	7.01285		11.7224	11.7477	11.7181	12.0068	12.1005	8.99248	8.63066	8.76669	9.49347	9.36111
10363901	Etv5	ets variant gene 5	0	2.8	6.9644		10.9759	10.8981	10.928	10.7993	10.9127	8.21525	8.08208	8.00546	8.06995	8.14001
10415052	Mmp14	matrix metallopeptidase 14 (membrane-inserted)	0	2.8	6.9644		11.4386	11.5408	11.4658	11.5652	11.5698	8.7735	8.6037	8.58494	8.86089	8.74341
10439218	Pdia5	protein disulfide isomerase associated 5	0	2.79	6.9163		12.0342	12.2	12.1783	11.8899	11.9963	9.29053	9.26878	9.34696	9.17621	9.28258
10549282	Itpr2	inositol 1,4,5-triphosphate receptor 2	0	2.79	6.9163		10.366	10.214	10.3381	10.3123	10.4158	7.62766	7.41269	7.35611	7.64806	7.63487
10576569	BC021891	cDNA sequence BC021891	0	2.79	6.9163		9.96618	9.83104	9.80914	9.94384	10.0271	7.14658	6.99725	6.88462	7.20636	7.40175
10441740	Agpat4	1-acylglycerol-3-phosphate O-acyltransferase 4 (lysophosphatidic acid acyltransferase, delta)	0	2.78	6.86852		10.8447	10.7612	10.6974	10.9464	10.8514	8.05765	7.79135	8.01606	8.22506	8.09103
10476910	Cst12	cystatin 12	0	2.78	6.86852		12.0684	11.9402	11.9045	12.3719	12.3614	9.28744	9.05906	9.07499	9.7852	9.55115
10489503	Wfdc6a	WAP four-disulfide core domain 6A	0	2.78	6.86852		12.1837	12.0075	12.0444	12.3728	12.3091	9.41596	9.0887	8.94492	9.81181	9.74903
10464836	Actn3	actinin alpha 3	0	2.77	6.82108		10.7449	10.623	10.7067	10.6157	10.5919	7.93145	7.65753	7.83854	8.02626	7.98385
10487894	Rassf2	Ras association (RalGDS/AF-6) domain family member 2	0	2.77	6.82108		10.9366	10.7968	10.8242	11.0378	11.0165	8.14677	7.91398	8.05309	8.29669	8.36892
10463265	Cnnm1	cyclin M1	0	2.77	6.82108		9.72391	9.46285	9.48162	9.92044	9.75455	6.92921	6.81369	6.6612	7.06346	7.02501
10433735	Abcc1	ATP-binding cassette, sub-family C (CFTR/MRP), member 1	0	2.76	6.77396		12.143	11.948	11.9945	11.9648	11.9987	9.31483	9.17699	9.11556	9.2563	9.37006
10398885	AW555464	expressed sequence AW555464	0	2.76	6.77396		11.2528	11.0436	11.1019	11.2948	11.4014	8.45006	8.25673	8.30332	8.65984	8.60677
10601786			0	2.76	6.77396		10.2625	10.1557	10.1707	10.2827	10.3788	7.67563	7.26406	7.24673	7.60921	7.65149
10494595	Notch2	Notch gene homolog 2 (Drosophila)	0	2.76	6.77396		10.9984	10.6061	10.6165	10.9972	10.8884	8.1165	7.90811	7.67713	8.39813	8.20521
10576332	Tubb3	tubulin, beta 3	0	2.75	6.72717		11.076	10.9541	10.8602	11.0102	11.2235	8.14188	8.06112	8.38281	8.48986	8.28172
10398025	Serpina3a	serine (or cysteine) peptidase inhibitor, clade A, member 3A	0	2.75	6.72717		11.0405	11.0167	10.8434	11.1037	10.6791	8.41242	7.95699	8.19741	8.22734	8.13534
10589773	Trank1	tetratricopeptide repeat and ankyrin repeat containing 1	0	2.75	6.72717		11.0612	10.8046	10.8834	11.2145	11.1388	8.47438	7.98841	7.77201	8.72102	8.39045
10594048	Islr2	immunoglobulin superfamily containing leucine-rich repeat 2	0	2.74	6.6807		10.0466	9.91321	10.0375	10.1196	9.98762	7.2922	7.16219	7.15301	7.3882	7.42979
10543466	Gpr37	G protein-coupled receptor 37	0	2.74	6.6807		11.4301	11.4639	11.4238	11.2685	11.2372	8.73386	8.42843	8.53731	8.68336	8.75935
10345855	Slc9a2	solute carrier family 9 (sodium/hydrogen exchanger), member 2	0	2.74	6.6807		10.756	10.6462	10.5909	10.757	10.6898	7.98839	7.8311	7.75129	8.02195	8.16633
10436456	Pros1	protein S (alpha)	0	2.74	6.6807		11.8424	11.7954	11.7755	11.5279	11.6089	9.18583	8.89009	8.98031	8.94792	8.8326
10362294	Arhgap18	Rho GTPase activating protein 18	0	2.74	6.6807		10.2546	10.4144	10.451	10.0531	10.1825	7.71761	7.4523	7.5263	7.34404	7.60995
10383202			0	2.74	6.6807		9.96578	9.74235	9.70583	10.0576	9.91926	7.17806	7.10023	6.9241	7.41015	7.06977
10407126	Plk2	polo-like kinase 2 (Drosophila)	0	2.74	6.6807		10.8452	10.9492	10.9363	10.5412	10.6565	8.25205	7.94374	8.29722	7.81177	7.94329
10447317	Epas1	endothelial PAS domain protein 1	0	2.74	6.6807		10.5438	10.4576	10.417	10.9404	11.0587	7.83321	7.70733	7.61919	8.30911	8.23896
10513061	Ctnnal1	catenin (cadherin associated protein), alpha-like 1	0	2.73	6.63456		11.5843	11.5332	11.5641	11.6014	11.6085	9.00296	8.56688	8.77324	8.92748	8.99014
10510482	Clstn1	calsyntenin 1	0	2.73	6.63456		11.2934	11.3764	11.3449	11.4319	11.4736	8.60727	8.52089	8.47089	8.76786	8.89321
10585381	Slc35f2	solute carrier family 35, member F2	0	2.73	6.63456		12.3331	12.3513	12.4177	12.051	12.1544	9.73454	9.50377	9.57015	9.41405	9.41899
10409021	Tpmt	thiopurine methyltransferase	0	2.73	6.63456		10.7965	10.7496	10.704	10.7924	10.7223	8.18833	7.8166	7.9712	8.27604	7.86011
10431697	Abcd2	ATP-binding cassette, sub-family D (ALD), member 2	0	2.73	6.63456		9.76262	9.80302	9.83736	9.41852	9.63391	7.09402	6.75294	6.98873	6.95482	7.03357
10406777	Gcnt4	glucosaminyl (N-acetyl) transferase 4, core 2 (beta-1,6-N-acetylglucosaminyltransferase)	0	2.73	6.63456		9.34583	9.31034	9.51766	9.11056	9.02606	6.59775	6.53353	6.64798	6.46503	6.43577
10536294	Peg10	paternally expressed 10	0	2.73	6.63456		12.0035	11.7947	11.7316	12.2251	12.1903	9.26844	9.1087	8.89926	9.47027	9.56211
10492864	Sh3d19	SH3 domain protein D19	0	2.72	6.58873		10.58	10.537	10.5427	10.5421	10.5353	7.83544	7.78167	7.77431	7.9177	7.83754
10601280	Dmrtc1b	DMRT-like family C1b	0	2.72	6.58873		11.2263	11.1779	11.1576	11.1178	11.1412	8.57439	8.4139	8.43818	8.3702	8.43744
10607189	Amot	angiomotin	0	2.72	6.58873		9.36994	9.27457	9.53485	9.2297	9.39928	6.55517	6.61034	6.7143	6.68041	6.62973
10593878	Snx33	sorting nexin 33	0	2.72	6.58873		10.8526	10.6738	10.6472	10.7626	10.6517	8.06231	7.83551	7.95437	8.10369	8.03564
10354168	Tbc1d8	TBC1 domain family, member 8	0	2.72	6.58873		10.8004	10.6272	10.7068	10.7568	10.7997	8.1466	7.91036	7.8877	7.99634	8.13586
10383152			0	2.72	6.58873		9.47161	9.33135	9.21363	9.44751	9.40355	6.70186	6.51129	6.42313	6.85337	6.76611
10500021	Cgn	cingulin	0	2.72	6.58873		11.5051	11.41	11.46	11.6959	11.7551	8.93407	8.59072	8.76297	8.89814	9.03739
10585803	Stra6	stimulated by retinoic acid gene 6	0	2.72	6.58873		10.1285	10.1964	10.3277	10.4192	10.4442	7.43974	7.33066	7.38413	7.79417	7.95424
10382328	Sox9	SRY-box containing gene 9	0	2.71	6.54322		11.257	11.0766	11.1108	11.1615	11.1006	8.41974	8.32812	8.32422	8.5817	8.50139
10606979			0	2.71	6.54322		10.9002	10.954	10.8298	10.9279	10.9375	8.27117	8.02955	8.15984	8.16641	8.3747
10547719	Clstn3	calsyntenin 3	0	2.71	6.54322		10.1359	10.2516	10.089	9.97358	10.1044	7.51505	7.28519	7.29422	7.49058	7.42739
10531610	Rasgef1b	RasGEF domain family, member 1B	0	2.71	6.54322		9.85599	9.66714	9.66776	9.67575	9.88835	7.01601	6.854	7.00139	7.16451	7.16547
10441565	Rps6ka2	ribosomal protein S6 kinase, polypeptide 2	0	2.71	6.54322		11.382	11.0865	11.1953	11.2238	11.2368	8.65849	8.31393	8.39238	8.68333	8.54813
10600777	AU015836	expressed sequence AU015836	0	2.71	6.54322		11.3768	11.3164	11.3657	11.4845	11.617	8.8535	8.47157	8.62108	8.85921	8.79862
10556381	Mical2	microtubule associated monoxygenase, calponin and LIM domain containing 2	0	2.71	6.54322		10.7135	10.4163	10.5865	10.6761	10.7136	7.89002	7.77095	7.72403	8.14145	8.0374
10607283	Maged2	melanoma antigen, family D, 2	0	2.71	6.54322		10.6926	10.6075	10.6556	10.7807	10.7707	8.06516	7.62168	7.89752	8.14844	8.20971
10534066	2012-09-14	septin 14	0	2.71	6.54322		12.2734	12.1321	12.1528	12.421	12.4268	9.66913	9.28837	9.22442	9.95965	9.69551
10355278	Erbb4	v-erb-a erythroblastic leukemia viral oncogene homolog 4 (avian)	0	2.7	6.49802		9.22271	9.02288	9.18028	9.11732	8.94736	6.43373	6.38047	6.48088	6.48528	6.23499
10452907	Fez2	fasciculation and elongation protein zeta 2 (zygin II)	0	2.7	6.49802		9.78544	9.7339	9.70034	9.73386	9.86269	7.04108	6.88565	6.98637	7.31135	7.08408
10602692	Rragb	Ras-related GTP binding B	0	2.7	6.49802		10.7129	10.5336	10.44	10.6139	10.6548	8.01275	7.68846	7.74882	8.05741	7.948
10605437	Pls3	plastin 3 (T-isoform)	0	2.7	6.49802		10.7547	10.8997	10.8936	10.5171	10.6733	8.20682	7.91054	7.88306	8.14539	8.10572
10557300	Aqp8	aquaporin 8	0	2.7	6.49802		12.4578	12.3593	12.3108	12.1323	12.0342	9.64548	9.43813	9.48407	9.77506	9.43257
10466779	Pip5k1b	phosphatidylinositol-4-phosphate 5-kinase, type 1 beta	0	2.7	6.49802		10.6595	10.4797	10.4836	10.8209	10.672	8.02834	7.72555	7.57467	8.15067	8.16088
10411668	Ocln	occludin	0	2.69	6.45313		9.7924	9.69556	9.65904	9.53673	9.61591	6.91017	6.77997	7.04243	7.06763	7.0541
10443463	Cdkn1a	cyclin-dependent kinase inhibitor 1A (P21)	0	2.69	6.45313		10.08	9.95305	10.1316	10.2086	10.065	7.4131	7.24763	7.34563	7.60246	7.35843
10363350	P4ha1	procollagen-proline, 2-oxoglutarate 4-dioxygenase (proline 4-hydroxylase), alpha 1 polypeptide	0	2.69	6.45313		11.4083	11.3347	11.4205	11.3394	11.2272	8.86642	8.52406	8.53632	8.751	8.61753
10523595	Ptpn13	protein tyrosine phosphatase, non-receptor type 13	0	2.69	6.45313		10.5527	10.4254	10.5326	10.4883	10.7507	7.93715	7.66377	7.78807	7.91482	7.97496
10423293	Myo10	myosin X	0	2.69	6.45313		11.9311	11.6515	11.644	11.7116	11.6305	9.17364	8.83335	8.79162	9.18529	9.15004
10368886			0	2.69	6.45313		11.8437	11.6651	11.7104	11.5743	11.7141	9.06848	8.79536	8.78937	9.13735	9.27314
10604057	2012-09-06	septin 6	0	2.68	6.40856		11.832	11.8883	11.9029	11.7039	11.7527	9.29148	9.05938	9.04156	9.1247	9.18234
10602251			0	2.68	6.40856		11.1822	11.1206	11.0484	11.1045	11.0725	8.66141	8.36289	8.33983	8.4928	8.27984
10438189	Slc7a4	solute carrier family 7 (cationic amino acid transporter, y+ system), member 4	0	2.68	6.40856		12.0455	11.9271	11.9797	11.7234	11.6979	9.33509	9.11404	9.17928	9.25525	9.06509
10607738	Car5b	carbonic anhydrase 5b, mitochondrial	0	2.68	6.40856		10.9221	10.9803	11.1073	10.7771	10.9147	8.35561	8.01054	8.1809	8.39031	8.34498
10601850	Bex4	brain expressed gene 4	0	2.68	6.40856		10.4344	10.1735	10.1401	10.2362	10.2353	7.74869	7.32698	7.7347	7.45584	7.54768
10405236	Sfxn1	sideroflexin 1	0	2.67	6.36429		10.7709	10.8086	10.9119	10.7262	10.8493	8.19899	8.04263	8.09579	8.20348	8.18967
10433274	Vasn	vasorin	0	2.67	6.36429		10.551	10.3366	10.3418	10.4122	10.4465	7.66275	7.67042	7.73641	7.85011	7.8301
10496727	Ddah1	dimethylarginine dimethylaminohydrolase 1	0	2.67	6.36429		11.3789	11.3099	11.3596	11.3088	11.3017	8.79162	8.51473	8.57814	8.77557	8.65652
10369792	Arid5b	AT rich interactive domain 5B (MRF1-like)	0	2.67	6.36429		11.1092	11.0759	11.0245	10.9467	11.0699	8.37848	8.30957	8.2196	8.4956	8.46094
10557165	2010110P09Rik	RIKEN cDNA 2010110P09 gene	0	2.67	6.36429		10.4986	10.5973	10.5029	10.5763	10.6957	7.93557	7.70056	7.93788	7.94391	7.98337
10545096	Mageb16	melanoma antigen family B, 16	0	2.67	6.36429		11.7201	11.5845	11.6268	11.7851	11.7449	9.1127	8.94403	8.93597	9.18405	8.95562
10598232			0	2.67	6.36429		10.3833	10.419	10.5015	10.2679	10.5306	7.94473	7.52077	7.6497	7.75503	7.87783
10357472	Cxcr4	chemokine (C-X-C motif) receptor 4	0	2.67	6.36429		10.405	10.5074	10.6559	10.7009	10.9292	7.7348	7.77175	7.8334	8.26563	8.2568
10560510	Mark4	MAP/microtubule affinity-regulating kinase 4	0	2.67	6.36429		10.2801	9.99942	9.96203	10.834	10.8375	7.58682	7.50675	7.36637	8.02458	8.05746
10549097	Ldhb	lactate dehydrogenase B	0	2.66	6.32033		12.224	12.1884	12.1042	12.0929	12.1211	9.57197	9.48535	9.41322	9.45499	9.51947
10408280	Lrrc16a	leucine rich repeat containing 16A	0	2.66	6.32033		11.5695	11.5131	11.5581	11.5159	11.5489	8.89841	8.80085	8.79839	8.9748	8.95275
10606619	Sytl4	synaptotagmin-like 4	0	2.66	6.32033		10.3235	10.273	10.1933	10.1694	10.2737	7.69576	7.42718	7.46557	7.66322	7.6569
10534889	Agfg2	ArfGAP with FG repeats 2	0	2.66	6.32033		11.0002	10.913	10.9339	10.9055	10.8642	8.3282	8.04703	8.13441	8.45873	8.36348
10363118	Dcbld1	discoidin, CUB and LCCL domain containing 1	0	2.66	6.32033		9.63587	9.51773	9.62482	9.41827	9.33985	6.94791	6.81677	6.8983	6.62828	6.93802
10373902	Gatsl3	GATS protein-like 3	0	2.66	6.32033		10.991	10.8332	10.8165	10.7797	10.6981	8.43536	7.98943	7.95298	8.35334	8.07918
10426315	Lrrk2	leucine-rich repeat kinase 2	0	2.65	6.27667		10.0896	9.85676	9.9972	9.75039	9.79945	7.21975	7.00275	7.28811	7.42365	7.29579
10431035	Ttll12	tubulin tyrosine ligase-like family, member 12	0	2.65	6.27667		10.9842	10.6504	10.8233	10.5077	10.7675	8.25826	7.89988	8.17602	8.14354	7.98547
10467871	Dnmbp	dynamin binding protein	0	2.65	6.27667		10.264	10.0697	10.0054	10.3698	10.2686	7.4365	7.46894	7.32131	7.85477	7.62904
10339756			0	2.65	6.27667		10.1822	9.78292	10.1214	10.8359	10.4821	7.55417	6.98449	7.19219	8.36336	8.04184
10564713	Mfge8	milk fat globule-EGF factor 8 protein	0	2.64	6.23332		12.5557	12.5112	12.5594	12.3295	12.3047	9.88811	9.72365	9.79752	9.82622	9.81908
10513320	Ptgr1	prostaglandin reductase 1	0	2.64	6.23332		11.3436	11.1817	11.1633	11.2508	11.2978	8.75058	8.34443	8.518	8.68377	8.73909
10420747	Gata4	GATA binding protein 4	0	2.64	6.23332		10.8858	10.8939	10.8512	11.0688	11.027	8.25951	8.10695	8.18612	8.52306	8.45535
10456904	Pstpip2	proline-serine-threonine phosphatase-interacting protein 2	0	2.64	6.23332		9.75066	9.82671	9.64975	9.40761	9.50732	7.20669	6.8685	6.85424	7.02901	6.99418
10569830	2310057J16Rik	RIKEN cDNA 2310057J16 gene	0	2.64	6.23332		10.5516	10.6585	10.5781	10.549	10.6434	8.15855	8.05272	7.63736	8.13865	7.79949
10599663	4930502E18Rik	RIKEN cDNA 4930502E18 gene	0	2.64	6.23332		10.0209	9.85798	9.53968	9.7545	9.96668	7.37864	6.99789	7.01587	7.22845	7.30231
10546855	Srgap3	SLIT-ROBO Rho GTPase activating protein 3	0	2.64	6.23332		10.8507	10.6143	10.5224	10.7387	10.6352	8.17587	7.77677	7.78322	8.23417	8.2134
10339559			0	2.64	6.23332		10.0824	10.1435	10.3135	10.4107	10.3997	7.46328	7.66121	7.80709	7.95936	7.25447
10359689	Atp1b1	ATPase, Na+/K+ transporting, beta 1 polypeptide	0	2.63	6.19026		11.7054	11.6898	11.5837	11.6795	11.6825	9.16952	9.03196	8.86379	9.10818	9.01257
10541268	Slc25a18	solute carrier family 25 (mitochondrial carrier), member 18	0	2.63	6.19026		10.1723	10.2571	10.0633	10.1955	10.0446	7.51433	7.49287	7.3967	7.45823	7.73629
10567134	Plekha7	pleckstrin homology domain containing, family A member 7	0	2.63	6.19026		9.56632	9.45136	9.4271	9.6072	9.64705	7.07851	6.89127	6.6196	6.96006	6.99263
10531437	Scarb2	scavenger receptor class B, member 2	0	2.63	6.19026		10.4602	10.3895	10.3157	10.547	10.3995	7.90952	7.66678	7.67265	8.05831	7.63021
10351347	Creg1	cellular repressor of E1A-stimulated genes 1	0	2.63	6.19026		12.0623	11.8806	12.0232	11.6836	11.7309	9.47095	9.20232	9.28011	9.26036	9.01624
10342764			0	2.63	6.19026		9.89862	9.82038	9.7974	9.55356	9.47629	7.20176	6.70868	7.23416	7.38474	6.8741
10342170			0	2.63	6.19026		10.8926	10.3654	10.2501	10.8816	11.2845	8.34768	7.58073	7.8111	8.58123	8.19539
10601834	Gprasp2	G protein-coupled receptor associated sorting protein 2	0	2.62	6.1475		11.0175	11.0633	11.0114	10.9834	11.0891	8.47638	8.28957	8.45432	8.50553	8.31974
10496789	Lpar3	lysophosphatidic acid receptor 3	0	2.62	6.1475		10.9776	10.892	10.894	10.967	10.9422	8.28351	8.14199	8.29147	8.36686	8.49348
10367641	Mthfd1l	methylenetetrahydrofolate dehydrogenase (NADP+ dependent) 1-like	0	2.62	6.1475		9.86629	9.76097	9.81854	9.63593	9.65995	7.25303	7.08372	7.03815	7.03925	7.22027
10605542	Mageb16	melanoma antigen family B, 16	0	2.62	6.1475		11.2965	11.1863	11.2272	11.4087	11.3398	8.7111	8.56384	8.61328	8.85384	8.62794
10439483	Arhgap31	Rho GTPase activating protein 31	0	2.62	6.1475		10.4017	10.3393	10.3695	10.4695	10.5265	7.72745	7.69064	7.69347	7.94175	7.93879
10562181	Lsr	lipolysis stimulated lipoprotein receptor	0	2.62	6.1475		11.2724	11.131	11.3259	11.0356	11.0086	8.67406	8.49101	8.54556	8.48997	8.49708
10488482	Acss1	acyl-CoA synthetase short-chain family member 1	0	2.62	6.1475		10.87	10.9124	10.9251	10.5571	10.709	8.23961	8.08934	8.23451	8.14177	8.1774
10372028	Plxnc1	plexin C1	0	2.62	6.1475		10.9388	10.7688	10.7849	10.7366	10.7362	8.28286	7.9914	8.01128	8.21054	8.3783
10422396	Stk24	serine/threonine kinase 24 (STE20 homolog, yeast)	0	2.62	6.1475		11.2612	11.1133	11.16	11.3689	11.3592	8.68819	8.39247	8.45453	8.86853	8.76284
10440738	Tiam1	T-cell lymphoma invasion and metastasis 1	0	2.62	6.1475		11.2722	11.0434	11.0082	11.4395	11.3209	8.56905	8.50029	8.36995	8.8354	8.7105
10531370	Naaa	N-acylethanolamine acid amidase	0	2.62	6.1475		10.0424	10.1613	10.0803	9.68565	9.6861	7.61932	7.3496	7.28822	7.35215	6.93183
10607346	Tspyl2	TSPY-like 2	0	2.61	6.10504		11.423	11.4626	11.4334	11.462	11.4655	8.83888	8.76905	8.85769	8.76461	8.95463
10366746	Lrig3	leucine-rich repeats and immunoglobulin-like domains 3	0	2.61	6.10504		9.35514	9.20899	9.12522	9.20127	9.18937	6.52877	6.56395	6.68199	6.6828	6.56138
10548359	Clec12b	C-type lectin domain family 12, member B	0	2.61	6.10504		11.6478	11.6305	11.6532	11.4783	11.4516	9.21206	8.8828	9.04529	8.78521	8.91033
10406817	Enc1	ectodermal-neural cortex 1	0	2.61	6.10504		11.327	11.2304	11.257	11.1853	11.2169	8.7758	8.38213	8.48079	8.75467	8.79532
10497548	Fndc3b	fibronectin type III domain containing 3B	0	2.61	6.10504		10.7797	10.6222	10.6561	10.8383	10.7185	8.23295	7.79101	7.99483	8.31546	8.2379
10461721	Mpeg1	macrophage expressed gene 1	0	2.61	6.10504		9.77959	9.59254	9.67504	9.73007	9.73096	7.14633	6.79135	7.09687	7.46536	6.94001
10501754	D3Bwg0562e	DNA segment, Chr 3, Brigham & Women's Genetics 0562 expressed	0	2.61	6.10504		9.41625	9.97371	10.0857	9.24024	9.9759	7.01674	7.32557	7.37822	6.81498	7.12824
10604333	Dcaf12l1	DDB1 and CUL4 associated factor 12-like 1	0	2.61	6.10504		9.96216	9.92211	9.24602	9.0738	10.1503	7.44654	7.2113	6.35246	6.86806	7.4128
10594652	Lactb	lactamase, beta	0	2.6	6.06287		9.84823	9.74054	9.90726	9.96927	10.0122	7.24915	7.1823	7.27919	7.37614	7.41223
10595466	Pgm3	phosphoglucomutase 3	0	2.6	6.06287		10.7203	10.6843	10.6764	10.6118	10.6541	8.16554	7.84782	7.97229	8.20486	8.15228
10492628	Serpini1	serine (or cysteine) peptidase inhibitor, clade I, member 1	0	2.6	6.06287		9.24995	9.28212	9.23748	9.00566	9.04941	6.61191	6.53823	6.55286	6.72432	6.3906
10604630	Mospd1	motile sperm domain containing 1	0	2.6	6.06287		10.9748	11.0349	10.9488	11.175	11.2128	8.58211	8.44567	8.23058	8.54437	8.54512
10413874	Ogdhl	oxoglutarate dehydrogenase-like	0	2.6	6.06287		11.1631	11.002	11.14	11.013	11.1172	8.5888	8.20093	8.37652	8.61793	8.66528
10393970	Fasn	fatty acid synthase	0	2.6	6.06287		11.8732	11.8469	11.8713	11.9509	11.9941	9.22158	9.19023	9.07004	9.51642	9.52359
10431738	Prickle1	prickle homolog 1 (Drosophila)	0	2.6	6.06287		10.1034	9.6813	9.75755	9.73728	9.5873	7.31067	7.22325	7.18157	7.15667	7.00282
10383200			0	2.6	6.06287		8.83098	8.64699	8.68696	8.87255	8.93514	6.1482	6.02524	6.16715	6.52362	6.11951
10589761			0	2.6	6.06287		11.5099	11.4101	11.5697	11.6545	11.6282	9.30977	8.67397	8.54771	9.17606	9.04674
10400405	Nfkbia	nuclear factor of kappa light polypeptide gene enhancer in B-cells inhibitor, alpha	0	2.6	6.06287		10.8202	10.7206	10.6361	11.1621	11.098	8.35033	7.97329	8.06837	8.60118	8.44987
10413059	Vcl	vinculin	0	2.59	6.02099		11.7639	11.7925	11.7699	11.7668	11.8089	9.17587	9.15035	9.03617	9.27346	9.29828
10447799	Igf2r	insulin-like growth factor 2 receptor	0	2.59	6.02099		10.5425	10.632	10.6156	10.3709	10.5017	7.91616	7.86319	7.91532	8.06818	7.95343
10500911	Mov10	Moloney leukemia virus 10	0	2.59	6.02099		11.5456	11.4807	11.543	11.392	11.4749	8.86202	8.76175	8.84088	8.91755	9.10311
10368380	L3mbtl3	l(3)mbt-like 3 (Drosophila)	0	2.59	6.02099		9.53473	9.71226	9.58594	9.44408	9.64865	7.00091	6.86031	6.93123	7.11255	7.07654
10412100	Map3k1	mitogen-activated protein kinase kinase kinase 1	0	2.59	6.02099		10.2213	9.98887	9.99872	10.1002	10.1227	7.52207	7.2747	7.43155	7.63023	7.63221
10601729	Drp2	dystrophin related protein 2	0	2.59	6.02099		9.26819	9.46415	9.41581	9.24634	9.59253	6.70126	6.80848	6.70004	6.78668	7.03123
10450605	Tubb5	tubulin, beta 5	0	2.59	6.02099		12.3296	12.4682	12.3757	12.5201	12.6589	9.88106	9.69134	9.6674	10.092	10.0661
10453857	Gata6	GATA binding protein 6	0	2.59	6.02099		10.7276	10.7528	10.7279	10.6619	10.6653	8.27849	8.14398	7.7713	8.37533	8.0226
10549041	Slco1a5	solute carrier organic anion transporter family, member 1a5	0	2.59	6.02099		8.26891	8.5268	8.60747	8.25938	8.26579	5.89737	5.61794	5.63441	6.03635	5.76911
10600901	Ar	androgen receptor	0	2.59	6.02099		9.54693	9.4325	9.35609	9.57067	9.37166	7.02794	6.49907	6.7772	6.98885	7.03231
10606770	Zmat1	zinc finger, matrin type 1	0	2.59	6.02099		9.06047	8.97657	9.04513	8.91523	9.21599	6.58657	6.00278	6.40897	6.63873	6.60774
10462853	Cyp26a1	cytochrome P450, family 26, subfamily a, polypeptide 1	0	2.59	6.02099		8.48437	8.73359	8.59967	8.0778	8.33681	6.00212	6.02485	5.8485	5.62353	5.78794
10518882	Espn	espin	0	2.59	6.02099		11.0113	10.8006	10.8701	11.3822	11.4474	8.37923	8.38672	8.23491	8.76183	8.8128
10558481	Dpysl4	dihydropyrimidinase-like 4	0	2.58	5.9794		10.1203	10.0739	10.0745	10.1053	10.168	7.60093	7.45518	7.31911	7.51412	7.74592
10452538	1110012J17Rik	RIKEN cDNA 1110012J17 gene	0	2.58	5.9794		10.1963	9.91668	9.95831	10.2376	10.075	7.59136	7.33207	7.39897	7.5985	7.58472
10598409	Tcfe3	transcription factor E3	0	2.58	5.9794		10.2698	10.17	10.1566	10.1029	10.1563	7.59999	7.49643	7.34313	7.78775	7.73248
10448967	Sox8	SRY-box containing gene 8	0	2.58	5.9794		11.2079	11.2127	11.232	11.1314	11.1849	8.62731	8.37555	8.47762	8.88477	8.68639
10346838	Pard3b	par-3 partitioning defective 3 homolog B (C. elegans)	0	2.58	5.9794		9.13715	9.02938	9.03654	9.13845	9.18904	6.24582	6.52025	6.43582	6.7432	6.67912
10596637	Mapkapk3	mitogen-activated protein kinase-activated protein kinase 3	0	2.58	5.9794		9.82848	9.97463	10.1757	10.2347	10.2726	7.39127	7.59187	7.5992	7.63051	7.36167
10516932	Sesn2	sestrin 2	0	2.58	5.9794		11.3991	11.4691	11.4724	11.6248	11.6846	8.82948	8.76687	8.78892	9.17852	9.1711
10383208			0	2.58	5.9794		7.95295	8.0961	7.77534	8.2813	8.25087	5.5405	5.35195	5.43567	5.6611	5.44865
10474181	Abtb2	ankyrin repeat and BTB (POZ) domain containing 2	0	2.58	5.9794		10.2889	10.0472	10.0576	10.3591	10.2876	7.61735	7.34191	7.43374	7.86499	7.88462
10383192			0	2.58	5.9794		8.25452	8.0211	7.70602	8.40145	8.21025	5.79194	5.48144	5.36876	5.47441	5.58615
10425578	Zc3h7b	zinc finger CCCH type containing 7B	0	2.58	5.9794		11.7401	11.4419	11.5008	11.911	11.8846	9.05358	8.81475	8.93271	9.4362	9.36302
10603485	Ebp	phenylalkylamine Ca2+ antagonist (emopamil) binding protein	0	2.58	5.9794		10.8766	10.7389	10.677	10.9837	11.0916	8.31193	7.9117	8.0828	8.54522	8.62573
10465619	Flrt1	fibronectin leucine rich transmembrane protein 1	0	2.58	5.9794		10.3145	10.1781	9.943	10.6121	10.3944	7.6678	7.32932	7.60472	8.05913	7.86063
10433445	Abat	4-aminobutyrate aminotransferase	0	2.57	5.93809		12.1956	12.1991	12.185	12.0776	12.1001	9.59049	9.40385	9.49666	9.71081	9.70307
10476969	Pygb	brain glycogen phosphorylase	0	2.57	5.93809		10.9292	10.896	10.9205	10.7311	10.693	8.34819	8.12298	8.24181	8.36742	8.24038
10475027	Tyro3	TYRO3 protein tyrosine kinase 3	0	2.57	5.93809		11.7111	11.4893	11.4754	11.5502	11.4812	9.06002	8.82801	8.84516	9.11004	9.03373
10571958	Sh3rf1	SH3 domain containing ring finger 1	0	2.57	5.93809		9.69024	9.56583	9.56608	9.73049	9.79549	7.06307	6.92649	7.12308	7.09874	7.30738
10553015	Bcat2	branched chain aminotransferase 2, mitochondrial	0	2.57	5.93809		11.6379	11.9092	11.9515	11.8399	12.0769	9.11845	9.26438	9.20453	9.33963	9.63382
10364494	Fstl3	follistatin-like 3	0	2.57	5.93809		11.0804	11.1328	11.261	10.6793	10.6461	8.59187	8.48379	8.51343	8.29334	8.06349
10583586	Slc44a2	solute carrier family 44, member 2	0	2.56	5.89708		12.0291	11.9418	11.9899	11.8983	11.9522	9.4405	9.34704	9.32494	9.44904	9.45489
10493435	Gba	glucosidase, beta, acid	0	2.56	5.89708		11.1129	11.1321	11.1093	11.0737	10.9228	8.63201	8.38096	8.46204	8.54786	8.50451
10503966	Aco1	aconitase 1	0	2.56	5.89708		11.3606	11.3084	11.3292	11.0649	11.1643	8.80515	8.54848	8.64936	8.71779	8.72349
10601433	Tbx22	T-box 22	0	2.56	5.89708		8.72985	8.54011	8.57786	8.60649	8.63267	6.07926	5.78312	6.18117	6.08519	6.15072
10476740	Slc24a3	solute carrier family 24 (sodium/potassium/calcium exchanger), member 3	0	2.56	5.89708		10.5979	10.7759	10.8282	10.6632	10.8289	8.0558	8.22206	8.07758	8.12525	8.43784
10462140	Dock8	dedicator of cytokinesis 8	0	2.56	5.89708		9.97409	10.06	10.13	10.1597	10.1638	7.35359	7.35091	7.5338	7.69407	7.73228
10599781	Htatsf1	HIV TAT specific factor 1	0	2.56	5.89708		11.1202	11.017	11.0203	11.2522	11.2388	8.62158	8.35739	8.40435	8.79345	8.68157
10383206			0	2.56	5.89708		9.4806	9.33853	9.34091	9.58517	9.22245	6.97823	6.72969	6.58996	7.03505	6.85183
10482500	Rnd3	Rho family GTPase 3	0	2.56	5.89708		9.3893	9.09045	9.0131	9.27782	9.26755	6.98541	6.44112	6.5442	6.80005	6.48874
10410877	Polr3g	polymerase (RNA) III (DNA directed) polypeptide G	0	2.55	5.85634		10.8571	10.7621	10.7199	10.7154	10.7094	8.25915	8.19509	8.15754	8.33456	8.08266
10463632	Tmem180	transmembrane protein 180	0	2.55	5.85634		10.993	10.8689	10.9904	10.754	10.7662	8.27345	8.46142	8.38396	8.23281	8.29439
10407445	Akr1c12	aldo-keto reductase family 1, member C12	0	2.55	5.85634		7.71146	7.68218	7.52667	7.46671	7.49328	5.01308	4.85901	4.97197	5.11994	5.15271
10548905	Eps8	epidermal growth factor receptor pathway substrate 8	0	2.55	5.85634		10.6188	10.391	10.3895	10.4081	10.4691	8.05794	7.8825	7.69564	7.98036	7.92152
10474295	Wt1	Wilms tumor 1 homolog	0	2.55	5.85634		11.9044	11.8528	11.8534	11.9964	11.9853	9.29843	9.21805	9.26986	9.54003	9.53012
10600707	Nr0b1	nuclear receptor subfamily 0, group B, member 1	0	2.55	5.85634		12.8724	12.8672	12.947	12.9324	12.9485	10.4289	10.0797	10.2136	10.5307	10.5619
10474851	Bahd1	bromo adjacent homology domain containing 1	0	2.55	5.85634		10.4558	10.4902	10.4183	10.4743	10.6657	7.80661	7.87035	7.69876	8.17424	8.20016
10367843	Utrn	utrophin	0	2.55	5.85634		9.71206	9.5388	9.53131	9.69185	9.76948	7.13433	6.82484	6.90078	7.26918	7.35545
10462035	Ldhb	lactate dehydrogenase B	0	2.54	5.81589		11.8788	11.8113	11.8121	11.7949	11.7729	9.30537	9.14126	9.27743	9.30761	9.32987
10476401	Plcb1	phospholipase C, beta 1	0	2.54	5.81589		9.51962	9.25346	9.3732	9.32908	9.39839	6.96861	6.72493	6.79828	6.91467	6.76573
10435305	Itgb5	integrin beta 5	0	2.54	5.81589		12.2791	12.1945	12.1298	12.1219	12.1403	9.73493	9.43502	9.57325	9.65034	9.75067
10473281	Itgav	integrin alpha V	0	2.54	5.81589		10.0984	10.0882	10.0752	9.9083	10.0277	7.66009	7.40346	7.33134	7.63895	7.4851
10606149	Dmrtc1a	DMRT-like family C1a	0	2.54	5.81589		11.8769	11.8221	11.7656	11.7424	11.6966	9.45264	9.23582	9.31413	9.19208	9.01716
10537146	Akr1b8	aldo-keto reductase family 1, member B8	0	2.54	5.81589		12.0676	12.0303	12.0136	12.0456	12.1476	9.65663	9.20891	9.58216	9.58886	9.58811
10501762	Snx7	sorting nexin 7	0	2.54	5.81589		9.77549	9.56428	9.68047	9.78887	9.71995	7.20517	6.89048	7.14872	7.31319	7.2604
10398032	Serpina3b	serine (or cysteine) peptidase inhibitor, clade A, member 3B	0	2.54	5.81589		8.22838	8.37304	8.27924	8.03871	8.2275	5.57672	5.52962	5.76054	5.69517	5.88731
10360848	Mosc2	MOCO sulphurase C-terminal domain containing 2	0	2.54	5.81589		10.8486	10.7123	10.7091	10.9528	10.9615	8.30769	8.08501	8.11519	8.5926	8.37037
10608724	Rhox5	reproductive homeobox 5	0	2.54	5.81589		9.50599	9.44921	9.1914	9.7289	9.70358	6.79681	6.7773	6.84497	7.25887	7.21166
10553935	Tarsl2	threonyl-tRNA synthetase-like 2	0	2.53	5.77572		10.3113	10.3484	10.445	10.3913	10.4868	7.93331	7.78082	7.9221	7.9815	7.73995
10409345	Cltb	clathrin, light polypeptide (Lcb)	0	2.53	5.77572		11.7745	11.5863	11.75	11.7976	11.7461	9.3297	8.98042	9.1262	9.38071	9.20264
10396610	Mthfd1	methylenetetrahydrofolate dehydrogenase (NADP+ dependent), methenyltetrahydrofolate cyclohydrolase, formyltetrahydrofolate synthase	0	2.53	5.77572		10.016	9.91632	10.0843	9.83188	10.0127	7.44943	7.27651	7.28563	7.56362	7.62804
10383168			0	2.53	5.77572		9.57293	9.37322	9.4304	9.68696	9.52992	7.15313	6.84898	6.81773	7.21029	6.93014
10604347	Smarca1	SWI/SNF related, matrix associated, actin dependent regulator of chromatin, subfamily a, member 1	0	2.53	5.77572		10.2336	10.2063	10.3272	10.2476	10.2938	7.98851	7.43603	7.57608	7.99573	7.68223
10524866	Vsig10	V-set and immunoglobulin domain containing 10	0	2.53	5.77572		10.7732	10.9162	10.7614	10.9274	11.1584	8.29947	8.10937	8.2646	8.64079	8.57379
10370766	Gamt	guanidinoacetate methyltransferase	0	2.52	5.73582		11.1565	11.0615	11.1592	10.9311	11.0767	8.5328	8.56826	8.55758	8.55692	8.56355
10363379	Cbara1	calcium binding atopy-related autoantigen 1	0	2.52	5.73582		11.0825	11.0297	11.1433	11.0058	10.967	8.60427	8.34187	8.58351	8.60844	8.49848
10349782	Nuak2	NUAK family, SNF1-like kinase, 2	0	2.52	5.73582		9.8665	9.74182	9.80045	9.8421	9.86547	7.47355	7.1102	7.1655	7.40534	7.34225
10553598	Cyfip1	cytoplasmic FMR1 interacting protein 1	0	2.52	5.73582		10.4416	10.2702	10.3764	10.2113	10.302	7.95614	7.60751	7.73736	7.94113	7.78365
10357986	Ptprv	protein tyrosine phosphatase, receptor type, V	0	2.52	5.73582		9.96503	9.69387	9.8695	9.6951	9.79242	7.1108	7.37336	7.27166	7.22321	7.44163
10425945	Fbln1	fibulin 1	0	2.52	5.73582		10.5456	10.5679	10.6	10.4367	10.1966	8.05666	7.90246	7.84005	8.01547	7.90806
10603151	Gpm6b	glycoprotein m6b	0	2.52	5.73582		11.6072	11.6442	11.6398	11.227	11.4105	9.04468	8.99833	8.99979	8.80239	9.05926
10358434	Pla2g4a	phospholipase A2, group IVA (cytosolic, calcium-dependent)	0	2.52	5.73582		8.65872	8.83278	8.73283	8.72149	8.88034	6.22565	6.0039	6.12807	6.51195	6.34403
10481540	Fnbp1	formin binding protein 1	0	2.51	5.6962		10.2781	10.2521	10.3005	10.2133	10.2644	7.80975	7.50491	7.79219	7.73493	7.89317
10357155	Inhbb	inhibin beta-B	0	2.51	5.6962		9.96557	9.9386	9.79057	10.164	10.1272	7.48731	7.39976	7.35645	7.59353	7.57813
10496023	Casp6	caspase 6	0	2.51	5.6962		10.0729	10.0768	10.0953	9.81378	9.92162	7.64876	7.33532	7.49323	7.36334	7.59889
10598848	Phf16	PHD finger protein 16	0	2.51	5.6962		11.5446	11.4774	11.4664	11.563	11.5789	9.0367	8.74958	8.88666	9.24397	9.15554
10604148	Rhox8	reproductive homeobox 8	0	2.51	5.6962		11.4301	11.32	11.3644	11.5823	11.6636	8.88591	8.83268	8.79786	9.1951	9.0756
10402665	Cdc42bpb	CDC42 binding protein kinase beta	0	2.51	5.6962		11.3104	11.1601	11.2216	11.4694	11.4567	8.76147	8.6888	8.61295	8.98666	9.04006
10587446	Myo6	myosin VI	0	2.51	5.6962		10.9916	10.7299	10.7839	10.4632	10.6152	8.3641	8.06655	8.04626	8.27195	8.26772
10559177	B130016D09Rik	RIKEN cDNA B130016D09 cDNA	0	2.51	5.6962		10.0451	9.75252	9.71723	9.76958	9.68479	7.42475	7.2222	6.95709	7.44195	7.39271
10546760	Ddx3x	DEAD/H (Asp-Glu-Ala-Asp/His) box polypeptide 3, X-linked	0	2.51	5.6962		10.4799	10.3224	10.375	10.425	10.4416	8.20694	7.68076	7.52721	8.09996	7.97254
10520187	Slc4a2	solute carrier family 4 (anion exchanger), member 2	0	2.5	5.65685		11.1064	11.0335	11.0731	10.9922	10.986	8.55348	8.45443	8.50509	8.57053	8.59701
10402268	Lgmn	legumain	0	2.5	5.65685		12.7989	12.7157	12.7718	12.6561	12.7388	10.3155	10.116	10.1592	10.3536	10.2513
10544885	Fkbp14	FK506 binding protein 14	0	2.5	5.65685		11.0562	11.0953	10.9995	10.8081	10.9215	8.67035	8.42803	8.44757	8.40114	8.44773
10477134	Defb36	defensin beta 36	0	2.5	5.65685		12.275	12.3476	12.3164	12.1478	12.25	9.75029	9.69923	9.61818	10.0231	9.74513
10426812	Gpd1	glycerol-3-phosphate dehydrogenase 1 (soluble)	0	2.5	5.65685		11.2081	11.0587	11.0511	11.3332	11.2244	8.70863	8.36397	8.52347	8.95092	8.82616
10361828	Cited2	Cbp/p300-interacting transactivator, with Glu/Asp-rich carboxy-terminal domain, 2	0	2.5	5.65685		12.0994	12.0091	12.0636	12.3247	12.2231	9.60915	9.44648	9.39361	9.8132	9.94374
10389816	Tom1l1	target of myb1-like 1 (chicken)	0	2.5	5.65685		10.3099	10.1469	10.1765	10.3786	10.3422	7.91517	7.53088	7.4555	8.05299	7.8875
10565002	Crtc3	CREB regulated transcription coactivator 3	0	2.5	5.65685		9.35261	9.2686	9.41523	9.90892	9.96104	6.90199	7.01869	6.95835	7.29623	7.25505
10381474	Arl4d	ADP-ribosylation factor-like 4D	0	2.5	5.65685		11.2873	11.3271	11.2048	10.6305	10.6081	8.88675	8.61769	8.56716	8.3085	8.16204
10382376	Ttyh2	tweety homolog 2 (Drosophila)	0	2.49	5.61778		11.9396	12.0155	12.1208	11.8289	11.9322	9.60542	9.43473	9.33416	9.52469	9.46548
10594404	Smad3	MAD homolog 3 (Drosophila)	0	2.49	5.61778		9.89511	10.0986	10.092	9.98872	9.87867	7.44567	7.42812	7.45537	7.50437	7.69356
10477052	2310046K01Rik	RIKEN cDNA 2310046K01 gene	0	2.49	5.61778		11.6733	11.8138	11.7694	11.5752	11.6082	9.35307	9.20623	9.24048	9.12976	9.04037
10371321	Slc41a2	solute carrier family 41, member 2	0	2.49	5.61778		12.08	12.004	12.0216	11.865	11.9081	9.7288	9.44838	9.4353	9.41444	9.39773
10436841	Il10rb	interleukin 10 receptor, beta	0	2.49	5.61778		10.8697	10.6963	10.6357	10.5786	10.6933	8.37826	8.14419	8.01176	8.27825	8.22066
10607302	Gnl3l	guanine nucleotide binding protein-like 3 (nucleolar)-like	0	2.49	5.61778		9.79433	9.7694	9.73326	9.5122	9.65197	7.35159	7.2245	7.08123	7.34543	7.01216
10605943	Pdzd11	PDZ domain containing 11	0	2.49	5.61778		10.1889	10.0206	9.98301	10.2885	10.2364	7.67649	7.48411	7.59039	7.87345	7.62686
10530516	Txk	TXK tyrosine kinase	0	2.49	5.61778		9.53396	9.36394	9.52414	9.65672	9.56234	6.84572	7.11249	7.22806	7.14427	6.85848
10604932	Cd99l2	CD99 antigen-like 2	0	2.49	5.61778		10.2269	10.1239	10.4899	10.5234	10.3296	7.82347	7.50202	7.91394	8.1177	7.87337
10383204			0	2.49	5.61778		9.07468	8.87041	8.8028	9.13337	8.90088	6.70006	6.36626	6.05176	6.71901	6.50176
10343112			0	2.49	5.61778		6.6778	6.78379	6.20981	6.47099	6.46197	4.06187	3.74874	4.0136	4.59338	3.71507
10482920	Cd302	CD302 antigen	0	2.49	5.61778		9.28382	9.0025	9.21386	9.30394	9.34657	6.71901	6.11976	6.65416	7.24679	6.94635
10429140	Ndrg1	N-myc downstream regulated gene 1	0	2.48	5.57897		10.8517	10.8238	10.9118	10.84	10.9086	8.42738	8.2598	8.43815	8.4101	8.41425
10386636	Usp22	ubiquitin specific peptidase 22	0	2.48	5.57897		11.8201	11.8935	11.8986	11.658	11.7722	9.39289	9.21333	9.30074	9.32504	9.42589
10446545	L3mbtl4	l(3)mbt-like 4 (Drosophila)	0	2.48	5.57897		9.43668	9.35629	9.22912	9.41693	9.49095	6.93861	6.82414	6.83986	6.92216	7.02873
10530806	Ppat	phosphoribosyl pyrophosphate amidotransferase	0	2.48	5.57897		11.4229	11.3435	11.389	11.2498	11.2653	8.99796	8.75727	8.76241	8.93138	8.81348
10565634	Myo7a	myosin VIIA	0	2.48	5.57897		12.117	11.9428	11.989	11.9715	12.1295	9.58941	9.37791	9.41253	9.67538	9.71516
10383214	Rnf213	ring finger protein 213	0	2.48	5.57897		9.91354	9.81087	9.84852	9.76355	9.62251	7.49471	7.17967	7.14493	7.25421	7.47018
10478540	Wfdc10	WAP four-disulfide core domain 10	0	2.48	5.57897		12.2108	12.1552	12.1719	12.0533	11.8634	9.88601	9.65775	9.46192	9.60798	9.46291
10387505	Atp1b2	ATPase, Na+/K+ transporting, beta 2 polypeptide	0	2.48	5.57897		11.0845	11.0628	11.091	11.3549	11.2608	8.5747	8.58911	8.47641	8.86731	8.93366
10386455	Rasd1	RAS, dexamethasone-induced 1	0	2.48	5.57897		11.1223	11.0496	11.0002	11.1233	11.2001	8.79318	8.31718	8.41672	8.86076	8.68534
10345715	Map4k4	mitogen-activated protein kinase kinase kinase kinase 4	0	2.48	5.57897		10.8188	10.5802	10.6536	11.0715	11.0662	8.31583	8.11469	8.17481	8.57109	8.59616
10506929	Calr4	calreticulin 4	0	2.48	5.57897		9.65403	9.48182	9.5032	9.80172	10.0188	7.13268	6.76759	7.2308	7.56593	7.38288
10505705	Sh3gl2	SH3-domain GRB2-like 2	0	2.47	5.54044		10.4458	10.4145	10.4408	10.4444	10.4974	7.98646	7.83047	7.96109	8.10729	8.00165
10363173	Gja1	gap junction protein, alpha 1	0	2.47	5.54044		12.26	12.2758	12.2594	12.2792	12.1994	9.96729	9.58668	9.75307	9.7305	9.86818
10393648	Sgsh	N-sulfoglucosamine sulfohydrolase (sulfamidase)	0	2.47	5.54044		10.1057	10.0386	9.99536	9.986	10.052	7.59304	7.35692	7.48094	7.72987	7.67953
10598723	Ddx3x	DEAD/H (Asp-Glu-Ala-Asp/His) box polypeptide 3, X-linked	0	2.47	5.54044		12.1564	12.0331	12.1761	11.9832	12.004	9.87129	9.46855	9.51401	9.67162	9.49957
10546853	Srgap3	SLIT-ROBO Rho GTPase activating protein 3	0	2.47	5.54044		10.1607	10.0656	9.90123	9.82967	9.76863	7.57268	7.33651	7.48347	7.39797	7.56171
10603289	Clcn5	chloride channel 5	0	2.47	5.54044		10.2275	10.3075	10.3366	9.9391	9.99629	7.71772	7.54947	7.60442	7.82123	7.77999
10346564	Casp8	caspase 8	0	2.47	5.54044		8.77837	8.82545	8.90271	8.57834	9.11508	6.4102	6.25046	6.51142	6.38113	6.31745
10546184	Plxna1	plexin A1	0	2.47	5.54044		11.5203	11.1168	11.19	11.5285	11.4705	8.8411	8.81087	8.6542	9.08626	9.071
10352954	Hmgb3	high mobility group box 3	0	2.47	5.54044		11.278	10.9887	10.9865	11.4666	11.3008	8.85916	8.38181	8.5863	9.05719	8.80558
10408928	Hspb1	heat shock protein 1	0	2.47	5.54044		10.7149	10.4724	10.6688	11.509	11.5069	8.44701	8.23862	8.28614	8.78454	8.77771
10353803	Uggt1	UDP-glucose glycoprotein glucosyltransferase 1	0	2.46	5.50217		11.2015	11.3033	11.2989	11.2856	11.3126	8.90986	8.70227	8.76424	8.80969	8.90806
10569618	Ano1	anoctamin 1, calcium activated chloride channel	0	2.46	5.50217		11.3525	11.3024	11.2636	11.188	11.1157	8.86419	8.65121	8.68094	8.84586	8.87978
10460157	Cpt1a	carnitine palmitoyltransferase 1a, liver	0	2.46	5.50217		11.5478	11.4519	11.4536	11.3329	11.4027	9.05543	8.80026	8.88826	9.14415	8.99361
10344743	3110035E14Rik	RIKEN cDNA 3110035E14 gene	0	2.46	5.50217		9.14392	9.20036	9.21704	9.05401	9.02578	6.58525	6.67001	6.50499	6.69667	6.86365
10528583	Cdk5	cyclin-dependent kinase 5	0	2.46	5.50217		12.1194	12.0024	12.0726	12.1473	12.1054	9.74899	9.47371	9.47247	9.83941	9.60161
10383212			0	2.46	5.50217		9.59223	9.58307	9.59616	9.81401	9.73777	7.2222	7.02169	7.09938	7.34158	7.34708
10427918	Fam105a	family with sequence similarity 105, member A	0	2.46	5.50217		9.53073	9.36964	9.27612	9.56984	9.56597	6.87288	6.96191	6.89609	7.28475	6.98479
10456317	Zfp532	zinc finger protein 532	0	2.46	5.50217		9.87632	9.72144	9.64867	9.51247	9.60197	7.06374	7.05255	7.159	7.35325	7.42629
10577882	Hgsnat	heparan-alpha-glucosaminide N-acetyltransferase	0	2.46	5.50217		12.067	11.8826	11.8998	11.8168	11.8068	9.66622	9.23937	9.22315	9.5453	9.49046
10602644	Kdm5c	lysine (K)-specific demethylase 5C	0	2.46	5.50217		9.93071	9.72901	9.86181	10.1022	10.1021	7.47341	7.42884	7.27445	7.70467	7.5196
10339134			0	2.46	5.50217		9.18222	9.33961	9.46425	9.54798	9.61217	7.13195	6.69821	7.244	6.76791	6.98526
10347193	Atic	5-aminoimidazole-4-carboxamide ribonucleotide formyltransferase/IMP cyclohydrolase	0	2.46	5.50217		11.8632	11.768	11.8566	11.4055	11.8686	9.4004	9.19034	9.22011	9.04407	9.61012
10381311	Wnk4	WNK lysine deficient protein kinase 4	0	2.46	5.50217		9.35607	9.11914	9.01867	9.76277	9.52873	6.84863	6.87439	6.85531	6.87655	7.05222
10415725	Spata13	spermatogenesis associated 13	0	2.46	5.50217		8.78728	8.7873	8.5347	8.94248	9.03771	6.20817	5.9615	6.36918	6.49155	6.73774
10415065	Lrp10	low-density lipoprotein receptor-related protein 10	0	2.45	5.46416		10.3693	10.3172	10.338	10.1902	10.369	7.87628	7.82441	7.76424	7.94983	7.90459
10604175	Fam70a	family with sequence similarity 70, member A	0	2.45	5.46416		12.4116	12.5304	12.5931	12.2837	12.4076	10.0341	10.0108	9.96996	9.97984	9.97789
10455942	A730017C20Rik	RIKEN cDNA A730017C20 gene	0	2.45	5.46416		9.91307	9.78434	9.7415	9.71269	9.74385	7.50962	7.24979	7.19286	7.26007	7.43435
10369453	X99384	cDNA sequence X99384	0	2.45	5.46416		9.8249	9.81994	9.81503	9.80624	9.90172	7.4154	7.25905	7.18307	7.5808	7.4612
10515156	Minpp1	multiple inositol polyphosphate histidine phosphatase 1	0	2.45	5.46416		10.9512	10.7885	10.9398	10.7564	10.8912	8.59556	8.25928	8.54208	8.33575	8.32295
10352234	Itpkb	inositol 1,4,5-trisphosphate 3-kinase B	0	2.45	5.46416		11.6167	11.6284	11.6071	11.7037	11.7756	9.1773	9.05251	9.07897	9.37667	9.39094
10389025	Myo1d	myosin ID	0	2.45	5.46416		10.5949	10.283	10.3945	10.4024	10.3737	8.1406	7.82795	7.74143	8.05602	8.02515
10466659	Gda	guanine deaminase	0	2.45	5.46416		8.70676	8.67684	8.70438	8.47381	8.40701	5.92552	6.08087	6.29748	6.13354	6.29627
10446473	Lama1	laminin, alpha 1	0	2.45	5.46416		9.78467	9.6712	9.67856	9.80866	9.77488	7.31843	7.00621	7.14752	7.47549	7.49822
10580010	Pkn1	protein kinase N1	0	2.45	5.46416		10.2211	9.97594	10.0858	10.2018	10.3688	7.89319	7.4782	7.58658	7.80559	7.86026
10339656			0	2.45	5.46416		10.8577	10.5743	10.5177	10.8813	10.8187	8.0682	8.2407	7.8176	8.60196	8.67757
10341057			0	2.45	5.46416		7.96922	7.91236	7.97177	8.28101	8.37394	5.95913	5.05568	5.2055	6.21795	5.80623
10344363			0	2.45	5.46416		7.50055	6.63317	7.24684	7.62354	7.2656	5.02259	3.73498	4.22207	5.55709	5.48929
10461856	Gna14	guanine nucleotide binding protein, alpha 14	0	2.44	5.42642		9.78094	9.95457	9.86914	9.94908	9.96332	7.40239	7.50009	7.49498	7.43929	7.45656
10491313	Cldn11	claudin 11	0	2.44	5.42642		12.2613	12.2873	12.3429	12.1871	12.224	9.92473	9.73488	9.81064	9.83473	9.77793
10500685	Atp1a1	ATPase, Na+/K+ transporting, alpha 1 polypeptide	0	2.44	5.42642		12.6685	12.5849	12.6378	12.6293	12.5999	10.3101	9.95775	10.0989	10.3058	10.2615
10489506	Spinlw1	serine protease inhibitor-like, with Kunitz and WAP domains 1 (eppin)	0	2.44	5.42642		12.2327	12.0605	12.0858	12.1807	12.1254	9.76218	9.54453	9.57981	9.9019	9.68785
10599822	4930550L24Rik	RIKEN cDNA 4930550L24 gene	0	2.44	5.42642		10.3577	10.2007	10.0815	10.318	10.2877	7.99415	7.7321	7.87784	7.704	7.73634
10344011			0	2.44	5.42642		12.5273	12.2507	12.2111	12.4084	12.1828	9.97145	9.76662	9.79058	9.87685	9.96426
10400718	Sos2	son of sevenless homolog 2 (Drosophila)	0	2.44	5.42642		10.4361	10.1894	10.3252	10.4343	10.3142	8.14339	7.79096	7.80815	7.88899	7.8582
10497237	Pag1	phosphoprotein associated with glycosphingolipid microdomains 1	0	2.44	5.42642		8.92742	8.93179	8.78596	8.75745	8.8054	6.65093	6.24201	6.26155	6.37936	6.49398
10419790	Jub	ajuba	0	2.44	5.42642		10.6236	10.4362	10.5891	10.3242	10.2058	8.06378	7.98436	8.08103	7.93287	7.93234
10383196			0	2.44	5.42642		8.98136	8.63379	8.81208	8.58225	8.58182	6.31705	6.2459	6.34441	6.33883	6.14742
10501832	Abcd3	ATP-binding cassette, sub-family D (ALD), member 3	0	2.44	5.42642		11.5245	11.3848	11.5346	11.2664	11.3745	9.16972	8.72208	8.9297	8.96811	9.07595
10575917	Wfdc1	WAP four-disulfide core domain 1	0	2.44	5.42642		10.5531	10.7341	10.5718	10.1513	10.3536	8.06083	8.06833	8.10937	7.84382	8.09019
10494322	Anp32e	acidic (leucine-rich) nuclear phosphoprotein 32 family, member E	0	2.44	5.42642		10.4016	10.1498	10.0867	10.0807	9.8324	7.91288	7.50152	7.75135	7.81804	7.37668
10436958	Clic6	chloride intracellular channel 6	0	2.44	5.42642		9.61465	9.14028	9.23536	9.52271	9.22924	7.17511	6.66696	6.75628	7.17834	6.78232
10559179	E330027M22Rik	RIKEN cDNA gene, E330027M22Rik	0	2.44	5.42642		9.2935	9.05403	9.1659	9.29372	9.42611	6.94735	6.50211	6.38859	7.02703	7.16052
10524941	Fbxo21	F-box protein 21	0	2.43	5.38893		12.7188	12.6031	12.6561	12.6182	12.5832	10.3317	10.0597	10.1332	10.2056	10.3048
10543319	Fam3c	family with sequence similarity 3, member C	0	2.43	5.38893		10.5373	10.4297	10.4933	10.4383	10.4718	8.10147	7.87032	7.98956	8.27868	7.96816
10383233	Rnf213	ring finger protein 213	0	2.43	5.38893		10.4014	10.2542	10.2711	10.1987	10.0765	7.90918	7.89635	7.82013	7.87345	7.56206
10561498	C330005M16Rik	RIKEN cDNA C330005M16 gene	0	2.43	5.38893		8.94668	8.74617	8.82889	8.99164	8.87392	6.46701	6.2581	6.34196	6.68902	6.4602
10432372	Dhh	desert hedgehog	0	2.43	5.38893		10.2331	10.1467	10.2258	10.0281	10.0066	7.87499	7.60245	7.64628	7.85591	7.49717
10409767	Golm1	golgi membrane protein 1	0	2.43	5.38893		8.95159	9.13202	9.08346	9.06822	9.07405	6.70964	6.27691	6.83532	6.71519	6.61755
10553967	Pcsk6	proprotein convertase subtilisin/kexin type 6	0	2.43	5.38893		9.82276	9.93164	9.68777	9.74629	10.0908	7.31074	7.43623	7.19033	7.57286	7.62224
10533285	Ptpn11	protein tyrosine phosphatase, non-receptor type 11	0	2.43	5.38893		10.8725	10.5739	10.5942	10.8557	10.6171	8.32806	7.96858	8.21634	8.47099	8.35983
10343752			0	2.43	5.38893		8.09731	8.34008	8.22971	8.56845	8.4264	5.88048	6.17812	5.72133	5.89357	5.84553
10462195	Kank1	KN motif and ankyrin repeat domains 1	0	2.43	5.38893		10.3848	10.0782	10.3721	10.0961	10.322	7.91489	7.43706	7.70347	8.01544	8.04038
10340406			0	2.43	5.38893		9.9083	9.51568	9.49963	10.089	10.1325	7.10925	6.93704	7.53987	7.80391	7.58621
10594110	Neo1	neogenin	0	2.42	5.35171		11.9967	11.9448	11.9395	11.9884	11.9363	9.57973	9.49128	9.41064	9.6187	9.607
10567043	Rras2	related RAS viral (r-ras) oncogene homolog 2	0	2.42	5.35171		11.6098	11.5865	11.5674	11.6921	11.6683	9.32161	9.10836	9.11934	9.26714	9.2084
10375313	Ccnjl	cyclin J-like	0	2.42	5.35171		9.283	9.2139	9.24218	9.2272	9.09906	6.88765	6.70618	6.64565	6.75286	6.95488
10347669	Inha	inhibin alpha	0	2.42	5.35171		12.707	12.5895	12.7173	12.5551	12.5562	10.3536	10.0375	10.1493	10.3843	10.1062
10468762	4930506M07Rik	RIKEN cDNA 4930506M07 gene	0	2.42	5.35171		10.0197	9.84676	9.94412	10.0117	10.0632	7.55602	7.47844	7.32431	7.64106	7.78345
10361323	Cnksr3	Cnksr family member 3	0	2.42	5.35171		10.2557	10.0763	10.1251	10.2496	10.108	7.82763	7.59255	7.5791	7.99843	7.72252
10544982	Nt5c3	5'-nucleotidase, cytosolic III	0	2.42	5.35171		10.0805	10.0674	10.1784	9.64995	10.0114	7.72603	7.45	7.77641	7.46491	7.45918
10537062	Mest	mesoderm specific transcript	0	2.42	5.35171		8.84489	9.00197	9.25627	8.54357	8.6426	6.53234	6.47472	6.55748	6.5106	6.10955
10341749			0	2.42	5.35171		10.6151	10.2629	10.0454	10.8177	10.6407	8.18164	7.88762	7.83616	8.15173	8.21513
10501208	Gstm6	glutathione S-transferase, mu 6	0	2.42	5.35171		11.6123	11.2463	11.1887	11.9046	11.6112	9.40531	8.59386	8.81524	9.53042	9.14247
10526410	Hspb1	heat shock protein 1	0	2.42	5.35171		10.6526	10.4108	10.58	11.4212	11.3929	8.53194	8.20572	8.19873	8.74511	8.69622
10440929	Gart	phosphoribosylglycinamide formyltransferase	0	2.41	5.31474		11.906	11.8039	11.7951	11.6566	11.6735	9.4617	9.30235	9.40289	9.29049	9.32625
10408741	Txndc5	thioredoxin domain containing 5	0	2.41	5.31474		11.2728	11.2944	11.2392	11.0749	11.1965	8.91493	8.76903	8.6457	8.82088	8.86957
10462822	Exoc6	exocyst complex component 6	0	2.41	5.31474		10.0897	10.1001	10.1906	10.0664	10.1655	7.78106	7.50037	7.68343	7.88588	7.72726
10383210			0	2.41	5.31474		9.12467	9.08565	9.15599	9.23394	9.16483	6.94149	6.70097	6.54308	6.7471	6.7819
10463462	Sfxn3	sideroflexin 3	0	2.41	5.31474		10.8037	10.8295	10.6474	10.6925	10.8788	8.37452	8.23302	8.16595	8.45243	8.56359
10357878	Adora1	adenosine A1 receptor	0	2.41	5.31474		10.6035	10.4959	10.4351	10.5446	10.4139	8.18806	7.85677	7.86556	8.26178	8.26426
10540472	Bhlhe40	basic helix-loop-helix family, member e40	0	2.41	5.31474		8.53993	8.42993	8.15628	8.33963	8.46935	6.46142	5.89928	5.90008	5.842	5.75839
10396485	Syne2	synaptic nuclear envelope 2	0	2.41	5.31474		10.5678	10.1605	10.2927	10.1484	10.3626	7.99248	7.51249	7.69409	8.10599	8.20038
10559509	Cdc42ep5	CDC42 effector protein (Rho GTPase binding) 5	0	2.41	5.31474		9.644	9.62472	9.67326	9.82156	10.0096	7.10864	7.17381	7.21628	7.84244	7.39953
10358389	Rgs2	regulator of G-protein signaling 2	0	2.41	5.31474		9.07554	8.92787	8.95807	9.34003	9.43272	6.80942	6.19458	6.5993	7.09634	6.99273
10361897	Ifngr1	interferon gamma receptor 1	0	2.4	5.27803		10.5484	10.4338	10.3894	10.343	10.4157	8.25324	8.0008	8.00742	8.05052	7.82877
10601314	Tsx	testis specific X-linked gene	0	2.4	5.27803		12.6418	12.5914	12.5014	12.701	12.7472	10.2699	10.0435	10.0228	10.3253	10.5172
10556598	Xylt1	xylosyltransferase 1	0	2.4	5.27803		9.44452	9.11807	9.21285	9.54358	9.42739	6.83777	6.88993	6.70143	7.22708	7.08442
10515378	Hpdl	4-hydroxyphenylpyruvate dioxygenase-like	0	2.4	5.27803		9.30427	9.18037	9.11637	8.70978	8.85618	6.88342	6.45778	6.64919	6.53918	6.64884
10428814	Anxa13	annexin A13	0	2.4	5.27803		8.49566	8.23821	8.42723	8.83234	8.39244	6.05353	5.7944	5.85689	6.39864	6.28032
10342229			0	2.4	5.27803		9.4499	9.12953	8.95026	9.37404	9.28672	7.01668	6.87258	6.51076	7.48027	6.29172
10431637	Cpne8	copine VIII	0	2.39	5.24157		8.38663	8.4885	8.59018	8.358	8.47926	6.06331	6.02692	6.14393	5.98519	6.15174
10549594	Ttyh1	tweety homolog 1 (Drosophila)	0	2.39	5.24157		11.4514	11.2268	11.2752	11.4002	11.3403	8.98931	8.86993	8.80565	9.05516	9.04161
10352725	Tmem206	transmembrane protein 206	0	2.39	5.24157		11.5551	11.4467	11.4557	11.386	11.4348	9.17513	8.82121	9.06581	9.21177	9.03164
10368289	Enpp1	ectonucleotide pyrophosphatase/phosphodiesterase 1	0	2.39	5.24157		8.83218	8.84974	8.805	8.69763	8.60111	6.44336	6.54493	6.29247	6.37029	6.17951
10536297	Ppp1r9a	protein phosphatase 1, regulatory (inhibitor) subunit 9A	0	2.39	5.24157		9.82024	9.66588	9.69507	9.7051	9.90619	7.39478	7.22877	7.23205	7.39248	7.6048
10583920	Eepd1	endonuclease/exonuclease/phosphatase family domain containing 1	0	2.39	5.24157		8.96405	8.89443	8.88019	9.04696	9.0219	6.62563	6.2916	6.52814	6.74122	6.65564
10603256			0	2.39	5.24157		10.3262	10.3504	10.3594	10.1052	10.1995	8.00844	7.63613	7.91766	7.79714	8.04401
10595560	Tbx18	T-box18	0	2.39	5.24157		8.95866	8.94034	8.8617	8.70033	8.64651	6.63301	6.53287	6.40488	6.22205	6.38973
10471424	Fam102a	family with sequence similarity 102, member A	0	2.39	5.24157		11.2927	11.0757	11.1469	11.4729	11.3318	8.72646	8.85561	8.69645	9.08765	9.01209
10575955	Klhl36	kelch-like 36 (Drosophila)	0	2.39	5.24157		10.7574	10.4933	10.6335	10.6832	10.6596	8.19677	8.01255	8.05454	8.45177	8.5422
10398019	Serpina5	serine (or cysteine) peptidase inhibitor, clade A, member 5	0	2.39	5.24157		12.5131	12.4316	12.4034	12.5323	12.5283	10.3977	9.85293	9.86289	10.2947	10.0737
10594840	Gcom1	GRINL1A complex locus	0	2.39	5.24157		9.30836	9.12955	9.29517	9.38932	9.46271	7.01822	6.47788	6.8757	7.10914	7.15437
10416004	Zfp395	zinc finger protein 395	0	2.39	5.24157		8.94519	8.95926	9.12627	9.47958	9.54108	6.62819	6.53591	6.72563	7.07807	7.14582
10604380	Zdhhc9	zinc finger, DHHC domain containing 9	0	2.39	5.24157		9.96835	9.72142	9.80629	10.2644	10.2618	7.57607	7.42284	7.23007	7.92544	7.92619
10375941	Vdac1	voltage-dependent anion channel 1	0	2.38	5.20537		11.0934	11.0373	11.1003	10.9878	11.1376	8.80122	8.56358	8.58756	8.70534	8.80587
10586844	Adam10	a disintegrin and metallopeptidase domain 10	0	2.38	5.20537		11.2019	11.2154	11.1748	11.0983	11.1357	8.88703	8.60756	8.61351	8.92572	8.88152
10432404	Tuba1a	tubulin, alpha 1A	0	2.38	5.20537		12.9996	13.0585	13.0855	12.816	13.0059	10.6064	10.399	10.6949	10.7226	10.656
10528548	Kcnh2	potassium voltage-gated channel, subfamily H (eag-related), member 2	0	2.38	5.20537		10.1562	9.9533	9.9583	10.2912	10.2133	7.73963	7.66098	7.67218	7.93519	7.67687
10499811	Npr1	natriuretic peptide receptor 1	0	2.38	5.20537		11.1768	11.0862	11.1666	11.3491	11.4292	8.90542	8.66888	8.77588	9.05365	8.9176
10366043	Dusp6	dual specificity phosphatase 6	0	2.38	5.20537		9.87129	10.1623	9.89568	9.82989	9.77947	7.79659	7.29694	7.47077	7.57567	7.47574
10528723	Mll3	myeloid/lymphoid or mixed-lineage leukemia 3	0	2.38	5.20537		9.95151	9.76612	9.72885	10.0347	9.98179	7.42866	7.34882	7.25035	7.72449	7.82115
10600017	Hmgb3	high mobility group box 3	0	2.38	5.20537		11.2524	10.9661	10.9438	11.329	11.2512	8.87459	8.44869	8.65702	8.99998	8.8765
10379401	Rnf135	ring finger protein 135	0	2.38	5.20537		9.84792	9.64683	9.57258	9.23006	9.43248	7.35024	7.09257	7.19538	7.26716	6.92875
10420891	Scara3	scavenger receptor class A, member 3	0	2.38	5.20537		8.83736	8.6913	9.17294	8.16356	8.6596	6.24484	6.43474	6.52632	6.06214	6.37664
10463476	Kazald1	Kazal-type serine peptidase inhibitor domain 1	0	2.38	5.20537		8.87834	8.96895	9.05405	7.65227	8.48729	6.56165	6.47414	6.50939	5.54785	6.04225
10472846	Pdk1	pyruvate dehydrogenase kinase, isoenzyme 1	0	2.37	5.16941		10.0236	9.91438	10.039	9.97684	10.105	7.63169	7.58368	7.58992	7.76721	7.62439
10561104	Axl	AXL receptor tyrosine kinase	0	2.37	5.16941		11.0189	10.9298	10.9729	10.9324	10.9412	8.66692	8.49212	8.44288	8.69189	8.6329
10464583	Gstp1	glutathione S-transferase, pi 1	0	2.37	5.16941		12.5241	12.4352	12.3763	12.4248	12.3777	10.2492	10.0496	9.94585	10.063	9.98886
10382152	Helz	helicase with zinc finger domain	0	2.37	5.16941		12.0488	11.7956	11.8877	11.9641	11.9558	9.54893	9.44888	9.44634	9.6559	9.7026
10460696	Slc25a45	solute carrier family 25, member 45	0	2.37	5.16941		11.3466	11.1793	11.2091	11.0254	11.059	8.91847	8.8082	8.6583	8.81288	8.77702
10452556	Rab12	RAB12, member RAS oncogene family	0	2.37	5.16941		10.637	10.3754	10.4901	10.5651	10.5943	8.28791	7.96393	8.06863	8.25782	8.23413
10366004	Atp2b1	ATPase, Ca++ transporting, plasma membrane 1	0	2.37	5.16941		10.9999	10.9981	11.096	10.8997	10.9563	8.66444	8.4481	8.42882	8.76134	8.78149
10408227	Hfe	hemochromatosis	0	2.37	5.16941		10.3237	10.3635	10.335	10.0178	10.0815	8.01949	7.81909	7.97947	7.69013	7.7549
10508961	Slc30a2	solute carrier family 30 (zinc transporter), member 2	0	2.37	5.16941		11.0352	11.221	11.1145	11.1203	11.2836	8.70435	8.60129	8.57549	8.95856	9.09853
10447294	Prkce	protein kinase C, epsilon	0	2.37	5.16941		9.2566	8.88905	9.02553	9.32693	9.33951	6.83066	6.49549	6.81065	6.9869	6.84308
10580033	Cd97	CD97 antigen	0	2.37	5.16941		9.95303	9.69137	9.53121	9.80625	9.30576	7.46924	7.08769	7.09279	7.47765	7.30486
10474419	Lgr4	leucine-rich repeat-containing G protein-coupled receptor 4	0	2.37	5.16941		10.3133	9.91959	10.0656	9.81873	9.64984	7.97134	7.4675	7.54287	7.58863	7.36433
10381154	Cnp	2',3'-cyclic nucleotide 3' phosphodiesterase	0	2.37	5.16941		9.81561	9.65137	9.75011	9.29425	9.35701	7.49288	7.2374	7.30785	7.16473	6.8143
10357158	Ralb	v-ral simian leukemia viral oncogene homolog B (ras related)	0	2.36	5.1337		11.245	11.0364	11.141	11.0359	11.0289	8.87761	8.52745	8.72497	8.77166	8.80224
10344017			0	2.36	5.1337		13.0401	12.9448	12.9056	12.8905	12.9405	10.6432	10.3157	10.5784	10.6975	10.6935
10362596	Fyn	Fyn proto-oncogene	0	2.36	5.1337		11.6999	11.4632	11.499	11.4412	11.4294	9.38019	9.05725	9.02468	9.16371	9.10645
10523772	Lrrc8d	leucine rich repeat containing 8D	0	2.36	5.1337		9.46703	9.30612	9.3372	9.00875	9.1595	6.90063	6.94507	6.93066	6.79392	6.89066
10506470	1700024P16Rik	RIKEN cDNA 1700024P16 gene	0	2.36	5.1337		9.98124	9.60693	9.67592	9.82191	9.82556	7.58166	7.22971	7.15614	7.54075	7.59814
10474950	Vps18	vacuolar protein sorting 18 (yeast)	0	2.36	5.1337		10.5803	10.5877	10.726	10.2459	10.4786	8.05462	8.01927	8.25233	8.05012	8.46701
10497421	Hps3	Hermansky-Pudlak syndrome 3 homolog (human)	0	2.36	5.1337		9.91038	9.84453	9.96273	9.50453	9.64523	7.60465	7.27207	7.32177	7.70108	7.18652
10587339	Gm10639	predicted gene 10639	0	2.36	5.1337		11.2476	10.8848	10.9107	10.9923	10.8989	9.03245	8.44214	8.53106	8.77013	8.37179
10340060			0	2.36	5.1337		9.70539	9.24433	9.21753	9.49931	9.191	7.18085	6.87736	6.78926	7.34178	6.85135
10342889			0	2.36	5.1337		7.75742	7.37325	7.61577	7.27124	7.18897	4.75039	4.45271	4.77393	5.79361	5.6218
10430596	Sun2	Sad1 and UNC84 domain containing 2	0	2.35	5.09824		10.6232	10.6182	10.6127	10.554	10.6398	8.28163	8.17318	8.15363	8.33781	8.3322
10489484	Sdc4	syndecan 4	0	2.35	5.09824		12.3457	12.2534	12.26	12.1327	12.2904	9.87579	9.76757	9.79905	10.0659	10.0114
10344141			0	2.35	5.09824		13.0293	12.9967	12.9924	12.9012	13.069	10.5374	10.3667	10.6869	10.7947	10.8545
10388834	Slc13a2	solute carrier family 13 (sodium-dependent dicarboxylate transporter), member 2	0	2.35	5.09824		9.02138	8.78413	8.78205	8.52813	8.60997	6.40267	6.48576	6.43226	6.22491	6.41024
10603266	Nudt10	nudix (nucleoside diphosphate linked moiety X)-type motif 10	0	2.35	5.09824		8.53979	8.0024	8.10758	8.54941	8.34159	5.7329	6.21168	5.89785	6.05803	5.9035
10595148	Gsta2	glutathione S-transferase, alpha 2 (Yc2)	0	2.35	5.09824		11.4236	11.0179	11.0837	11.0671	10.9814	9.15396	8.54376	8.66411	8.92844	8.55191
10546791	Sumf1	sulfatase modifying factor 1	0	2.34	5.06303		10.5878	10.4687	10.4588	10.564	10.5015	8.22689	7.98006	8.20135	8.2813	8.16709
10397054	Dcaf4	DDB1 and CUL4 associated factor 4	0	2.34	5.06303		11.0231	11.0269	11.0773	10.8493	10.916	8.74101	8.5332	8.50413	8.65623	8.75393
10606393	Brwd3	bromodomain and WD repeat domain containing 3	0	2.34	5.06303		9.8394	9.7509	9.77398	9.8812	9.88302	7.49315	7.35739	7.30401	7.67054	7.62639
10540408	Itpr1	inositol 1,4,5-triphosphate receptor 1	0	2.34	5.06303		10.5773	10.3903	10.3887	10.5444	10.5303	8.26998	7.92066	8.04565	8.28688	8.18941
10495651	Alg14	asparagine-linked glycosylation 14 homolog (yeast)	0	2.34	5.06303		9.67344	9.56642	9.36033	9.56719	9.42737	7.31898	6.97393	7.0993	7.28719	7.21552
10456184	Apcdd1	adenomatosis polyposis coli down-regulated 1	0	2.34	5.06303		10.0218	9.85753	9.78031	9.90742	9.58493	7.6024	7.43775	7.41176	7.58862	7.41293
10356240	Slc16a14	solute carrier family 16 (monocarboxylic acid transporters), member 14	0	2.34	5.06303		8.80609	9.19123	9.10549	8.87536	9.15264	6.54405	6.58901	6.83752	6.88184	6.58834
10475890	Mertk	c-mer proto-oncogene tyrosine kinase	0	2.34	5.06303		9.68762	9.79672	9.8299	9.59623	9.88806	7.25971	7.24509	7.29664	7.58206	7.69134
10587331	Gsta1	glutathione S-transferase, alpha 1 (Ya)	0	2.34	5.06303		11.4925	11.1299	11.1665	11.3983	11.2686	9.34336	8.6694	8.72963	9.22144	8.79975
10457733	B4galt6	UDP-Gal:betaGlcNAc beta 1,4-galactosyltransferase, polypeptide 6	0	2.33	5.02805		8.57711	8.59522	8.472	8.6234	8.51001	6.15273	6.34716	6.13017	6.28716	6.19661
10603387	Hdac6	histone deacetylase 6	0	2.33	5.02805		12.3982	12.3656	12.3727	12.2523	12.2624	10.1044	9.87717	9.94356	10.0809	9.97224
10570573	Agpat5	1-acylglycerol-3-phosphate O-acyltransferase 5 (lysophosphatidic acid acyltransferase, epsilon)	0	2.33	5.02805		10.1878	10.2102	10.1579	10.1162	10.2677	7.91501	7.70112	7.78999	7.87978	8.01197
10606837	Nxf3	nuclear RNA export factor 3	0	2.33	5.02805		12.2684	12.124	12.1881	12.1226	12.1215	10.0738	9.70078	9.82698	9.77874	9.77413
10545910	Pcyox1	prenylcysteine oxidase 1	0	2.33	5.02805		10.3659	10.4105	10.4473	10.1507	10.2089	8.07879	7.83497	7.93762	8.06799	8.00482
10377560	Sat2	spermidine/spermine N1-acetyl transferase 2	0	2.33	5.02805		10.4093	10.1957	10.1992	10.3856	10.2904	8.01652	7.77552	7.964	8.14838	7.93833
10350003	Cyb5r1	cytochrome b5 reductase 1	0	2.33	5.02805		11.3166	11.2709	11.1926	11.1351	11.2082	9.127	8.60578	8.91313	8.84637	8.98047
10499666	Atp8b2	ATPase, class I, type 8B, member 2	0	2.33	5.02805		11.0598	10.8647	10.8486	10.9562	10.9508	8.78638	8.53217	8.34036	8.78966	8.58544
10467206	Ppp1r3c	protein phosphatase 1, regulatory (inhibitor) subunit 3C	0	2.33	5.02805		8.57287	8.47657	8.27697	8.19205	8.18102	5.95536	6.13723	5.85737	6.13994	5.94597
10379184	Slc46a1	solute carrier family 46, member 1	0	2.33	5.02805		9.28425	9.64358	9.5582	9.21657	9.5605	6.91587	7.19397	7.13789	7.07649	7.27491
10369290	Ddit4	DNA-damage-inducible transcript 4	0	2.33	5.02805		10.1056	10.1461	9.56188	9.8306	9.64845	7.64564	7.42746	7.51488	7.7036	7.33544
10587323	Gsta1	glutathione S-transferase, alpha 1 (Ya)	0	2.33	5.02805		11.7512	11.3673	11.4069	11.624	11.4962	9.60407	8.90527	8.96584	9.46534	9.04722
10507933	Inpp5b	inositol polyphosphate-5-phosphatase B	0	2.32	4.99332		10.9678	10.8789	10.9996	10.8153	10.9872	8.75166	8.46482	8.66883	8.5977	8.55387
10491860	Phf17	PHD finger protein 17	0	2.32	4.99332		10.8032	10.761	10.7917	10.7371	10.9133	8.49893	8.32056	8.39894	8.5923	8.58771
10466410	Psat1	phosphoserine aminotransferase 1	0	2.32	4.99332		11.6027	11.5632	11.6202	11.4679	11.563	9.437	9.09579	9.2226	9.26773	9.17226
10458960	Aldh7a1	aldehyde dehydrogenase family 7, member A1	0	2.32	4.99332		12.1722	12.0048	12.1126	11.9925	12.0574	9.90424	9.55032	9.68066	9.77216	9.84507
10413086	Adk	adenosine kinase	0	2.32	4.99332		10.9048	10.7373	10.7648	10.7121	10.741	8.57672	8.20097	8.42922	8.50262	8.53952
10389022	Myo1d	myosin ID	0	2.32	4.99332		10.1432	9.84551	9.94618	9.87559	9.88354	7.68264	7.60264	7.49191	7.52054	7.78526
10500529	Phgdh	3-phosphoglycerate dehydrogenase	0	2.32	4.99332		10.3629	10.1425	10.3063	10.4251	10.5078	8.00897	8.01289	7.887	8.19195	8.05028
10558345	Dock1	dedicator of cytokinesis 1	0	2.32	4.99332		9.57484	9.47427	9.47928	9.51214	9.59026	7.28631	6.89696	7.1552	7.48499	7.22997
10476321	Prnd	prion protein dublet	0	2.32	4.99332		12.8495	12.7754	12.7863	13.0096	12.898	10.6156	10.2717	10.3989	10.8092	10.6316
10504606	Aldh1b1	aldehyde dehydrogenase 1 family, member B1	0	2.32	4.99332		9.44995	9.28424	9.36596	9.05409	8.9967	7.21264	6.71466	6.9972	6.89385	6.75106
10598626	Tspan7	tetraspanin 7	0	2.32	4.99332		9.37807	9.47209	9.43802	9.32098	9.6295	6.78624	7.15317	7.06192	7.08222	7.54471
10601846			0	2.32	4.99332		8.04558	7.93942	8.0111	8.43108	8.38069	5.97042	5.61214	5.49162	6.31219	5.81548
10602716	Ubqln2	ubiquilin 2	0	2.32	4.99332		9.06379	8.90972	8.95896	9.50313	9.53033	6.92681	6.66869	6.52243	7.27131	6.99859
10595953	Esyt3	extended synaptotagmin-like protein 3	0	2.31	4.95883		11.8286	11.8555	11.8898	11.6919	11.8045	9.53648	9.44207	9.49219	9.47774	9.5747
10605357	Gab3	growth factor receptor bound protein 2-associated protein 3	0	2.31	4.95883		7.93223	8.02019	7.97684	7.92244	8.12301	5.7708	5.69123	5.59633	5.72039	5.66309
10435212	Osbpl11	oxysterol binding protein-like 11	0	2.31	4.95883		11.398	11.3287	11.2986	11.3532	11.4408	9.1879	8.94002	9.03534	9.04668	9.07879
10370587	Shc2	SHC (Src homology 2 domain containing) transforming protein 2	0	2.31	4.95883		8.66856	8.57693	8.65699	8.60335	8.59008	6.14849	6.24451	6.33255	6.36326	6.46746
10572679	Glt25d1	glycosyltransferase 25 domain containing 1	0	2.31	4.95883		11.2034	11.0976	11.1895	11.3441	11.1902	8.94153	8.7846	8.79099	9.09874	8.86878
10567355	Gprc5b	G protein-coupled receptor, family C, group 5, member B	0	2.31	4.95883		11.1372	10.9079	10.9942	11.0752	11.0544	8.79615	8.67191	8.49151	8.82854	8.85264
10442155	Ppp2r1a	protein phosphatase 2 (formerly 2A), regulatory subunit A (PR 65), alpha isoform	0	2.31	4.95883		11.7491	11.7346	11.8523	11.9204	11.9778	9.50583	9.37848	9.40033	9.6675	9.73615
10387516	Shbg	sex hormone binding globulin	0	2.31	4.95883		10.0046	10.005	10.0514	9.84074	9.82208	7.7272	7.35376	7.61654	7.7624	7.73577
10471294	Ppapdc3	phosphatidic acid phosphatase type 2 domain containing 3	0	2.31	4.95883		8.98689	8.99099	8.92013	8.73512	8.8721	6.75775	6.26942	6.63038	6.6867	6.61741
10578649	Odz3	odd Oz/ten-m homolog 3 (Drosophila)	0	2.31	4.95883		10.4516	10.089	10.098	10.2033	10.2129	8.0049	7.81407	7.75924	8.12673	7.77817
10379176	Unc119	unc-119 homolog (C. elegans)	0	2.31	4.95883		11.5701	11.5114	11.4905	11.5484	11.6039	9.34037	8.96114	9.03568	9.40194	9.45556
10355864	Chpf	chondroitin polymerizing factor	0	2.3	4.92458		10.6435	10.5242	10.5618	10.5996	10.6456	8.30446	8.3087	8.15344	8.33299	8.38474
10396421	Hif1a	hypoxia inducible factor 1, alpha subunit	0	2.3	4.92458		10.9074	10.9193	10.8821	10.8055	10.8139	8.64631	8.46992	8.49009	8.72967	8.48335
10360227	Pea15a	phosphoprotein enriched in astrocytes 15A	0	2.3	4.92458		10.9046	10.876	10.9045	10.7816	10.8323	8.7436	8.57137	8.50538	8.55223	8.41494
10464251	Atrnl1	attractin like 1	0	2.3	4.92458		10.5773	10.5114	10.478	10.3807	10.5295	8.33756	8.15686	8.1252	8.07504	8.29981
10386495	Tom1l2	target of myb1-like 2 (chicken)	0	2.3	4.92458		10.4298	10.3503	10.4149	10.3999	10.5234	8.10799	7.94079	8.03387	8.29576	8.2517
10500140	Anxa9	annexin A9	0	2.3	4.92458		9.42791	9.66297	9.6711	9.40373	9.55571	7.20369	7.14581	7.14725	7.3373	7.37161
10464586	Gstp2	glutathione S-transferase, pi 2	0	2.3	4.92458		10.4599	10.3194	10.2238	10.106	10.1164	8.08472	7.95745	7.87031	7.97273	7.83251
10432540	Lima1	LIM domain and actin binding 1	0	2.3	4.92458		9.33843	9.39741	9.51795	9.3097	9.56761	7.31368	7.01654	7.0254	7.24893	7.02084
10601519	Klhl4	kelch-like 4 (Drosophila)	0	2.3	4.92458		8.13344	8.52394	8.32698	8.17072	8.13295	5.82959	5.90392	6.02119	5.97251	6.07842
10512165	Nol6	nucleolar protein family 6 (RNA-associated)	0	2.3	4.92458		10.6777	10.5172	10.5874	10.7698	10.8051	8.1663	8.33003	8.29787	8.54336	8.5062
10468869	Prdx3	peroxiredoxin 3	0	2.3	4.92458		11.9581	11.9354	11.9918	12.0266	11.9869	9.87031	9.50466	9.59545	9.95119	9.48393
10393106	Trim47	tripartite motif-containing 47	0	2.3	4.92458		9.69194	9.53858	9.53601	9.37982	9.52366	7.24978	6.97068	7.10385	7.45422	7.36813
10472598	Klhl23	kelch-like 23 (Drosophila)	0	2.3	4.92458		10.958	10.8172	10.7785	10.5922	10.5962	8.69945	8.36626	8.39733	8.52365	8.23741
10472050	Tnfaip6	tumor necrosis factor alpha induced protein 6	0	2.3	4.92458		7.50094	7.66348	7.79296	7.57829	7.84244	5.40118	5.50733	5.1704	5.18787	5.61395
10578539	Slc25a4	solute carrier family 25 (mitochondrial carrier, adenine nucleotide translocator), member 4	0	2.3	4.92458		12.4711	12.2141	12.312	12.5205	12.633	10.2444	9.85847	9.98862	10.2973	10.2669
10396606	Syne2	synaptic nuclear envelope 2	0	2.3	4.92458		10.8871	10.3709	10.6468	10.5898	10.7814	8.37481	8.21435	8.34138	8.18414	8.63643
10457054	Zadh2	zinc binding alcohol dehydrogenase, domain containing 2	0	2.3	4.92458		10.2519	10.1709	10.1935	9.8319	9.99083	8.12919	7.78612	7.76716	7.64245	7.6143
10444658	Clic1	chloride intracellular channel 1	0	2.3	4.92458		9.82922	9.81957	9.8176	10.3327	10.4569	7.62109	7.6952	7.59337	7.94568	7.88903
10462724			0	2.29	4.89056		11.3302	11.2435	11.2601	11.2497	11.2401	9.117	8.8447	8.88681	9.00121	9.03226
10560644	Pvrl2	poliovirus receptor-related 2	0	2.29	4.89056		10.773	10.7527	10.7456	10.8508	10.9006	8.59886	8.44522	8.41026	8.48727	8.62843
10569513	Osbpl5	oxysterol binding protein-like 5	0	2.29	4.89056		9.6605	9.74415	9.70436	9.66394	9.67796	7.44037	7.27093	7.25774	7.48846	7.55017
10600180	Atp2b3	ATPase, Ca++ transporting, plasma membrane 3	0	2.29	4.89056		9.31069	9.24465	9.14675	9.06934	9.28882	6.98528	6.92557	6.75419	6.97191	6.97467
10577757	Adam9	a disintegrin and metallopeptidase domain 9 (meltrin gamma)	0	2.29	4.89056		10.945	10.8143	10.9282	10.8635	10.8353	8.77113	8.48332	8.44782	8.63356	8.59925
10478594	Ctsa	cathepsin A	0	2.29	4.89056		10.1349	10.107	10.2253	10.0493	9.97766	7.88818	7.64468	7.77372	7.92277	7.81814
10361152	Gstp2	glutathione S-transferase, pi 2	0	2.29	4.89056		10.2079	10.0425	9.96072	9.86588	9.88424	7.82741	7.71539	7.60091	7.71687	7.64257
10370037	Mmp11	matrix metallopeptidase 11	0	2.29	4.89056		8.98561	9.01024	9.07892	8.99242	8.96189	6.6474	6.364	7.03947	6.76761	6.78065
10573483	Prdx2	peroxiredoxin 2	0	2.29	4.89056		10.4875	10.205	10.0778	10.1781	10.1225	8.10981	7.67594	7.75208	8.18574	7.87508
10396608	Syne2	synaptic nuclear envelope 2	0	2.29	4.89056		11.1338	10.6537	10.8415	10.6449	10.9446	8.60428	8.44032	8.55057	8.31851	8.87531
10458828	Cdo1	cysteine dioxygenase 1, cytosolic	0	2.29	4.89056		9.56638	9.4512	9.36139	9.88447	9.67006	7.40529	7.11806	7.23472	7.62156	7.10961
10462922	Plce1	phospholipase C, epsilon 1	0	2.29	4.89056		9.3304	9.3564	9.48056	9.4513	9.6784	6.85785	6.95933	7.23858	7.22452	7.54236
10361882	Nhsl1	NHS-like 1	0	2.29	4.89056		9.58865	9.37547	9.39777	9.815	9.83829	7.17434	7.18577	7.08329	7.61692	7.50528
10353750	Bag2	BCL2-associated athanogene 2	0	2.28	4.85678		9.18904	9.19254	9.05365	9.16692	9.29615	7.00142	6.85534	6.8219	6.89326	6.94268
10416082	Trim35	tripartite motif-containing 35	0	2.28	4.85678		11.534	11.4951	11.6281	11.3605	11.4903	9.30324	9.1923	9.13109	9.23831	9.26328
10602009	Rnf128	ring finger protein 128	0	2.28	4.85678		8.70599	8.68868	8.78061	8.61724	8.54453	6.34981	6.44737	6.46126	6.39768	6.26596
10542836	Klhdc5	kelch domain containing 5	0	2.28	4.85678		9.42357	9.19412	9.23765	8.97385	9.19555	7.01766	6.86509	6.9411	6.93566	6.88897
10444665	Ddah2	dimethylarginine dimethylaminohydrolase 2	0	2.28	4.85678		9.43408	9.48872	9.33477	9.34696	9.24822	7.17107	6.97079	7.32841	7.07762	6.91546
10355996	Slc25a5	solute carrier family 25 (mitochondrial carrier, adenine nucleotide translocator), member 5	0	2.28	4.85678		11.346	11.189	11.2115	11.155	11.0185	9.13575	8.7104	8.90078	8.92435	8.86047
10456587	Mro	maestro	0	2.28	4.85678		11.0909	10.8549	11.0018	11.1444	11.0215	8.86967	8.57067	8.55311	8.90181	8.79911
10393620	Cbx4	chromobox homolog 4 (Drosophila Pc class)	0	2.28	4.85678		10.1533	10.1742	10.2004	9.77634	9.84997	7.83071	7.75662	7.74584	7.75194	7.67279
10605766	Maged1	melanoma antigen, family D, 1	0	2.28	4.85678		12.1568	11.9864	12.065	12.2604	12.2722	9.88191	9.58305	9.80946	10.1409	9.91953
10574471	Cmtm3	CKLF-like MARVEL transmembrane domain containing 3	0	2.28	4.85678		11.0201	11.1866	11.0677	10.5973	10.7182	8.83155	8.62573	8.54708	8.46755	8.72306
10589994	Eomes	eomesodermin homolog (Xenopus laevis)	0	2.28	4.85678		8.29137	8.22758	8.23656	8.37326	7.96931	6.06566	6.11104	5.753	6.21775	5.56765
10573234	Lphn1	latrophilin 1	0	2.28	4.85678		10.8716	10.3705	10.4374	10.9202	10.7163	8.50074	8.09021	8.05031	8.64946	8.63007
10550417			0	2.28	4.85678		7.68349	7.37349	7.29351	8.37962	7.43053	5.50116	5.13756	4.73199	5.90108	5.47859
10381528	Nags	N-acetylglutamate synthase	0	2.27	4.82323		10.1454	10.0567	9.94077	10.1057	9.90743	7.79793	7.68057	7.71854	7.87979	7.71287
10346607	Fzd7	frizzled homolog 7 (Drosophila)	0	2.27	4.82323		8.87674	9.03964	8.8983	8.99529	9.05631	6.83447	6.58418	6.56475	6.73684	6.78851
10599192	Lonrf3	LON peptidase N-terminal domain and ring finger 3	0	2.27	4.82323		11.9008	11.705	11.751	11.7836	11.8495	9.63711	9.33719	9.46306	9.64491	9.57492
10502205	Hadh	hydroxyacyl-Coenzyme A dehydrogenase	0	2.27	4.82323		12.5899	12.5617	12.5631	12.6281	12.6781	10.4283	10.1188	10.2075	10.4403	10.4607
10587315	Gsta4	glutathione S-transferase, alpha 4	0	2.27	4.82323		12.706	12.6431	12.6358	12.6493	12.6176	10.4995	10.1103	10.3388	10.5498	10.3832
10370259	Col18a1	collagen, type XVIII, alpha 1	0	2.27	4.82323		9.1974	9.29011	9.58347	9.49913	9.65627	7.23142	7.15496	7.15376	7.06509	7.24616
10599215	Slc25a5	solute carrier family 25 (mitochondrial carrier, adenine nucleotide translocator), member 5	0	2.27	4.82323		11.7226	11.5827	11.5894	11.4164	11.3647	9.51124	9.09972	9.24556	9.23935	9.21757
10339653			0	2.27	4.82323		11.9279	11.6932	11.6433	11.6963	11.591	9.53205	9.36603	9.19146	9.61728	9.48172
10523479	Slc25a5	solute carrier family 25 (mitochondrial carrier, adenine nucleotide translocator), member 5	0	2.27	4.82323		11.6697	11.547	11.5491	11.3133	11.2831	9.49548	9.04796	9.21278	9.07905	9.19701
10587988	Gk5	glycerol kinase 5 (putative)	0	2.27	4.82323		9.84767	9.66157	9.80007	9.34105	9.44939	7.44934	7.21381	7.2377	7.48741	7.36872
10598638	Mid1ip1	Mid1 interacting protein 1 (gastrulation specific G12-like (zebrafish))	0	2.27	4.82323		10.5279	10.4057	10.3424	10.7432	10.7152	8.22391	8.13458	8.09036	8.59248	8.35084
10565437	Tmem135	transmembrane protein 135	0	2.27	4.82323		10.306	10.4219	10.4265	9.93089	10.0078	8.18639	7.83412	8.06881	7.82821	7.83893
10492231	Med12l	mediator of RNA polymerase II transcription, subunit 12 homolog (yeast)-like	0	2.27	4.82323		10.0696	9.64477	9.71245	10.1301	9.97631	7.65107	7.42626	7.41705	7.88483	7.80387
10570837	Slc20a2	solute carrier family 20, member 2	0	2.27	4.82323		11.0572	11.2085	11.2916	10.5315	10.8332	8.70275	8.86433	8.73613	8.57335	8.70101
10506883	Rab3b	RAB3B, member RAS oncogene family	0	2.27	4.82323		9.20282	8.74001	8.67101	9.18245	9.13419	6.79567	6.39878	6.71924	6.9451	6.72187
10584827	Mpzl2	myelin protein zero-like 2	0.003	2.27	4.82323		6.36776	8.83209	9.09296	9.23487	8.80574	5.14264	6.37901	6.45261	6.63697	6.37059
10598381	Gpkow	G patch domain and KOW motifs	0	2.26	4.78991		10.7051	10.6038	10.6985	10.4899	10.6176	8.35406	8.3537	8.40234	8.45686	8.25053
10445338	Enpp5	ectonucleotide pyrophosphatase/phosphodiesterase 5	0	2.26	4.78991		11.494	11.5104	11.4805	11.4109	11.4761	9.39788	9.12298	9.10667	9.259	9.16774
10541895	Tnfrsf1a	tumor necrosis factor receptor superfamily, member 1a	0	2.26	4.78991		10.8428	10.7727	10.7754	10.8432	10.7568	8.57872	8.44965	8.37673	8.69761	8.60383
10539017	Reep1	receptor accessory protein 1	0	2.26	4.78991		12.1712	12.0007	12.0288	12.0356	12.0148	9.94076	9.72755	9.64249	9.89124	9.75455
10577164	Gas6	growth arrest specific 6	0	2.26	4.78991		11.4486	11.4116	11.5226	11.4832	11.7471	9.28714	9.20433	9.12501	9.3578	9.35424
10605338	G6pdx	glucose-6-phosphate dehydrogenase X-linked	0	2.26	4.78991		10.9613	10.7989	10.8699	10.6178	10.8912	8.59261	8.38287	8.57155	8.65504	8.62701
10400170	Prkd1	protein kinase D1	0	2.26	4.78991		9.16985	8.85138	8.94156	9.08539	9.06525	6.87967	6.62548	6.60275	6.8154	6.88992
10472350	Gca	grancalcin	0	2.26	4.78991		12.2407	12.2851	12.3402	11.9462	12.0791	10.0172	9.91592	10.0054	9.78009	9.89261
10347310	Pnkd	paroxysmal nonkinesiogenic dyskinesia	0	2.26	4.78991		10.9939	10.8361	10.9081	10.9829	11.0885	8.78095	8.60954	8.47191	8.89692	8.75991
10498584			0	2.26	4.78991		9.09843	9.11868	9.15274	9.31195	9.44902	6.83532	6.8109	7.05869	7.14486	7.00257
10574480	Car7	carbonic anhydrase 7	0	2.26	4.78991		9.522	9.47004	9.45625	9.89832	9.4875	7.3652	7.14311	7.08872	7.53441	7.42619
10604542	Hs6st2	heparan sulfate 6-O-sulfotransferase 2	0	2.26	4.78991		7.3974	7.95137	7.79458	7.53124	7.83354	5.39206	5.38628	5.43686	5.31735	5.67831
10340219			0	2.26	4.78991		11.4684	11.2552	11.2814	11.4462	11.2404	8.99035	8.73562	8.98444	9.37626	9.31563
10436372	Dcbld2	discoidin, CUB and LCCL domain containing 2	0	2.25	4.75683		10.3014	10.3272	10.3024	10.2426	10.2524	8.12032	7.97265	7.96679	8.05348	8.07981
10606026	Zmym3	zinc finger, MYM-type 3	0	2.25	4.75683		11.4264	11.2959	11.3231	11.2511	11.357	9.15726	9.03906	9.04761	9.08014	9.07132
10499777	Ints3	integrator complex subunit 3	0	2.25	4.75683		11.194	11.0659	11.0486	11.0652	11.1198	8.85923	8.79758	8.75746	8.86677	8.94546
10585338	Kdelc2	KDEL (Lys-Asp-Glu-Leu) containing 2	0	2.25	4.75683		9.11329	9.07644	9.12659	8.88944	9.14994	6.72739	6.77214	6.91817	6.88711	6.82539
10483856	Prkra	protein kinase, interferon inducible double stranded RNA dependent activator	0	2.25	4.75683		10.4907	10.4422	10.3784	10.3255	10.2952	8.22258	7.91456	8.15901	8.16332	8.22566
10595033	Scg3	secretogranin III	0	2.25	4.75683		6.86563	7.14476	6.91602	7.1528	7.06732	4.5876	4.79854	4.81414	4.84554	4.84731
10470913	Pkn3	protein kinase N3	0	2.25	4.75683		8.22101	8.27484	8.39051	8.32707	8.40077	5.9683	6.03026	6.14146	5.86661	6.33879
10600973	Igbp1	immunoglobulin (CD79A) binding protein 1	0	2.25	4.75683		10.0034	10.0055	9.91219	10.0044	10.159	7.90954	7.60394	7.52028	7.90058	7.91736
10436945	Slc5a3	solute carrier family 5 (inositol transporters), member 3	0	2.25	4.75683		10.6823	10.4762	10.5705	10.2627	10.2399	8.12311	8.12186	8.14682	8.2416	8.34721
10377473	Aloxe3	arachidonate lipoxygenase 3	0	2.25	4.75683		9.30523	8.96695	9.11286	8.73644	8.84376	6.94581	6.64353	6.72095	6.58468	6.84201
10422760	Fyb	FYN binding protein	0	2.25	4.75683		9.25356	8.88498	8.90291	9.07282	9.36342	6.78258	6.63905	6.74619	7.31954	6.71758
10341845			0	2.25	4.75683		9.99685	10.2424	10.1919	10.3716	10.6541	7.91801	8.0174	7.70713	8.36572	8.18631
10529957	Gpr125	G protein-coupled receptor 125	0	2.24	4.72397		11.1719	11.0417	11.145	11.0302	11.0763	8.89743	8.9	8.7484	8.86862	8.85901
10575578	4930402E16Rik	RIKEN cDNA 4930402E16 gene	0	2.24	4.72397		11.2314	11.1099	11.1968	11.1521	11.1205	9.04876	8.79071	8.79641	9.09836	8.8932
10533182	Dtx1	deltex 1 homolog (Drosophila)	0	2.24	4.72397		10.7982	10.6081	10.7444	10.7527	10.8181	8.6632	8.41338	8.34212	8.53724	8.58174
10607639	Gja6	gap junction protein, alpha 6	0	2.24	4.72397		9.07168	9.04067	8.96651	9.09624	9.266	6.95793	6.74724	6.70974	6.86148	6.94948
10537770	Zyx	zyxin	0	2.24	4.72397		10.6862	10.4124	10.4806	10.5565	10.6424	8.37143	8.29362	8.10836	8.36576	8.43386
10401673	Tgfb3	transforming growth factor, beta 3	0	2.24	4.72397		9.60512	9.56782	9.39008	9.45398	9.50584	7.25139	6.99926	7.28902	7.36557	7.43572
10437687	Litaf	LPS-induced TN factor	0	2.24	4.72397		10.5203	10.4997	10.3646	10.2533	10.212	8.31536	7.98364	8.04592	8.09872	8.19112
10600688	Tab3	TGF-beta activated kinase 1/MAP3K7 binding protein 3	0	2.24	4.72397		10.4241	10.2492	10.3642	10.3946	10.3426	8.19887	7.96753	7.89175	8.32642	8.18902
10434758	St6gal1	beta galactoside alpha 2,6 sialyltransferase 1	0	2.24	4.72397		9.16379	9.12204	9.08542	9.03945	9.06771	6.99251	6.70142	6.61257	7.06187	6.90445
10364102	Chchd10	coiled-coil-helix-coiled-coil-helix domain containing 10	0	2.24	4.72397		11.6563	11.7481	11.7372	11.6465	11.6209	9.50862	9.12359	9.30487	9.69172	9.59791
10489246	Mafb	v-maf musculoaponeurotic fibrosarcoma oncogene family, protein B (avian)	0	2.24	4.72397		9.32269	9.18982	9.16726	9.56006	9.32758	7.14793	6.7428	7.05625	7.4193	7.00655
10391625	Ubtf	upstream binding transcription factor, RNA polymerase I	0	2.24	4.72397		10.8451	10.7612	10.7103	11.0908	11.111	8.55624	8.43701	8.45796	8.91028	8.94002
10478145	Ppp1r16b	protein phosphatase 1, regulatory (inhibitor) subunit 16B	0	2.24	4.72397		9.09641	8.65856	8.56501	9.13572	8.91422	6.68135	6.50173	6.38811	6.89942	6.68887
10371770	Gas2l3	growth arrest-specific 2 like 3	0	2.24	4.72397		8.86702	9.13099	9.1589	8.3286	8.54051	6.59282	6.48575	6.6292	6.64694	6.47474
10367611			0	2.24	4.72397		9.02641	8.33275	8.34235	8.80328	8.52229	6.69925	5.96925	5.93318	6.61429	6.61708
10380823	Lasp1	LIM and SH3 protein 1	0	2.23	4.69134		11.7456	11.6958	11.7992	11.7545	11.8187	9.60317	9.41815	9.39515	9.66609	9.55907
10487987	Lrrn4	leucine rich repeat neuronal 4	0	2.23	4.69134		8.83897	8.63556	8.64199	8.7177	8.71251	6.57338	6.37095	6.49786	6.59196	6.34086
10457273	Kif5b	kinesin family member 5B	0	2.23	4.69134		11.0176	10.8555	10.9879	10.8577	10.9148	8.87374	8.54284	8.62399	8.77114	8.69129
10466304	Dtx4	deltex 4 homolog (Drosophila)	0	2.23	4.69134		10.5977	10.325	10.4758	10.3649	10.4169	8.36967	8.14627	8.09374	8.19861	8.23079
10505512	Trim32	tripartite motif-containing 32	0	2.23	4.69134		10.0094	9.79191	9.82168	9.8915	9.64375	7.73346	7.54727	7.56103	7.56566	7.59493
10534531	Ywhag	tyrosine 3-monooxygenase/tryptophan 5-monooxygenase activation protein, gamma polypeptide	0	2.23	4.69134		10.8598	10.6648	10.6442	10.6668	10.7942	8.5923	8.40172	8.32724	8.64524	8.49115
10501199	Gstm7	glutathione S-transferase, mu 7	0	2.23	4.69134		12.5414	12.5961	12.6229	12.6578	12.7128	10.4142	10.2639	10.1882	10.5113	10.5953
10404402	Foxq1	forkhead box Q1	0	2.23	4.69134		9.40112	9.30113	9.35278	9.26261	9.33844	7.05929	7.23425	7.32356	6.84971	7.06048
10412607	Abhd6	abhydrolase domain containing 6	0	2.23	4.69134		11.2861	11.3119	11.3582	11.2953	11.3487	9.32436	8.98611	8.83295	9.18869	9.12318
10368888	Foxo3	forkhead box O3	0	2.23	4.69134		11.0206	10.9293	10.9418	10.828	10.9226	8.68355	8.45237	8.58062	8.93455	8.81943
10601980	Mum1l1	melanoma associated antigen (mutated) 1-like 1	0	2.23	4.69134		11.8322	11.7305	11.8637	11.6212	11.6606	9.70687	9.24149	9.51269	9.65708	9.45189
10599736	Fhl1	four and a half LIM domains 1	0	2.23	4.69134		10.1266	10.324	10.2617	9.89179	10.1987	7.77452	7.89276	7.93441	7.87633	8.16232
10563891	Nck2	non-catalytic region of tyrosine kinase adaptor protein 2	0	2.23	4.69134		10.5834	10.2609	10.3061	10.3193	10.4335	8.28187	8.13419	7.85699	8.32864	8.16786
10437364	Adcy9	adenylate cyclase 9	0	2.23	4.69134		9.10649	8.87941	8.68767	8.96908	9.00021	6.68081	6.49294	6.59149	6.82775	6.92028
10495896	Camk2d	calcium/calmodulin-dependent protein kinase II, delta	0	2.23	4.69134		9.41215	9.29621	8.85141	9.34197	8.98067	7.17039	6.7982	6.67213	7.25566	6.82754
10591960	Vps26b	vacuolar protein sorting 26 homolog B (yeast)	0	2.22	4.65893		10.8843	10.7913	10.7362	10.7329	10.6854	8.68	8.50445	8.49646	8.4739	8.56938
10435415	Sema5b	sema domain, seven thrombospondin repeats (type 1 and type 1-like), transmembrane domain (TM) and short cytoplasmic domain, (semaphorin) 5B	0	2.22	4.65893		11.3327	11.3165	11.3931	11.176	11.3262	9.04627	9.1716	9.12368	8.9515	9.16671
10349932	Etnk2	ethanolamine kinase 2	0	2.22	4.65893		11.5081	11.3388	11.4274	11.4144	11.3501	9.29598	9.07021	9.12468	9.30417	9.12447
10540679	Il17re	interleukin 17 receptor E	0	2.22	4.65893		9.47985	9.46608	9.59459	9.26753	9.44156	7.36529	7.1131	7.24591	7.16743	7.26771
10545538	Ctnna2	catenin (cadherin associated protein), alpha 2	0	2.22	4.65893		9.12638	9.303	9.25807	9.24574	9.4228	7.0707	7.0065	6.9091	6.98229	7.26388
10600921	Stard8	START domain containing 8	0	2.22	4.65893		9.83537	9.79715	9.67395	9.99566	9.96229	7.61725	7.57992	7.44099	7.81249	7.71907
10415991	Zfp395	zinc finger protein 395	0	2.22	4.65893		9.14134	9.02484	9.07173	9.49346	9.27316	6.94809	6.92223	6.88701	6.96863	7.16012
10400941	Dhrs7	dehydrogenase/reductase (SDR family) member 7	0	2.22	4.65893		10.7402	10.6855	10.5578	10.6909	10.6528	8.48071	8.09331	8.3915	8.65952	8.5892
10533529	Camkk2	calcium/calmodulin-dependent protein kinase kinase 2, beta	0	2.22	4.65893		10.4132	10.0695	10.1676	10.5578	10.4936	8.06605	8.05053	7.90724	8.35057	8.24599
10377087	Myh1	myosin, heavy polypeptide 1, skeletal muscle, adult	0	2.22	4.65893		7.06224	7.19407	7.35407	7.03668	7.27527	4.9041	4.69784	5.30206	4.78143	5.11734
10561721	Sipa1l3	signal-induced proliferation-associated 1 like 3	0	2.22	4.65893		10.8135	10.4774	10.4291	11.0288	10.9292	8.33332	8.39978	8.29994	8.796	8.75456
10453256	Kcng3	potassium voltage-gated channel, subfamily G, member 3	0	2.22	4.65893		9.09728	8.8265	8.72912	8.82769	8.68728	6.90398	6.61517	6.03579	6.69521	6.82204
10416023	Scara5	scavenger receptor class A, member 5 (putative)	0	2.21	4.62675		11.1311	11.0122	10.9285	11.0124	10.9632	8.84003	8.62618	8.82366	8.88158	8.83888
10551185	Tgfb1	transforming growth factor, beta 1	0	2.21	4.62675		10.0287	9.90153	9.77869	9.81361	9.84721	7.76284	7.69587	7.5156	7.66934	7.65192
10420616	Sgcg	sarcoglycan, gamma (dystrophin-associated glycoprotein)	0	2.21	4.62675		7.90676	7.9578	7.70932	7.835	7.74357	5.62288	5.77384	5.47744	5.66437	5.56194
10548097	9630033F20Rik	RIKEN cDNA 9630033F20 gene	0	2.21	4.62675		10.7435	10.661	10.5046	10.4853	10.5432	8.47285	8.54441	8.28862	8.24053	8.33527
10445033	Trim26	tripartite motif-containing 26	0	2.21	4.62675		9.77228	9.63328	9.59219	9.43637	9.45413	7.42277	7.14985	7.33939	7.54715	7.3792
10351769	Igsf8	immunoglobulin superfamily, member 8	0	2.21	4.62675		9.4389	9.33303	9.30894	9.47734	9.17385	7.29173	7.25091	6.87276	7.15975	7.09713
10530592	Fryl	furry homolog-like (Drosophila)	0	2.21	4.62675		11.124	10.7486	10.9165	11.1788	11.0649	8.87349	8.71053	8.69007	8.934	8.7867
10606083	Cited1	Cbp/p300-interacting transactivator with Glu/Asp-rich carboxy-terminal domain 1	0	2.21	4.62675		11.32	11.3277	11.2515	11.4857	11.5917	9.22999	8.97588	8.97917	9.52357	9.20634
10521824	Sod3	superoxide dismutase 3, extracellular	0	2.21	4.62675		8.73608	8.72226	8.7465	8.8345	8.7525	6.19516	6.60335	6.27986	6.89418	6.78564
10572897	Hmox1	heme oxygenase (decycling) 1	0	2.21	4.62675		9.99881	10.2445	10.0228	10.232	10.5534	7.75489	7.96891	7.75284	8.27468	8.25132
10586390	Rasl12	RAS-like, family 12	0	2.21	4.62675		9.13114	8.75771	8.86545	9.04408	9.28259	6.9858	6.452	6.55633	7.06481	6.96409
10485378	Prr5l	proline rich 5 like	0	2.21	4.62675		7.95719	7.39852	7.47756	7.75418	7.33704	5.50231	5.20466	5.58849	5.69641	4.88953
10341325			0	2.21	4.62675		7.79478	8.26802	8.15429	8.6297	8.86939	6.18873	6.28922	6.01849	6.05156	6.12866
10347980	Itm2c	integral membrane protein 2C	0	2.2	4.59479		11.8777	11.9372	11.8714	11.7536	11.8365	9.70055	9.61455	9.56886	9.6846	9.71417
10599581	2610018G03Rik	RIKEN cDNA 2610018G03 gene	0	2.2	4.59479		9.22927	9.17917	9.30919	9.21394	9.29315	7.16231	7.0565	6.96245	7.0039	7.04863
10582669	Ttc13	tetratricopeptide repeat domain 13	0	2.2	4.59479		9.98976	9.86616	9.90427	9.89875	9.7705	7.76964	7.5644	7.61241	7.76189	7.74006
10459210	Arhgef37	Rho guanine nucleotide exchange factor (GEF) 37	0	2.2	4.59479		8.24237	7.97457	7.92768	7.95392	8.07936	5.82427	5.68811	5.84026	5.88625	5.91827
10364093	Derl3	Der1-like domain family, member 3	0	2.2	4.59479		11.519	11.5226	11.6173	11.238	11.3694	9.27417	9.33019	9.21482	9.14227	9.29035
10604616	Plac1	placental specific protein 1	0	2.2	4.59479		9.42589	9.52673	9.4816	9.52906	9.2258	7.2709	7.26207	7.32972	7.28576	7.03147
10492699	Ctso	cathepsin O	0	2.2	4.59479		9.87035	9.79086	9.5842	9.86457	9.60939	7.75501	7.3267	7.583	7.59503	7.46381
10459089	Ndst1	N-deacetylase/N-sulfotransferase (heparan glucosaminyl) 1	0	2.2	4.59479		10.2394	9.96178	10.0946	10.33	10.2827	7.97754	7.84106	7.78299	8.16718	8.11536
10488646	Defb45	defensin beta 45	0	2.2	4.59479		9.14247	8.81665	8.69889	8.79521	8.7942	6.76493	6.46994	6.53782	6.85978	6.62579
10578904	Cpe	carboxypeptidase E	0	2.2	4.59479		12.2299	11.9903	12.0933	11.9754	12.0313	10.2376	9.62944	9.84558	9.81075	9.78523
10602474	Phf8	PHD finger protein 8	0	2.19	4.56305		11.3861	11.2462	11.3279	11.3413	11.352	9.13313	9.09053	9.13099	9.1717	9.17765
10438585	Tmem41a	transmembrane protein 41a	0	2.19	4.56305		10.6906	10.6817	10.7165	10.5766	10.5631	8.45548	8.51406	8.43337	8.49243	8.38392
10446084	Kdm4b	lysine (K)-specific demethylase 4B	0	2.19	4.56305		10.6178	10.5919	10.5022	10.4639	10.5655	8.34733	8.30888	8.28029	8.36028	8.48819
10497001	Cryz	crystallin, zeta	0	2.19	4.56305		10.2614	10.451	10.4016	10.1871	10.3656	8.253	8.09495	8.14452	8.06292	8.16607
10403303	Akr1c13	aldo-keto reductase family 1, member C13	0	2.19	4.56305		8.57686	8.4323	8.43636	8.58476	8.6515	6.39555	6.26449	6.34894	6.46954	6.27619
10469322	Vim	vimentin	0	2.19	4.56305		12.7741	12.7431	12.7444	12.7965	12.9113	10.7351	10.4392	10.568	10.6685	10.6268
10523766	Lrrc8c	leucine rich repeat containing 8 family, member C	0	2.19	4.56305		11.2037	11.0583	11.0217	10.9065	10.9219	8.93778	8.81812	8.77196	8.88257	8.76107
10383194			0	2.19	4.56305		9.55168	9.33303	9.36139	9.37895	9.23511	7.1799	7.19067	7.03453	7.26908	7.24035
10387014	Map2k4	mitogen-activated protein kinase kinase 4	0	2.19	4.56305		10.5362	10.3639	10.4837	10.3289	10.2898	8.38646	8.10546	8.23745	8.18664	8.11775
10432573	Slc11a2	solute carrier family 11 (proton-coupled divalent metal ion transporters), member 2	0	2.19	4.56305		11.261	11.3084	11.1815	10.9842	11.0893	8.94744	8.89267	8.88384	9.01642	9.12269
10607694	Syap1	synapse associated protein 1	0	2.19	4.56305		10.6915	10.4992	10.5171	10.5853	10.6355	8.64037	8.27877	8.41607	8.35559	8.27463
10505894	Mtap	methylthioadenosine phosphorylase	0	2.19	4.56305		8.75298	8.57585	8.75113	8.66345	8.71002	6.5726	6.29113	6.43472	6.74362	6.43835
10400844	Pygl	liver glycogen phosphorylase	0	2.19	4.56305		8.7775	8.81788	8.87432	8.8637	8.64265	6.56103	6.41537	6.51082	6.83553	6.68614
10532346	P2rx2	purinergic receptor P2X, ligand-gated ion channel, 2	0	2.19	4.56305		11.5352	11.2338	11.3592	11.5222	11.235	9.3732	9.15042	9.04131	9.30294	9.05542
10476924	Cst9	cystatin 9	0	2.19	4.56305		12.7374	12.6472	12.5866	12.8459	12.8179	10.6135	10.2884	10.3844	10.6954	10.6844
10539143	Retsat	retinol saturase (all trans retinol 13,14 reductase)	0	2.19	4.56305		10.3181	10.2489	10.0861	10.1548	9.99265	8.13233	7.72581	7.88581	8.13942	7.95984
10408450	Sox4	SRY-box containing gene 4	0	2.19	4.56305		9.05723	9.21046	9.04456	9.25258	9.24569	6.94845	6.84221	6.67988	7.16895	7.21293
10496475	Adh5	alcohol dehydrogenase 5 (class III), chi polypeptide	0	2.19	4.56305		11.0646	10.8551	10.9045	11.2065	11.1304	8.97797	8.5587	8.79256	9.07398	8.82723
10424082	Aard	alanine and arginine rich domain containing protein	0	2.19	4.56305		12.6217	12.5736	12.5113	12.7637	12.7877	10.593	10.1312	10.2228	10.7075	10.6618
10598674			0	2.19	4.56305		9.36368	9.45997	9.15483	9.43884	9.66523	7.32545	6.77657	7.14856	7.53829	7.36295
10440491	App	amyloid beta (A4) precursor protein	0	2.18	4.53154		12.3947	12.5352	12.4786	12.2469	12.4217	10.2036	10.213	10.2771	10.2231	10.2442
10445241	Tnfrsf21	tumor necrosis factor receptor superfamily, member 21	0	2.18	4.53154		8.99767	9.04926	9.04047	9.0869	9.15454	6.84782	6.81542	6.80478	6.93945	7.0353
10476301	Smox	spermine oxidase	0	2.18	4.53154		10.2677	10.0921	10.1658	10.1379	10.3089	8.08142	7.92945	8.06579	7.90281	8.07958
10514668	Jak1	Janus kinase 1	0	2.18	4.53154		11.7046	11.7182	11.7122	11.5774	11.6522	9.58064	9.35265	9.36943	9.58232	9.55491
10562260	Gramd1a	GRAM domain containing 1A	0	2.18	4.53154		10.3246	10.2965	10.2878	10.2518	10.2453	8.17466	7.9361	7.93292	8.23298	8.22531
10565815			0	2.18	4.53154		11.0465	11.0444	11.0653	10.7609	10.7269	8.78715	8.75037	8.77517	8.7544	8.69827
10431894	Slc38a2	solute carrier family 38, member 2	0	2.18	4.53154		11.7952	11.7386	11.6991	11.5714	11.5224	9.70232	9.46301	9.36751	9.47504	9.40083
10528227	Gnai1	guanine nucleotide binding protein (G protein), alpha inhibiting 1	0	2.18	4.53154		10.6752	10.5967	10.6833	10.3282	10.3673	8.40076	8.38819	8.35362	8.30131	8.30568
10468533	Gpam	glycerol-3-phosphate acyltransferase, mitochondrial	0	2.18	4.53154		11.0509	10.8524	10.9006	10.6646	10.697	8.84992	8.52981	8.56855	8.65268	8.66856
10360205	Ncstn	nicastrin	0	2.18	4.53154		11.8287	11.8638	11.9436	11.9407	12.0002	9.61319	9.5812	9.53177	9.9087	10.0388
10476314	Prnp	prion protein	0	2.18	4.53154		10.7534	10.6509	10.5178	10.5421	10.2998	8.66226	8.19519	8.31391	8.46278	8.24989
10598493	Pcsk1n	proprotein convertase subtilisin/kexin type 1 inhibitor	0	2.18	4.53154		11.249	11.095	11.1885	10.5878	10.8361	8.93837	8.83388	8.91239	8.60919	8.78305
10558866	Drd4	dopamine receptor D4	0	2.18	4.53154		10.5808	10.3485	10.5988	10.2721	10.0594	8.38319	7.86381	8.05892	8.33338	8.33123
10490370	Psma7	proteasome (prosome, macropain) subunit, alpha type 7	0	2.18	4.53154		10.4602	10.2588	10.3017	10.5829	10.6376	8.15596	7.8549	8.15524	8.67289	8.50467
10521950	Stim2	stromal interaction molecule 2	0	2.17	4.50023		10.3761	10.3592	10.4001	10.2883	10.3523	8.32594	8.16616	8.11843	8.1538	8.1677
10438530	Clcn2	chloride channel 2	0	2.17	4.50023		10.8189	10.8108	10.8711	10.8227	10.8989	8.77517	8.48449	8.56531	8.71294	8.81549
10604038	Srsf17b	serine/arginine-rich splicing factor 17B	0	2.17	4.50023		8.85607	8.7815	8.6865	8.69781	8.97726	6.66325	6.53381	6.50687	6.76223	6.68647
10601888	Plp1	proteolipid protein (myelin) 1	0	2.17	4.50023		10.79	10.9329	11.0008	10.6479	10.7014	8.73393	8.64541	8.59424	8.57803	8.66289
10441038	Hlcs	holocarboxylase synthetase (biotin- [propriony-Coenzyme A-carboxylase (ATP-hydrolysing)] ligase)	0	2.17	4.50023		8.94075	8.90169	8.7615	8.97054	8.68395	6.72716	6.6096	6.61048	6.88189	6.60176
10362073	Sgk1	serum/glucocorticoid regulated kinase 1	0	2.17	4.50023		9.02918	8.7715	8.64178	8.75851	8.78846	6.66401	6.44788	6.60425	6.88112	6.55069
10489723	Zmynd8	zinc finger, MYND-type containing 8	0	2.17	4.50023		9.16722	9.01135	8.82885	9.11294	8.98799	7.08831	6.60869	6.67717	6.92455	6.93574
10346651	Bmpr2	bone morphogenic protein receptor, type II (serine/threonine kinase)	0	2.17	4.50023		10.1127	9.80052	9.82614	10.1521	10.1152	7.90189	7.61939	7.61673	8.09833	7.90736
10584883	Fxyd6	FXYD domain-containing ion transport regulator 6	0	2.17	4.50023		11.8071	11.8906	11.88	12.1378	12.1339	9.92312	9.44386	9.74787	9.91747	9.99059
10462136	Cycs	cytochrome c, somatic	0	2.17	4.50023		11.5834	11.2828	11.3025	11.6998	11.6181	9.39773	9.02591	9.20221	9.67249	9.34874
10368918	Sobp	sine oculis-binding protein homolog (Drosophila)	0	2.17	4.50023		9.25264	8.70976	8.79138	9.32848	9.31952	6.78132	6.89889	6.76583	7.11809	6.97795
10345666	Pdcl3	phosducin-like 3	0	2.17	4.50023		8.61935	8.55435	8.40205	9.05631	8.95073	6.53221	6.28233	6.36923	6.85085	6.68653
10353135	Ncoa2	nuclear receptor coactivator 2	0	2.16	4.46915		11.7587	11.6344	11.6364	11.7148	11.7208	9.50309	9.49773	9.41312	9.64932	9.61823
10605740	Eif2s3x	eukaryotic translation initiation factor 2, subunit 3, structural gene X-linked	0	2.16	4.46915		10.2437	10.3067	10.3919	10.2295	10.3401	8.2402	7.98012	8.10574	8.31125	8.08212
10605666	Mageb18	melanoma antigen family B, 18	0	2.16	4.46915		6.84276	6.782	6.56792	6.8947	6.90537	4.67282	4.71923	4.71377	4.46037	4.61693
10481056	Notch1	Notch gene homolog 1 (Drosophila)	0	2.16	4.46915		9.25106	9.05852	9.02515	9.41394	9.15261	7.06584	6.91515	7.00854	7.12317	7.01164
10562576	Plekhf1	pleckstrin homology domain containing, family F (with FYVE domain) member 1	0	2.16	4.46915		8.95246	8.69019	8.76549	8.86867	9.06099	6.79569	6.64985	6.53468	6.88004	6.69643
10590060	Ctdspl	CTD (carboxy-terminal domain, RNA polymerase II, polypeptide A) small phosphatase-like	0	2.16	4.46915		9.76617	9.44068	9.5554	9.68529	9.57419	7.52565	7.51391	7.16088	7.53871	7.48537
10532926	Acads	acyl-Coenzyme A dehydrogenase, short chain	0	2.16	4.46915		10.4147	10.3903	10.3557	10.0203	10.1567	8.24783	7.99688	8.08821	7.99669	8.18568
10605195	Hcfc1	host cell factor C1	0	2.16	4.46915		10.378	10.1847	10.2647	10.4482	10.5117	8.10733	8.06348	8.06932	8.39757	8.3525
10569733	Arhgef18	rho/rac guanine nucleotide exchange factor (GEF) 18	0	2.16	4.46915		9.80467	9.71258	9.72137	10.1142	10.0615	7.58071	7.63152	7.68714	7.88857	7.83433
10399691	Id2	inhibitor of DNA binding 2	0	2.16	4.46915		9.42939	9.51525	9.52796	9.19812	9.71537	7.4569	7.1263	7.4694	7.26058	7.28507
10526055	Gbas	glioblastoma amplified sequence	0	2.16	4.46915		11.3076	10.9746	10.9412	11.1919	11.1555	9.16464	8.67289	8.80033	9.18969	8.93896
10407124			0	2.16	4.46915		7.04005	6.73326	6.65922	7.2994	6.59583	4.7597	4.93366	4.62288	4.79835	4.41884
10403361	Pitrm1	pitrilysin metallepetidase 1	0	2.15	4.43828		10.6357	10.6389	10.7237	10.5894	10.5731	8.53101	8.41266	8.49132	8.53549	8.44984
10503835	Rragd	Ras-related GTP binding D	0	2.15	4.43828		9.62595	9.42144	9.38624	9.54503	9.4663	7.34708	7.42528	7.30353	7.28036	7.34839
10351563	B4galt3	UDP-Gal:betaGlcNAc beta 1,4-galactosyltransferase, polypeptide 3	0	2.15	4.43828		10.0616	9.92949	10.0607	9.81506	10.0273	7.8329	7.80702	7.83356	7.92702	7.76437
10535559	Baiap2l1	BAI1-associated protein 2-like 1	0	2.15	4.43828		9.27509	9.38614	9.37842	9.18534	9.41239	7.31489	7.14835	7.14943	7.20983	7.08523
10446376	Man2a1	mannosidase 2, alpha 1	0	2.15	4.43828		12.0275	11.9631	11.9801	11.9639	12.0592	9.92243	9.75182	9.72654	10.0199	9.82796
10454310	Galnt1	UDP-N-acetyl-alpha-D-galactosamine:polypeptide N-acetylgalactosaminyltransferase 1	0	2.15	4.43828		10.7361	10.5175	10.6165	10.4499	10.4965	8.59701	8.46021	8.42148	8.30199	8.27452
10419803	4931414P19Rik	RIKEN cDNA 4931414P19 gene	0	2.15	4.43828		8.25333	8.16076	8.34214	8.22297	7.94857	6.0298	5.97861	6.02529	6.20017	5.95466
10602372	Alas2	aminolevulinic acid synthase 2, erythroid	0	2.15	4.43828		10.3959	10.485	10.5629	10.3135	10.59	8.36643	8.15683	8.31319	8.23853	8.51266
10431424	Plxnb2	plexin B2	0	2.15	4.43828		11.6906	11.3962	11.4316	11.5941	11.7022	9.42851	9.28589	9.27943	9.54585	9.5434
10566529	Tpp1	tripeptidyl peptidase I	0	2.15	4.43828		9.69659	9.6692	9.62888	9.39635	9.41999	7.61671	7.43691	7.20844	7.38832	7.3929
10530563	Fryl	furry homolog-like (Drosophila)	0	2.15	4.43828		10.2477	9.96859	10.0166	10.2385	10.1203	7.91525	7.78606	7.89006	8.19302	8.06977
10599686	Zfp449	zinc finger protein 449	0	2.15	4.43828		7.63386	7.69124	7.57385	7.4922	7.93502	5.62057	5.18611	5.47128	5.58859	5.69423
10495781	Bcar3	breast cancer anti-estrogen resistance 3	0	2.15	4.43828		9.84044	9.63035	9.51116	9.90545	9.76805	7.44454	7.41383	7.44392	7.70255	7.90592
10365601	Gnptab	N-acetylglucosamine-1-phosphate transferase, alpha and beta subunits	0	2.14	4.40762		10.75	10.593	10.6203	10.5726	10.5542	8.62151	8.41137	8.40096	8.45636	8.48157
10588466	Twf2	twinfilin, actin-binding protein, homolog 2 (Drosophila)	0	2.14	4.40762		9.48976	9.5299	9.42893	9.68861	9.59969	7.2941	7.22586	7.38255	7.6011	7.51853
10580349	Mylk3	myosin light chain kinase 3	0	2.14	4.40762		8.17641	8.03409	8.07931	7.95334	8.11755	5.68374	5.88663	6.13276	5.92144	6.04583
10403352	Klf6	Kruppel-like factor 6	0	2.14	4.40762		8.96137	8.9029	8.78729	9.10053	9.14866	6.99767	6.58723	6.7093	7.0643	6.82816
10524874	Vsig10	V-set and immunoglobulin domain containing 10	0	2.14	4.40762		9.7694	9.68082	9.53864	9.99931	10.1374	7.59438	7.62439	7.51305	7.87207	7.79921
10528170	Cycs	cytochrome c, somatic	0	2.14	4.40762		11.91	11.6384	11.6757	12.0251	11.8362	9.62973	9.34058	9.54694	10.1599	9.68829
10561837	Zfp146	zinc finger protein 146	0	2.13	4.37717		9.95332	9.88606	9.84316	9.91423	9.96388	7.86327	7.67341	7.75668	7.85499	7.78473
10491279	Prkci	protein kinase C, iota	0	2.13	4.37717		11.4761	11.4382	11.4648	11.3093	11.3202	9.37371	9.30005	9.17596	9.26847	9.23484
10599976	Mtm1	X-linked myotubular myopathy gene 1	0	2.13	4.37717		9.48984	9.48908	9.53225	9.3796	9.53981	7.47708	7.30541	7.22688	7.48909	7.27037
10581197	Exoc3l	exocyst complex component 3-like	0	2.13	4.37717		9.88662	9.88836	9.83326	9.87717	10.0916	7.74776	7.81591	7.65557	7.91357	7.78847
10601164	Nono	non-POU-domain-containing, octamer binding protein	0	2.13	4.37717		10.9851	10.9937	10.9609	10.9747	11.0641	8.87322	8.67366	8.78191	8.98942	9.02236
10437376	Srl	sarcalumenin	0	2.13	4.37717		9.57904	9.48886	9.1447	9.43317	9.30483	7.29377	7.1416	7.25975	7.30573	7.3067
10446537	L3mbtl4	l(3)mbt-like 4 (Drosophila)	0	2.13	4.37717		9.93435	9.88673	9.82	10.0312	9.9733	7.92043	7.63115	7.61134	7.92018	7.93734
10369413	Sgpl1	sphingosine phosphate lyase 1	0	2.13	4.37717		11.7476	11.7534	11.7702	11.3895	11.4848	9.69756	9.4971	9.51739	9.35157	9.41457
10568873	Adam8	a disintegrin and metallopeptidase domain 8	0	2.13	4.37717		8.76365	8.71487	8.80743	8.71601	8.27007	6.59593	6.49201	6.42205	6.74289	6.35459
10542310	Cdkn1b	cyclin-dependent kinase inhibitor 1B	0	2.13	4.37717		9.54859	9.49187	9.45305	9.81384	9.91994	7.44439	7.34659	7.48572	7.79106	7.52004
10487154	Secisbp2l	SECIS binding protein 2-like	0	2.13	4.37717		10.0111	9.83372	9.89572	10.2335	10.0723	7.94825	7.70524	7.60883	8.20509	7.92756
10513608	Alad	aminolevulinate, delta-, dehydratase	0	2.13	4.37717		11.9799	11.9628	12.2585	11.9433	12.3431	9.81765	9.70454	10.0524	9.94292	10.3397
10410919	Gm5666	predicted gene 5666	0	2.13	4.37717		6.36258	6.09112	6.15456	6.5623	6.6853	4.15052	4.27586	4.0577	4.57727	4.14528
10368675	Marcks	myristoylated alanine rich protein kinase C substrate	0	2.13	4.37717		10.714	10.685	10.5562	11.0564	10.9941	8.67673	8.42475	8.43209	9.00317	8.81799
10366052	Kitl	kit ligand	0	2.13	4.37717		9.32033	9.09096	9.12746	9.56021	9.5455	7.30435	6.89736	6.82376	7.60933	7.34287
10578361	Asah1	N-acylsphingosine amidohydrolase 1	0	2.13	4.37717		11.2846	10.9404	11.141	11.3069	11.0763	9.39061	8.60662	8.80535	9.44954	8.85088
10431802	Twf1	twinfilin, actin-binding protein, homolog 1 (Drosophila)	0	2.12	4.34694		11.6823	11.4816	11.5889	11.5719	11.5267	9.60075	9.46495	9.36879	9.39664	9.42047
10585286	Arhgap20	Rho GTPase activating protein 20	0	2.12	4.34694		11.4751	11.3311	11.435	11.5843	11.5467	9.33586	9.33501	9.27818	9.364	9.46898
10536818	Calu	calumenin	0	2.12	4.34694		11.8007	11.6925	11.7774	11.5784	11.6145	9.63106	9.46587	9.51209	9.66621	9.61088
10482237	Nr5a1	nuclear receptor subfamily 5, group A, member 1	0	2.12	4.34694		10.1825	10.1146	10.164	10.1994	10.3129	8.17982	7.92635	7.98392	8.09544	8.17507
10392347	Pitpnc1	phosphatidylinositol transfer protein, cytoplasmic 1	0	2.12	4.34694		9.51127	9.55686	9.43932	9.24464	9.44319	7.40295	7.24206	7.24373	7.34198	7.36019
10555892	Twf1	twinfilin, actin-binding protein, homolog 1 (Drosophila)	0	2.12	4.34694		11.6914	11.4082	11.5142	11.6272	11.542	9.56293	9.33846	9.39058	9.48165	9.40514
10365297	D10Wsu102e	DNA segment, Chr 10, Wayne State University 102, expressed	0	2.12	4.34694		10.8889	10.7964	10.8762	10.8078	10.8101	8.79966	8.48119	8.78491	8.68474	8.84679
10476276	Mavs	mitochondrial antiviral signaling protein	0	2.12	4.34694		10.454	10.648	10.5689	10.3901	10.6386	8.49204	8.32666	8.28459	8.52635	8.4605
10382980	Syngr2	synaptogyrin 2	0	2.12	4.34694		11.4239	11.5345	11.509	11.2281	11.5197	9.40591	9.23169	9.33435	9.2268	9.41323
10515590	Kdm4a	lysine (K)-specific demethylase 4A	0	2.12	4.34694		11.1471	11.1414	11.1527	11.2922	11.3161	9.15366	8.94081	8.93774	9.26157	9.14839
10380260	Trim25	tripartite motif-containing 25	0	2.12	4.34694		9.16968	9.05108	9.11861	8.94994	8.99879	7.1573	6.84535	6.93313	6.98387	6.78707
10562532	Zfp536	zinc finger protein 536	0	2.12	4.34694		8.06738	7.84158	7.92138	8.0739	7.91135	5.88942	5.63861	5.77337	6.03004	5.86004
10401473	Aldh6a1	aldehyde dehydrogenase family 6, subfamily A1	0	2.12	4.34694		11.5971	11.7035	11.6846	11.4977	11.6254	9.73305	9.36108	9.35299	9.593	9.47546
10561702	Kcnk6	potassium inwardly-rectifying channel, subfamily K, member 6	0	2.12	4.34694		9.74802	9.67362	9.47563	9.68925	9.38875	7.63347	7.41744	7.49199	7.38137	7.44322
10369877	Ube2d1	ubiquitin-conjugating enzyme E2D 1, UBC4/5 homolog (yeast)	0	2.12	4.34694		9.84728	9.7902	9.86019	10.1859	10.1175	7.87857	7.94583	7.75986	7.84628	7.79211
10343739			0	2.12	4.34694		12.4259	12.5813	12.5298	12.2121	12.4376	10.4441	10.3682	10.3004	10.3789	10.0973
10340566			0	2.12	4.34694		8.57719	8.43284	8.58799	8.49167	8.67441	6.48641	6.18028	6.65803	6.44041	6.3911
10571530	Fat1	FAT tumor suppressor homolog 1 (Drosophila)	0	2.12	4.34694		9.94159	9.60704	9.66895	9.7967	10.0113	7.7896	7.57617	7.54179	7.89786	7.64134
10568939	Echs1	enoyl Coenzyme A hydratase, short chain, 1, mitochondrial	0	2.12	4.34694		10.5489	10.3756	10.4139	10.3167	10.4995	8.40016	8.01719	8.12445	8.46035	8.55743
10416887	Slain1	SLAIN motif family, member 1	0	2.12	4.34694		9.62678	9.55114	9.70802	9.76272	9.78433	7.57224	7.26404	7.51278	7.93203	7.54796
10445293	Pla2g7	phospholipase A2, group VII (platelet-activating factor acetylhydrolase, plasma)	0	2.12	4.34694		11.9225	11.8825	11.8275	11.736	11.6164	9.95388	9.72338	9.77688	9.67048	9.26903
10492335	Rap2b	RAP2B, member of RAS oncogene family	0	2.12	4.34694		9.42427	9.30174	9.10924	9.72272	9.52279	7.25174	7.15484	7.10764	7.55143	7.43932
10453141	Sos1	son of sevenless homolog 1 (Drosophila)	0	2.12	4.34694		9.79744	9.58182	9.57925	10.2553	10.0977	7.78473	7.6337	7.61359	7.82372	7.83331
10383088	Gaa	glucosidase, alpha, acid	0	2.11	4.31691		10.9923	10.9558	10.941	10.8115	10.8475	8.86649	8.79161	8.65823	8.85909	8.81291
10463355	Scd2	stearoyl-Coenzyme A desaturase 2	0	2.11	4.31691		13.0708	13.0119	13.0284	13.0532	13.0709	11.1349	10.7138	10.8389	10.96	11.043
10522075	Klhl5	kelch-like 5 (Drosophila)	0	2.11	4.31691		9.99746	9.84143	9.93457	9.93917	10.0224	7.81815	7.66827	7.66511	7.96306	8.07872
10367945	Phactr2	phosphatase and actin regulator 2	0	2.11	4.31691		9.52883	9.26552	9.32255	9.45795	9.39462	7.27246	7.08562	7.09614	7.48533	7.47497
10581181	Tradd	TNFRSF1A-associated via death domain	0	2.11	4.31691		9.08464	9.24961	9.1658	8.83953	9.14799	7.05004	6.89287	6.78249	7.22389	7.00126
10506298	Leprot	leptin receptor overlapping transcript	0	2.11	4.31691		9.97861	9.94369	9.72545	9.65659	9.66324	7.88897	7.69032	7.70619	7.41828	7.72157
10451004	Cd2ap	CD2-associated protein	0	2.11	4.31691		11.3041	10.9695	11.2116	11.4193	11.2475	9.31879	8.97378	8.94307	9.27215	9.10524
10341185			0	2.11	4.31691		10.7582	10.6111	10.4897	10.4609	10.4887	8.33151	8.39648	8.15361	8.66667	8.68646
10545001	Ppm1k	protein phosphatase 1K (PP2C domain containing)	0	2.11	4.31691		9.13008	9.43836	9.16763	8.90473	8.99368	6.77448	7.02253	7.03842	7.29139	6.96698
10506110	L1td1	LINE-1 type transposase domain containing 1	0	2.11	4.31691		8.38636	8.09936	8.16797	8.54689	8.37731	6.37164	5.86677	6.07863	6.39484	6.30623
10527340	Trrap	transformation/transcription domain-associated protein	0	2.11	4.31691		11.5568	11.3309	11.3395	11.5787	11.6124	9.26723	9.11052	9.18819	9.59019	9.69286
10356999	Prdx2	peroxiredoxin 2	0	2.11	4.31691		12.435	12.2609	12.3848	12.5845	12.4842	10.3934	10.0179	10.0964	10.7491	10.326
10375083	Stk10	serine/threonine kinase 10	0	2.1	4.28709		10.4025	10.3685	10.4316	10.5006	10.5283	8.35187	8.34059	8.30214	8.3448	8.37703
10413419	Arhgef3	Rho guanine nucleotide exchange factor (GEF) 3	0	2.1	4.28709		9.80198	9.67581	9.67078	9.66819	9.66296	7.66554	7.52185	7.60821	7.70058	7.4632
10427222	Amhr2	anti-Mullerian hormone type 2 receptor	0	2.1	4.28709		13.3943	13.4257	13.4151	13.3155	13.3283	11.432	11.1654	11.2148	11.3262	11.2175
10509868	Atp13a2	ATPase type 13A2	0	2.1	4.28709		10.6179	10.3578	10.4652	10.5018	10.5405	8.41555	8.4141	8.23361	8.42938	8.49945
10372831	Tbc1d30	TBC1 domain family, member 30	0	2.1	4.28709		7.86601	7.88112	7.73431	7.80497	7.71535	5.72104	5.52755	5.92359	5.65085	5.7007
10535331	Mmd2	monocyte to macrophage differentiation-associated 2	0	2.1	4.28709		12.4773	12.3165	12.2831	12.2871	12.203	10.4307	10.0759	10.1311	10.2838	10.1606
10430319	Tst	thiosulfate sulfurtransferase, mitochondrial	0	2.1	4.28709		10.1728	10.2589	10.2742	9.96248	10.0393	7.96761	8.10135	8.05999	7.87755	8.1996
10454254	Dtna	dystrobrevin alpha	0	2.1	4.28709		9.50604	9.30871	9.38786	9.54929	9.497	7.45937	7.1899	7.16383	7.4452	7.48571
10350113	Arl8a	ADP-ribosylation factor-like 8A	0	2.1	4.28709		10.8181	10.6162	10.5293	10.7948	10.6233	8.6876	8.42837	8.43907	8.6254	8.71994
10373223	Lrp1	low density lipoprotein receptor-related protein 1	0	2.1	4.28709		10.6499	10.5934	10.5115	10.5966	10.6082	8.43737	8.2374	8.31426	8.75834	8.68962
10571774	Aga	aspartylglucosaminidase	0	2.1	4.28709		9.96003	9.86233	9.75458	10.051	9.77259	7.97432	7.60363	7.60564	8.03522	7.65964
10361869	Nhsl1	NHS-like 1	0	2.1	4.28709		9.58552	9.35644	9.40539	9.73746	9.59045	7.4278	7.29512	7.1884	7.67069	7.56994
10475019	Itpka	inositol 1,4,5-trisphosphate 3-kinase A	0	2.1	4.28709		8.88038	8.70231	8.81807	8.43926	8.34632	6.45216	6.57118	6.73446	6.46391	6.46666
10548286	Klrb1a	killer cell lectin-like receptor subfamily B member 1A	0	2.1	4.28709		6.48728	7.09238	6.85585	6.96396	6.96603	4.48101	4.82739	4.8515	4.80518	4.88244
10510643	Plekhg5	pleckstrin homology domain containing, family G (with RhoGef domain) member 5	0	2.1	4.28709		9.04557	8.85536	9.02102	9.51162	9.4072	6.94846	6.77635	7.13858	7.25935	7.2009
10523281	2012-09-11	septin 11	0	2.1	4.28709		10.1664	9.42749	9.70987	10.1768	9.3379	7.80035	7.3983	7.60596	8.03473	7.49286
10524684	Msi1	Musashi homolog 1(Drosophila)	0	2.1	4.28709		10.3102	10.126	10.2152	10.8793	10.7192	8.18654	8.11054	8.01604	8.82537	8.61923
10338973			0	2.1	4.28709		8.25049	7.20589	7.64858	7.7567	7.23477	5.93866	5.24862	5.35188	5.84406	5.20659
10604844	Sms	spermine synthase	0	2.09	4.25748		10.3707	10.4239	10.3829	10.2392	10.269	8.39992	8.34086	8.18321	8.23077	8.09405
10437765	Cpped1	calcineurin-like phosphoesterase domain containing 1	0	2.09	4.25748		9.39543	9.39283	9.47631	9.59745	9.57869	7.39669	7.34694	7.23301	7.49755	7.50539
10521222	Add1	adducin 1 (alpha)	0	2.09	4.25748		11.4367	11.2624	11.3338	11.1537	11.1798	9.26906	9.1229	9.08332	9.30476	9.12257
10482448	Zeb2	zinc finger E-box binding homeobox 2	0	2.09	4.25748		8.77075	8.69313	8.64669	8.62332	8.60393	6.75746	6.35334	6.46518	6.76032	6.57455
10357051	Kdsr	3-ketodihydrosphingosine reductase	0	2.09	4.25748		9.97189	10.0446	9.84323	9.65096	9.65915	7.8465	7.74878	7.80956	7.63883	7.6853
10600547	Tbl1x	transducin (beta)-like 1 X-linked	0	2.09	4.25748		10.5115	10.3951	10.4337	10.507	10.6025	8.42843	8.22511	8.20806	8.52266	8.63259
10377215	Gas7	growth arrest specific 7	0	2.09	4.25748		10.9201	10.7586	10.8967	11.0586	11.154	8.7741	8.84278	8.67532	8.96746	9.09618
10554808	Fzd4	frizzled homolog 4 (Drosophila)	0	2.09	4.25748		8.78182	8.93573	8.95273	8.49314	8.59298	6.78038	6.5717	6.67802	6.7309	6.54031
10363669	Dnajc12	DnaJ (Hsp40) homolog, subfamily C, member 12	0	2.09	4.25748		9.23152	9.01736	9.00967	9.36731	9.33968	7.07371	6.83106	7.17007	7.07208	7.36145
10354258	Uxs1	UDP-glucuronate decarboxylase 1	0	2.09	4.25748		11.5193	11.2197	11.2499	11.6866	11.6594	9.35943	9.10165	9.3371	9.6208	9.48292
10586064	Anp32a	acidic (leucine-rich) nuclear phosphoprotein 32 family, member A	0	2.09	4.25748		9.42176	9.35143	9.42981	9.68332	9.81965	7.26491	7.10943	7.3398	7.80207	7.74634
10340606			0	2.09	4.25748		9.91249	9.65638	9.65339	10.2604	10.0386	7.9843	7.30967	7.45681	8.16929	8.12863
10478907	Pard6b	par-6 (partitioning defective 6) homolog beta (C. elegans)	0	2.08	4.22807		10.1575	10.004	10.026	9.91986	9.99001	7.94103	7.89061	7.95288	7.92437	7.97193
10394778	Hpcal1	hippocalcin-like 1	0	2.08	4.22807		10.2423	10.2055	10.2686	10.3008	10.3057	8.21985	8.07097	8.04836	8.33073	8.24807
10416657	Elf1	E74-like factor 1	0	2.08	4.22807		9.34005	9.20797	9.28416	9.1278	9.07065	7.27962	6.92979	7.15495	7.11417	7.15041
10598664	Atp6ap2	ATPase, H+ transporting, lysosomal accessory protein 2	0	2.08	4.22807		10.3388	10.3149	10.2716	10.0092	9.94529	8.31131	8.09428	8.14852	8.13039	7.78991
10482968	Pla2r1	phospholipase A2 receptor 1	0	2.08	4.22807		8.55504	8.69389	8.5782	8.10209	8.22241	6.41659	6.42785	6.30246	6.23037	6.39643
10355246	Acadl	acyl-Coenzyme A dehydrogenase, long-chain	0	2.08	4.22807		10.7268	10.7159	10.7929	10.5326	10.6751	8.91762	8.24514	8.51391	8.7532	8.60475
10345174			0	2.08	4.22807		9.17199	8.74468	9.01038	8.92392	8.99909	7.02258	6.80912	6.73802	7.33864	6.52908
10585860	Adpgk	ADP-dependent glucokinase	0	2.08	4.22807		10.2388	10.0094	9.99321	9.39418	9.66542	8.14929	7.74414	7.66615	7.62909	7.69268
10351546	Apoa2	apolipoprotein A-II	0	2.08	4.22807		9.38058	9.31847	9.48477	10.4772	10.3261	7.43229	7.56309	7.33584	8.15375	8.11811
10390059	Xylt2	xylosyltransferase II	0	2.07	4.19887		8.8189	8.80071	8.74799	8.72208	8.81286	6.65668	6.61088	6.65879	6.84499	6.76756
10478424	Ywhab	tyrosine 3-monooxygenase/tryptophan 5-monooxygenase activation protein, beta polypeptide	0	2.07	4.19887		12.1617	12.0599	12.1225	12.0724	12.1674	10.2491	10.0043	9.98188	10.0131	9.99723
10417167	Clybl	citrate lyase beta like	0	2.07	4.19887		9.42167	9.34298	9.40956	9.40935	9.36155	7.44921	7.17941	7.21357	7.25695	7.48003
10367746	Sash1	SAM and SH3 domain containing 1	0	2.07	4.19887		9.64096	9.52741	9.58584	9.529	9.76321	7.53073	7.43908	7.43482	7.66539	7.63807
10413803	Btd	biotinidase	0	2.07	4.19887		8.58186	8.44887	8.42693	8.43739	8.44406	6.48349	6.40986	6.31854	6.59231	6.20428
10581772	Glg1	golgi apparatus protein 1	0	2.07	4.19887		11.5078	11.4567	11.4157	11.2846	11.3629	9.35783	9.11976	9.27784	9.49131	9.44037
10495035	Slc16a1	solute carrier family 16 (monocarboxylic acid transporters), member 1	0	2.07	4.19887		11.7484	11.7542	11.7813	11.4433	11.5387	9.7897	9.45401	9.5881	9.59542	9.51022
10362811	Sesn1	sestrin 1	0	2.07	4.19887		11.2008	11.0835	11.0358	10.7889	10.8767	9.12357	8.84578	8.88818	8.84997	8.92885
10394990	Mboat2	membrane bound O-acyltransferase domain containing 2	0	2.07	4.19887		11.1489	10.8474	10.9173	11.1463	11.0038	9.13846	8.74731	8.75689	9.08593	9.00815
10524876	Vsig10	V-set and immunoglobulin domain containing 10	0	2.07	4.19887		10.045	9.98067	9.81766	10.0996	10.0387	7.949	7.59053	7.914	7.96008	8.22462
10368577	Rnf217	ring finger protein 217	0	2.07	4.19887		8.80734	8.61858	8.63837	9.10199	9.05083	6.721	6.60323	6.80097	6.84316	6.91943
10608138	Ddx3y	DEAD (Asp-Glu-Ala-Asp) box polypeptide 3, Y-linked	0	2.07	4.19887		10.6143	10.6341	10.6319	10.2415	10.3649	8.71451	8.34468	8.52334	8.34451	8.22974
10506571	Dhcr24	24-dehydrocholesterol reductase	0	2.07	4.19887		11.6275	11.4147	11.3139	11.6885	11.6326	9.50027	9.21865	9.24055	9.69696	9.69511
10590149	Xylb	xylulokinase homolog (H. influenzae)	0	2.07	4.19887		9.25085	8.91816	8.90892	9.35871	9.22816	7.14094	6.86684	6.90858	7.37068	7.0243
10542317	Cdkn1b	cyclin-dependent kinase inhibitor 1B	0	2.07	4.19887		7.67	7.29464	7.20177	7.93563	7.89987	5.45202	5.3195	5.58719	5.75449	5.5312
10375503	Trim7	tripartite motif-containing 7	0	2.06	4.16986		8.86388	8.72615	8.7014	8.76809	8.69323	6.63253	6.61578	6.73837	6.76246	6.71017
10569569	Cttn	cortactin	0	2.06	4.16986		11.4135	11.3074	11.2539	11.3063	11.4129	9.39505	9.14116	9.34233	9.26266	9.24936
10497321	Pgam1	phosphoglycerate mutase 1	0	2.06	4.16986		11.4129	11.3473	11.4125	11.3357	11.4454	9.35114	9.15196	9.28125	9.40955	9.44846
10607524	Sms	spermine synthase	0	2.06	4.16986		10.2992	10.3271	10.2773	10.1643	10.2097	8.33897	8.29797	8.09537	8.15639	8.08562
10554375	Sema4b	sema domain, immunoglobulin domain (Ig), transmembrane domain (TM) and short cytoplasmic domain, (semaphorin) 4B	0	2.06	4.16986		9.83067	9.75188	9.89823	9.90792	9.89987	7.89641	7.67765	7.65512	7.88318	7.87423
10376263	Mfap3	microfibrillar-associated protein 3	0	2.06	4.16986		10.7749	10.8468	10.761	10.7706	10.9251	8.79531	8.56086	8.69972	8.85309	8.84644
10492890	Lrba	LPS-responsive beige-like anchor	0	2.06	4.16986		10.046	10.1671	10.2267	10.128	10.1658	8.07622	7.93967	7.99037	8.2439	8.19954
10340602			0	2.06	4.16986		11.8458	11.6821	11.7838	11.8463	11.7153	9.8856	9.55019	9.72041	9.78229	9.62414
10528385	Reln	reelin	0	2.06	4.16986		9.35395	9.49964	9.53088	9.1577	9.43901	7.33337	7.33424	7.28644	7.32537	7.40294
10491970	Lhfp	lipoma HMGIC fusion partner	0	2.06	4.16986		9.25621	9.09474	9.04078	8.98615	9.07804	7.08035	6.89338	6.86741	7.10211	7.2071
10600377	Atp6ap1	ATPase, H+ transporting, lysosomal accessory protein 1	0	2.06	4.16986		11.5673	11.653	11.7278	11.3667	11.402	9.61148	9.38069	9.38731	9.53119	9.52452
10380739	Osbpl7	oxysterol binding protein-like 7	0	2.06	4.16986		9.03727	8.91626	8.84864	9.13977	9.12548	6.90734	6.78453	6.85911	7.25968	6.95803
10450579	Ddr1	discoidin domain receptor family, member 1	0	2.06	4.16986		9.57509	9.33439	9.34924	9.74748	9.59669	7.39234	7.34323	7.47636	7.73426	7.37391
10360914	Lyplal1	lysophospholipase-like 1	0	2.06	4.16986		10.5231	10.3954	10.5069	10.1613	10.128	8.43619	8.42581	8.24055	8.04107	8.25544
10340423			0	2.06	4.16986		9.71295	9.4879	9.55786	9.77426	9.66953	7.55068	7.24342	7.44803	7.90801	7.74323
10529758	Bod1l	biorientation of chromosomes in cell division 1-like	0	2.06	4.16986		9.8428	9.8262	9.83101	10.1331	10.3251	7.9428	7.6351	7.7374	8.19772	8.14401
10495967	Tifa	TRAF-interacting protein with forkhead-associated domain	0	2.06	4.16986		8.85367	9.09068	9.27729	8.57142	8.92259	7.1403	6.90526	7.07286	6.72171	6.57836
10493203	0610031J06Rik	RIKEN cDNA 0610031J06 gene	0	2.06	4.16986		10.1492	10.1888	10.1765	9.55722	9.66864	8.18978	7.92681	7.90246	7.84296	7.56866
10405355	Unc5a	unc-5 homolog A (C. elegans)	0	2.06	4.16986		9.16104	8.32302	8.47453	8.76118	8.38565	6.57966	6.31663	6.35348	6.79705	6.73955
10363786	Ank3	ankyrin 3, epithelial	0	2.05	4.14106		8.31219	8.16443	8.15122	8.29059	8.19297	6.13613	6.07353	6.09336	6.36121	6.18514
10382300	Map2k6	mitogen-activated protein kinase kinase 6	0	2.05	4.14106		7.96611	8.09839	7.98981	8.1262	8.15972	5.9597	5.94548	6.00459	6.21378	5.97614
10516064	Mfsd2a	major facilitator superfamily domain containing 2A	0	2.05	4.14106		9.52962	9.53905	9.59736	9.45589	9.31527	7.51194	7.53189	7.45317	7.33055	7.35603
10507594	Slc2a1	solute carrier family 2 (facilitated glucose transporter), member 1	0	2.05	4.14106		10.4328	10.6375	10.6448	10.3687	10.3601	8.39916	8.46649	8.42869	8.40232	8.496
10606195	Rlim	ring finger protein, LIM domain interacting	0	2.05	4.14106		11.1172	10.9375	11.0864	11.2015	11.271	9.02197	8.89714	9.04113	9.24285	9.17603
10586130	Aagab	alpha- and gamma-adaptin binding protein	0	2.05	4.14106		10.0612	10.0813	10.0067	10.2333	10.3803	8.00966	8.02502	8.02178	8.20012	8.24596
10339936			0	2.05	4.14106		13.3363	13.3433	13.2951	13.4043	13.4157	11.3782	11.0549	11.1629	11.4982	11.4693
10544150	Jhdm1d	jumonji C domain-containing histone demethylase 1 homolog D (S. cerevisiae)	0	2.05	4.14106		11.5612	11.4845	11.6162	11.7558	11.7961	9.61798	9.46355	9.36163	9.78624	9.72671
10528507	Pus7	pseudouridylate synthase 7 homolog (S. cerevisiae)	0	2.05	4.14106		9.09822	9.09273	9.10501	9.13436	9.25175	7.42379	6.92673	6.89558	7.07849	7.11755
10508412	Fndc5	fibronectin type III domain containing 5	0	2.05	4.14106		10.522	10.3152	10.1774	10.2921	10.2112	8.39084	7.96278	8.24006	8.28632	8.40943
10454286	Mapre2	microtubule-associated protein, RP/EB family, member 2	0	2.05	4.14106		9.80033	9.73531	9.64384	9.717	9.49857	7.74387	7.82418	7.72267	7.57515	7.28552
10395155	Fam110c	family with sequence similarity 110, member C	0	2.05	4.14106		8.06892	8.03216	7.60943	8.08898	7.8221	6.04547	5.8661	5.84982	5.66416	5.94143
10361807	Hivep2	human immunodeficiency virus type I enhancer binding protein 2	0	2.05	4.14106		7.69144	7.58483	7.25648	7.54733	7.58942	5.42215	5.32111	5.29864	5.80208	5.55947
10427895	Basp1	brain abundant, membrane attached signal protein 1	0	2.05	4.14106		10.9492	10.8326	10.864	11.1318	11.1119	9.07956	8.74146	8.62141	9.14395	9.0743
10557742	Fbxl19	F-box and leucine-rich repeat protein 19	0	2.05	4.14106		10.6572	10.5586	10.548	10.8319	10.8878	8.58661	8.53127	8.37696	8.96332	8.7856
10368041	3110003A17Rik	RIKEN cDNA 3110003A17 gene	0	2.05	4.14106		8.56665	8.3078	8.28551	8.745	8.64066	6.85205	5.97645	6.46227	6.69108	6.33097
10504234	Unc13b	unc-13 homolog B (C. elegans)	0	2.04	4.11246		10.348	10.5724	10.2413	10.2322	10.2663	8.33103	8.28439	8.22055	8.30475	8.29574
10452485	Rab31	RAB31, member RAS oncogene family	0	2.04	4.11246		12.5482	12.3655	12.4111	12.3298	12.3895	10.4656	10.2315	10.2674	10.387	10.5152
10362941	Prep	prolyl endopeptidase	0	2.04	4.11246		10.5656	10.558	10.6782	10.4008	10.3305	8.48926	8.4917	8.40107	8.5384	8.40872
10599997	Mtmr1	myotubularin related protein 1	0	2.04	4.11246		10.4989	10.2997	10.4439	10.3287	10.281	8.54871	8.33729	8.173	8.33823	8.27049
10567702	Arhgap17	Rho GTPase activating protein 17	0	2.04	4.11246		9.41517	9.21133	9.33087	9.49484	9.45371	7.24562	7.28928	7.15989	7.53265	7.47616
10474836	Ivd	isovaleryl coenzyme A dehydrogenase	0	2.04	4.11246		11.3717	11.6908	11.6418	11.1578	11.4445	9.46095	9.4385	9.39841	9.34446	9.47223
10449207	Rab11fip3	RAB11 family interacting protein 3 (class II)	0	2.04	4.11246		10.9748	10.7495	10.6918	11.0479	11.1066	8.87603	8.67377	8.81026	9.04663	8.96074
10569786	Pnpla6	patatin-like phospholipase domain containing 6	0	2.04	4.11246		9.43813	9.56099	9.60454	9.08792	9.49585	7.50957	7.20698	7.47277	7.30165	7.51179
10605831	Las1l	LAS1-like (S. cerevisiae)	0	2.04	4.11246		9.23844	9.01011	9.04836	9.32338	9.22151	7.12261	6.90149	6.90034	7.27229	7.43252
10604405	Aifm1	apoptosis-inducing factor, mitochondrion-associated 1	0	2.04	4.11246		10.0986	9.69956	10.0026	10.0606	9.82194	8.049	7.53484	7.87822	8.0536	7.96467
10399360	Rhob	ras homolog gene family, member B	0	2.04	4.11246		9.69141	9.55875	9.29796	9.80395	9.70284	7.6616	7.40991	7.36649	7.84809	7.58502
10558548	Kndc1	kinase non-catalytic C-lobe domain (KIND) containing 1	0	2.04	4.11246		8.85498	8.56858	8.85135	9.27334	9.00343	6.68561	6.85399	6.79741	7.01964	6.97277
10547009	Vgll4	vestigial like 4 (Drosophila)	0	2.04	4.11246		10.2913	10.312	10.1574	10.3782	10.5222	8.27433	8.01017	8.17852	8.83175	8.14393
10359713	Sft2d2	SFT2 domain containing 2	0	2.03	4.08405		10.8907	10.8311	10.8714	10.6934	10.7019	8.89536	8.74392	8.71492	8.80072	8.68428
10344750	Sgk3	serum/glucocorticoid regulated kinase 3	0	2.03	4.08405		11.4413	11.3231	11.3358	11.2683	11.4006	9.46572	9.17225	9.28976	9.29877	9.37164
10479950	Celf2	CUGBP, Elav-like family member 2	0	2.03	4.08405		10.6304	10.5969	10.641	10.3341	10.5274	8.61824	8.45798	8.49876	8.45396	8.5441
10542885	2810474O19Rik	RIKEN cDNA 2810474O19 gene	0	2.03	4.08405		8.903	8.88006	8.915	8.91715	8.95975	6.82604	6.74174	6.934	7.13072	6.80348
10458555	Spry4	sprouty homolog 4 (Drosophila)	0	2.03	4.08405		8.34226	8.48945	8.39141	8.09954	8.42815	6.362	6.43868	6.29615	6.26711	6.21416
10575775	4933407C03Rik	RIKEN cDNA 4933407C03 gene	0	2.03	4.08405		8.93548	8.86297	9.10825	8.81136	8.91944	6.89299	7.03604	6.65252	6.86979	7.05536
10595718	Chst2	carbohydrate sulfotransferase 2	0	2.03	4.08405		8.25269	8.52414	8.66921	8.44041	8.52066	6.19117	6.48882	6.64597	6.29884	6.61622
10423363	Ank	progressive ankylosis	0	2.03	4.08405		10.5284	10.2612	10.2496	10.4362	10.0444	8.58101	8.20006	8.19711	8.22552	8.15507
10555438	Fchsd2	FCH and double SH3 domains 2	0	2.03	4.08405		10.5797	10.4469	10.488	10.7003	10.7993	8.59255	8.39211	8.31793	8.88956	8.68096
10495206	Slc16a4	solute carrier family 16 (monocarboxylic acid transporters), member 4	0	2.03	4.08405		7.47913	7.67876	7.49916	7.8201	7.90481	5.27204	5.61165	5.39824	5.96089	5.96539
10404053	Hist1h2bc	histone cluster 1, H2bc	0	2.03	4.08405		9.02947	9.09129	9.28191	10.391	10.288	7.0617	7.2641	7.22436	8.33858	8.03905
10412667	Ptprg	protein tyrosine phosphatase, receptor type, G	0	2.02	4.05584		9.72638	9.67609	9.59835	9.7984	9.67206	7.73761	7.61199	7.61852	7.66865	7.72485
10463168	Pgam1	phosphoglycerate mutase 1	0	2.02	4.05584		11.311	11.1945	11.2525	11.1184	11.2082	9.25181	9.04071	9.17447	9.27904	9.2435
10561302	Pgam1	phosphoglycerate mutase 1	0	2.02	4.05584		11.311	11.1945	11.2525	11.1184	11.2082	9.25181	9.04071	9.17447	9.27904	9.2435
10540493	Edem1	ER degradation enhancer, mannosidase alpha-like 1	0	2.02	4.05584		10.4592	10.4658	10.5468	10.2553	10.4106	8.40218	8.4159	8.42	8.31218	8.47634
10575777	4933407C03Rik	RIKEN cDNA 4933407C03 gene	0	2.02	4.05584		9.63581	9.54295	9.48313	9.82486	9.72844	7.53969	7.52257	7.56402	7.74767	7.74293
10512728	Tstd2	thiosulfate sulfurtransferase (rhodanese)-like domain containing 2	0	2.02	4.05584		10.2076	10.1474	10.1639	9.89794	10.0166	8.22389	8.03546	8.16975	7.9484	7.95359
10602756	Smpx	small muscle protein, X-linked	0	2.02	4.05584		11.0551	10.7763	10.6449	11.1089	10.9776	8.96399	8.79008	8.81981	9.00148	8.87514
10600819	Zxdb	zinc finger, X-linked, duplicated B	0	2.02	4.05584		9.46087	9.4509	9.35273	9.79586	9.70767	7.53076	7.46131	7.41651	7.6832	7.59517
10483809	Nfe2l2	nuclear factor, erythroid derived 2, like 2	0	2.02	4.05584		10.1979	10.385	10.3504	10.2112	10.5776	8.50627	8.13759	8.20462	8.39436	8.4027
10498053	4930583H14Rik	RIKEN cDNA 4930583H14 gene	0	2.02	4.05584		10.2209	9.98261	10.083	10.3185	10.2223	8.38622	7.92242	8.07946	8.25875	8.09725
10474201	Lmo2	LIM domain only 2	0	2.02	4.05584		10.2762	10.3758	10.1822	9.79937	9.9163	8.07525	8.10279	8.09009	7.99704	8.16561
10445633	Prph2	peripherin 2	0	2.02	4.05584		8.84169	8.7203	8.85655	8.3966	8.25593	6.71868	6.59847	6.5459	6.52587	6.58615
10407097	Pde4d	phosphodiesterase 4D, cAMP specific	0	2.02	4.05584		9.03933	8.7491	8.72777	8.96767	8.51411	7.06573	6.56359	6.94437	6.69307	6.6166
10551542	Fbxo17	F-box protein 17	0	2.01	4.02782		9.22898	9.09911	9.16321	9.19082	9.14232	7.18734	6.97694	7.14723	7.22814	7.23175
10494662	Ywhah	tyrosine 3-monooxygenase/tryptophan 5-monooxygenase activation protein, eta polypeptide	0	2.01	4.02782		12.6757	12.5766	12.6295	12.7472	12.7369	10.6913	10.5587	10.5603	10.7109	10.8003
10535852	Slc7a1	solute carrier family 7 (cationic amino acid transporter, y+ system), member 1	0	2.01	4.02782		10.6696	10.6445	10.8538	10.5877	10.7481	8.6651	8.64804	8.63318	8.65908	8.85867
10513957	Ptprd	protein tyrosine phosphatase, receptor type, D	0	2.01	4.02782		10.0441	9.73688	9.88848	9.90357	9.82627	7.76449	7.90986	7.93756	7.78804	7.93743
10371356	Appl2	adaptor protein, phosphotyrosine interaction, PH domain and leucine zipper containing 2	0	2.01	4.02782		11.232	11.1312	11.1428	11.1228	11.2237	9.25922	8.96622	9.02633	9.26283	9.28032
10533360			0	2.01	4.02782		8.40445	8.29246	8.18286	8.03358	7.92641	6.13146	6.16586	6.21629	6.22492	6.05446
10542665	Cmas	cytidine monophospho-N-acetylneuraminic acid synthetase	0	2.01	4.02782		11.7952	11.5482	11.5573	11.7015	11.6131	9.83986	9.42314	9.468	9.71219	9.70407
10371134	Gipc3	GIPC PDZ domain containing family, member 3	0	2.01	4.02782		9.6668	9.40568	9.49316	9.6813	9.31174	7.5267	7.60573	7.31028	7.62767	7.44595
10568568	Oat	ornithine aminotransferase	0	2.01	4.02782		11.2275	11.1331	11.0889	11.2599	11.2091	9.19721	8.97631	8.95444	9.36531	9.35189
10587829	Plod2	procollagen lysine, 2-oxoglutarate 5-dioxygenase 2	0	2.01	4.02782		9.33972	9.3003	9.48779	9.44972	9.31574	7.48284	7.21973	7.25732	7.65836	7.24199
10581890	Bcar1	breast cancer anti-estrogen resistance 1	0	2.01	4.02782		9.60645	9.36045	9.51951	9.6769	9.76576	7.50074	7.42261	7.48296	7.81459	7.67369
10606858	Tceal8	transcription elongation factor A (SII)-like 8	0	2.01	4.02782		9.76546	9.61751	9.63756	9.90941	9.79282	7.84643	7.44674	7.62572	7.891	7.86609
10557585	Zfp553	zinc finger protein 553	0	2.01	4.02782		8.38618	8.31734	8.35277	8.62881	8.40678	6.30871	6.19676	6.3134	6.62859	6.59532
10396511	Syne2	synaptic nuclear envelope 2	0	2.01	4.02782		10.5894	10.2443	10.3574	10.3737	10.5983	8.45253	8.29167	8.22511	8.44942	8.67964
10505163	Zkscan16	zinc finger with KRAB and SCAN domains 16	0	2.01	4.02782		7.9218	7.89961	8.00048	7.70416	7.90079	5.73874	5.60338	5.91006	6.18978	5.94186
10607865	Tmsb4x	thymosin, beta 4, X chromosome	0	2.01	4.02782		11.1091	10.8402	10.7604	10.7813	10.7325	9.05679	8.90062	8.97498	8.77564	8.48485
10373400	Myl6b	myosin, light polypeptide 6B	0	2.01	4.02782		8.99806	8.62459	8.64897	9.45549	9.42084	6.86131	6.91307	7.04189	7.21725	7.0718
10462504	Minpp1	multiple inositol polyphosphate histidine phosphatase 1	0	2.01	4.02782		9.74215	9.69785	9.59102	9.29394	8.98646	7.97424	7.37849	7.49105	7.36714	7.04723
10524621	Oasl2	2'-5' oligoadenylate synthetase-like 2	0	2.01	4.02782		9.216	8.64707	8.58201	9.20461	8.31081	7.02653	6.60565	6.67956	7.08196	6.51171
10536334	Dync1i1	dynein cytoplasmic 1 intermediate chain 1	0	2	4		9.96191	9.90087	9.99516	9.93707	9.97652	7.97682	7.90162	7.89177	7.96907	8.04422
10370072	Prmt2	protein arginine N-methyltransferase 2	0	2	4		9.37386	9.20963	9.18893	9.21552	9.09605	7.2928	7.10942	7.18017	7.24749	7.24869
10516427	Ncdn	neurochondrin	0	2	4		9.03462	8.9782	8.96894	9.07421	8.96678	6.90153	6.99632	6.88395	7.05725	7.17533
10395831	Brms1l	breast cancer metastasis-suppressor 1-like	0	2	4		11.1275	11.0487	11.076	10.8774	10.8597	9.13542	8.99949	9.00628	8.93752	8.93523
10456922	5430411K18Rik	RIKEN cDNA 5430411K18 gene	0	2	4		10.3132	10.2369	10.1061	10.3245	10.3344	8.23307	8.17366	8.12379	8.30609	8.45914
10436442	Fam60a	family with sequence similarity 60, member A	0	2	4		10.5969	10.4873	10.4094	10.6731	10.7024	8.64727	8.41421	8.52977	8.69166	8.57418
10606301	Magt1	magnesium transporter 1	0	2	4		10.0823	10.066	10.1096	9.79837	9.75009	8.12265	7.81502	8.0118	8.02131	7.8405
10454039	Impact	imprinted and ancient	0	2	4		10.2026	10.1284	10.0374	9.85778	9.8049	8.29705	7.89648	7.9819	7.9459	7.90903
10342246			0	2	4		11.2098	11.1625	11.2493	11.5479	11.5751	9.40743	9.10409	9.22033	9.57606	9.43175
10585699	Fabp5	fatty acid binding protein 5, epidermal	0	2	4		8.56913	8.6613	8.52025	8.03723	8.31376	6.31852	6.36215	6.59907	6.36194	6.47362
10343721			0	2	4		10.2631	10.0379	9.97261	9.62925	9.81795	7.97695	7.82102	8.06837	7.71385	8.12412
10490838	Fabp5	fatty acid binding protein 5, epidermal	0	2	4		8.47741	8.41555	8.3048	7.77541	8.01364	6.15358	6.21008	6.36449	6.14013	6.13766
10566767	St5	suppression of tumorigenicity 5	0	2	4		10.2595	9.92407	9.90952	10.3448	10.3236	8.12917	7.99776	7.88675	8.41137	8.34948
10361098	Nenf	neuron derived neurotrophic factor	0	2	4		10.5125	10.4329	10.4767	9.72598	9.85663	8.39495	8.30976	8.30951	8.14495	7.86463
10506714	Lrp8	low density lipoprotein receptor-related protein 8, apolipoprotein e receptor	0	1.99	3.97237		12.0783	12.0053	12.0339	11.8678	11.9236	10.0497	9.99179	9.91599	9.97414	10.0141
10527732			0	1.99	3.97237		9.13083	8.94037	8.86615	9.03405	9.06886	7.01053	7.04145	6.95607	7.08031	7.01384
10457640	S100a11	S100 calcium binding protein A11 (calgizzarin)	0	1.99	3.97237		10.5491	10.4429	10.5311	10.5559	10.6029	8.54107	8.48482	8.42321	8.57445	8.71603
10583992	Igsf9b	immunoglobulin superfamily, member 9B	0	1.99	3.97237		9.1504	9.21463	9.14398	9.16697	9.34436	7.05521	7.22455	7.13849	7.34695	7.28886
10350684	Arpc5	actin related protein 2/3 complex, subunit 5	0	1.99	3.97237		11.2544	11.0231	10.9362	10.9512	11.0568	9.172	8.95799	9.01368	9.12523	9.02009
10525439	P2rx4	purinergic receptor P2X, ligand-gated ion channel 4	0	1.99	3.97237		9.46532	9.59018	9.5309	9.18147	9.32173	7.50868	7.3126	7.43285	7.37175	7.53087
10522467	Rasl11b	RAS-like, family 11, member B	0	1.99	3.97237		8.99727	8.7585	8.7525	8.72623	8.77119	6.94264	6.5297	6.80814	6.90599	6.854
10524460	Acacb	acetyl-Coenzyme A carboxylase beta	0	1.99	3.97237		8.74141	8.95123	8.78562	8.47223	8.88624	6.78905	6.8858	6.64084	6.82332	6.76687
10378816	Slc6a4	solute carrier family 6 (neurotransmitter transporter, serotonin), member 4	0	1.99	3.97237		9.14201	8.89892	8.95579	8.63381	8.71886	7.08507	6.72614	6.7365	6.94979	6.9029
10592084	St3gal4	ST3 beta-galactoside alpha-2,3-sialyltransferase 4	0	1.99	3.97237		10.2023	9.72567	9.82482	9.81128	9.59958	8.1045	7.71177	7.72188	7.90884	7.75794
10503198	Chd7	chromodomain helicase DNA binding protein 7	0	1.99	3.97237		8.38369	8.19818	8.08219	8.77123	8.97386	6.54797	6.2403	6.13641	7.06859	6.48677
10342747			0	1.99	3.97237		10.6532	10.5002	10.4028	11.2299	11.2549	8.9756	8.30567	8.61844	9.07231	9.13933
10459183	Slc26a2	solute carrier family 26 (sulfate transporter), member 2	0	1.98	3.94493		10.8697	10.6946	10.7822	10.8109	10.8302	8.88654	8.75377	8.80753	8.79402	8.82601
10395376	Ankmy2	ankyrin repeat and MYND domain containing 2	0	1.98	3.94493		8.37622	8.35677	8.41173	8.48691	8.46912	6.36458	6.41954	6.44751	6.53143	6.44432
10402096	Ttc7b	tetratricopeptide repeat domain 7B	0	1.98	3.94493		9.6111	9.71551	9.69891	9.7025	9.82526	7.76809	7.65435	7.67967	7.69351	7.84109
10435094	Tnk2	tyrosine kinase, non-receptor, 2	0	1.98	3.94493		9.31256	9.20691	9.29419	9.32228	9.38524	7.37382	7.35126	7.13375	7.41473	7.34775
10493990	S100a11	S100 calcium binding protein A11 (calgizzarin)	0	1.98	3.94493		10.6741	10.5492	10.6562	10.6801	10.7892	8.67473	8.58877	8.53776	8.79547	8.84397
10582712	Egln1	EGL nine homolog 1 (C. elegans)	0	1.98	3.94493		9.32575	9.15395	9.20783	9.1925	9.25238	7.35186	7.05063	7.13287	7.32786	7.381
10395259	Nampt	nicotinamide phosphoribosyltransferase	0	1.98	3.94493		10.6661	10.5579	10.6227	10.5756	10.5755	8.70685	8.36785	8.56209	8.82761	8.61714
10436828	Olig1	oligodendrocyte transcription factor 1	0	1.98	3.94493		8.52401	8.53935	8.64145	8.35467	8.38781	6.77619	6.39572	6.42365	6.39856	6.53476
10513362			0	1.98	3.94493		9.51329	9.47345	9.31244	9.23289	8.90175	7.2775	7.53679	7.24068	7.30606	7.19271
10554166	Akap13	A kinase (PRKA) anchor protein 13	0	1.98	3.94493		9.68605	9.52329	9.46959	9.67316	9.71362	7.50819	7.38261	7.44664	7.93689	7.89022
10461459	Syt7	synaptotagmin VII	0	1.98	3.94493		9.37115	9.30564	9.29047	9.52032	9.70311	7.32305	7.29022	7.28388	7.6044	7.78257
10472436	B3galt1	UDP-Gal:betaGlcNAc beta 1,3-galactosyltransferase, polypeptide 1	0	1.98	3.94493		6.9531	7.39006	7.33925	6.87534	7.19797	5.21205	5.38282	5.17634	4.75494	5.3493
10522606	Exoc1	exocyst complex component 1	0	1.97	3.91768		10.2281	10.1873	10.1819	10.1407	10.3221	8.34656	8.1346	8.15476	8.29206	8.30062
10342193			0	1.97	3.91768		11.2872	11.2484	11.2189	11.4466	11.4793	9.44612	9.30805	9.34399	9.37099	9.38097
10543333	Aass	aminoadipate-semialdehyde synthase	0	1.97	3.91768		8.37969	8.52577	8.52886	8.48109	8.25954	6.38016	6.45238	6.41035	6.58045	6.50961
10449581	Mtch1	mitochondrial carrier homolog 1 (C. elegans)	0	1.97	3.91768		11.2739	11.0746	11.0353	11.173	11.2256	9.33086	9.25804	9.10185	9.11215	9.15184
10338601			0	1.97	3.91768		10.0432	9.8537	9.89375	10.1042	10.1371	8.02785	7.97048	7.89981	8.21259	8.08315
10524878	Vsig10	V-set and immunoglobulin domain containing 10	0	1.97	3.91768		10.2301	10.0841	9.94427	10.1161	9.96493	8.19773	8.0425	7.92398	8.2946	8.0523
10445729	Tcfeb	transcription factor EB	0	1.97	3.91768		9.22419	8.90728	9.05883	8.88929	8.75908	7.0321	6.89929	7.01645	7.03142	7.00717
10514347	Cdkn2b	cyclin-dependent kinase inhibitor 2B (p15, inhibits CDK4)	0	1.97	3.91768		9.68456	9.6018	9.59956	9.87589	9.78562	7.6775	7.51231	7.775	7.91695	7.80369
10438340	Comt1	catechol-O-methyltransferase 1	0	1.97	3.91768		10.197	10.2569	10.1977	9.87237	9.95499	8.26263	8.09505	8.08458	8.15742	8.01325
10354732	Hspd1	heat shock protein 1 (chaperonin)	0	1.97	3.91768		10.7812	10.8388	10.733	10.4912	10.5775	8.80582	8.45744	8.64756	8.78066	8.86794
10592176	D730048I06Rik	RIKEN cDNA D730048I06 gene	0	1.97	3.91768		6.27465	6.38237	6.54219	6.38092	6.14278	4.60294	4.36897	4.40927	4.14158	4.32905
10460057	Tshz1	teashirt zinc finger family member 1	0	1.97	3.91768		9.17983	8.97943	9.01466	9.25746	9.08742	6.99691	7.0858	6.9136	7.4407	7.25641
10410408	Adcy2	adenylate cyclase 2	0	1.97	3.91768		8.76742	8.99716	9.01171	8.64401	9.12491	7.07413	6.89672	7.0345	6.69567	6.98856
10354286	Kdelc1	KDEL (Lys-Asp-Glu-Leu) containing 1	0	1.97	3.91768		7.81071	8.08442	7.98027	7.56151	7.83677	6.10318	5.77974	5.93465	5.70662	5.88633
10572949	Nr3c2	nuclear receptor subfamily 3, group C, member 2	0	1.97	3.91768		8.87699	8.64238	8.73742	8.92647	8.80836	7.00939	6.64163	6.50488	7.00137	6.97705
10339984			0	1.97	3.91768		9.4962	9.19005	9.24419	9.39769	9.14355	7.41032	6.93289	7.42781	7.57371	7.2631
10368566	Tpd52l1	tumor protein D52-like 1	0	1.97	3.91768		9.91473	9.69582	9.79474	10.2504	10.3075	7.97175	7.58859	7.8688	8.18974	8.47585
10469046	Phyh	phytanoyl-CoA hydroxylase	0	1.96	3.89062		10.1293	10.1388	10.0479	10.0687	10.2514	8.3314	8.0894	8.09024	8.18324	8.13294
10466374	Tle4	transducin-like enhancer of split 4, homolog of Drosophila E(spl)	0	1.96	3.89062		9.27743	9.17779	9.12411	9.00392	9.07602	7.25406	7.08287	7.17198	7.23838	7.09851
10596893	Dag1	dystroglycan 1	0	1.96	3.89062		11.1325	11.0019	11.0638	10.9443	10.9502	9.12831	8.86891	9.01416	9.11561	9.14733
10582978	8430410K20Rik	RIKEN cDNA 8430410K20 gene	0	1.96	3.89062		9.62471	9.65292	9.58962	9.74994	9.74306	7.86671	7.59099	7.60337	7.8025	7.69279
10416423	5031414D18Rik	RIKEN cDNA 5031414D18 gene	0	1.96	3.89062		8.75959	8.65182	8.61466	8.60104	8.53435	6.65144	6.43114	6.76708	6.76608	6.72978
10492102	Spg20	spastic paraplegia 20, spartin (Troyer syndrome) homolog (human)	0	1.96	3.89062		10.8778	10.7007	10.8009	10.5478	10.5455	8.76115	8.6211	8.72914	8.82589	8.74685
10365817	Ntn4	netrin 4	0	1.96	3.89062		9.47854	9.22914	9.03721	9.22281	9.22557	7.32836	7.18706	7.3696	7.30405	7.18204
10497441	Gyg	glycogenin	0	1.96	3.89062		8.18683	8.18794	8.1064	8.33301	8.40481	6.23567	6.06595	6.26527	6.47697	6.35742
10600150	Zfp275	zinc finger protein 275	0	1.96	3.89062		9.16445	9.39642	9.42649	9.19767	9.43572	7.54526	7.27165	7.32477	7.47352	7.18485
10522208	Uchl1	ubiquitin carboxy-terminal hydrolase L1	0	1.96	3.89062		11.6465	11.5151	11.5996	11.6155	11.6589	9.84886	9.49107	9.42378	9.84166	9.62989
10398751	Zfyve21	zinc finger, FYVE domain containing 21	0	1.96	3.89062		10.2062	10.0009	9.97545	9.97058	10.1292	7.95979	7.89808	8.05933	8.32766	8.21783
10604248	Thoc2	THO complex 2	0	1.96	3.89062		9.84509	9.665	9.77628	9.7705	9.83815	7.92068	7.60556	7.58906	7.96652	8.01389
10555389	Ucp2	uncoupling protein 2 (mitochondrial, proton carrier)	0	1.96	3.89062		11.7116	11.5869	11.6126	11.7162	11.7498	9.82218	9.43501	9.56471	9.94713	9.82068
10501420	Stxbp3a	syntaxin binding protein 3A	0	1.96	3.89062		9.63611	9.49289	9.51577	9.62144	9.67159	7.66916	7.26833	7.58868	7.8426	7.74731
10407291	Arl15	ADP-ribosylation factor-like 15	0	1.96	3.89062		9.09644	8.96442	8.92428	8.90578	9.00669	7.3235	6.9175	6.91844	7.17956	6.77064
10538377	Wipf3	WAS/WASL interacting protein family, member 3	0	1.96	3.89062		9.59641	9.33636	9.43584	9.8332	9.77284	7.59063	7.70754	7.45523	7.69903	7.69744
10340319			0	1.96	3.89062		10.3077	10.2267	10.0781	10.3922	10.2634	8.07902	8.08037	8.27566	8.4462	8.59382
10468294	Calhm2	calcium homeostasis modulator 2	0	1.96	3.89062		8.73699	8.76001	8.58585	8.36161	8.56175	6.43426	6.57228	6.75002	6.47683	6.97408
10362171	Stx7	syntaxin 7	0	1.96	3.89062		9.87146	9.50315	9.61024	9.91946	9.94745	7.8438	7.48499	7.62948	8.05521	8.0364
10344966	Ly96	lymphocyte antigen 96	0	1.96	3.89062		6.4554	6.22684	6.22111	7.19239	7.15828	4.72613	4.44977	4.57378	4.99851	4.71616
10579872	Tpd52	tumor protein D52	0	1.95	3.86375		8.98168	8.84893	8.77912	8.94278	8.85689	7.03367	6.80602	6.86849	7.00998	6.96553
10589929	Cmtm6	CKLF-like MARVEL transmembrane domain containing 6	0	1.95	3.86375		11.6349	11.5945	11.5413	11.3996	11.4025	9.71337	9.46679	9.53225	9.57769	9.52611
10373027	Tspan31	tetraspanin 31	0	1.95	3.86375		11.1625	11.1281	11.251	11.115	11.1518	9.27633	9.04594	9.09522	9.40023	9.22043
10523727	Pkd2	polycystic kidney disease 2	0	1.95	3.86375		10.2782	9.97263	10.0158	10.2628	10.0282	8.12064	8.10546	8.16266	8.24181	8.19997
10599537	Slc25a14	solute carrier family 25 (mitochondrial carrier, brain), member 14	0	1.95	3.86375		8.9095	8.63122	8.58689	8.7842	8.65931	6.95886	6.67358	6.80238	6.67564	6.68759
10446928	Ltbp1	latent transforming growth factor beta binding protein 1	0	1.95	3.86375		9.09476	9.44813	9.36707	9.12797	9.41491	7.26391	7.32487	7.27349	7.35814	7.47328
10597878	C85492	expressed sequence C85492	0	1.95	3.86375		9.47813	9.51429	9.3772	9.18552	9.32362	7.45959	7.21896	7.52793	7.33822	7.56948
10346810	Pard3b	par-3 partitioning defective 3 homolog B (C. elegans)	0	1.95	3.86375		8.78773	8.68022	8.71442	8.48418	8.68501	6.56955	6.59223	6.85353	6.64946	6.92
10409162	Susd3	sushi domain containing 3	0	1.95	3.86375		9.71389	9.81216	9.62704	9.79435	9.71948	7.92701	7.58219	7.53183	8.00612	7.86477
10533345	Aldh2	aldehyde dehydrogenase 2, mitochondrial	0	1.95	3.86375		12.4039	12.3913	12.375	12.208	12.2938	10.5402	10.0879	10.2906	10.633	10.351
10400483	Slc25a21	solute carrier family 25 (mitochondrial oxodicarboxylate carrier), member 21	0	1.95	3.86375		8.11796	8.41666	8.40061	8.14048	8.32542	6.47896	6.0553	6.24472	6.40453	6.47754
10475625	Eid1	EP300 interacting inhibitor of differentiation 1	0	1.95	3.86375		8.8763	8.43694	8.48148	8.82503	8.87507	6.66716	6.54595	6.61076	6.89522	7.03614
10499854	S100a1	S100 calcium binding protein A1	0	1.95	3.86375		9.5493	9.26017	9.30898	9.66883	9.47197	7.38664	7.34499	7.19615	7.84832	7.74456
10464445	Gm5521	mortality factor 4 like 2 pseudogene	0	1.95	3.86375		10.0978	9.78395	9.82313	10.2095	10.2948	8.345	7.88695	7.90293	8.39123	7.93677
10425321	Apobec3	apolipoprotein B mRNA editing enzyme, catalytic polypeptide 3	0.001	1.95	3.86375		7.64205	8.98087	9.19432	9.17889	9.57992	5.88024	7.08759	7.12921	7.24583	7.46595
10530100	Arap2	ArfGAP with RhoGAP domain, ankyrin repeat and PH domain 2	0	1.94	3.83706		10.3806	10.3856	10.3761	10.3282	10.4487	8.39856	8.43856	8.40291	8.46301	8.52315
10485170	Cry2	cryptochrome 2 (photolyase-like)	0	1.94	3.83706		10.845	10.7534	10.8386	10.8162	10.8682	8.89308	8.78466	8.80993	8.9468	8.99567
10429391	Slc45a4	solute carrier family 45, member 4	0	1.94	3.83706		11.301	11.3512	11.3481	11.4323	11.4314	9.33226	9.46316	9.33501	9.44116	9.5683
10523468	Bmp2k	BMP2 inducible kinase	0	1.94	3.83706		10.6618	10.4614	10.6372	10.4437	10.483	8.68236	8.45148	8.65436	8.61093	8.56641
10365482	Timp3	tissue inhibitor of metalloproteinase 3	0	1.94	3.83706		10.745	10.7229	10.8426	10.6397	10.6938	8.90483	8.8003	8.62324	8.91004	8.69792
10512640	Gne	glucosamine	0	1.94	3.83706		9.00871	8.6825	8.92303	8.92026	8.88787	6.97321	6.92528	6.82029	7.06231	6.94833
10488472	2310001A20Rik	RIKEN cDNA 2310001A20 gene	0	1.94	3.83706		10.2608	10.1792	10.4587	10.2223	10.1998	8.39881	8.20445	8.49545	8.27743	8.249
10506335	Pde4b	phosphodiesterase 4B, cAMP specific	0	1.94	3.83706		8.32479	8.17249	8.2302	8.2198	8.30147	6.39907	6.35185	6.04912	6.30339	6.44094
10526241	Cldn3	claudin 3	0	1.94	3.83706		9.68443	9.53413	9.58868	9.44176	9.32841	7.62512	7.42756	7.51644	7.75628	7.56363
10480347	Pip4k2a	phosphatidylinositol-5-phosphate 4-kinase, type II, alpha	0	1.94	3.83706		9.28726	9.20758	9.12286	9.0657	8.94598	7.34548	7.12768	7.0343	7.30371	7.12556
10559796	Peg3	paternally expressed 3	0	1.94	3.83706		8.38279	8.58578	8.62339	8.39085	8.52319	6.39065	6.56787	6.55815	6.4976	6.79914
10603508	Ftsj1	FtsJ homolog 1 (E. coli)	0	1.94	3.83706		9.20604	9.33932	9.18394	9.14738	9.29081	7.19687	7.21692	7.07389	7.53853	7.42504
10442027	Gm6705	predicted gene 6705	0	1.94	3.83706		11.0675	11.209	11.1249	10.8715	11.2695	9.31069	9.01023	9.23823	9.23372	9.03093
10538373	Prr15	proline rich 15	0	1.94	3.83706		9.55369	9.25039	9.30588	9.8276	9.53904	7.59493	7.67182	7.45956	7.56312	7.50639
10539080	St3gal5	ST3 beta-galactoside alpha-2,3-sialyltransferase 5	0	1.94	3.83706		11.702	11.5481	11.6683	11.286	11.3334	9.86934	9.496	9.50782	9.55845	9.42225
10579043	Lzts1	leucine zipper, putative tumor suppressor 1	0	1.94	3.83706		8.99778	8.73853	8.79338	9.075	9.11027	6.87492	7.07407	6.93103	6.74716	7.40849
10342053			0	1.94	3.83706		10.8465	10.8243	10.7926	11.2275	11.2502	8.8723	8.8284	8.74841	9.24668	9.54565
10593050	Il10ra	interleukin 10 receptor, alpha	0	1.94	3.83706		6.748	7.71505	7.66875	7.62886	7.56524	5.29445	5.35762	5.55341	5.95232	5.47848
10535927	Nme2	non-metastatic cells 2, protein (NM23B) expressed in	0	1.94	3.83706		10.7835	10.2264	10.1848	11.3777	11.0097	8.95268	8.33948	8.64125	9.18727	8.76566
10393379	Mxra7	matrix-remodelling associated 7	0	1.93	3.81055		9.68822	9.67839	9.55574	9.64797	9.67928	7.6823	7.66695	7.75261	7.84413	7.66113
10431935	Amigo2	adhesion molecule with Ig like domain 2	0	1.93	3.81055		9.14969	9.16089	9.20753	9.22424	9.15402	7.27136	7.19484	7.22503	7.42156	7.13691
10362314	Ptprk	protein tyrosine phosphatase, receptor type, K	0	1.93	3.81055		8.61605	8.41926	8.47473	8.4385	8.24043	6.50168	6.56934	6.44151	6.52677	6.49436
10363346	Ankrd57	ankyrin repeat domain 57	0	1.93	3.81055		9.53211	9.59701	9.52931	9.40265	9.44706	7.60151	7.43811	7.77105	7.55776	7.48412
10599693	Ncrna00086	non-protein coding RNA 86	0	1.93	3.81055		9.97481	9.71748	9.66588	9.60536	9.67681	7.88319	7.7132	7.69833	7.92431	7.7619
10511416	Tox	thymocyte selection-associated high mobility group box	0	1.93	3.81055		9.13085	8.74307	8.71979	9.002	8.99015	7.00952	7.09051	6.85061	7.01185	6.9554
10477004			0	1.93	3.81055		12.9024	12.9027	12.9226	12.5764	12.6968	11.0484	10.8829	11.0345	10.6974	10.68
10360648	Psen2	presenilin 2	0	1.93	3.81055		9.22685	8.93777	9.02406	8.87027	8.80447	7.19951	7.04418	6.73249	7.20755	7.04187
10517328	Tmem50a	transmembrane protein 50A	0	1.93	3.81055		11.8429	11.8259	11.7438	11.5594	11.3814	10.0258	9.72905	9.79337	9.61723	9.5226
10408331	Acot13	acyl-CoA thioesterase 13	0	1.93	3.81055		9.04213	8.77082	8.57024	9.34468	9.0528	7.04907	6.87896	6.83579	7.19917	7.18469
10362394	Hddc2	HD domain containing 2	0	1.93	3.81055		8.37719	8.43416	8.56425	8.72726	8.8942	6.53317	6.22224	6.66115	7.09052	6.84734
10503172	Chd7	chromodomain helicase DNA binding protein 7	0	1.93	3.81055		7.43395	6.84413	7.22515	7.66001	7.52564	5.50008	5.21146	5.52429	5.81734	5.00581
10478469	Svs5	seminal vesicle secretory protein 5	0	1.93	3.81055		7.75941	7.10465	7.35241	6.97689	6.96584	5.61215	5.61878	4.80386	5.43719	5.05762
10503196	Chd7	chromodomain helicase DNA binding protein 7	0	1.93	3.81055		8.84147	8.641	8.55968	9.35747	9.6059	6.93418	6.91426	6.84919	7.5829	7.06351
10560530	Bloc1s3	biogenesis of lysosome-related organelles complex-1, subunit 3	0.001	1.93	3.81055		10.1942	10.0803	10.1855	8.44162	8.67887	7.93066	7.85634	7.96301	7.07492	7.10378
10602772	Rps6ka3	ribosomal protein S6 kinase polypeptide 3	0	1.92	3.78423		9.75958	9.62992	9.74573	9.74315	9.70179	7.76345	7.69319	7.75649	7.93226	7.84396
10591905	Glb1l3	galactosidase, beta 1 like 3	0	1.92	3.78423		12.2466	12.3286	12.266	12.3739	12.2973	10.464	10.3306	10.2998	10.516	10.2818
10590909	Endod1	endonuclease domain containing 1	0	1.92	3.78423		8.26577	8.35878	8.43324	8.15896	8.4744	6.35325	6.42126	6.49341	6.36975	6.44769
10535938	N4bp2l1	NEDD4 binding protein 2-like 1	0	1.92	3.78423		8.97614	8.86265	8.7365	8.92969	8.91955	7.06859	6.83432	6.80948	7.0507	7.04364
10432527	Lass5	LAG1 homolog, ceramide synthase 5	0	1.92	3.78423		11.2095	11.1283	11.145	10.8866	10.9687	9.27621	8.99507	9.13428	9.19966	9.116
10436865	Ifngr2	interferon gamma receptor 2	0	1.92	3.78423		12.0882	11.8848	11.9481	11.7552	11.7338	10.1829	9.9611	9.895	9.92992	9.86128
10577226	2610019F03Rik	RIKEN cDNA 2610019F03 gene	0	1.92	3.78423		11.4052	11.2871	11.4275	11.6287	11.7028	9.63449	9.52156	9.41668	9.66419	9.59903
10467041	Asah2	N-acylsphingosine amidohydrolase 2	0	1.92	3.78423		8.91595	9.11593	9.087	9.30076	9.05415	7.00651	7.17711	7.16458	7.52493	6.97864
10607952	Vamp7	vesicle-associated membrane protein 7	0	1.92	3.78423		8.77995	8.7702	8.85419	9.08822	8.97071	7.16061	6.70515	6.76066	7.15857	7.08574
10607116	Ammecr1	Alport syndrome, mental retardation, midface hypoplasia and elliptocytosis chromosomal region gene 1 homolog (human)	0	1.92	3.78423		9.37252	9.07526	9.19175	9.36694	9.31084	7.27359	7.14664	7.07118	7.71679	7.49916
10519504	Sri	sorcin	0	1.92	3.78423		9.2333	9.13736	9.13478	8.7518	8.65022	7.16393	6.83611	7.18178	7.12293	6.99741
10413932	E130203B14Rik	RIKEN cDNA E130203B14 gene	0	1.92	3.78423		11.6734	11.568	11.7217	11.3124	11.2857	9.93982	9.65811	9.58782	9.4722	9.29941
10384656	B3gnt2	UDP-GlcNAc:betaGal beta-1,3-N-acetylglucosaminyltransferase 2	0	1.92	3.78423		8.38117	8.00684	7.9651	8.40616	8.40375	6.31757	6.07914	6.16861	6.34775	6.65487
10410124	Ctsl	cathepsin L	0	1.92	3.78423		13.2277	13.1332	13.2065	13.3518	13.3939	11.407	10.9053	11.346	11.7378	11.3208
10470775	Cercam	cerebral endothelial cell adhesion molecule	0	1.92	3.78423		8.37881	8.54404	8.33158	8.13808	8.71674	6.40432	6.44646	6.21536	6.52812	6.93489
10488642	Defb19	defensin beta 19	0	1.92	3.78423		12.6932	12.6106	12.5936	12.1949	12.2211	10.9216	10.6815	10.6545	10.2381	10.2203
10459730	Me2	malic enzyme 2, NAD(+)-dependent, mitochondrial	0	1.91	3.75809		10.8253	10.7795	10.9156	10.6697	10.8107	8.95484	8.81151	8.86886	8.90167	8.91285
10423520	Sema5a	sema domain, seven thrombospondin repeats (type 1 and type 1-like), transmembrane domain (TM) and short cytoplasmic domain, (semaphorin) 5A	0	1.91	3.75809		9.55127	9.47231	9.56614	9.64461	9.72469	7.5303	7.78869	7.68534	7.67577	7.74299
10399036	Uevld	UEV and lactate/malate dehyrogenase domains	0	1.91	3.75809		10.1277	10.0058	9.96319	9.91252	9.88656	8.08342	7.92676	8.01708	8.12118	8.20365
10502417	2410002F23Rik	RIKEN cDNA 2410002F23 gene	0	1.91	3.75809		10.2469	10.1821	10.2621	10.2277	10.0179	8.48621	8.18556	8.14452	8.4081	8.16698
10504349	Creb3	cAMP responsive element binding protein 3	0	1.91	3.75809		11.7953	11.9265	11.7488	11.5742	11.4625	9.91959	9.75886	9.87551	9.64247	9.76106
10393408	Tmc6	transmembrane channel-like gene family 6	0	1.91	3.75809		8.96873	9.077	9.06443	8.61974	8.82295	6.96987	7.05869	6.95233	6.87746	7.15125
10343927			0	1.91	3.75809		10.4441	10.2774	10.4766	10.6892	10.5811	8.73467	8.69361	8.34546	8.51798	8.6331
10477920	Myl9	myosin, light polypeptide 9, regulatory	0	1.91	3.75809		11.1839	11.2897	11.1906	11.3201	11.5077	9.45585	9.15269	9.21423	9.53624	9.56037
10400293	6530401N04Rik	RIKEN cDNA 6530401N04 gene	0	1.91	3.75809		9.80907	9.58076	9.83323	9.7915	9.92835	8.01023	7.60666	7.68581	8.12517	7.97965
10465853			0	1.91	3.75809		9.89735	9.91513	9.92554	10.0227	9.96839	8.22209	7.53299	7.95974	8.30671	8.1598
10553324	Tmem86a	transmembrane protein 86A	0	1.91	3.75809		10.7712	10.7705	10.9011	10.2597	10.3403	8.97366	8.60971	8.72196	8.63276	8.57057
10361282	Cr1l	complement component (3b/4b) receptor 1-like	0	1.91	3.75809		8.12841	7.95252	7.99746	8.55909	8.68908	6.43487	5.93666	6.13312	6.84707	6.44185
10340177			0	1.9	3.73213		13.2036	13.2658	13.1638	13.2849	13.3338	11.4136	11.2975	11.3599	11.3799	11.322
10505000	Nipsnap3b	nipsnap homolog 3B (C. elegans)	0	1.9	3.73213		8.71143	8.66547	8.55167	8.43236	8.59895	6.75071	6.64224	6.69743	6.73084	6.64964
10489759	Sulf2	sulfatase 2	0	1.9	3.73213		10.2781	10.1501	10.2151	10.0225	10.1098	8.36242	8.14533	8.20709	8.30625	8.25902
10431974	Rapgef3	Rap guanine nucleotide exchange factor (GEF) 3	0	1.9	3.73213		8.41261	8.31359	8.5516	8.42403	8.43612	6.49164	6.44616	6.523	6.46221	6.69681
10494445			0	1.9	3.73213		10.1858	9.89943	9.93108	9.87823	9.93771	8.03898	8.02253	7.97799	8.1803	8.10692
10494509	Pias3	protein inhibitor of activated STAT 3	0	1.9	3.73213		8.20496	8.36327	8.28434	8.50391	8.56686	6.47671	6.46014	6.50435	6.44823	6.52194
10603785	Fundc1	FUN14 domain containing 1	0	1.9	3.73213		8.52453	8.58824	8.32539	8.44128	8.36128	6.59329	6.36857	6.60103	6.6632	6.52023
10475708	Blvra	biliverdin reductase A	0	1.9	3.73213		10.9016	10.7243	10.6329	10.5566	10.6068	8.93353	8.72205	8.7999	8.70021	8.78133
10600765	Pcyt1b	phosphate cytidylyltransferase 1, choline, beta isoform	0	1.9	3.73213		8.68373	8.46873	8.2743	8.6275	8.38154	6.60953	6.61532	6.6005	6.46613	6.65103
10376889	Mmgt2	membrane magnesium transporter 2	0	1.9	3.73213		8.86342	8.93415	8.66446	8.99579	8.78077	7.1671	6.8058	6.78549	7.04734	6.91582
10538275	Nfe2l3	nuclear factor, erythroid derived 2, like 3	0	1.9	3.73213		8.48355	8.66714	8.39766	8.43703	8.32158	6.67383	6.65211	6.48469	6.29665	6.68521
10425801	Bik	BCL2-interacting killer	0	1.9	3.73213		8.84226	8.85499	8.54798	8.85151	8.60629	7.0694	6.69835	6.67727	6.84208	6.90892
10443021	Atp6v0e	ATPase, H+ transporting, lysosomal V0 subunit E	0	1.9	3.73213		11.2893	11.3403	11.2582	11.4355	11.4635	9.36517	9.29672	9.27514	9.63041	9.7151
10584435	Vwa5a	von Willebrand factor A domain containing 5A	0	1.9	3.73213		8.89289	8.90123	8.83813	8.43568	8.54495	6.85653	6.78249	6.88612	6.82777	6.76802
10429957	Fbxl6	F-box and leucine-rich repeat protein 6	0	1.9	3.73213		9.98875	10.0402	10.0499	10.1098	10.2766	8.21633	7.98051	7.98731	8.33053	8.42834
10442468	Caskin1	CASK interacting protein 1	0	1.9	3.73213		9.35894	9.2115	9.25382	9.65715	9.53831	7.34649	7.44001	7.68814	7.58808	7.48182
10394538	Acaca	acetyl-Coenzyme A carboxylase alpha	0	1.9	3.73213		11.3107	11.1655	11.2462	11.3643	11.3371	9.31727	9.22657	9.13461	9.61002	9.61702
10532368	Fbrsl1	fibrosin-like 1	0	1.9	3.73213		10.5336	10.1881	10.2378	10.6054	10.4965	8.5394	8.463	8.24508	8.7035	8.59834
10599650	Etd	embryonic testis differentiation	0	1.9	3.73213		7.27346	7.42992	7.0419	7.81634	7.61514	5.50776	5.42545	5.55999	5.65841	5.53826
10407707			0	1.9	3.73213		9.53317	9.19734	9.12938	9.555	9.46528	7.34797	7.25958	7.2908	7.84632	7.62213
10579142	Gm7730	predicted gene 7730	0	1.9	3.73213		10.5122	9.82211	9.81008	11.3616	10.6565	8.6341	8.21466	8.55007	8.92295	8.31743
10381187	Atp6v0a1	ATPase, H+ transporting, lysosomal V0 subunit A1	0	1.89	3.70635		10.8361	10.7418	10.8751	10.8495	10.7854	8.99035	8.82145	8.79556	9.0298	8.99758
10386058	Sparc	secreted acidic cysteine rich glycoprotein	0	1.89	3.70635		13.1106	13.0467	13.0229	13.0411	13.0931	11.2304	10.9886	11.0959	11.2726	11.2642
10586933	Nedd4	neural precursor cell expressed, developmentally down-regulated 4	0	1.89	3.70635		12.0054	12.0061	11.978	11.8995	11.91	10.2119	9.9417	9.91365	10.1753	10.1256
10480145	Rsu1	Ras suppressor protein 1	0	1.89	3.70635		9.74381	9.77731	9.79015	9.78825	9.98939	7.95942	7.8314	7.78885	8.10021	7.95266
10343379			0	1.89	3.70635		11.7076	11.6728	11.7953	11.8722	12.0147	9.98367	9.73278	9.82119	9.98574	10.0715
10472501	Lass6	LAG1 homolog, ceramide synthase 6	0	1.89	3.70635		9.7967	9.67928	9.71478	9.88212	9.83665	7.85071	7.69596	7.70283	8.14434	8.04374
10603492	Porcn	porcupine homolog (Drosophila)	0	1.89	3.70635		9.52519	9.28869	9.2459	8.96115	9.19434	7.42249	7.36766	7.29768	7.20115	7.45639
10595664	Tmed3	transmembrane emp24 domain containing 3	0	1.89	3.70635		10.825	10.698	10.6741	11.0012	11.0096	8.92763	8.69327	8.80088	9.18203	9.1533
10361771	Plagl1	pleiomorphic adenoma gene-like 1	0	1.89	3.70635		8.59143	8.54775	8.77379	8.67396	8.71318	6.98419	6.58132	6.4545	7.11561	6.72531
10575993	6430548M08Rik	RIKEN cDNA 6430548M08 gene	0	1.89	3.70635		9.68392	9.00808	9.04969	9.51732	9.26495	7.55043	7.37039	7.36889	7.55815	7.23161
10533875	Ncor2	nuclear receptor co-repressor 2	0	1.89	3.70635		9.92351	9.58523	9.54294	10.278	10.1425	7.94152	7.98452	7.94398	8.05923	8.09397
10555059	Kctd14	potassium channel tetramerisation domain containing 14	0	1.89	3.70635		8.41007	8.00065	8.03008	8.71219	8.52467	6.51654	6.25593	6.02391	6.74624	6.6675
10554574	Tm6sf1	transmembrane 6 superfamily member 1	0	1.88	3.68075		9.82415	9.81624	9.99654	9.8606	9.79088	7.95587	7.99311	7.857	8.0238	8.07271
10384603	Mdh1	malate dehydrogenase 1, NAD (soluble)	0	1.88	3.68075		10.9524	10.7851	10.8158	10.8731	10.9456	9.17525	8.92139	8.94282	8.9665	8.96623
10376690	Llgl1	lethal giant larvae homolog 1 (Drosophila)	0	1.88	3.68075		9.69056	9.47286	9.59555	9.50729	9.58341	7.71918	7.63988	7.5451	7.71064	7.82962
10537102	Exoc4	exocyst complex component 4	0	1.88	3.68075		9.67298	9.54202	9.45438	9.54469	9.5499	7.80753	7.52506	7.54857	7.74924	7.72739
10605493	Prrg1	proline rich Gla (G-carboxyglutamic acid) 1	0	1.88	3.68075		7.54352	7.58851	7.53181	7.71781	7.5432	5.6303	5.91242	5.71437	5.69037	5.57912
10487011	Gatm	glycine amidinotransferase (L-arginine:glycine amidinotransferase)	0	1.88	3.68075		13.1848	13.1006	13.1034	13.2113	13.1767	11.4857	11.1262	11.1964	11.3687	11.1787
10369210	Serinc1	serine incorporator 1	0	1.88	3.68075		12.763	12.8211	12.8347	12.5856	12.7074	11.086	10.7692	10.8516	10.8648	10.7307
10410465	BC018507	cDNA sequence BC018507	0	1.88	3.68075		9.44952	9.20913	9.37173	9.18247	9.3617	7.43757	7.31022	7.23472	7.661	7.53283
10604424	Zfp280c	zinc finger protein 280C	0	1.88	3.68075		9.81714	9.61327	9.62525	9.52438	9.65476	7.99135	7.62944	7.54043	7.8494	7.83099
10448081	Rgmb	RGM domain family, member B	0	1.88	3.68075		9.47726	9.28252	9.28153	9.08219	9.11651	7.56712	7.27467	7.37989	7.51025	7.12632
10576386	Rhou	ras homolog gene family, member U	0	1.88	3.68075		10.379	10.1579	10.2332	10.0088	9.73664	8.3291	8.23839	8.18052	8.27831	8.11122
10345762	Il1r1	interleukin 1 receptor, type I	0	1.88	3.68075		9.57358	9.45467	9.44063	9.34777	9.52925	7.90018	7.37764	7.31258	7.60658	7.75967
10452935	Heatr5b	HEAT repeat containing 5B	0	1.88	3.68075		6.62513	6.34802	6.32318	6.2046	6.13985	4.65212	4.34488	4.41775	4.61796	4.18955
10476648	Dstn	destrin	0	1.88	3.68075		10.5883	10.5214	10.5363	11.0067	10.9689	8.79777	8.67598	8.78267	8.9425	9.00414
10606876	Morf4l2	mortality factor 4 like 2	0	1.88	3.68075		9.8855	9.7019	9.76435	10.0328	10.0005	8.17457	7.64932	7.84775	8.24631	8.07611
10354494	Nab1	Ngfi-A binding protein 1	0	1.88	3.68075		9.49056	9.28141	9.34704	9.76578	9.64664	7.53283	7.37081	7.51928	7.84399	7.85129
10492499	Mfsd1	major facilitator superfamily domain containing 1	0	1.88	3.68075		10.6794	10.6693	10.6301	10.1922	10.1587	8.77883	8.51816	8.61242	8.56313	8.43608
10493995	S100a10	S100 calcium binding protein A10 (calpactin)	0	1.88	3.68075		10.3428	10.6969	10.7959	10.0821	10.3607	8.59408	8.57476	8.68224	8.72795	8.32422
10381082	Rara	retinoic acid receptor, alpha	0	1.88	3.68075		9.57457	9.33664	9.41397	9.94646	9.89934	7.68854	7.74576	7.5077	8.01241	7.80759
10510254	Fv1	Friend virus susceptibility 1	0	1.88	3.68075		8.79168	9.56911	9.29103	8.68808	9.17939	7.31392	7.19302	7.18664	7.46569	6.96543
10492522	Schip1	schwannomin interacting protein 1	0	1.88	3.68075		9.46873	9.487	9.61158	8.95889	8.98164	7.72306	7.75793	7.52435	6.9499	7.17219
10596072	Ppp2r3a	protein phosphatase 2, regulatory subunit B'', alpha	0	1.87	3.65533		8.80698	8.65096	8.66352	8.65129	8.8492	6.82195	6.74031	6.79196	6.94588	6.98997
10521031	Ywhah	tyrosine 3-monooxygenase/tryptophan 5-monooxygenase activation protein, eta polypeptide	0	1.87	3.65533		12.0114	11.7526	11.7303	11.982	11.9748	10.0533	9.98553	9.93263	10.0609	10.0808
10536762	Snd1	staphylococcal nuclease and tudor domain containing 1	0	1.87	3.65533		10.446	10.4313	10.5503	10.3601	10.3107	8.68181	8.34209	8.49051	8.65069	8.57056
10425161	Lgals1	lectin, galactose binding, soluble 1	0	1.87	3.65533		11.9746	12.0727	11.8723	12.1586	12.0541	10.1627	10.0247	10.0343	10.2919	10.2928
10343933			0	1.87	3.65533		11.1698	11.0031	11.2022	11.0052	10.9879	9.36032	8.95927	9.11161	9.29358	9.27351
10434925	Hes1	hairy and enhancer of split 1 (Drosophila)	0	1.87	3.65533		9.17072	9.08457	9.15848	8.99436	8.88998	7.37034	7.18662	7.19798	7.38452	6.82624
10530819	Hopx	HOP homeobox	0	1.87	3.65533		9.18558	8.79365	8.81263	9.00756	9.19315	7.22593	6.87018	7.03812	7.3404	7.18723
10405174	Nxnl2	nucleoredoxin-like 2	0	1.87	3.65533		8.87051	8.77582	8.78042	8.41396	8.3015	6.84816	6.89934	6.92073	6.60131	6.53461
10538842	Gng12	guanine nucleotide binding protein (G protein), gamma 12	0	1.86	3.63008		10.8256	10.8427	10.8354	10.5465	10.7419	8.97506	8.83295	8.88931	8.89729	8.90851
10421648	Slc25a30	solute carrier family 25, member 30	0	1.86	3.63008		11.0307	10.9385	10.907	10.9794	11.0173	9.23551	8.92351	9.06032	9.21946	9.13142
10598678	Usp9x	ubiquitin specific peptidase 9, X chromosome	0	1.86	3.63008		12.1838	12.0153	12.0031	12.0881	12.0851	10.381	10.1378	10.0581	10.2906	10.2187
10549497	Fam60a	family with sequence similarity 60, member A	0	1.86	3.63008		10.5292	10.4413	10.3275	10.5699	10.5168	8.66834	8.44562	8.54417	8.72903	8.68708
10384725	Rel	reticuloendotheliosis oncogene	0	1.86	3.63008		9.69712	9.52873	9.65844	9.45468	9.51112	7.79302	7.67814	7.54149	7.7195	7.83809
10393341	Rhbdf2	rhomboid 5 homolog 2 (Drosophila)	0	1.86	3.63008		8.87366	8.86126	9.00928	8.75918	8.69085	6.89876	7.12019	6.94919	6.87793	7.03295
10385926	Cdc42se2	CDC42 small effector 2	0	1.86	3.63008		11.5851	11.4534	11.5071	11.4816	11.4743	9.88482	9.59256	9.66508	9.56677	9.4768
10359428	Aph1a	anterior pharynx defective 1a homolog (C. elegans)	0	1.86	3.63008		10.344	10.1681	10.4144	10.2711	10.2486	8.43699	8.33366	8.2908	8.64994	8.4431
10573583	Man2b1	mannosidase 2, alpha B1	0	1.86	3.63008		11.0063	10.8158	10.9424	10.6758	10.7346	9.13213	8.87927	8.95043	8.91704	9.00817
10383932	Gas2l1	growth arrest-specific 2 like 1	0	1.86	3.63008		10.9391	10.6591	10.8556	10.8366	10.8636	8.90677	8.86125	8.89641	9.19834	9.01462
10600485	Dkc1	dyskeratosis congenita 1, dyskerin homolog (human)	0	1.86	3.63008		8.67196	8.84151	8.95322	8.69783	8.82815	7.00251	6.71388	6.97467	7.05522	6.92492
10575534	St3gal2	ST3 beta-galactoside alpha-2,3-sialyltransferase 2	0	1.86	3.63008		9.07779	8.75795	8.85945	8.92294	8.73433	6.98868	6.93783	6.94152	7.22211	6.95837
10359525	Bat2l2	HLA-B associated transcript 2-like 2	0	1.86	3.63008		11.0414	10.8659	10.9147	11.1316	11.1274	9.16687	9.03915	8.92003	9.35075	9.29572
10575619	Terf2ip	telomeric repeat binding factor 2, interacting protein	0	1.86	3.63008		8.50136	8.32984	8.48579	8.79529	8.73088	6.70542	6.5435	6.65934	6.88759	6.75842
10586744	Anxa2	annexin A2	0	1.86	3.63008		11.5856	11.5983	11.5966	11.7498	11.8725	9.51491	9.81011	9.88706	9.8198	10.0622
10338180			0	1.86	3.63008		11.4653	11.5432	11.5734	11.6878	11.9113	9.78065	9.75288	9.62413	10.072	9.64023
10530612	Fryl	furry homolog-like (Drosophila)	0	1.86	3.63008		10.5681	10.2208	10.2064	10.4997	10.2676	8.58203	8.26347	8.31429	8.73709	8.56885
10411709	Cdk7	cyclin-dependent kinase 7	0	1.86	3.63008		7.95873	7.91339	7.85146	8.10888	8.30516	6.32149	5.93093	5.95174	6.28371	6.34265
10463200	Dhdpsl	dihydrodipicolinate synthase-like, mitochondrial	0	1.86	3.63008		8.45423	8.26396	7.9821	7.78708	8.5354	6.37699	6.18527	6.29862	6.24929	6.60222
10606792	Nxf7	nuclear RNA export factor 7	0	1.86	3.63008		6.72015	6.45369	5.7123	6.72748	6.28595	4.7077	4.6635	4.30673	4.3602	4.53831
10402066	Foxn3	forkhead box N3	0	1.85	3.605		9.16273	9.00855	9.07524	9.1178	8.98778	7.36776	7.16356	7.17343	7.17725	7.22005
10431856	Srsf2ip	serine/arginine-rich splicing factor 2, interacting protein	0	1.85	3.605		10.4472	10.3238	10.4701	10.2671	10.3385	8.57955	8.39989	8.42531	8.52087	8.66008
10372716	Rap1b	RAS related protein 1b	0	1.85	3.605		11.9282	11.689	11.7471	11.8472	11.7916	10.0692	9.82162	9.84263	10.0362	10.0057
10339354			0	1.85	3.605		10.6798	10.511	10.6231	10.2891	10.4579	8.67243	8.61877	8.67516	8.66205	8.70707
10467470	Aldh18a1	aldehyde dehydrogenase 18 family, member A1	0	1.85	3.605		8.93128	9.26051	9.3314	9.15117	9.20466	7.31196	7.35573	7.22685	7.3337	7.39126
10477970	Src	Rous sarcoma oncogene	0	1.85	3.605		9.34114	9.33894	9.30391	9.69539	9.48874	7.53691	7.56175	7.52996	7.62852	7.67682
10411223	S100z	S100 calcium binding protein, zeta	0	1.85	3.605		7.15458	7.31503	6.97081	7.22541	7.03834	5.17865	5.31917	5.43395	5.15193	5.37772
10359754	Mpzl1	myelin protein zero-like 1	0	1.85	3.605		11.6121	11.401	11.4213	11.6158	11.5572	9.74722	9.42121	9.51133	9.91378	9.78147
10342405			0	1.85	3.605		8.83712	8.81156	8.46337	8.89952	8.85754	6.99225	6.79333	7.10321	7.05139	6.69953
10503176	Chd7	chromodomain helicase DNA binding protein 7	0	1.85	3.605		9.46438	9.20116	9.12228	9.24626	9.22234	7.72813	7.51	7.37955	7.39891	6.99564
10554118	Fam169b	family with sequence similarity 169, member B	0	1.85	3.605		7.37442	7.50239	7.09103	7.31473	6.90133	5.53446	5.69555	5.14741	5.23751	5.31241
10356299	Gpr55	G protein-coupled receptor 55	0	1.85	3.605		8.3415	8.32274	8.20435	8.06056	7.66726	6.35559	6.1489	6.18501	6.11452	6.56332
10601569	Pcdh11x	protocadherin 11 X-linked	0	1.85	3.605		6.80085	6.82371	6.90923	6.84397	6.22986	4.4235	5.25275	5.01815	4.68928	4.98604
10440099	St3gal6	ST3 beta-galactoside alpha-2,3-sialyltransferase 6	0	1.84	3.5801		9.74343	9.55276	9.58424	9.58662	9.41734	7.84208	7.66238	7.68395	7.78951	7.69134
10494312	Aph1a	anterior pharynx defective 1a homolog (C. elegans)	0	1.84	3.5801		10.1205	9.93759	10.188	10.0469	10.0241	8.24874	8.12397	8.09725	8.42388	8.2165
10484318	Nckap1	NCK-associated protein 1	0	1.84	3.5801		12.0736	11.9713	12.0226	11.8723	11.9035	10.3806	10.0971	10.1282	10.0282	10.014
10601903	Zcchc18	zinc finger, CCHC domain containing 18	0	1.84	3.5801		8.38929	8.67874	8.41286	8.24205	8.31822	6.54727	6.66153	6.49827	6.53127	6.61474
10341240			0	1.84	3.5801		11.0577	10.7399	10.9109	10.6822	10.7961	9.138	9.02091	8.8856	8.89556	9.03504
10453629	9430020K01Rik	RIKEN cDNA 9430020K01 gene	0	1.84	3.5801		11.6554	11.5745	11.5207	11.7023	11.7865	9.71886	9.71177	9.64632	9.90033	10.0708
10577025	Rab20	RAB20, member RAS oncogene family	0	1.84	3.5801		9.68196	9.57618	9.57758	9.32038	9.34711	7.77768	7.68839	7.79554	7.56927	7.48938
10339754			0	1.84	3.5801		11.5593	11.4037	11.6061	11.5204	11.5225	9.51852	9.73989	9.37996	9.92244	9.87316
10364984	Zbtb7a	zinc finger and BTB domain containing 7a	0	1.84	3.5801		8.63201	8.31785	8.33208	8.52497	8.18548	6.65114	6.33805	6.37989	6.74411	6.68171
10446777	Ehd3	EH-domain containing 3	0	1.84	3.5801		9.36374	9.14374	9.16095	8.83659	8.78569	7.21016	7.27909	7.40022	7.07969	7.14605
10397853	Rin3	Ras and Rab interactor 3	0	1.84	3.5801		8.68923	8.37526	8.60053	9.01066	9.03369	6.86282	6.93805	6.6437	6.99447	7.06088
10534168	Auts2	autism susceptibility candidate 2	0	1.84	3.5801		8.33188	8.04835	7.9819	8.72707	8.47424	6.34893	6.27038	6.40939	6.73752	6.61363
10419874	Slc22a17	solute carrier family 22 (organic cation transporter), member 17	0	1.84	3.5801		9.77486	9.69735	9.35943	8.88421	9.27243	7.76749	7.79362	7.36306	7.34542	7.50305
10422781	Rictor	RPTOR independent companion of MTOR, complex 2	0	1.83	3.55537		10.5219	10.4283	10.4538	10.3546	10.3491	8.65595	8.47966	8.51786	8.66296	8.65727
10355871	Obsl1	obscurin-like 1	0	1.83	3.55537		9.90414	9.87936	9.98656	9.90733	9.85696	7.91186	7.96485	8.11825	8.19077	8.17467
10359161	Soat1	sterol O-acyltransferase 1	0	1.83	3.55537		12.1945	12.1992	12.2631	12.061	12.1284	10.5062	10.2926	10.3892	10.2989	10.2146
10350742	Rnasel	ribonuclease L (2', 5'-oligoisoadenylate synthetase-dependent)	0	1.83	3.55537		7.90574	7.69119	7.67145	7.66909	7.60532	6.03436	5.84522	5.83727	5.88879	5.77361
10507612	Lepre1	leprecan 1	0	1.83	3.55537		9.22828	9.05113	9.01673	9.24702	8.99761	7.33105	7.30814	7.11541	7.34737	7.28944
10595327	Phip	pleckstrin homology domain interacting protein	0	1.83	3.55537		10.1118	10.0097	10.1433	9.87646	10.0401	8.21784	8.0844	8.08494	8.28691	8.33882
10408656	Peci	peroxisomal delta3, delta2-enoyl-Coenzyme A isomerase	0	1.83	3.55537		9.40395	9.16421	9.13963	9.39231	9.18441	7.63642	7.27253	7.39334	7.44918	7.37081
10495083	Kcnd3	potassium voltage-gated channel, Shal-related family, member 3	0	1.83	3.55537		8.82458	8.91316	8.90029	9.07061	8.77503	7.01585	7.02204	6.87468	7.25946	7.17927
10577903	4930444A02Rik	RIKEN cDNA 4930444A02 gene	0	1.83	3.55537		8.72477	8.60113	8.66406	8.78466	8.85723	6.74577	6.91688	6.89667	7.17368	6.76573
10451495	Ubr2	ubiquitin protein ligase E3 component n-recognin 2	0	1.83	3.55537		9.90621	9.6644	9.67812	9.82465	9.80695	7.92852	7.79139	7.74988	8.11269	8.12299
10553913	Mcee	methylmalonyl CoA epimerase	0	1.83	3.55537		9.6712	9.47138	9.47391	9.59929	9.52565	7.83503	7.45439	7.54825	8.0367	7.7271
10436392	Cpox	coproporphyrinogen oxidase	0	1.83	3.55537		9.10548	9.03724	9.13502	8.64296	8.82795	7.1448	6.85532	7.23514	7.06353	7.29119
10554938	Rab30	RAB30, member RAS oncogene family	0	1.83	3.55537		7.89494	7.56621	7.52595	7.65465	7.65644	6.05433	5.81923	5.88252	5.97303	5.41145
10343351			0	1.83	3.55537		11.5379	11.4033	11.5536	11.05	11.217	9.79545	9.28029	9.51931	9.41956	9.60624
10402063	Foxn3	forkhead box N3	0	1.83	3.55537		9.67686	9.5236	9.51101	10.0561	9.84679	7.90654	7.64231	7.76995	7.99671	8.15682
10500808	Olfml3	olfactomedin-like 3	0	1.83	3.55537		9.65294	9.30528	9.46876	9.74607	9.46529	7.62934	7.49782	7.46282	8.09123	7.81622
10592515	Ubash3b	ubiquitin associated and SH3 domain containing, B	0	1.83	3.55537		8.72584	8.30165	8.04564	8.33273	8.13765	6.27215	6.56282	6.68389	6.29309	6.60155
10503180	Chd7	chromodomain helicase DNA binding protein 7	0	1.83	3.55537		8.73293	8.56672	8.62284	9.04772	8.93392	7.04375	6.74844	6.89456	7.35371	6.69431
10558439	Phgdh	3-phosphoglycerate dehydrogenase	0	1.83	3.55537		10.1672	10.0807	10.2025	10.6699	10.7433	8.56001	8.31918	8.28946	8.84278	8.71306
10542470	Mgst1	microsomal glutathione S-transferase 1	0	1.83	3.55537		10.3346	10.4052	10.3992	10.8774	11.1103	8.80393	8.53211	8.44993	9.06218	9.11044
10456140	Sh3tc2	SH3 domain and tetratricopeptide repeats 2	0	1.82	3.53081		9.34792	9.31518	9.32899	9.31066	9.3042	7.45788	7.45249	7.41708	7.56263	7.60411
10604633	Cxx1b	CAAX box 1 homolog B (human)	0	1.82	3.53081		9.37276	9.34762	9.39293	9.35582	9.36193	7.43537	7.52634	7.48365	7.56739	7.7219
10582925	Alkbh8	alkB, alkylation repair homolog 8 (E. coli)	0	1.82	3.53081		8.76013	8.83901	8.82618	8.61164	8.60798	6.88043	6.83821	6.90716	6.96717	6.96484
10482824	Acvr1	activin A receptor, type 1	0	1.82	3.53081		8.39994	8.24958	8.29266	8.45674	8.5426	6.64647	6.58962	6.55535	6.51442	6.51527
10514590	Dock7	dedicator of cytokinesis 7	0	1.82	3.53081		11.6342	11.5431	11.6663	11.5147	11.6038	9.88588	9.62184	9.66487	9.84949	9.8377
10507726	Cited4	Cbp/p300-interacting transactivator, with Glu/Asp-rich carboxy-terminal domain, 4	0	1.82	3.53081		9.89184	9.81023	9.68264	9.63999	9.51789	7.95275	7.86284	7.90647	7.8683	7.87045
10386665	Slc47a2	solute carrier family 47, member 2	0	1.82	3.53081		11.8563	11.79	11.7577	11.5408	11.5531	9.96129	9.7896	9.93091	9.84163	9.87521
10580957	Slc38a7	solute carrier family 38, member 7	0	1.82	3.53081		8.56387	8.69494	8.69216	8.38326	8.76598	6.69685	6.74876	6.80416	6.89225	6.83455
10447395	Msh2	mutS homolog 2 (E. coli)	0	1.82	3.53081		9.04316	9.09328	9.08818	8.99414	9.21121	7.40205	6.98194	7.35223	7.28534	7.30459
10522712	Rest	RE1-silencing transcription factor	0	1.82	3.53081		10.1036	9.96023	9.95764	10.0152	10.154	8.13431	8.18452	8.01181	8.46582	8.31445
10534426	Fzd9	frizzled homolog 9 (Drosophila)	0	1.82	3.53081		8.96774	9.06348	9.09174	8.77088	8.74816	7.17806	7.22221	7.099	6.87656	7.17607
10370911	Klf16	Kruppel-like factor 16	0	1.82	3.53081		10.2169	10.2751	10.4067	9.95943	9.94518	8.43951	8.38875	8.28299	8.42529	8.15574
10497490			0	1.82	3.53081		7.38015	7.59061	7.51667	7.18734	7.40829	5.88322	5.409	5.48916	5.59866	5.59061
10554094	Igf1r	insulin-like growth factor I receptor	0	1.82	3.53081		9.66662	9.36955	9.46919	9.66848	9.71677	7.68504	7.55562	7.65134	7.99785	7.91319
10409261	Diras2	DIRAS family, GTP-binding RAS-like 2	0	1.82	3.53081		8.91527	9.05989	8.9787	8.4609	8.77477	7.02857	7.27958	6.95148	6.80489	7.03764
10503194	Chd7	chromodomain helicase DNA binding protein 7	0	1.82	3.53081		8.62519	8.49265	8.34215	9.16494	9.14403	6.86684	6.59242	6.68682	7.33921	7.18424
10496605	Ccbl2	cysteine conjugate-beta lyase 2	0	1.81	3.50642		9.37304	9.40371	9.40735	9.39429	9.36288	7.47392	7.55156	7.65172	7.61385	7.5817
10378802	Blmh	bleomycin hydrolase	0	1.81	3.50642		10.4433	10.4406	10.3789	10.3724	10.3863	8.61447	8.49064	8.58898	8.67316	8.60364
10442057	Riok2	RIO kinase 2 (yeast)	0	1.81	3.50642		9.99527	9.87743	9.95573	9.95168	10.0854	8.20052	8.05496	8.18177	8.19448	8.19442
10600512	Brcc3	BRCA1/BRCA2-containing complex, subunit 3	0	1.81	3.50642		8.83548	8.76121	8.73329	8.67818	8.85387	7.0073	6.96479	6.93775	6.84155	7.03824
10538526	Avl9	AVL9 homolog (S. cerevisiase)	0	1.81	3.50642		10.7702	10.5397	10.5422	10.7257	10.5902	8.957	8.75765	8.76626	8.78523	8.85563
10471171	Fubp3	far upstream element (FUSE) binding protein 3	0	1.81	3.50642		10.6774	10.5553	10.6598	10.7049	10.7113	9.00398	8.63456	8.80537	8.91952	8.90017
10605465	Prkx	protein kinase, X-linked	0	1.81	3.50642		9.76814	9.61981	9.56412	9.43789	9.33985	7.69982	7.69528	7.76091	7.70601	7.79638
10440406	Nrip1	nuclear receptor interacting protein 1	0	1.81	3.50642		8.82201	8.73907	8.79942	8.77443	8.82265	6.80687	6.81479	6.90274	7.20008	7.15828
10411532	Mccc2	methylcrotonoyl-Coenzyme A carboxylase 2 (beta)	0	1.81	3.50642		9.83761	9.5785	9.58579	9.55708	9.5035	7.93744	7.72455	7.74034	7.97179	7.62266
10566326	Trim12	tripartite motif-containing 12	0	1.81	3.50642		7.26722	7.15304	7.08066	7.28647	7.30495	5.66883	5.27032	5.0727	5.62688	5.41778
10473160	Ssfa2	sperm specific antigen 2	0	1.81	3.50642		9.8204	9.54779	9.5661	10.0116	10.0237	8.07685	8.01493	7.73691	8.0979	7.98114
10605055	Haus7	HAUS augmin-like complex, subunit 7	0	1.81	3.50642		9.79544	9.73733	9.79604	10.0866	10.2205	8.10647	7.86749	8.00915	8.28528	8.31633
10536401	Nxph1	neurexophilin 1	0	1.81	3.50642		8.65736	8.30988	8.20388	8.26418	7.92421	6.57286	6.59537	6.45049	6.27586	6.42865
10497817	Anxa5	annexin A5	0	1.81	3.50642		10.6481	10.8303	10.7664	10.3921	10.4439	9.13557	8.8116	8.79806	8.75887	8.50436
10503222	Chd7	chromodomain helicase DNA binding protein 7	0	1.81	3.50642		7.81173	7.65835	7.60998	7.98082	8.11714	6.11226	5.65432	5.99576	6.33709	6.05221
10400072	Scin	scinderin	0	1.81	3.50642		6.70443	7.05906	6.45272	6.83452	6.23482	5.16598	4.92731	4.77497	4.692	4.69797
10458589	Prelid2	PRELI domain containing 2	0	1.81	3.50642		6.55371	6.48019	6.32128	6.83488	6.86274	4.25514	4.84417	5.1032	4.99561	4.80451
10503218	Chd7	chromodomain helicase DNA binding protein 7	0	1.81	3.50642		8.56697	8.44524	8.35166	8.89708	9.13726	6.84365	6.8967	6.56498	7.34027	6.70963
10503202	Chd7	chromodomain helicase DNA binding protein 7	0	1.81	3.50642		8.30855	8.05809	7.84404	8.63845	8.87019	6.41219	6.40548	6.18752	6.9905	6.6651
10572838	Sin3b	transcriptional regulator, SIN3B (yeast)	0	1.8	3.4822		11.8074	11.8304	11.838	11.6602	11.8152	9.97526	9.95904	10.0333	9.96175	10.0053
10562500	Dpy19l3	dpy-19-like 3 (C. elegans)	0	1.8	3.4822		8.83862	8.8008	8.75644	8.77224	8.81854	7.10439	6.95891	6.87915	7.06447	6.98217
10446833	Birc6	baculoviral IAP repeat-containing 6	0	1.8	3.4822		10.5116	10.4995	10.5413	10.3915	10.4324	8.73052	8.59542	8.51872	8.77682	8.75863
10588454	Wdr82	WD repeat domain containing 82	0	1.8	3.4822		11.7047	11.5515	11.654	11.4593	11.5363	9.94947	9.69877	9.79605	9.67188	9.77206
10525419	P2rx7	purinergic receptor P2X, ligand-gated ion channel, 7	0	1.8	3.4822		8.92323	9.00047	8.98469	8.66437	8.76622	7.21799	6.96567	6.95401	7.1366	7.06603
10362829	Ostm1	osteopetrosis associated transmembrane protein 1	0	1.8	3.4822		9.40368	9.3941	9.36609	9.09675	9.4902	7.73799	7.47104	7.32153	7.67817	7.53103
10343509			0	1.8	3.4822		11.2213	10.8811	11.0355	10.7083	10.7872	9.24736	8.95023	9.20113	9.2241	9.02773
10410695	Rhobtb3	Rho-related BTB domain containing 3	0	1.8	3.4822		10.533	10.3019	10.4639	10.1276	10.2103	8.56302	8.36162	8.80841	8.55006	8.32958
10344447			0	1.8	3.4822		10.5983	10.605	10.6101	10.8048	10.9886	8.91485	8.73581	8.69214	9.24581	9.02216
10344446			0	1.8	3.4822		7.87576	7.60656	7.2223	6.85932	6.6506	5.00199	5.44069	5.20291	5.74693	5.84555
10556658	9030624J02Rik	RIKEN cDNA 9030624J02 gene	0	1.79	3.45815		11.1094	11.1278	11.1716	10.9871	11.0199	9.31787	9.17243	9.29896	9.32336	9.34772
10370721	Sbno2	strawberry notch homolog 2 (Drosophila)	0	1.79	3.45815		9.61747	9.35615	9.41019	9.43274	9.42749	7.60402	7.58028	7.58479	7.77477	7.73059
10475912	Tmem87b	transmembrane protein 87B	0	1.79	3.45815		10.4822	10.4926	10.5702	10.3195	10.3658	8.83737	8.62784	8.62157	8.53548	8.67168
10386551	Flii	flightless I homolog (Drosophila)	0	1.79	3.45815		10.4917	10.4177	10.459	10.4121	10.3964	8.59977	8.58226	8.44864	8.79373	8.79298
10576661	Itgb1	integrin beta 1 (fibronectin receptor beta)	0	1.79	3.45815		10.8574	10.7855	10.7895	10.7278	10.7409	9.18228	8.78613	8.84745	9.13778	9.0095
10495549	Dbt	dihydrolipoamide branched chain transacylase E2	0	1.79	3.45815		9.38082	9.41685	9.31456	9.33093	9.43321	7.70458	7.33698	7.43154	7.71349	7.72509
10540650	Arpc4	actin related protein 2/3 complex, subunit 4	0	1.79	3.45815		9.83812	9.76983	9.80724	9.83463	9.96342	8.0118	7.77346	8.06503	8.14793	8.28532
10449452	Fkbp5	FK506 binding protein 5	0	1.79	3.45815		11.3098	11.1074	11.0165	11.2738	11.178	9.39708	9.15007	9.31941	9.63541	9.42457
10375240	Hspd1	heat shock protein 1 (chaperonin)	0	1.79	3.45815		11.3568	11.144	11.1771	11.0733	11.171	9.54825	9.12206	9.29828	9.56207	9.4662
10339849			0	1.79	3.45815		11.6001	11.4434	11.5819	11.5152	11.4498	9.95817	9.70452	9.51614	9.93635	9.54888
10458843	Sema6a	sema domain, transmembrane domain (TM), and cytoplasmic domain, (semaphorin) 6A	0	1.79	3.45815		7.71733	7.66699	7.77935	7.65778	7.98534	5.72262	6.17656	6.10033	5.83476	6.04257
10508465	Marcksl1	MARCKS-like 1	0	1.79	3.45815		12.1306	12.0573	11.9823	11.7879	11.7795	10.3421	10.2537	10.153	10.1791	9.87201
10402761	Tmem179	transmembrane protein 179	0	1.79	3.45815		9.08077	9.08923	8.80071	8.74159	8.55912	7.22775	7.17087	7.01269	6.73911	7.15956
10375713	Mgat4b	mannoside acetylglucosaminyltransferase 4, isoenzyme B	0	1.79	3.45815		9.88532	9.52497	9.51179	10.3816	10.087	8.12867	7.82285	7.94566	8.27657	8.24412
10361366	Mtrf1l	mitochondrial translational release factor 1-like	0	1.79	3.45815		8.00787	7.47941	7.39513	8.22862	7.98282	6.18184	5.73954	5.78698	6.28003	6.1481
10454741	Kdm3b	KDM3B lysine (K)-specific demethylase 3B	0	1.78	3.43426		11.1798	11.1215	11.1276	11.1423	11.1684	9.31916	9.3062	9.2729	9.38029	9.54495
10340752			0	1.78	3.43426		11.3513	11.1791	11.3141	11.1385	11.1371	9.48143	9.33463	9.47408	9.41773	9.49334
10485294	Hsd17b12	hydroxysteroid (17-beta) dehydrogenase 12	0	1.78	3.43426		10.667	10.5285	10.5295	10.4857	10.5287	8.91788	8.64457	8.68956	8.79517	8.80989
10370559	Mier2	mesoderm induction early response 1, family member 2	0	1.78	3.43426		9.61002	9.5057	9.49019	9.67996	9.78334	7.83937	7.8061	7.7511	7.95029	7.83853
10444578	Neu1	neuraminidase 1	0	1.78	3.43426		8.42643	8.57288	8.4237	8.37503	8.34458	6.64341	6.4676	6.71579	6.77902	6.61798
10607497	Suclg2	succinate-Coenzyme A ligase, GDP-forming, beta subunit	0	1.78	3.43426		10.408	10.4848	10.5289	10.3341	10.4056	8.7893	8.45937	8.4579	8.80868	8.7222
10529410	Mfsd10	major facilitator superfamily domain containing 10	0	1.78	3.43426		9.47526	9.42067	9.59047	9.10449	9.28822	7.57761	7.62792	7.55061	7.5538	7.69336
10339495			0	1.78	3.43426		12.052	12.0079	12.0408	12.0628	12.2432	10.4264	10.0468	10.2155	10.5611	10.2664
10412844	Top2b	topoisomerase (DNA) II beta	0	1.78	3.43426		9.95856	9.89077	9.94267	10.0488	10.0827	8.35043	7.90489	8.01924	8.3961	8.32969
10437590	Carhsp1	calcium regulated heat stable protein 1	0	1.78	3.43426		10.6221	10.4684	10.6103	10.9905	10.8809	8.90766	8.75966	8.90423	9.01819	9.09309
10377550	Trp53	transformation related protein 53	0	1.78	3.43426		9.64246	9.26803	9.50702	9.73097	9.76258	7.63426	7.7473	7.6816	8.0191	7.94962
10340055			0	1.78	3.43426		10.9706	10.8083	10.8265	10.478	10.8483	8.83522	8.93786	8.80505	9.16493	9.27988
10514275	Ptplad2	protein tyrosine phosphatase-like A domain containing 2	0	1.78	3.43426		7.44391	7.45059	7.30813	7.16131	6.92769	5.66198	5.70773	5.46235	5.38646	5.19529
10485340	Itpa	inosine triphosphatase (nucleoside triphosphate pyrophosphatase)	0	1.78	3.43426		11.3876	11.2434	11.3526	11.5646	11.6324	9.52117	9.32398	9.54577	9.94682	9.94648
10372682	Slc35e3	solute carrier family 35, member E3	0	1.78	3.43426		9.0188	9.48024	9.35725	9.02541	9.13188	7.54848	7.6992	7.17127	7.58457	7.09185
10339940			0	1.78	3.43426		8.40633	7.86811	8.2426	8.54399	8.62442	6.85081	6.12871	6.68721	6.46113	6.67151
10425852	Parvb	parvin, beta	0	1.78	3.43426		7.35673	8.02301	7.94872	8.29193	8.5378	5.99622	6.07095	6.31072	6.37554	6.50428
10338472			0	1.77	3.41054		13.5531	13.5648	13.6211	13.4715	13.5253	11.8332	11.7131	11.7126	11.9132	11.7322
10601011	Kif4	kinesin family member 4	0	1.77	3.41054		8.46728	8.37783	8.26878	8.25737	8.17949	6.63462	6.55062	6.42388	6.54414	6.55029
10559436	Mboat7	membrane bound O-acyltransferase domain containing 7	0	1.77	3.41054		9.2888	9.35245	9.29803	9.103	9.25094	7.55039	7.62702	7.42788	7.48636	7.36429
10550931	Irgq	immunity-related GTPase family, Q	0	1.77	3.41054		8.02624	8.15195	8.11434	8.17155	8.40451	6.50767	6.31636	6.2986	6.43811	6.47588
10528238	Phtf2	putative homeodomain transcription factor 2	0	1.77	3.41054		9.82256	9.46761	9.4842	9.67641	9.44238	7.82848	7.79709	7.75229	7.89251	7.75369
10571399	Zdhhc2	zinc finger, DHHC domain containing 2	0	1.77	3.41054		9.9643	9.9495	10.0224	9.94568	10.0163	8.17656	8.23415	8.32567	7.9274	8.38353
10451167	Tmem63b	transmembrane protein 63b	0	1.77	3.41054		7.87727	7.58602	7.98649	7.82333	7.71606	6.23876	5.92782	6.04154	5.87812	6.04525
10477353	Mapre1	microtubule-associated protein, RP/EB family, member 1	0	1.77	3.41054		11.7364	11.4966	11.5873	11.6548	11.621	10.0184	9.65167	9.66455	10.0506	9.87313
10408666	Rpp40	ribonuclease P 40 subunit (human)	0	1.77	3.41054		8.70205	8.60797	8.63631	8.73125	8.89237	7.25627	6.64217	6.86346	7.07863	6.89983
10363161	Tmem229b	transmembrane protein 229B	0	1.77	3.41054		8.73299	8.6878	8.61833	8.83009	8.84636	6.87152	6.63127	7.0876	7.31902	6.95322
10558948	Cd151	CD151 antigen	0	1.77	3.41054		11.7883	11.8187	11.7576	11.2903	11.4178	10.045	9.82682	9.87461	9.73472	9.73316
10501492			0	1.77	3.41054		8.75211	8.59557	8.57706	8.31892	8.19313	6.93027	6.79726	6.71419	6.5211	6.64231
10503212	Chd7	chromodomain helicase DNA binding protein 7	0	1.77	3.41054		8.29007	8.08547	8.07796	9.24433	9.19289	6.75885	6.47861	6.5104	7.48392	6.82251
10368782	Fig4	FIG4 homolog (S. cerevisiae)	0	1.76	3.38698		11.1213	11.146	11.2345	11.0643	11.1446	9.3741	9.37433	9.36404	9.39801	9.38448
10534456	Hip1	huntingtin interacting protein 1	0	1.76	3.38698		9.59826	9.5935	9.61039	9.53952	9.63927	7.89127	7.74045	7.73357	7.87241	7.91935
10437541	Nagpa	N-acetylglucosamine-1-phosphodiester alpha-N-acetylglucosaminidase	0	1.76	3.38698		9.15349	9.18235	9.09384	9.05125	9.23486	7.3363	7.29462	7.36238	7.39129	7.517
10585842	Nptn	neuroplastin	0	1.76	3.38698		11.2921	11.2403	11.1518	11.0904	11.0025	9.5785	9.42865	9.30212	9.42859	9.26368
10566034	Folr1	folate receptor 1 (adult)	0	1.76	3.38698		8.90156	8.9272	8.87904	8.73364	8.66281	7.16491	6.99215	7.23472	6.94707	6.95263
10341944			0	1.76	3.38698		11.5686	11.4692	11.4616	11.1501	11.4212	9.77082	9.75042	9.50122	9.5934	9.65445
10596053	Pccb	propionyl Coenzyme A carboxylase, beta polypeptide	0	1.76	3.38698		9.97084	9.9167	9.9979	9.52985	9.78777	8.11997	8.04015	8.04381	8.08528	8.13384
10358454	Rbm3	RNA binding motif protein 3	0	1.76	3.38698		11.8612	11.6919	11.8192	11.9027	11.975	10.1687	9.83538	9.98335	10.2629	10.1876
10375103	Fbxw11	F-box and WD-40 domain protein 11	0	1.76	3.38698		10.1384	9.95142	10.0503	9.67012	9.80409	8.28292	8.10961	8.22137	8.0913	8.09054
10362115	1110021L09Rik	RIKEN cDNA 1110021L09 gene	0	1.76	3.38698		8.08822	8.13672	8.12447	8.16881	8.20852	6.26941	6.08183	6.55884	6.57879	6.43914
10403842	Elmo1	engulfment and cell motility 1, ced-12 homolog (C. elegans)	0	1.76	3.38698		10.4559	10.2615	10.3023	10.5473	10.5699	8.78107	8.53746	8.42036	8.84628	8.75242
10571344	D8Ertd82e	DNA segment, Chr 8, ERATO Doi 82, expressed	0	1.76	3.38698		8.23434	7.95923	8.33222	8.26284	8.06262	6.61658	6.24122	6.55446	6.38367	6.2576
10599962	Mamld1	mastermind-like domain containing 1	0	1.76	3.38698		9.33831	8.8966	9.0557	9.14817	9.06362	7.47406	6.98736	7.36099	7.49183	7.36665
10512514	Tln1	talin 1	0	1.76	3.38698		9.70977	9.76505	9.77443	9.86524	9.97758	7.94424	7.79968	7.90946	8.31868	8.31569
10340116			0	1.76	3.38698		9.31041	8.93119	9.27428	9.52969	9.26678	7.63024	7.26751	7.403	7.69263	7.53271
10343760			0	1.76	3.38698		10.73	10.6805	10.5556	10.3784	10.1576	8.85145	8.83542	8.84047	8.44252	8.73886
10476197	Itpa	inosine triphosphatase (nucleoside triphosphate pyrophosphatase)	0	1.76	3.38698		11.0429	10.873	10.9538	11.1896	11.2443	9.16966	8.9957	9.18927	9.57662	9.59118
10367033	Zbtb39	zinc finger and BTB domain containing 39	0	1.76	3.38698		9.11266	9.04142	9.084	9.60094	9.45746	7.43755	7.24414	7.30107	7.80027	7.70515
10404731	Tmem14c	transmembrane protein 14C	0	1.76	3.38698		10.1874	9.98565	9.85512	9.55014	9.18551	8.16697	8.11389	7.89001	7.91255	7.90005
10544171	Slc37a3	solute carrier family 37 (glycerol-3-phosphate transporter), member 3	0	1.75	3.36359		9.8496	9.89452	9.85903	9.83889	9.85164	8.14005	8.0176	8.01245	8.22013	8.148
10345442	Hs6st1	heparan sulfate 6-O-sulfotransferase 1	0	1.75	3.36359		8.59545	8.58811	8.55769	8.4895	8.63696	6.84692	6.73494	6.90338	6.75835	6.89116
10473965	Arhgap1	Rho GTPase activating protein 1	0	1.75	3.36359		10.027	9.98694	10.0966	9.94474	10.0346	8.33157	8.17811	8.36908	8.2065	8.23009
10393559	Timp2	tissue inhibitor of metalloproteinase 2	0	1.75	3.36359		12.2852	12.2032	12.2537	12.3423	12.3023	10.6819	10.3848	10.4063	10.6626	10.4981
10606376	2610002M06Rik	RIKEN cDNA 2610002M06 gene	0	1.75	3.36359		8.63745	8.77402	8.57337	8.55174	8.59208	7.09218	6.76145	6.73282	6.8736	6.92249
10344493			0	1.75	3.36359		11.4155	11.2959	11.5007	11.1812	11.294	9.71142	9.55026	9.41331	9.58822	9.68764
10602454	Fam120c	family with sequence similarity 120, member C	0	1.75	3.36359		8.08929	7.80254	7.8776	7.76165	7.85183	6.09773	5.9531	6.12348	6.25365	6.21835
10579341	Mpv17l2	MPV17 mitochondrial membrane protein-like 2	0	1.75	3.36359		10.7402	10.8797	11.006	10.5685	10.87	8.97318	9.00891	9.12274	9.10736	9.1191
10341321			0	1.75	3.36359		11.6013	11.5046	11.3946	11.7912	11.8008	9.92996	9.7492	9.81396	9.92455	9.93602
10438738	Bcl6	B-cell leukemia/lymphoma 6	0	1.75	3.36359		8.32793	8.21773	7.89977	7.96817	7.95526	6.42998	6.22566	6.19623	6.35501	6.42077
10404783	Edn1	endothelin 1	0	1.75	3.36359		7.93537	7.64726	7.55844	7.92205	7.7164	6.18588	5.81519	6.08284	5.98102	5.97532
10566132	Rhog	ras homolog gene family, member G	0	1.75	3.36359		9.26019	9.20432	9.29472	8.87665	9.09426	7.55098	7.49098	7.39879	7.38876	7.12669
10578547	Helt	Hey-like transcription factor (zebrafish)	0	1.75	3.36359		7.09326	7.06066	7.1011	7.46922	7.51277	5.43123	5.56966	5.3675	5.54909	5.55488
10584334	Siae	sialic acid acetylesterase	0	1.75	3.36359		10.8296	10.8143	10.7842	10.3449	10.4661	9.05958	8.91843	8.82829	8.88932	8.79552
10363905	Zwint	ZW10 interactor	0	1.75	3.36359		11.3553	11.2746	11.2861	11.5854	11.6962	9.61542	9.48456	9.50663	9.86812	9.9651
10571444	Slc7a2	solute carrier family 7 (cationic amino acid transporter, y+ system), member 2	0	1.75	3.36359		9.51643	9.30909	9.08322	9.26183	8.92351	7.77928	7.40061	7.32942	7.61725	7.2302
10598236	Nudt11	nudix (nucleoside diphosphate linked moiety X)-type motif 11	0	1.75	3.36359		7.73855	7.61023	7.39537	7.13636	7.59678	5.6121	5.58006	6.16565	5.77737	5.59416
10435193	Lmln	leishmanolysin-like (metallopeptidase M8 family)	0	1.74	3.34035		10.1152	10.0762	10.112	9.96955	10.011	8.30328	8.30134	8.28122	8.37384	8.34072
10535174	Tmem184a	transmembrane protein 184a	0	1.74	3.34035		13.5101	13.5517	13.5377	13.5135	13.5213	11.8942	11.7211	11.7958	11.7106	11.8095
10364950	Gadd45b	growth arrest and DNA-damage-inducible 45 beta	0	1.74	3.34035		9.18793	9.28755	9.24098	9.1298	9.2373	7.56084	7.50139	7.54396	7.315	7.44964
10363415	Spock2	sparc/osteonectin, cwcv and kazal-like domains proteoglycan 2	0	1.74	3.34035		12.2425	12.3256	12.3719	12.2299	12.2989	10.6073	10.4366	10.5196	10.5173	10.7018
10576391	Rab4a	RAB4A, member RAS oncogene family	0	1.74	3.34035		9.79529	9.55333	9.63057	9.57179	9.51072	7.83331	7.86382	7.80342	8.04564	7.79977
10382502	Cdr2l	cerebellar degeneration-related protein 2-like	0	1.74	3.34035		8.57599	8.52527	8.4526	8.59489	8.70189	6.74031	6.67555	6.83819	6.86925	7.00452
10556113	Rbm3	RNA binding motif protein 3	0	1.74	3.34035		12.1112	11.9927	12.0641	12.1195	12.1513	10.4447	10.1164	10.2768	10.4738	10.4158
10509500	Hp1bp3	heterochromatin protein 1, binding protein 3	0	1.74	3.34035		10.8242	10.8963	10.8584	11.0576	11.0665	9.20044	9.0486	9.03582	9.37182	9.32144
10341083			0	1.74	3.34035		12.023	11.8232	11.9051	11.5721	11.6903	10.1354	10.1098	10.0297	9.9418	10.111
10562480	Nudt19	nudix (nucleoside diphosphate linked moiety X)-type motif 19	0	1.74	3.34035		8.98255	8.9301	8.69315	8.67397	8.6036	7.22623	6.97141	7.1471	6.90718	6.93031
10454655	Apc	adenomatosis polyposis coli	0	1.74	3.34035		9.85216	9.55214	9.51872	9.777	9.71987	8.0282	7.69337	7.81092	8.11233	8.06229
10520638	0610007C21Rik	RIKEN cDNA 0610007C21 gene	0	1.74	3.34035		11.5066	11.4912	11.4143	11.1105	11.0639	9.76937	9.42265	9.72064	9.46255	9.48736
10463551	Elovl3	elongation of very long chain fatty acids (FEN1/Elo2, SUR4/Elo3, yeast)-like 3	0	1.74	3.34035		7.23407	7.39677	6.62341	7.10752	6.92803	5.49718	5.29777	5.14252	5.24371	5.39108
10340956			0	1.74	3.34035		10.6315	10.4588	10.6891	11.169	11.0393	9.0757	8.72577	8.85623	9.4331	9.1886
10342484			0	1.74	3.34035		9.87606	9.57247	10.0157	10.661	10.2478	8.26574	8.09698	8.32034	8.5756	8.39966
10343866			0	1.74	3.34035		9.06162	9.52381	9.04324	9.0714	9.59483	7.36824	7.56795	6.82228	8.0335	7.78334
10594289	Glce	glucuronyl C5-epimerase	0	1.73	3.31728		9.36855	9.35261	9.37508	9.07947	9.41509	7.58576	7.60744	7.60774	7.55809	7.60651
10384504	Meis1	Meis homeobox 1	0	1.73	3.31728		8.80425	8.66825	8.62176	8.80063	8.702	7.12717	6.90685	6.97617	7.09066	6.84539
10432923	Spryd3	SPRY domain containing 3	0	1.73	3.31728		9.45977	9.37461	9.32029	9.52319	9.57609	7.5729	7.69052	7.68738	7.83619	7.80845
10478962	2010011I20Rik	RIKEN cDNA 2010011I20 gene	0	1.73	3.31728		9.52344	9.47268	9.43418	9.4235	9.3469	7.82621	7.54325	7.61829	7.87417	7.67241
10525111	Ddx54	DEAD (Asp-Glu-Ala-Asp) box polypeptide 54	0	1.73	3.31728		10.5417	10.5522	10.5193	10.6693	10.782	8.88414	8.74156	8.73689	9.06856	9.0033
10530310	Bend4	BEN domain containing 4	0	1.73	3.31728		9.35199	9.20477	9.27196	9.30103	9.40097	7.80131	7.64763	7.55562	7.58507	7.29728
10449955	Cyp4f13	cytochrome P450, family 4, subfamily f, polypeptide 13	0	1.73	3.31728		8.83438	8.88918	8.76326	8.58219	8.48611	7.17146	6.91208	6.98773	6.96056	6.89574
10404612	Rreb1	ras responsive element binding protein 1	0	1.73	3.31728		8.82385	8.63217	8.6558	8.88266	8.94163	7.13432	6.94875	6.83504	7.3137	7.06885
10456699	Acaa2	acetyl-Coenzyme A acyltransferase 2 (mitochondrial 3-oxoacyl-Coenzyme A thiolase)	0	1.73	3.31728		10.7219	10.5997	10.6563	10.8295	10.8465	9.10311	8.67906	8.94826	9.03907	9.23555
10544383	Kel	Kell blood group	0	1.73	3.31728		6.68158	6.96403	6.89443	6.86456	6.68494	5.21557	5.21805	4.98439	5.23623	4.77698
10338475			0	1.73	3.31728		10.0059	9.96377	9.91538	9.93675	10.1682	8.38238	8.28394	7.85188	8.28816	8.55818
10492078	Alg5	asparagine-linked glycosylation 5 homolog (yeast, dolichyl-phosphate beta-glucosyltransferase)	0	1.73	3.31728		9.28909	9.13959	9.23351	8.6363	8.76572	7.43388	7.19713	7.43028	7.19156	7.16528
10482139	Pdcl	phosducin-like	0	1.73	3.31728		10.2718	10.3981	10.2751	9.726	9.67269	8.62614	8.44233	8.40349	8.09992	8.14217
10503188	Chd7	chromodomain helicase DNA binding protein 7	0	1.73	3.31728		8.52642	8.21222	8.27403	8.92571	8.92169	6.61092	6.59984	6.83854	7.25254	6.8931
10344028			0	1.73	3.31728		9.69853	9.16304	9.24953	9.90294	9.48722	8.14236	7.58378	7.52795	8.40727	7.17333
10342461			0.001	1.73	3.31728		9.30001	9.27178	9.31937	10.4672	10.4948	7.74917	7.49808	7.55351	8.87279	8.52221
10405495	B4galt7	xylosylprotein beta1,4-galactosyltransferase, polypeptide 7 (galactosyltransferase I)	0	1.72	3.29436		9.36421	9.38152	9.3267	9.26915	9.2636	7.66001	7.56047	7.54373	7.63409	7.61055
10462217	Dmrt1	doublesex and mab-3 related transcription factor 1	0	1.72	3.29436		10.3231	10.2418	10.2372	10.2335	10.1493	8.48037	8.43597	8.5007	8.52284	8.65273
10342860			0	1.72	3.29436		11.7556	11.5993	11.6254	11.6426	11.7703	10.0343	9.82808	9.94778	10.0009	9.97853
10422059	Kctd12	potassium channel tetramerisation domain containing 12	0	1.72	3.29436		9.94292	9.94961	10.0579	9.76766	9.88004	8.26161	8.25583	8.07152	8.10786	8.29556
10505008	Slc44a1	solute carrier family 44, member 1	0	1.72	3.29436		9.34572	9.26155	9.27934	9.23247	9.14051	7.74715	7.36162	7.48834	7.6247	7.45549
10384223	Igfbp3	insulin-like growth factor binding protein 3	0	1.72	3.29436		8.60988	8.25402	8.26898	8.2332	8.42468	6.68754	6.62928	6.54556	6.63868	6.68529
10339812			0	1.72	3.29436		10.5734	10.5955	10.5884	10.5088	10.6384	8.95008	8.71193	8.69488	9.15089	8.8084
10381588	Grn	granulin	0	1.72	3.29436		11.0375	11.1059	11.1363	10.8769	10.8493	9.45581	9.06364	9.2336	9.43436	9.24014
10591522	Ap1m2	adaptor protein complex AP-1, mu 2 subunit	0	1.72	3.29436		8.24686	8.41493	8.19371	8.66536	8.37112	6.60131	6.63891	6.54013	6.86419	6.63596
10340212			0	1.72	3.29436		12.0869	11.9068	12.0073	11.6193	11.7496	10.257	9.95777	10.0535	10.2114	10.3032
10413008	Fut11	fucosyltransferase 11	0	1.72	3.29436		9.34421	9.09847	9.20569	8.81473	8.96736	7.50531	7.1725	7.30053	7.50035	7.33926
10508992	Paqr7	progestin and adipoQ receptor family member VII	0	1.72	3.29436		10.3451	10.344	10.2767	9.91815	9.99893	8.67576	8.52271	8.6493	8.23961	8.17141
10543273	Cttnbp2	cortactin binding protein 2	0	1.72	3.29436		8.2408	7.94523	7.91113	8.36467	7.93139	6.50222	6.0206	6.09589	6.58132	6.61731
10574384	Ndrg4	N-myc downstream regulated gene 4	0	1.72	3.29436		9.39933	9.01634	8.81949	9.66043	9.18818	7.5789	7.41658	7.30177	7.66176	7.52273
10437552	AU021092	expressed sequence AU021092	0	1.72	3.29436		9.96603	10.2019	10.09	9.83941	10.1623	8.81265	7.99905	8.01118	8.34183	8.50496
10385081	Anp32-ps	acidic (leucine-rich) nuclear phosphoprotein 32 family, pseudogene	0	1.72	3.29436		7.60701	7.09622	7.13854	8.0829	7.76662	6.1449	5.51688	5.71976	5.94109	5.79078
10357870	Prelp	proline arginine-rich end leucine-rich repeat	0	1.72	3.29436		9.21268	10.182	9.87107	8.98993	9.43129	7.60642	8.08978	7.74238	7.85993	7.80807
10592816	Hmbs	hydroxymethylbilane synthase	0	1.71	3.27161		10.2033	10.1275	10.1213	10.2761	10.1403	8.57053	8.32352	8.50453	8.49453	8.42494
10342675			0	1.71	3.27161		12.4788	12.5464	12.6477	12.672	12.6911	10.9125	10.9417	10.7671	10.8449	11.0213
10342502			0	1.71	3.27161		10.915	10.7554	10.8991	10.8899	10.9576	9.27082	9.16979	9.03458	9.08256	9.29549
10596442	Ppm1m	protein phosphatase 1M	0	1.71	3.27161		11.1229	10.9217	11.0288	10.8722	10.8393	9.17147	9.27894	9.26297	9.15107	9.35686
10476326	Cds2	CDP-diacylglycerol synthase (phosphatidate cytidylyltransferase) 2	0	1.71	3.27161		10.2781	10.322	10.3701	10.0757	10.2122	8.59563	8.5584	8.58654	8.38311	8.59664
10438017	Fgd4	FYVE, RhoGEF and PH domain containing 4	0	1.71	3.27161		7.97635	8.02418	8.11844	8.00337	8.13133	6.56285	6.29212	6.3096	6.28989	6.23013
10546538	Suclg2	succinate-Coenzyme A ligase, GDP-forming, beta subunit	0	1.71	3.27161		10.1389	10.2016	10.197	10.0369	10.1816	8.48167	8.26374	8.36423	8.60897	8.49937
10607774	Mospd2	motile sperm domain containing 2	0	1.71	3.27161		7.76151	7.72448	7.77601	7.75535	7.92741	6.1951	5.8831	6.02791	6.2472	6.01681
10601844	Bhlhb9	basic helix-loop-helix domain containing, class B9	0	1.71	3.27161		8.40061	8.18194	8.30419	8.37943	8.53698	6.72818	6.42761	6.62247	6.70556	6.75709
10566993	Galntl4	UDP-N-acetyl-alpha-D-galactosamine:polypeptide N-acetylgalactosaminyltransferase-like 4	0	1.71	3.27161		8.25725	8.31716	8.05445	8.27008	8.15469	6.42655	6.2651	6.63958	6.56322	6.62535
10372488	Tmem19	transmembrane protein 19	0	1.71	3.27161		9.6585	9.62628	9.69109	9.37384	9.35189	7.89242	7.74448	7.93292	7.87019	7.68884
10420823	Hmbox1	homeobox containing 1	0	1.71	3.27161		9.64482	9.45909	9.6008	9.82633	9.77177	7.73576	7.85318	7.98231	8.12505	8.04818
10428918	Fam84b	family with sequence similarity 84, member B	0	1.71	3.27161		8.28894	8.71639	8.47768	8.07553	8.17224	6.68726	6.71509	6.75736	6.50093	6.49753
10360858	C130074G19Rik	RIKEN cDNA C130074G19 gene	0	1.71	3.27161		9.17826	8.8161	8.78671	9.15663	9.41344	7.3782	7.2751	7.23006	7.64313	7.29946
10575616	Gabarapl2	gamma-aminobutyric acid (GABA) A receptor-associated protein-like 2	0	1.71	3.27161		7.76412	7.56042	7.27489	7.52988	7.85239	5.99728	5.66803	5.70234	6.24255	5.82766
10551852	Clip3	CAP-GLY domain containing linker protein 3	0	1.71	3.27161		8.98444	8.53743	8.80657	9.34152	8.90171	7.09686	7.02283	7.03804	7.52856	7.35975
10341574			0	1.71	3.27161		10.6654	10.3527	10.4188	9.99114	10.1247	8.9408	8.61486	8.76988	8.41941	8.24502
10409265	Auh	AU RNA binding protein/enoyl-coenzyme A hydratase	0	1.71	3.27161		9.71724	9.26349	9.32257	9.02198	8.85201	7.998	7.3603	7.58022	7.66736	7.0459
10558903	Taldo1	transaldolase 1	0	1.71	3.27161		8.24877	8.30384	8.14951	8.7861	8.92307	6.61933	6.33316	6.61329	7.27973	7.02355
10440993	Rcan1	regulator of calcineurin 1	0	1.7	3.24901		10.4956	10.485	10.482	10.4645	10.506	8.88895	8.78306	8.71704	8.76598	8.80179
10401519	Npc2	Niemann Pick type C2	0	1.7	3.24901		10.5012	10.5495	10.386	10.4495	10.433	8.80731	8.76608	8.72673	8.75387	8.75352
10467842	Got1	glutamate oxaloacetate transaminase 1, soluble	0	1.7	3.24901		10.242	10.1919	10.308	10.1196	10.2806	8.51434	8.56746	8.54372	8.51117	8.49824
10392701	Slc39a11	solute carrier family 39 (metal ion transporter), member 11	0	1.7	3.24901		9.90973	9.89877	9.74648	9.6544	9.82263	8.12252	8.06664	8.10947	8.15458	8.07536
10604637	Cxx1b	CAAX box 1 homolog B (human)	0	1.7	3.24901		9.2429	9.29464	9.28579	9.33996	9.21564	7.44383	7.57176	7.54204	7.5664	7.76094
10465895	Fads2	fatty acid desaturase 2	0	1.7	3.24901		12.6597	12.5597	12.5534	12.5447	12.5716	11.0114	10.6952	10.8773	10.9504	10.8594
10547513	Cecr5	cat eye syndrome chromosome region, candidate 5 homolog (human)	0	1.7	3.24901		10.82	10.8129	10.8059	10.6744	10.7382	8.98284	8.94615	9.03485	9.12959	9.26144
10572647	Slc27a1	solute carrier family 27 (fatty acid transporter), member 1	0	1.7	3.24901		10.7574	11.0034	10.9674	10.6627	10.812	9.23263	9.08382	9.06359	9.13011	9.16847
10576971	Irs2	insulin receptor substrate 2	0	1.7	3.24901		8.29021	7.9878	8.07347	8.29962	8.24127	6.38922	6.4752	6.35769	6.53029	6.62392
10587616	Prss35	protease, serine, 35	0	1.7	3.24901		9.48566	9.73035	9.74262	9.57563	9.55077	8.02179	7.70526	7.86303	8.06878	7.93378
10503174	Chd7	chromodomain helicase DNA binding protein 7	0	1.7	3.24901		9.82726	9.57519	9.57627	9.84408	9.8658	8.13995	7.94424	7.94947	8.17998	7.95378
10544148	Jhdm1d	jumonji C domain-containing histone demethylase 1 homolog D (S. cerevisiae)	0	1.7	3.24901		11.2447	11.2384	11.2243	11.0877	11.243	9.54273	9.34963	9.29156	9.68547	9.65396
10582664	2310022B05Rik	RIKEN cDNA 2310022B05 gene	0	1.7	3.24901		9.63399	9.81841	9.85447	9.95333	10.1223	8.06465	8.18695	8.24011	8.12069	8.28772
10355152	Fzd5	frizzled homolog 5 (Drosophila)	0	1.7	3.24901		8.22226	8.30678	8.46758	8.17475	8.21537	6.72161	6.55518	6.83528	6.39996	6.36849
10463981			0	1.7	3.24901		7.86356	8.12074	7.86921	8.03465	8.14797	5.9749	6.40368	6.2544	6.34255	6.55389
10341526			0	1.7	3.24901		10.3264	9.87047	9.83164	10.277	10.3094	8.48483	8.05631	8.38521	8.18055	8.99612
10606835	Bex2	brain expressed X-linked 2	0	1.7	3.24901		7.0972	6.83238	6.90904	7.45619	7.86564	5.65513	5.33152	5.4235	5.55772	5.70053
10557399	Sbk1	SH3-binding kinase 1	0	1.69	3.22657		9.35555	9.28127	9.35259	9.20684	9.2808	7.65334	7.62392	7.58271	7.57368	7.57518
10576305	Tcf25	transcription factor 25 (basic helix-loop-helix)	0	1.69	3.22657		11.202	11.1208	11.1558	11.1373	11.1638	9.5727	9.4226	9.45946	9.40901	9.48592
10373036	Os9	amplified in osteosarcoma	0	1.69	3.22657		11.1372	11.1751	11.0844	11.1563	11.1999	9.4124	9.34887	9.476	9.59323	9.49454
10576911	Efnb2	ephrin B2	0	1.69	3.22657		8.60654	8.47914	8.49751	8.63152	8.45097	6.85972	6.86849	6.79768	6.92436	6.75993
10399605	Adam17	a disintegrin and metallopeptidase domain 17	0	1.69	3.22657		10.6006	10.6572	10.6304	10.6524	10.6242	9.03065	8.78915	8.874	9.02166	9.021
10457780	Fam59a	family with sequence similarity 59, member A	0	1.69	3.22657		9.20453	9.08519	9.22723	9.28752	9.26429	7.45456	7.53913	7.43326	7.59946	7.60745
10342261			0	1.69	3.22657		13.5513	13.451	13.4268	13.4619	13.4929	11.9181	11.6754	11.6896	11.8128	11.8376
10340971			0	1.69	3.22657		10.2212	10.2027	10.301	10.0846	10.2812	8.56268	8.6078	8.586	8.47804	8.38636
10407173	Il6st	interleukin 6 signal transducer	0	1.69	3.22657		10.4564	10.4759	10.436	10.4195	10.3532	8.73817	8.61715	8.65413	8.90881	8.79661
10433389	Alg1	asparagine-linked glycosylation 1 homolog (yeast, beta-1,4-mannosyltransferase)	0	1.69	3.22657		9.96602	9.98772	10.0252	9.90114	10.0484	8.31148	8.14264	8.30693	8.26636	8.45969
10343212			0	1.69	3.22657		12.2162	12.0664	12.2759	12.0968	12.2043	10.6768	10.4076	10.408	10.4773	10.4501
10342949			0	1.69	3.22657		10.9951	10.8922	10.8779	10.8147	10.6273	9.23002	9.12829	9.23747	9.12661	9.03235
10344610			0	1.69	3.22657		12.4455	12.3415	12.2746	12.2084	12.2229	10.8372	10.4812	10.6201	10.5488	10.5363
10470248	Gpsm1	G-protein signalling modulator 1 (AGS3-like, C. elegans)	0	1.69	3.22657		9.87684	9.68424	9.73767	9.68459	9.82064	7.90058	7.96373	8.23189	8.04991	8.21159
10569319	Ctsd	cathepsin D	0	1.69	3.22657		11.9611	11.9413	11.94	11.7474	11.7916	10.3194	9.97583	10.1234	10.2845	10.2432
10505587	Kdm4c	lysine (K)-specific demethylase 4C	0	1.69	3.22657		9.41766	9.21613	9.30733	9.06799	9.18589	7.59142	7.40593	7.45538	7.66502	7.63451
10494227	Lass2	LAG1 homolog, ceramide synthase 2	0	1.69	3.22657		10.9666	11.0222	11.0002	10.7664	10.8841	9.42227	9.04144	9.17321	9.25515	9.29097
10458478	Fchsd1	FCH and double SH3 domains 1	0	1.69	3.22657		8.50369	8.53164	8.45989	8.74601	8.51664	6.86959	6.97398	6.62796	6.84475	6.98415
10603469	Rbm3	RNA binding motif protein 3	0	1.69	3.22657		11.5744	11.3836	11.4955	11.5916	11.6342	9.93258	9.58192	9.74718	10.0255	9.95952
10599207	Slc25a43	solute carrier family 25, member 43	0	1.69	3.22657		9.10917	9.05877	9.03681	8.76099	8.71431	7.34396	7.4023	7.25463	7.08144	7.12739
10562368	4931406P16Rik	RIKEN cDNA 4931406P16 gene	0	1.69	3.22657		10.938	10.7284	10.7664	10.9481	10.9379	9.12037	8.94054	9.04645	9.2815	9.47972
10367154	Gls2	glutaminase 2 (liver, mitochondrial)	0	1.69	3.22657		8.13319	8.19843	8.08602	8.37975	8.40047	6.27921	6.47045	6.56177	6.66708	6.79155
10340428			0	1.69	3.22657		10.4364	10.0492	10.1391	9.8655	10.0283	8.54671	8.45635	8.25971	8.30403	8.51009
10399421	Mycn	v-myc myelocytomatosis viral related oncogene, neuroblastoma derived (avian)	0	1.69	3.22657		8.42955	8.81668	8.7162	8.59729	8.71977	6.76378	6.76159	7.04503	7.05211	7.22525
10381416	Rnd2	Rho family GTPase 2	0	1.69	3.22657		10.1673	10.1705	10.2149	9.81461	9.69942	8.46857	8.33608	8.28553	8.26323	8.2665
10576692	Insr	insulin receptor	0	1.69	3.22657		9.72126	9.38482	9.5436	9.69586	9.39667	8.05295	7.67513	7.5884	8.05075	7.94348
10389293	Mrm1	mitochondrial rRNA methyltransferase 1 homolog (S. cerevisiae)	0	1.69	3.22657		8.79925	8.89658	8.94027	8.60023	8.49652	7.19161	6.64516	7.26755	7.07393	7.11873
10503182	Chd7	chromodomain helicase DNA binding protein 7	0	1.69	3.22657		8.6121	8.33462	8.44105	8.84194	8.8113	6.97576	6.668	6.74929	7.35976	6.85338
10405158	Pus7	pseudouridylate synthase 7 homolog (S. cerevisiae)	0	1.69	3.22657		7.67548	7.72205	7.62161	7.79806	8.0451	6.4377	5.66198	5.91089	6.02742	6.3504
10365749	Lta4h	leukotriene A4 hydrolase	0	1.68	3.20428		9.62911	9.50204	9.48329	9.59634	9.614	7.91791	7.86699	7.82315	7.86267	7.9337
10585048	Cadm1	cell adhesion molecule 1	0	1.68	3.20428		11.2796	11.1299	11.291	11.2354	11.2649	9.63285	9.53234	9.43159	9.59251	9.61386
10585099	Usp28	ubiquitin specific peptidase 28	0	1.68	3.20428		10.1795	10.0067	10.1272	9.93037	10.0265	8.50254	8.31489	8.25794	8.35113	8.44967
10366814	Cdk4	cyclin-dependent kinase 4	0	1.68	3.20428		11.8089	11.6519	11.7723	11.7007	11.6686	10.0248	9.91336	9.94204	10.1001	10.2187
10338585			0	1.68	3.20428		13.6515	13.5686	13.5257	13.5601	13.5626	11.9613	11.7155	11.8112	11.9499	12.0498
10339630			0	1.68	3.20428		11.3065	11.4685	11.3818	11.4149	11.5076	9.89866	9.62987	9.76396	9.59629	9.79517
10601235	Ogt	O-linked N-acetylglucosamine (GlcNAc) transferase (UDP-N-acetylglucosamine:polypeptide-N-acetylglucosaminyl transferase)	0	1.68	3.20428		10.7022	10.617	10.4981	10.4044	10.5226	8.97056	8.79059	8.7551	8.87546	8.97104
10405211	Gadd45g	growth arrest and DNA-damage-inducible 45 gamma	0	1.68	3.20428		9.27931	9.35252	9.35068	8.99057	9.13889	7.49635	7.38686	7.614	7.6779	7.55763
10575074	Tmco7	transmembrane and coiled-coil domains 7	0	1.68	3.20428		9.50236	9.34502	9.48948	9.07792	9.21093	7.76946	7.6141	7.60899	7.63476	7.57862
10515716	Szt2	seizure threshold 2	0	1.68	3.20428		8.45591	8.19971	8.45224	8.4828	8.43602	6.52974	6.64296	6.67167	6.88573	6.90458
10533026	Prkab1	protein kinase, AMP-activated, beta 1 non-catalytic subunit	0	1.68	3.20428		9.86599	9.9448	9.9141	9.50284	9.79595	8.28808	8.07068	8.0271	7.97824	8.2381
10445875	Btg3	B-cell translocation gene 3	0	1.68	3.20428		10.5625	10.2541	10.2961	10.4457	10.3935	8.81089	8.44613	8.57412	8.8613	8.85977
10342811			0	1.68	3.20428		10.0812	10.1003	10.2226	9.76739	9.79667	8.32557	8.25527	8.35867	8.48406	8.16852
10353775	Bend6	BEN domain containing 6	0	1.68	3.20428		8.17984	7.85723	7.67403	7.6747	7.63506	6.22851	6.05322	6.041	6.09876	6.20846
10506031	Nfia	nuclear factor I/A	0	1.68	3.20428		9.43236	9.37553	9.38753	9.60786	9.4989	7.67698	7.71873	7.49125	8.06945	7.9584
10492355	Mme	membrane metallo endopeptidase	0	1.68	3.20428		9.3495	9.29153	9.28182	9.22912	9.12581	7.93349	7.30709	7.41046	7.6257	7.62565
10385511	Psme2	proteasome (prosome, macropain) 28 subunit, beta	0	1.68	3.20428		7.85067	7.95914	7.89526	7.58334	7.51455	6.16164	5.97905	6.37411	5.89847	5.96957
10494655	Zfp697	zinc finger protein 697	0	1.68	3.20428		7.66911	7.58125	7.41425	7.57866	7.8422	6.23217	5.70534	5.70311	6.02379	6.02938
10343640			0	1.68	3.20428		11.427	11.3926	11.4241	10.9691	11.0511	9.70244	9.58584	9.78189	9.44491	9.34778
10572485	Rab3a	RAB3A, member RAS oncogene family	0	1.68	3.20428		7.76646	7.73853	7.85153	7.19492	7.42567	5.77319	5.90311	6.01069	5.9389	5.92706
10415662	Rcbtb1	regulator of chromosome condensation (RCC1) and BTB (POZ) domain containing protein 1	0	1.68	3.20428		10.1773	10.169	10.133	9.57611	9.70214	8.44579	8.26418	8.26194	8.12411	8.26888
10340545			0	1.68	3.20428		10.6898	10.4753	10.5529	10.955	10.9334	9.09483	8.84109	8.83032	9.02547	9.42487
10503200	Chd7	chromodomain helicase DNA binding protein 7	0	1.68	3.20428		7.89276	7.67036	7.63854	8.19108	8.49123	6.35132	6.02075	6.21317	6.47684	6.43782
10340852			0	1.68	3.20428		9.04681	8.30644	8.66623	9.14108	9.32718	6.92926	6.96825	6.92742	7.78005	7.48356
10418702	Sh3bp5	SH3-domain binding protein 5 (BTK-associated)	0	1.67	3.18215		10.8768	10.8198	10.8408	10.7918	10.805	9.14651	9.10151	9.17294	9.13743	9.24606
10526232	Wbscr27	Williams Beuren syndrome chromosome region 27 (human)	0	1.67	3.18215		8.81514	8.72379	8.82621	8.69024	8.71988	7.11768	7.11874	6.98233	7.02612	7.16217
10444068	Tapbp	TAP binding protein	0	1.67	3.18215		12.0076	12.0732	12.1041	12.0453	12.1701	10.2789	10.3771	10.4084	10.5042	10.4608
10600453	Ikbkg	inhibitor of kappaB kinase gamma	0	1.67	3.18215		8.13618	8.10603	7.9568	7.96644	7.91761	6.31316	6.3848	6.27745	6.38562	6.35021
10455784	Gramd3	GRAM domain containing 3	0	1.67	3.18215		10.5789	10.4122	10.3837	10.3153	10.387	8.71208	8.779	8.73418	8.81719	8.68063
10544525	Pdia4	protein disulfide isomerase associated 4	0	1.67	3.18215		11.6394	11.5996	11.6682	11.5394	11.6816	10.0654	9.80529	9.92351	10.0202	9.9676
10342171			0	1.67	3.18215		11.503	11.4247	11.4959	11.4844	11.6109	9.91322	9.76667	9.68718	9.78582	10.0109
10426479	Ano6	anoctamin 6	0	1.67	3.18215		9.25157	9.13194	9.36472	9.08024	9.19127	7.60384	7.52508	7.66922	7.4631	7.39201
10400254	Heatr5a	HEAT repeat containing 5A	0	1.67	3.18215		10.5972	10.5669	10.5173	10.3546	10.5346	8.87505	8.92366	8.83559	8.62997	8.9694
10345675	Npas2	neuronal PAS domain protein 2	0	1.67	3.18215		7.64235	7.40065	7.5232	7.60775	7.29624	5.76784	5.89213	5.6604	5.8596	5.95686
10601878	Tceal1	transcription elongation factor A (SII)-like 1	0	1.67	3.18215		8.59327	8.351	8.49563	8.63041	8.71241	7.06139	6.71125	6.81754	6.92644	6.89773
10535103	Micall2	MICAL-like 2	0	1.67	3.18215		8.48783	8.45684	8.21223	8.26798	8.14172	6.55225	6.62927	6.93027	6.6925	6.43653
10551836	Cox7a1	cytochrome c oxidase, subunit VIIa 1	0	1.67	3.18215		8.1511	8.33353	8.25877	8.41411	8.44768	6.4471	6.499	6.48414	6.84751	6.9545
10489528	Wfdc9	WAP four-disulfide core domain 9	0	1.67	3.18215		7.32824	7.36309	7.38359	6.84031	6.94373	5.68178	5.45121	5.61641	5.40543	5.37099
10344111			0	1.67	3.18215		10.5422	10.4406	10.6387	10.6158	10.6851	9.03101	9.0097	9.27245	8.64371	8.6066
10530615	Ociad2	OCIA domain containing 2	0	1.67	3.18215		8.74513	8.4004	8.21226	8.63571	8.50982	7.2279	6.76543	6.66629	6.86334	6.61485
10360070	Fcer1g	Fc receptor, IgE, high affinity I, gamma polypeptide	0	1.67	3.18215		9.35644	8.89013	8.63194	8.90435	8.46171	7.44326	7.07542	7.04826	7.30783	7.02645
10607950			0	1.67	3.18215		8.20597	7.9564	7.89117	8.23839	6.82524	6.42492	6.26356	6.15298	6.49861	5.41701
10342838			0.001	1.67	3.18215		7.59632	7.52419	7.4263	7.8758	7.68357	6.00514	6.64882	6.22129	6.26222	4.62088
10433311	Mgrn1	mahogunin, ring finger 1	0	1.66	3.16017		10.559	10.5903	10.528	10.58	10.628	8.94479	8.82591	8.82049	8.94607	9.02837
10582094	Mbtps1	membrane-bound transcription factor peptidase, site 1	0	1.66	3.16017		11.4101	11.2393	11.3462	11.1773	11.2541	9.67882	9.53437	9.59244	9.66009	9.66341
10541290	Pex26	peroxisomal biogenesis factor 26	0	1.66	3.16017		8.12417	8.05364	7.90358	8.0574	8.14543	6.36801	6.50427	6.32057	6.44232	6.336
10518570	Pgd	phosphogluconate dehydrogenase	0	1.66	3.16017		10.8191	10.8298	10.8461	10.7345	10.6358	9.17157	8.95326	9.19541	9.14778	9.08247
10368356	Akap7	A kinase (PRKA) anchor protein 7	0	1.66	3.16017		9.09166	9.23453	9.24311	9.05398	9.30832	7.39795	7.52851	7.63244	7.51973	7.56506
10454786	Ctnna1	catenin (cadherin associated protein), alpha 1	0	1.66	3.16017		10.3266	10.2367	10.2027	10.1632	10.4176	8.71979	8.42735	8.62305	8.63971	8.65697
10549162	St8sia1	ST8 alpha-N-acetyl-neuraminide alpha-2,8-sialyltransferase 1	0	1.66	3.16017		8.10264	8.27851	8.33468	8.08762	8.19001	6.48556	6.69317	6.58028	6.39193	6.51758
10453436	Mcfd2	multiple coagulation factor deficiency 2	0	1.66	3.16017		9.98951	10.1073	10.0387	9.79692	9.86025	8.31024	8.19826	8.26162	8.30379	8.4374
10339374			0	1.66	3.16017		10.8843	10.8724	10.9255	10.8637	11.0684	9.27952	9.16621	9.12828	9.23982	9.50346
10342632			0	1.66	3.16017		11.0295	10.8125	10.9087	10.5626	10.8004	9.18492	9.1502	9.13883	9.07252	9.27359
10343245			0	1.66	3.16017		10.1784	10.1737	10.1034	9.96912	9.96724	8.54534	8.4898	8.51537	8.14821	8.38718
10531215	Ankrd17	ankyrin repeat domain 17	0	1.66	3.16017		11.1588	11.0241	11.039	11.1966	11.203	9.42449	9.3623	9.23974	9.64549	9.64447
10576056	Map1lc3b	microtubule-associated protein 1 light chain 3 beta	0	1.66	3.16017		11.5697	11.5297	11.5068	11.7376	11.7434	9.91368	9.80408	9.80569	10.1545	10.1071
10343856			0	1.66	3.16017		11.7544	11.5665	11.5445	11.6443	11.6543	10.1807	9.97441	10.1032	9.68762	9.93759
10440419	Btg3	B-cell translocation gene 3	0	1.66	3.16017		10.5335	10.2372	10.2806	10.4083	10.3686	8.80393	8.44373	8.57947	8.85705	8.8428
10420023	Fam158a	family with sequence similarity 158, member A	0	1.66	3.16017		8.13882	8.41026	8.1081	7.9932	7.92355	6.62406	6.15753	6.41837	6.56349	6.52552
10548761	Hebp1	heme binding protein 1	0	1.66	3.16017		7.44756	7.72538	7.55364	7.65674	8.00488	5.91963	5.99539	6.21919	5.81358	6.1596
10435789			0	1.66	3.16017		8.85558	8.42914	8.68582	8.64914	8.43385	7.08786	6.82107	6.65698	7.18582	6.98028
10404996	Ninj1	ninjurin 1	0	1.66	3.16017		9.56918	9.55527	9.43598	9.01701	9.02139	7.6544	7.73954	7.77677	7.567	7.56017
10493692	Rab13	RAB13, member RAS oncogene family	0	1.66	3.16017		8.97163	8.87641	8.64013	9.09985	9.20366	7.42966	7.03793	7.15915	7.23763	7.60969
10343746			0	1.66	3.16017		10.7488	10.7809	10.8682	10.1122	10.3636	9.00922	8.95731	9.04888	8.73392	8.8474
10503214	Chd7	chromodomain helicase DNA binding protein 7	0	1.66	3.16017		8.32127	8.29579	8.18541	8.81357	8.92803	6.75306	6.86078	6.52902	7.09713	7.01876
10527423	Trrap	transformation/transcription domain-associated protein	0	1.66	3.16017		10.8632	10.5106	10.6303	9.96139	10.097	8.96432	8.89033	8.907	8.57084	8.41056
10562657	Gm5595	predicted gene 5595	0	1.66	3.16017		6.86096	7.08399	7.17177	7.24927	7.40272	5.49714	4.85705	5.72108	5.99655	5.38718
10457250	Arhgap12	Rho GTPase activating protein 12	0	1.65	3.13834		10.5834	10.6191	10.6149	10.5045	10.6282	9.00644	8.8421	8.85502	9.03642	8.96725
10577808	Tacc1	transforming, acidic coiled-coil containing protein 1	0	1.65	3.13834		11.9963	11.8821	11.9295	11.7889	11.7906	10.3184	10.2046	10.2245	10.2211	10.1748
10371141	Hmg20b	high mobility group 20 B	0	1.65	3.13834		9.21992	9.06499	9.29003	9.19984	9.18745	7.50625	7.58669	7.56103	7.38743	7.66286
10396205	Arid4a	AT rich interactive domain 4A (RBP1-like)	0	1.65	3.13834		9.72702	9.80139	9.77683	9.81124	9.73809	8.29831	8.01558	8.0292	8.21015	8.04685
10601819	Gprasp1	G protein-coupled receptor associated sorting protein 1	0	1.65	3.13834		8.57208	8.65637	8.45527	8.56137	8.61199	6.88587	6.90702	7.02791	7.02007	6.7437
10397882	Chga	chromogranin A	0	1.65	3.13834		9.73129	9.84931	9.62656	9.82034	10.007	8.16135	8.14377	8.10878	8.20688	8.16972
10553092	Dbp	D site albumin promoter binding protein	0	1.65	3.13834		9.77241	9.87961	9.79787	9.61486	9.58981	8.02785	8.01222	8.16258	7.98976	8.23576
10511739	Cpne3	copine III	0	1.65	3.13834		8.99135	9.26669	9.22525	8.97709	9.13642	7.49458	7.35731	7.34339	7.5555	7.57154
10545780	Exoc6b	exocyst complex component 6B	0	1.65	3.13834		10.528	10.5875	10.528	10.2074	10.2806	8.82236	8.68156	8.72851	8.71295	8.91176
10380721	Scrn2	secernin 2	0	1.65	3.13834		8.51211	8.619	8.3368	8.78536	8.61716	6.80653	6.80334	6.97812	6.98791	7.05057
10518108	Tmem51	transmembrane protein 51	0	1.65	3.13834		7.20715	7.42123	7.29348	7.01395	7.39042	5.63247	5.52758	5.43197	5.83309	5.64799
10499168	Kirrel	kin of IRRE like (Drosophila)	0	1.65	3.13834		8.22377	7.99441	8.20694	8.11972	7.95199	6.48738	6.24141	6.31018	6.73684	6.48098
10343787			0	1.65	3.13834		11.4971	11.4532	11.4204	11.3558	11.2843	10.0296	9.61995	9.94883	9.68237	9.50174
10475247	Tmem62	transmembrane protein 62	0	1.65	3.13834		7.98298	8.41939	8.44629	7.96674	8.39784	6.61828	6.55901	6.58244	6.63403	6.54969
10375216	Pank3	pantothenate kinase 3	0	1.65	3.13834		10.627	10.3937	10.383	10.623	10.7111	8.97993	8.6799	8.70693	9.15686	8.95479
10557498	Fam57b	family with sequence similarity 57, member B	0	1.65	3.13834		8.70912	8.36692	8.34866	8.51248	8.5699	6.65667	6.63287	6.90099	6.95681	7.10759
10418198	D14Ertd449e	DNA segment, Chr 14, ERATO Doi 449, expressed	0	1.65	3.13834		9.47004	9.59695	9.61384	9.05032	9.20794	7.88259	7.76612	7.77852	7.66191	7.60002
10467859	Cox15	COX15 homolog, cytochrome c oxidase assembly protein (yeast)	0	1.65	3.13834		9.66769	9.66144	9.83641	9.27598	9.38542	8.15556	7.80957	7.96762	7.80216	7.82405
10498837	Etfdh	electron transferring flavoprotein, dehydrogenase	0	1.65	3.13834		11.1113	11.0359	11.0512	10.6101	10.6276	9.42023	9.28814	9.40715	9.06755	9.00578
10338830			0	1.65	3.13834		11.3465	10.9858	11.1595	10.7982	10.9227	9.62752	9.37537	9.58666	9.31272	9.04254
10457020			0	1.65	3.13834		10.715	10.4201	10.4846	10.294	10.1954	9.06257	8.45244	8.8994	8.9195	8.52451
10344707	Pcmtd1	protein-L-isoaspartate (D-aspartate) O-methyltransferase domain containing 1	0	1.65	3.13834		8.40387	8.74471	8.49928	7.96674	8.20598	6.99134	6.74427	6.58547	6.49435	6.73699
10436830	Ifnar2	interferon (alpha and beta) receptor 2	0	1.65	3.13834		9.12496	8.94954	8.88738	8.69904	8.59434	7.54387	6.93982	7.27743	7.40762	6.82844
10391146	Acly	ATP citrate lyase	0	1.64	3.11666		10.904	11.0345	11.0122	10.8542	11.0387	9.3428	9.2432	9.30798	9.38386	9.38724
10459481	Lman1	lectin, mannose-binding, 1	0	1.64	3.11666		10.5156	10.5661	10.6166	10.5145	10.5637	8.97441	8.75075	8.89808	8.97838	8.98254
10457475	Abhd3	abhydrolase domain containing 3	0	1.64	3.11666		10.1494	10.1992	10.2395	10.1932	10.1888	8.54671	8.40683	8.46458	8.62351	8.72415
10372177	Tmtc2	transmembrane and tetratricopeptide repeat containing 2	0	1.64	3.11666		9.16192	9.02307	8.92796	9.26722	9.13584	7.53014	7.37364	7.4292	7.46281	7.51403
10390685	Ormdl3	ORM1-like 3 (S. cerevisiae)	0	1.64	3.11666		10.096	9.7766	10.092	10.0348	10.0396	8.43654	8.37273	8.35223	8.21561	8.46702
10529895	Qdpr	quinoid dihydropteridine reductase	0	1.64	3.11666		10.8364	10.733	10.7816	10.509	10.6562	9.15056	8.8945	9.1334	9.031	9.10731
10399379	Pgk1	phosphoglycerate kinase 1	0	1.64	3.11666		10.1703	10.0331	10.1402	10.3099	10.2429	8.57225	8.33698	8.53847	8.71612	8.52321
10498313	Pgk1	phosphoglycerate kinase 1	0	1.64	3.11666		10.1703	10.0331	10.1402	10.3099	10.2429	8.57225	8.33698	8.53847	8.71612	8.52321
10542395			0	1.64	3.11666		9.51299	9.35258	9.21864	9.24361	9.17771	7.66604	7.5494	7.55748	7.66079	7.85016
10532937	Unc119b	unc-119 homolog B (C. elegans)	0	1.64	3.11666		10.4996	10.57	10.545	10.1868	10.3005	8.90152	8.74958	8.86758	8.7297	8.63986
10459496	Ccbe1	collagen and calcium binding EGF domains 1	0	1.64	3.11666		9.22327	8.98841	8.99326	9.41278	9.23883	7.61122	7.49461	7.32476	7.59867	7.6416
10340379			0	1.64	3.11666		11.3773	11.1402	11.0723	10.8593	10.9149	9.4554	9.39502	9.34593	9.35986	9.60631
10415980	Fbxo16	F-box protein 16	0	1.64	3.11666		7.62493	7.60358	7.6858	8.03907	7.75546	6.08157	6.21552	6.03155	5.89009	6.27346
10397736	Kcnk13	potassium channel, subfamily K, member 13	0	1.64	3.11666		7.88604	8.06256	7.68651	8.28345	8.19212	6.40685	6.34792	6.31427	6.48217	6.35445
10548163	Tulp3	tubby-like protein 3	0	1.64	3.11666		8.40339	8.40585	8.44352	8.64988	8.90436	6.81711	6.92225	6.5889	7.01095	7.24985
10344016			0	1.64	3.11666		8.10269	8.01867	8.17089	8.12007	7.72677	6.55042	5.98879	6.1511	6.7664	6.47882
10374464	Spred2	sprouty-related, EVH1 domain containing 2	0	1.64	3.11666		8.42432	8.28114	8.35496	8.60343	8.71301	6.46724	6.67111	6.67737	7.25112	7.11776
10563050	Prr12	proline rich 12	0	1.64	3.11666		7.99991	8.03451	8.15083	8.66453	8.74483	6.55338	6.61545	6.55124	6.79709	6.88485
10588037	Rbp1	retinol binding protein 1, cellular	0	1.64	3.11666		11.1529	11.1376	10.7736	10.3963	9.99542	9.30002	9.13258	9.03069	9.03472	8.77186
10549361	Tm7sf3	transmembrane 7 superfamily member 3	0	1.63	3.09513		10.1031	10.0367	10.0874	10.1056	10.0782	8.50851	8.4633	8.41671	8.45935	8.4213
10345913	Nck2	non-catalytic region of tyrosine kinase adaptor protein 2	0	1.63	3.09513		10.2557	10.1471	10.1297	9.99715	10.1235	8.50648	8.55628	8.55959	8.36594	8.52922
10432398	Tuba1b	tubulin, alpha 1B	0	1.63	3.09513		13.1217	13.1166	13.1179	12.9573	13.0138	11.5685	11.4317	11.5179	11.3585	11.3162
10401028	Sgpp1	sphingosine-1-phosphate phosphatase 1	0	1.63	3.09513		11.5326	11.4632	11.5301	11.2604	11.3481	9.94126	9.79648	9.73157	9.731	9.77211
10605919	Pja1	praja1, RING-H2 motif containing	0	1.63	3.09513		11.4826	11.473	11.4643	11.5829	11.6565	10.0272	9.81394	9.91664	10.0196	9.74489
10417053	Mbnl2	muscleblind-like 2	0	1.63	3.09513		11.1419	11.0812	11.0656	11.0165	11.0046	9.6169	9.27639	9.31079	9.51924	9.4265
10480423	Abi1	abl-interactor 1	0	1.63	3.09513		11.4527	11.321	11.3713	11.3654	11.4507	9.82198	9.579	9.65796	9.80333	9.941
10512847	Alg2	asparagine-linked glycosylation 2 homolog (yeast, alpha-1,3-mannosyltransferase)	0	1.63	3.09513		9.48226	9.58862	9.53124	9.63237	9.68159	7.89735	7.80583	7.86794	8.09896	8.09628
10529239	Pisd	phosphatidylserine decarboxylase	0	1.63	3.09513		10.3522	10.3204	10.3654	10.0926	10.0418	8.58162	8.57931	8.68903	8.68937	8.49456
10604393	Elf4	E74-like factor 4 (ets domain transcription factor)	0	1.63	3.09513		8.43099	8.4255	8.29396	8.65867	8.61268	6.81178	6.91808	6.66531	6.90468	6.9643
10607658	Reps2	RALBP1 associated Eps domain containing protein 2	0	1.63	3.09513		8.40532	8.57867	8.60741	8.24348	8.22885	6.75593	6.74648	6.77354	6.90371	6.71673
10434577	Vps8	vacuolar protein sorting 8 homolog (S. cerevisiae)	0	1.63	3.09513		9.65166	9.71629	9.63458	9.26911	9.48153	7.93906	7.85063	7.85934	7.92136	8.04144
10434559	Ephb3	Eph receptor B3	0	1.63	3.09513		7.84376	7.90448	7.52741	7.7039	7.57793	6.20622	6.07114	5.98051	5.9646	6.18263
10339177			0	1.63	3.09513		11.1888	11.1519	11.2609	11.168	11.3869	9.84959	9.44913	9.42196	9.66156	9.62832
10588899	Gpx1	glutathione peroxidase 1	0	1.63	3.09513		10.0333	9.99478	9.89182	10.0111	10.0505	8.38619	8.19195	8.19434	8.65395	8.42997
10484237	Zfp385b	zinc finger protein 385B	0	1.63	3.09513		9.46401	9.13897	9.10961	9.49139	9.31652	7.6703	7.55228	7.61509	7.79703	7.745
10484227	Sestd1	SEC14 and spectrin domains 1	0	1.63	3.09513		10.5026	10.3473	10.3542	10.1076	10.047	8.73713	8.69306	8.72041	8.50236	8.55738
10443749	Ubash3a	ubiquitin associated and SH3 domain containing, A	0	1.63	3.09513		7.92533	7.8886	7.71913	7.61632	7.82965	6.01094	6.02963	6.11297	6.26071	6.43633
10338870			0	1.63	3.09513		11.9069	11.4373	11.7655	11.7208	11.8219	10.1884	9.84888	9.93494	10.2899	10.2285
10340202			0	1.63	3.09513		9.65081	9.80974	9.6356	9.43797	9.28661	7.86714	7.66431	8.03631	7.97695	8.11138
10338664			0	1.63	3.09513		9.96897	9.73882	9.92213	9.82334	9.9381	8.35973	8.21278	7.98878	8.06623	8.62596
10497931	Cflar	CASP8 and FADD-like apoptosis regulator	0	1.63	3.09513		8.90168	8.48465	8.68834	8.62315	8.58446	7.26991	6.72516	7.04396	7.20373	6.89839
10453705	Rab18	RAB18, member RAS oncogene family	0	1.63	3.09513		10.6177	10.4323	10.5196	10.894	10.8941	9.10063	8.74325	8.92448	9.2893	9.13635
10342967			0	1.63	3.09513		11.5144	11.5498	11.4415	11.9293	12.0317	9.96718	9.89066	9.95469	10.292	10.1956
10516103	Macf1	microtubule-actin crosslinking factor 1	0	1.63	3.09513		9.99631	9.50099	9.69541	9.73987	9.8982	8.17324	7.7984	7.91408	8.39533	8.38271
10450226	Ppt2	palmitoyl-protein thioesterase 2	0	1.63	3.09513		8.69147	8.76588	8.61916	9.16432	8.88104	6.96495	7.06059	6.97576	7.42869	7.54616
10364903	Amh	anti-Mullerian hormone	0	1.63	3.09513		7.0555	7.25214	6.93881	7.79208	7.76078	5.47605	5.92995	5.81684	5.9779	5.42798
10527213	Daglb	diacylglycerol lipase, beta	0	1.63	3.09513		9.29074	8.28711	8.40672	8.86906	8.21966	7.32526	6.7344	6.9952	7.09474	6.77359
10340686			0.001	1.63	3.09513		7.4246	7.13495	7.17968	7.87736	7.67516	5.33414	5.20826	5.41501	6.82341	6.34386
10430127	Zfp251	zinc finger protein 251	0	1.62	3.07375		10.6693	10.6032	10.5645	10.5645	10.6441	9.01374	8.98924	8.95442	8.93581	9.03337
10565996	Inppl1	inositol polyphosphate phosphatase-like 1	0	1.62	3.07375		10.6482	10.6764	10.5808	10.639	10.6396	9.07612	9.11655	8.94779	8.92671	9.01641
10509441	Ece1	endothelin converting enzyme 1	0	1.62	3.07375		9.62826	9.59127	9.60524	9.63219	9.62191	7.97315	7.89465	7.93747	8.0999	8.07642
10458547	Gnpda1	glucosamine-6-phosphate deaminase 1	0	1.62	3.07375		10.7315	10.5935	10.6288	10.6174	10.6585	8.98842	8.93076	8.97911	9.10726	9.13158
10456254	Nedd4l	neural precursor cell expressed, developmentally down-regulated gene 4-like	0	1.62	3.07375		8.05123	8.01585	8.03292	7.88503	7.81336	6.38574	6.32342	6.3194	6.30538	6.35657
10374415	Ppp3r1	protein phosphatase 3, regulatory subunit B, alpha isoform (calcineurin B, type I)	0	1.62	3.07375		9.97786	9.93191	9.8688	9.91137	9.91828	8.50095	8.17437	8.26764	8.39455	8.18972
10394288	Itsn2	intersectin 2	0	1.62	3.07375		9.45547	9.29826	9.44139	9.29013	9.43407	7.71699	7.66851	7.63947	7.85277	7.92478
10492310	Mbnl1	muscleblind-like 1 (Drosophila)	0	1.62	3.07375		10.5035	10.3326	10.375	10.2742	10.3286	8.91743	8.58763	8.62407	8.80293	8.79489
10596704	Gnai2	guanine nucleotide binding protein (G protein), alpha inhibiting 2	0	1.62	3.07375		11.8205	11.5836	11.7056	11.6946	11.6306	10.1275	9.95309	9.87744	10.2192	10.1486
10436666	Jam2	junction adhesion molecule 2	0	1.62	3.07375		10.5602	10.3754	10.2473	10.3048	10.3306	8.75185	8.62542	8.74051	8.95465	8.64369
10496130	Tbck	TBC1 domain containing kinase	0	1.62	3.07375		8.6022	8.57069	8.65288	8.60023	8.7496	6.98938	6.77065	6.97247	7.14427	7.22012
10399696	Rnf144a	ring finger protein 144A	0	1.62	3.07375		10.9944	10.7859	10.8271	10.7924	10.7053	9.33958	9.08599	9.0424	9.39318	9.1467
10358816	Lamc1	laminin, gamma 1	0	1.62	3.07375		8.57659	8.53144	8.53708	8.74364	8.80231	6.88031	6.91552	6.95665	7.23707	7.11855
10489266	Chd6	chromodomain helicase DNA binding protein 6	0	1.62	3.07375		8.63427	8.64699	8.45126	8.7217	8.66698	6.98734	6.88652	6.81283	7.23073	7.12527
10366667	Gns	glucosamine (N-acetyl)-6-sulfatase	0	1.62	3.07375		10.9052	10.892	10.9365	10.5896	10.6702	9.29913	9.29133	9.20149	9.12496	8.98091
10419354	Map1lc3b	microtubule-associated protein 1 light chain 3 beta	0	1.62	3.07375		11.4604	11.4225	11.382	11.645	11.6672	9.8235	9.72225	9.78372	10.079	10.0539
10513884	Tle1	transducin-like enhancer of split 1, homolog of Drosophila E(spl)	0	1.62	3.07375		9.01372	8.62981	8.68459	9.04371	8.76674	7.301	7.16498	7.0287	7.32991	7.19362
10412227	Snx18	sorting nexin 18	0	1.62	3.07375		8.58455	8.30726	8.29522	8.38037	8.4678	6.82159	6.45823	6.94692	6.94607	6.7464
10506433	Dab1	disabled homolog 1 (Drosophila)	0	1.62	3.07375		7.76396	8.16701	8.13256	7.87449	7.91755	6.14721	6.64082	6.42215	6.26792	6.29741
10588226	Amotl2	angiomotin-like 2	0	1.62	3.07375		8.52676	8.73221	8.70468	8.62681	8.73134	7.46521	6.91093	6.96774	7.07025	6.80619
10338510			0	1.62	3.07375		11.2293	11.383	11.1346	10.894	11.1095	9.49962	9.66537	9.73342	9.53766	9.19619
10338779			0	1.62	3.07375		9.51434	9.558	9.2733	9.21205	9.77819	7.56299	7.66726	7.98667	8.03407	8.00724
10425808	Tspo	translocator protein	0	1.62	3.07375		9.35131	9.64688	9.59636	8.88059	9.04599	7.55595	7.85389	7.84558	7.6556	7.50884
10607877	Prps2	phosphoribosyl pyrophosphate synthetase 2	0	1.62	3.07375		8.78369	8.9265	8.99844	8.35774	8.39579	7.35083	7.0908	7.27295	6.88188	6.77029
10582376			0	1.62	3.07375		7.4429	8.4883	8.8475	7.90877	8.89986	6.47069	6.77463	6.54024	6.83445	6.85468
10566205	Dub2a	deubiquitinating enzyme 2a	0.007	1.62	3.07375		9.82723	9.09984	8.83859	8.00299	8.56972	6.92751	6.74152	8.61569	6.36132	7.57532
10531323	G3bp2	GTPase activating protein (SH3 domain) binding protein 2	0	1.61	3.05252		12.0234	11.9291	11.9994	11.9368	11.974	10.4219	10.3356	10.3333	10.335	10.3724
10359034	Qsox1	quiescin Q6 sulfhydryl oxidase 1	0	1.61	3.05252		12.2735	12.2834	12.3046	12.3014	12.2659	10.7062	10.5905	10.6283	10.7539	10.7011
10500069	Pip5k1a	phosphatidylinositol-4-phosphate 5-kinase, type 1 alpha	0	1.61	3.05252		10.6864	10.6827	10.5968	10.6044	10.5098	9.07264	8.99149	8.92961	8.98429	9.07073
10487238	Hdc	histidine decarboxylase	0	1.61	3.05252		10.7914	10.8618	10.9402	10.7608	10.9694	9.24594	9.20824	9.30102	9.23273	9.26481
10600825	Zc3h12b	zinc finger CCCH-type containing 12B	0	1.61	3.05252		7.23256	7.15912	7.15988	7.06431	7.08878	5.52314	5.60284	5.61125	5.42176	5.48766
10484402	Ctnnd1	catenin (cadherin associated protein), delta 1	0	1.61	3.05252		10.9498	10.7915	10.7963	10.9411	10.8928	9.26214	9.14193	9.18904	9.33593	9.40423
10394812	LOC100043371	similar to development and differentiation enhancing factor 2	0	1.61	3.05252		9.05003	9.15878	9.16918	9.13235	9.25406	7.37668	7.62094	7.54755	7.43224	7.73339
10599627	Hprt	hypoxanthine guanine phosphoribosyl transferase	0	1.61	3.05252		10.3918	10.2734	10.4028	10.3953	10.4974	8.94266	8.58105	8.70334	8.93944	8.76448
10406676	Lhfpl2	lipoma HMGIC fusion partner-like 2	0	1.61	3.05252		9.05214	8.96079	9.14345	8.73814	8.77875	7.41774	7.29717	7.28332	7.28255	7.31957
10567173	Pik3c2a	phosphatidylinositol 3-kinase, C2 domain containing, alpha polypeptide	0	1.61	3.05252		10.7804	10.4769	10.6342	10.6691	10.5831	9.04832	8.86802	8.86345	9.23035	9.06116
10601390	Pgk1	phosphoglycerate kinase 1	0	1.61	3.05252		10.0065	9.81725	10.0047	10.174	10.0887	8.44026	8.21115	8.40012	8.59121	8.39922
10491106	Pld1	phospholipase D1	0	1.61	3.05252		7.86854	8.11298	8.07786	7.69704	7.83476	6.39327	6.24426	6.31641	6.40434	6.16675
10344325			0	1.61	3.05252		10.0784	9.86351	9.8774	9.55059	9.91723	8.29582	8.16717	8.26891	8.35265	8.17119
10398569	Zfp839	zinc finger protein 839	0	1.61	3.05252		9.28423	9.05832	9.09273	9.45616	9.44606	7.57134	7.56189	7.53439	7.78116	7.85439
10396699	Fntb	farnesyltransferase, CAAX box, beta	0	1.61	3.05252		7.76836	7.83046	7.92139	8.23222	8.27684	6.22427	6.25915	6.39075	6.44808	6.63697
10521678	Cd38	CD38 antigen	0	1.61	3.05252		6.82671	7.61231	7.35422	7.10425	7.24475	5.51334	5.88911	5.7731	5.32367	5.57017
10546450	Adamts9	a disintegrin-like and metallopeptidase (reprolysin type) with thrombospondin type 1 motif, 9	0	1.61	3.05252		7.13035	7.44156	7.05424	7.15794	7.37129	5.05097	5.60911	5.9687	5.79946	5.67795
10395414	Tmem195	transmembrane protein 195	0	1.61	3.05252		7.20536	6.436	6.42401	6.76411	6.52085	5.27743	4.71498	4.82266	5.42812	5.04556
10556456	Tead1	TEA domain family member 1	0	1.6	3.03143		8.96965	8.97939	9.0463	9.07513	8.90205	7.53496	7.38929	7.32833	7.39899	7.32182
10511975	Slc35a1	solute carrier family 35 (CMP-sialic acid transporter), member 1	0	1.6	3.03143		8.49224	8.3991	8.44844	8.35037	8.34421	6.84819	6.66626	6.76353	6.82011	6.91494
10556082	Ppfibp2	PTPRF interacting protein, binding protein 2 (liprin beta 2)	0	1.6	3.03143		10.5393	10.4247	10.5341	10.3862	10.4387	8.96591	8.90351	8.90282	8.71969	8.83702
10500133	Prune	prune homolog (Drosophila)	0	1.6	3.03143		9.78637	9.67689	9.82446	9.88775	9.88508	8.2333	8.24612	8.09541	8.19925	8.30301
10478196	Top1	topoisomerase (DNA) I	0	1.6	3.03143		11.1249	11.0366	11.0917	11.0632	11.0084	9.64363	9.32574	9.48479	9.43228	9.44398
10346191	Stat1	signal transducer and activator of transcription 1	0	1.6	3.03143		9.87429	9.78692	9.76766	9.67196	9.61456	8.21623	8.22376	8.17213	8.15019	7.9328
10366705	Gm9081	predicted gene 9081	0	1.6	3.03143		10.647	10.3541	10.612	10.3909	10.469	8.75217	8.8944	8.91109	9.01486	8.8984
10557177	Prkcb	protein kinase C, beta	0	1.6	3.03143		8.67697	8.44895	8.51514	8.50645	8.551	6.93566	7.02083	6.80275	7.14609	6.81712
10433656	Mkl2	MKL/myocardin-like 2	0	1.6	3.03143		9.72604	9.72517	9.70514	9.70088	9.81077	8.09511	8.00886	7.96078	8.32415	8.28302
10441270	Ripk4	receptor-interacting serine-threonine kinase 4	0	1.6	3.03143		8.33018	8.45585	8.5023	8.22842	8.30886	6.83361	6.83557	6.72925	6.53682	6.87434
10544089	Zc3hav1	zinc finger CCCH type, antiviral 1	0	1.6	3.03143		7.71292	7.99092	8.02386	7.78379	8.05472	6.34733	6.25827	6.19828	6.41488	6.35411
10512714	Shb	src homology 2 domain-containing transforming protein B	0	1.6	3.03143		8.76202	8.67359	8.75078	8.9465	9.03802	7.09176	7.22478	7.16582	7.33496	7.33226
10365891	Tmcc3	transmembrane and coiled coil domains 3	0	1.6	3.03143		9.39053	9.04885	9.0583	9.19263	9.24401	7.65574	7.51774	7.53787	7.45361	7.75807
10362711	9030224M15Rik	RIKEN cDNA 9030224M15 gene	0	1.6	3.03143		7.8148	7.75814	7.98165	7.55227	7.65972	6.28836	6.09007	6.01453	6.10546	6.25333
10562651	C330019L16Rik	RIKEN cDNA C330019L16 gene	0	1.6	3.03143		8.41755	8.47133	8.48464	8.64406	8.73514	6.90363	6.76736	6.86353	7.04324	7.189
10418185	D14Ertd449e	DNA segment, Chr 14, ERATO Doi 449, expressed	0	1.6	3.03143		9.41749	9.32615	9.47258	8.93002	9.09829	7.75625	7.67074	7.70427	7.54452	7.56472
10580233	Gcdh	glutaryl-Coenzyme A dehydrogenase	0	1.6	3.03143		8.80531	8.87331	8.9213	8.51783	8.5264	7.39227	7.07091	7.1428	7.07922	6.9533
10418210	D14Ertd449e	DNA segment, Chr 14, ERATO Doi 449, expressed	0	1.6	3.03143		9.21423	9.31796	9.32633	8.80506	8.95296	7.65017	7.53509	7.58104	7.4576	7.37412
10442691	Clcn7	chloride channel 7	0	1.6	3.03143		10.2505	10.1186	10.1997	9.75823	9.888	8.73101	8.31989	8.33782	8.36657	8.43534
10399675			0	1.6	3.03143		7.4495	6.93901	7.03053	7.43686	7.21214	5.5454	5.52941	5.66129	5.88047	5.47035
10339746			0	1.6	3.03143		10.6974	10.7033	10.6674	10.334	10.2019	8.91097	8.6056	9.05696	9.09444	8.9232
10343152			0	1.6	3.03143		10.1092	9.51823	9.61058	10.0174	9.9288	8.2324	8.0558	8.09411	8.44102	8.34433
10503166	Chd7	chromodomain helicase DNA binding protein 7	0	1.6	3.03143		7.49535	7.35419	7.03266	7.90602	7.83311	6.15563	5.63937	6.02069	5.9326	5.85268
10437885	Myh11	myosin, heavy polypeptide 11, smooth muscle	0	1.6	3.03143		10.1584	10.2579	10.0919	9.45561	9.54727	8.2473	8.06419	8.24058	8.38463	8.56872
10417972	Camk2g	calcium/calmodulin-dependent protein kinase II gamma	0	1.59	3.01049		10.2552	10.2085	10.2605	10.1006	10.1838	8.6231	8.5823	8.63845	8.61702	8.57989
10543306	Tspan12	tetraspanin 12	0	1.59	3.01049		8.73946	8.98368	8.83104	8.7812	8.82342	7.35926	7.12873	7.18057	7.24374	7.27611
10558134	Plekha1	pleckstrin homology domain containing, family A (phosphoinositide binding specific) member 1	0	1.59	3.01049		9.22001	9.11396	9.08772	8.95731	8.95091	7.51282	7.35582	7.45924	7.59341	7.46685
10435237	Zfp148	zinc finger protein 148	0	1.59	3.01049		10.0294	9.99279	9.98284	10.0148	9.84566	8.46437	8.25823	8.25143	8.5446	8.40017
10605090	Idh3g	isocitrate dehydrogenase 3 (NAD+), gamma	0	1.59	3.01049		10.5084	10.3827	10.4406	10.3903	10.3778	8.95477	8.60719	8.76905	8.88202	8.91205
10580457	N4bp1	NEDD4 binding protein 1	0	1.59	3.01049		10.5245	10.4689	10.49	10.6107	10.6426	8.91188	8.82708	8.91741	8.94336	9.17664
10541246	Il17ra	interleukin 17 receptor A	0	1.59	3.01049		8.6669	8.65338	8.63427	8.74291	8.3714	7.1253	6.98816	6.99155	6.99336	7.02963
10551169	B3gnt8	UDP-GlcNAc:betaGal beta-1,3-N-acetylglucosaminyltransferase 8	0	1.59	3.01049		8.12983	7.96927	7.97083	7.94793	8.04376	6.42671	6.56023	6.48518	6.4399	6.20194
10606658	Trmt2b	TRM2 tRNA methyltransferase 2 homolog B (S. cerevisiae)	0	1.59	3.01049		8.48514	8.47882	8.37435	8.57003	8.35785	6.91977	6.79468	6.67003	6.98264	6.93632
10405163	Spin1	spindlin 1	0	1.59	3.01049		10.9615	10.7508	10.851	10.8113	10.745	9.34053	9.09483	9.06368	9.33331	9.34394
10523647	Aff1	AF4/FMR2 family, member 1	0	1.59	3.01049		8.32733	8.17171	8.11511	8.41168	8.21124	6.71739	6.49819	6.53458	6.8247	6.72305
10605811	Fam123b	family with sequence similarity 123, member B	0	1.59	3.01049		8.34985	8.25617	8.3832	8.12443	8.2621	6.70646	6.55051	6.92363	6.53232	6.69926
10405343	Tspan17	tetraspanin 17	0	1.59	3.01049		9.21269	9.10958	9.02512	8.8563	8.78233	7.45154	7.36863	7.49531	7.40985	7.32501
10505270	Slc31a2	solute carrier family 31, member 2	0	1.59	3.01049		10.4625	10.3839	10.3083	10.5835	10.489	8.98681	8.7515	8.66816	9.05378	8.82026
10348424	Sh3bp4	SH3-domain binding protein 4	0	1.59	3.01049		8.48266	8.56278	8.62624	8.35515	8.63251	6.83955	6.95071	6.89111	6.80489	7.20383
10478364	Tox2	TOX high mobility group box family member 2	0	1.59	3.01049		8.35864	8.3012	8.44546	8.53253	8.71538	6.83347	6.76599	7.0521	6.80287	6.94324
10400189	Gm7172	predicted gene 7172	0	1.59	3.01049		11.4958	11.5359	11.4652	11.2584	11.3625	9.94728	9.96196	9.95042	9.70968	9.60409
10392936	Nt5c	5',3'-nucleotidase, cytosolic	0	1.59	3.01049		10.2351	10.1579	9.87492	10.1505	10.0829	8.4449	8.33067	8.39196	8.6917	8.70954
10349711	Slc41a1	solute carrier family 41, member 1	0	1.59	3.01049		9.77014	9.9244	9.8423	10.0139	10.1195	8.23654	8.25398	8.13735	8.55742	8.54794
10400030	Bzw2	basic leucine zipper and W2 domains 2	0	1.59	3.01049		8.17645	7.84277	7.90971	8.22058	8.14125	6.47848	6.18747	6.44004	6.62117	6.63811
10405047	Aspn	asporin	0	1.59	3.01049		5.62103	5.96837	5.78334	6.2291	6.02857	4.18707	4.30731	4.35053	4.48769	4.33325
10338446			0	1.59	3.01049		10.7409	10.4433	10.6991	10.7318	10.7691	9.0307	8.81191	8.96447	9.19091	9.41681
10556302	Ampd3	adenosine monophosphate deaminase 3	0	1.59	3.01049		7.98219	7.60527	7.60261	7.59834	7.33552	6.10567	5.94217	6.05787	6.23605	5.84453
10434191	Txnrd2	thioredoxin reductase 2	0	1.59	3.01049		8.49084	8.65568	8.55246	8.09113	8.12376	6.93228	6.56901	6.99944	6.72967	6.74408
10500802	Atg4a	autophagy-related 4A (yeast)	0	1.59	3.01049		8.75759	8.58905	8.50306	8.58973	8.89397	7.35281	7.07664	6.69386	7.33123	6.93708
10340051			0	1.59	3.01049		9.38193	8.85217	8.90936	9.45361	8.96345	7.53377	7.47996	7.30396	7.9114	7.37112
10369525	2010107G23Rik	RIKEN cDNA 2010107G23 gene	0	1.59	3.01049		9.26095	9.44943	9.37955	8.39571	8.47674	7.59711	7.55129	7.51496	7.06488	7.30327
10366848	B4galnt1	beta-1,4-N-acetyl-galactosaminyl transferase 1	0	1.58	2.9897		10.0743	9.93283	9.95859	10.004	9.967	8.43319	8.48112	8.42492	8.3511	8.3316
10538755	Smarcad1	SWI/SNF-related, matrix-associated actin-dependent regulator of chromatin, subfamily a, containing DEAD/H box 1	0	1.58	2.9897		10.0115	10.0155	10.0909	9.89215	10.0851	8.527	8.34672	8.40928	8.4565	8.47134
10363430	Psap	prosaposin	0	1.58	2.9897		13.5932	13.5144	13.5158	13.5436	13.5241	12.0959	11.8444	11.8036	12.0254	11.9995
10448582	Mlst8	MTOR associated protein, LST8 homolog (S. cerevisiae)	0	1.58	2.9897		9.44824	9.67929	9.75729	9.64928	9.71088	8.01663	8.04451	8.13674	7.97856	8.17113
10449266	Itfg3	integrin alpha FG-GAP repeat containing 3	0	1.58	2.9897		11.7192	11.6899	11.722	11.6602	11.7081	10.3601	10.0044	9.98745	10.1846	10.041
10351738	Pex19	peroxisomal biogenesis factor 19	0	1.58	2.9897		10.9074	10.8675	10.7552	10.9503	10.896	9.20372	9.23266	9.17061	9.34203	9.52337
10509790	Aldh4a1	aldehyde dehydrogenase 4 family, member A1	0	1.58	2.9897		8.73998	8.94215	8.87371	8.5766	8.64298	7.24031	7.10309	7.09062	7.20822	7.21242
10373950	Nipsnap1	4-nitrophenylphosphatase domain and non-neuronal SNAP25-like protein homolog 1 (C. elegans)	0	1.58	2.9897		8.57908	8.50407	8.75323	8.33337	8.51388	7.06426	6.89265	6.96445	6.98209	6.86049
10419638	Chd8	chromodomain helicase DNA binding protein 8	0	1.58	2.9897		10.1456	10.0288	10.1223	10.2186	10.1192	8.52129	8.39462	8.4065	8.65882	8.75909
10462363	Jak2	Janus kinase 2	0	1.58	2.9897		8.72882	8.52729	8.69842	8.57435	8.71538	7.20398	6.91456	6.89922	7.20784	7.11753
10389421	Ints2	integrator complex subunit 2	0	1.58	2.9897		10.511	10.3578	10.2889	10.2415	10.1128	8.8846	8.71581	8.66579	8.71713	8.61474
10564960	Furin	furin (paired basic amino acid cleaving enzyme)	0	1.58	2.9897		9.22731	8.98863	9.05606	9.33024	9.31453	7.59675	7.48507	7.51815	7.68371	7.72337
10375893	Sar1b	SAR1 gene homolog B (S. cerevisiae)	0	1.58	2.9897		11.5319	11.4041	11.4065	11.6865	11.6494	9.86549	9.84022	9.83891	10.1452	10.0768
10558265	Lhpp	phospholysine phosphohistidine inorganic pyrophosphate phosphatase	0	1.58	2.9897		9.63258	9.74173	9.78582	9.3707	9.55185	8.0303	7.91492	8.14816	7.90487	8.17714
10502951	Acadm	acyl-Coenzyme A dehydrogenase, medium chain	0	1.58	2.9897		10.6225	10.4457	10.5419	10.5612	10.5831	9.187	8.66509	8.99742	9.08569	8.9015
10342017			0	1.58	2.9897		9.83685	9.70093	9.40203	9.44697	9.33201	8.01435	7.91071	7.8569	8.02868	7.99711
10532896	2610524H06Rik	RIKEN cDNA 2610524H06 gene	0	1.58	2.9897		9.88954	9.75678	9.92203	9.58599	9.49779	8.3009	7.94986	8.16953	8.29203	8.0314
10397633	Flrt2	fibronectin leucine rich transmembrane protein 2	0	1.58	2.9897		8.21198	8.38797	8.13754	7.96076	7.93152	6.68086	6.66682	6.3949	6.62865	6.35418
10450116	Slc39a7	solute carrier family 39 (zinc transporter), member 7	0	1.58	2.9897		9.97991	9.81897	9.79236	9.52647	9.37366	8.12875	8.03493	8.01109	8.24098	8.15898
10530536	Tec	tec protein tyrosine kinase	0	1.58	2.9897		7.01231	7.27156	7.29404	7.18048	7.33801	5.78582	5.53195	5.81721	5.7767	5.29139
10405619	5133401N09Rik	RIKEN cDNA 5133401N09 gene	0	1.58	2.9897		10.1572	9.8251	10.006	9.96598	9.95319	8.75578	8.15546	8.31004	8.53214	8.24433
10535025	Got2	glutamate oxaloacetate transaminase 2, mitochondrial	0	1.58	2.9897		10.0799	10.1638	10.1779	9.59702	9.88661	8.61059	8.31998	8.23182	8.47093	8.35645
10466624	Aldh1a7	aldehyde dehydrogenase family 1, subfamily A7	0	1.58	2.9897		10.3685	10.0072	9.96488	10.2095	10.2244	8.53518	8.32059	8.49076	8.95585	8.5512
10408937	Atxn1	ataxin 1	0	1.58	2.9897		8.07661	7.77439	7.79995	8.27223	7.88023	6.43288	6.06122	6.46149	6.57789	6.38542
10527571			0	1.58	2.9897		9.95493	9.65037	9.37116	9.89359	9.87441	7.93915	8.14294	8.13347	8.34989	8.30236
10591967	Jam3	junction adhesion molecule 3	0	1.58	2.9897		9.77381	9.88823	9.94237	10.0453	10.3312	8.27199	8.17348	8.36527	8.56875	8.68675
10343067			0	1.58	2.9897		8.90406	8.22754	8.54195	8.75723	8.55725	7.35314	6.8814	6.78608	6.82375	7.24914
10342157			0	1.58	2.9897		10.0091	9.79737	9.66523	9.33965	9.36721	8.23914	8.12887	8.24231	8.1294	7.52124
10344058			0	1.58	2.9897		9.21872	9.32264	9.19134	9.2912	9.14444	7.78995	7.51108	7.03027	7.83108	8.11538
10342359			0	1.57	2.96905		12.3885	12.3446	12.416	12.3573	12.3835	10.8194	10.8326	10.7557	10.8595	10.7956
10576439	Cog2	component of oligomeric golgi complex 2	0	1.57	2.96905		11.0141	10.9806	11.0102	10.9313	10.941	9.382	9.36537	9.44311	9.43322	9.42167
10518113	9030409G11Rik	RIKEN cDNA 9030409G11 gene	0	1.57	2.96905		8.50833	8.45186	8.35128	8.51663	8.58939	6.87521	6.90541	6.93333	6.92552	6.92306
10529445	Lrpap1	low density lipoprotein receptor-related protein associated protein 1	0	1.57	2.96905		11.909	11.9317	11.8864	11.8271	11.8217	10.2421	10.2152	10.2922	10.381	10.4165
10355162	Plekhm3	pleckstrin homology domain containing, family M, member 3	0	1.57	2.96905		8.52546	8.60087	8.53367	8.41019	8.68405	7.01107	6.91548	7.00881	6.99513	6.98295
10582123	Hsdl1	hydroxysteroid dehydrogenase like 1	0	1.57	2.96905		9.25398	9.2751	9.23392	9.25603	9.13674	7.81479	7.5214	7.67351	7.69087	7.58391
10480901	Nacc2	nucleus accumbens associated 2, BEN and BTB (POZ) domain containing	0	1.57	2.96905		9.26657	9.00196	9.09307	8.98734	9.01653	7.41968	7.43112	7.47102	7.56294	7.61637
10463173	Zdhhc16	zinc finger, DHHC domain containing 16	0	1.57	2.96905		9.50857	9.36007	9.31588	9.34417	9.27383	7.81444	7.60336	7.79882	7.81956	7.92771
10559261	Cd81	CD81 antigen	0	1.57	2.96905		12.4803	12.4181	12.4479	12.3763	12.2873	10.996	10.6341	10.8064	10.8864	10.84
10556442	Tead1	TEA domain family member 1	0	1.57	2.96905		7.94502	8.18843	8.12919	8.07237	8.04983	6.35322	6.55918	6.44482	6.48118	6.68124
10596545	Rad54l2	RAD54 like 2 (S. cerevisiae)	0	1.57	2.96905		10.5334	10.2333	10.2775	10.5627	10.3383	8.76712	8.74903	8.7374	8.95226	8.88057
10463229	Zfyve27	zinc finger, FYVE domain containing 27	0	1.57	2.96905		10.9536	10.8876	10.8545	10.599	10.5886	9.26993	9.22842	9.15016	9.23873	9.1397
10461439	Fads1	fatty acid desaturase 1	0	1.57	2.96905		11.7434	11.7177	11.7582	11.3845	11.5129	10.1313	10.0576	10.1435	9.93745	9.99961
10409294	Sptlc1	serine palmitoyltransferase, long chain base subunit 1	0	1.57	2.96905		10.7548	10.8292	10.8765	10.4353	10.5514	9.12693	9.04736	9.19359	9.03379	9.18118
10457071	Cyb5	cytochrome b-5	0	1.57	2.96905		10.5737	10.43	10.4992	10.2968	10.6013	9.0362	8.88541	9.06731	8.92653	8.65987
10445898	Rab5a	RAB5A, member RAS oncogene family	0	1.57	2.96905		11.1157	11.1432	11.0295	10.8177	10.8693	9.64446	9.40842	9.45724	9.27397	9.32704
10418027	Comtd1	catechol-O-methyltransferase domain containing 1	0	1.57	2.96905		8.18285	8.52314	8.32279	8.08567	8.18047	6.64051	6.57751	6.86605	6.61877	6.75029
10506188	Pgm2	phosphoglucomutase 2	0	1.57	2.96905		9.30814	9.53659	9.63475	9.24623	9.41183	7.96819	7.65755	7.87153	7.98821	7.78733
10343302			0	1.57	2.96905		10.3179	9.87728	9.84934	10.1168	10.0308	8.38502	8.44598	8.37099	8.62097	8.49607
10340721			0	1.57	2.96905		10.122	9.98651	9.90078	9.8252	10.2755	8.28484	8.30704	8.58452	8.59662	8.49642
10467739	Avpi1	arginine vasopressin-induced 1	0	1.57	2.96905		9.13634	9.226	8.9699	8.84302	8.72133	7.33998	7.61933	7.2999	7.44563	7.36625
10339296			0	1.57	2.96905		10.0808	10.1926	10.0597	10.434	10.3664	8.68449	8.74534	8.48891	8.45356	8.90855
10447885	Acat3	acetyl-Coenzyme A acetyltransferase 3	0	1.57	2.96905		8.48293	8.51254	8.61205	8.86237	8.86127	6.9821	6.87915	7.29383	7.28179	7.03712
10419854	Slc7a8	solute carrier family 7 (cationic amino acid transporter, y+ system), member 8	0	1.57	2.96905		10.6163	10.514	10.6053	10.6289	10.6704	9.29706	8.7006	8.84832	9.28789	9.04597
10338772			0	1.57	2.96905		8.75217	8.40402	8.33393	8.80191	9.00345	7.11525	6.85654	6.9486	7.06365	7.4849
10496001	Cfi	complement component factor i	0	1.57	2.96905		6.84364	6.96309	6.35759	6.97763	6.16257	5.18	5.02626	5.08361	5.21219	4.97202
10342380			0	1.57	2.96905		8.64152	8.13441	8.19802	8.7611	8.03638	6.78206	6.94762	6.99027	6.84345	6.34348
10416195	Nkx3-1	NK-3 transcription factor, locus 1 (Drosophila)	0	1.57	2.96905		8.38205	7.69827	7.90077	8.11446	8.30374	6.78951	5.98422	6.70415	6.62663	6.45874
10368092	Hebp2	heme binding protein 2	0	1.57	2.96905		9.52801	8.56288	8.68255	8.69151	8.24592	7.44214	6.81446	7.42629	7.34268	6.83659
10511258	Fam132a	family with sequence similarity 132, member A	0.001	1.57	2.96905		9.22396	7.99275	7.8044	8.97266	7.67058	7.11744	6.59109	6.50962	7.23974	6.3582
10573867	Rbl2	retinoblastoma-like 2	0	1.56	2.94854		10.2011	10.1043	10.1593	10.0867	10.1075	8.50741	8.60315	8.57961	8.44216	8.71704
10358259	Nek7	NIMA (never in mitosis gene a)-related expressed kinase 7	0	1.56	2.94854		9.26107	9.08628	9.10769	9.06046	9.12783	7.64967	7.46748	7.50846	7.65314	7.56155
10474725	Eif2ak4	eukaryotic translation initiation factor 2 alpha kinase 4	0	1.56	2.94854		8.55567	8.64432	8.56322	8.72654	8.73445	7.1695	7.07448	6.92001	7.11099	7.12593
10582275	Slc7a5	solute carrier family 7 (cationic amino acid transporter, y+ system), member 5	0	1.56	2.94854		12.8318	12.654	12.7204	12.7733	12.6987	11.2806	11.1377	11.0132	11.2121	11.2587
10487513	Anapc1	anaphase promoting complex subunit 1	0	1.56	2.94854		11.5543	11.361	11.5349	11.2916	11.3766	9.95373	9.80791	9.76583	9.85663	9.93487
10595000	Tmod3	tropomodulin 3	0	1.56	2.94854		10.4816	10.3424	10.2491	10.4722	10.4044	9.01701	8.67456	8.7646	8.84555	8.84163
10381697	Hexim1	hexamethylene bis-acetamide inducible 1	0	1.56	2.94854		9.45319	9.25547	9.37115	9.4413	9.50799	7.88063	7.60797	7.86033	7.99562	7.89379
10463599	Nfkb2	nuclear factor of kappa light polypeptide gene enhancer in B-cells 2, p49/p100	0	1.56	2.94854		8.29267	8.08189	8.05141	8.27634	8.3129	6.55217	6.66324	6.79431	6.45351	6.75184
10605788	Zxda	zinc finger, X-linked, duplicated A	0	1.56	2.94854		8.57842	8.6896	8.61737	8.87476	8.92049	7.10611	7.16398	7.09054	7.15831	7.37245
10578771	Galnt7	UDP-N-acetyl-alpha-D-galactosamine: polypeptide N-acetylgalactosaminyltransferase 7	0	1.56	2.94854		8.81572	9.06922	8.91983	8.7688	8.76615	7.21716	7.27696	7.14575	7.45677	7.46593
10602164	Rbbp7	retinoblastoma binding protein 7	0	1.56	2.94854		11.6851	11.4212	11.5345	11.5402	11.5444	10.1125	9.77959	9.81491	10.1175	10.0946
10582231	Fbxo31	F-box protein 31	0	1.56	2.94854		9.99536	9.87671	9.95033	9.60785	9.66557	8.35511	8.22519	8.12433	8.24924	8.33435
10542340	8430419L09Rik	RIKEN cDNA 8430419L09 gene	0	1.56	2.94854		10.5993	10.7586	10.6234	10.3011	10.514	8.88273	9.1625	8.98906	8.91279	9.06435
10539592	Smyd5	SET and MYND domain containing 5	0	1.56	2.94854		9.10344	9.24182	9.24299	8.78915	8.9381	7.56231	7.46846	7.58245	7.50001	7.37897
10411804			0	1.56	2.94854		8.5219	8.07854	8.20707	8.56411	8.58303	6.7154	6.77661	6.83393	6.84982	6.97061
10597477	Gpd1l	glycerol-3-phosphate dehydrogenase 1-like	0	1.56	2.94854		8.77397	8.3801	8.31008	8.39418	8.28537	7.1537	6.84229	6.74704	6.85719	6.76506
10368739	Gtf3c6	general transcription factor IIIC, polypeptide 6, alpha	0	1.56	2.94854		8.80016	8.71296	8.67923	8.96728	9.01012	7.25229	6.9751	7.14615	7.5523	7.46734
10383133	Slc26a11	solute carrier family 26, member 11	0	1.56	2.94854		8.55945	8.69731	8.57166	8.07999	8.13766	6.89728	6.84307	6.94593	6.82297	6.73158
10602255	Zcchc16	zinc finger, CCHC domain containing 16	0	1.56	2.94854		7.51313	7.10109	7.38715	7.3445	7.26008	5.84068	5.83483	5.63795	5.4049	6.07752
10338674			0	1.56	2.94854		11.5611	11.0145	11.375	11.5381	11.327	9.96245	9.82509	9.54953	10.0987	9.59361
10574488	Pdp2	pyruvate dehyrogenase phosphatase catalytic subunit 2	0	1.56	2.94854		7.25191	7.19058	6.83104	7.09368	7.36351	5.82683	5.33557	5.34762	5.88172	5.549
10362138	Vnn1	vanin 1	0	1.56	2.94854		7.79833	7.63254	7.35102	7.86795	7.2239	6.33194	5.95978	6.05731	5.9945	5.70591
10420030	Psme2	proteasome (prosome, macropain) 28 subunit, beta	0	1.56	2.94854		9.59501	9.86418	9.76274	8.9583	8.95355	8.01004	7.79126	8.03126	7.66103	7.84695
10466745	Tjp2	tight junction protein 2	0	1.55	2.92817		10.9833	10.9027	11.0279	10.9799	10.9025	9.4322	9.41968	9.36322	9.47522	9.33591
10382462	Slc9a3r1	solute carrier family 9 (sodium/hydrogen exchanger), member 3 regulator 1	0	1.55	2.92817		10.121	10.2563	10.2432	10.134	10.2564	8.63479	8.64785	8.60688	8.66823	8.71238
10407570	Zmynd11	zinc finger, MYND domain containing 11	0	1.55	2.92817		10.0347	9.96445	10.061	10.0648	9.99948	8.52539	8.48032	8.44411	8.3801	8.56364
10595831	Zbtb38	zinc finger and BTB domain containing 38	0	1.55	2.92817		8.31935	8.38545	8.44716	8.18701	8.26585	6.85051	6.71913	6.68708	6.81532	6.7953
10499080	Arfip1	ADP-ribosylation factor interacting protein 1	0	1.55	2.92817		8.669	8.50449	8.62321	8.51791	8.60233	7.00218	7.02288	7.05513	7.19711	6.9102
10535372	Fbxl18	F-box and leucine-rich repeat protein 18	0	1.55	2.92817		9.21295	9.08026	8.99472	9.09769	9.21568	7.59206	7.4907	7.52616	7.70352	7.51896
10420837	Extl3	exostoses (multiple)-like 3	0	1.55	2.92817		8.52052	8.47295	8.50531	8.66672	8.551	6.9249	7.11894	6.89731	7.10182	6.92859
10344422			0	1.55	2.92817		11.198	11.1642	11.1694	11.4119	11.2933	9.78856	9.71396	9.59988	9.59499	9.77971
10581336	Gfod2	glucose-fructose oxidoreductase domain containing 2	0	1.55	2.92817		8.39202	8.26779	8.3433	8.22516	8.38951	6.93772	6.77223	6.70414	6.8225	6.60902
10553568	Tubgcp5	tubulin, gamma complex associated protein 5	0	1.55	2.92817		9.91685	9.70309	9.64206	9.78097	9.82145	8.35702	8.09091	8.12394	8.21479	8.30741
10342416			0	1.55	2.92817		12.3412	12.2344	12.3276	12.2306	12.3495	10.9548	10.7401	10.5522	10.8115	10.6573
10546476	Magi1	membrane associated guanylate kinase, WW and PDZ domain containing 1	0	1.55	2.92817		8.29236	8.01531	8.40782	8.23461	8.2303	6.7777	6.60835	6.78184	6.71073	6.53479
10418247	Pde12	phosphodiesterase 12	0	1.55	2.92817		8.874	8.6963	8.85007	8.96213	9.15839	7.32646	7.27718	7.25046	7.48267	7.44917
10455801	Phax	phosphorylated adaptor for RNA export	0	1.55	2.92817		8.82286	8.60454	8.58592	8.87538	8.92456	7.05026	7.14407	7.18022	7.32149	7.37985
10342366			0	1.55	2.92817		12.5424	12.2609	12.4209	12.1451	12.2709	10.908	10.652	10.8266	10.9033	10.6014
10339823			0	1.55	2.92817		10.5518	10.4669	10.4206	10.4702	10.3482	8.86518	8.67475	8.77034	8.98522	9.21036
10413598	Tmem110	transmembrane protein 110	0	1.55	2.92817		8.16831	8.09091	8.06379	7.94946	7.97328	6.67346	6.38427	6.49493	6.73069	6.19545
10344180			0	1.55	2.92817		10.4844	10.2149	10.2039	10.3497	10.1214	8.84848	8.52299	8.52583	8.768	8.96275
10380551	Phb	prohibitin	0	1.55	2.92817		10.4889	10.3954	10.4582	10.548	10.6176	8.87477	8.68072	8.77744	9.18399	9.22961
10606910	Mcart6	mitochondrial carrier triple repeat 6	0	1.55	2.92817		7.41587	7.24125	7.36161	6.87798	7.09449	5.93249	5.63776	5.67837	5.48659	5.50549
10502419	Rap1gds1	RAP1, GTP-GDP dissociation stimulator 1	0	1.55	2.92817		8.06454	7.95898	8.13826	8.17304	8.32027	6.65071	6.16013	6.63312	6.5756	6.87492
10594855	Cgnl1	cingulin-like 1	0	1.55	2.92817		9.68887	9.11804	9.08938	9.26683	9.37915	7.76669	7.50674	7.72532	7.87207	7.94293
10338984			0	1.55	2.92817		8.52826	8.42244	8.23924	9.03634	8.84915	7.30688	6.7218	6.99096	7.16904	7.11248
10579607	Cnot8	CCR4-NOT transcription complex, subunit 8	0	1.55	2.92817		8.00907	7.92934	8.31929	8.72546	8.47669	6.35019	6.30039	6.99776	6.92811	7.14281
10483163	Grb14	growth factor receptor bound protein 14	0	1.55	2.92817		8.8082	8.11961	8.22935	9.09705	8.82977	6.89251	6.90677	6.60207	7.51234	7.41565
10601854	Wbp5	WW domain binding protein 5	0.001	1.55	2.92817		9.15055	8.85349	8.75913	10.0283	9.82731	7.73053	7.21789	7.35759	8.39176	8.1886
10416940			0	1.54	2.90795		12.2843	12.1795	12.2258	12.1701	12.2397	10.7023	10.6532	10.607	10.6615	10.752
10481453	Dolk	dolichol kinase	0	1.54	2.90795		8.37077	8.43098	8.31878	8.49531	8.35213	6.92261	6.75463	6.89419	6.79979	6.87718
10587780	Tuba1b	tubulin, alpha 1B	0	1.54	2.90795		13.4853	13.4715	13.5139	13.3811	13.4111	12.0169	11.966	11.9815	11.8021	11.7995
10419223	Fermt2	fermitin family homolog 2 (Drosophila)	0	1.54	2.90795		9.51025	9.41331	9.51027	9.25888	9.36984	7.99388	7.81451	7.86683	7.87113	7.82768
10578123	Rbpms	RNA binding protein gene with multiple splicing	0	1.54	2.90795		9.74226	9.84613	9.88883	9.60551	9.80012	8.34688	8.17125	8.11093	8.29364	8.27076
10427928	Trio	triple functional domain (PTPRF interacting)	0	1.54	2.90795		8.68592	8.43798	8.45077	8.5557	8.50472	7.12667	6.85379	6.88106	7.10839	6.95732
10343227			0	1.54	2.90795		12.535	12.4207	12.4631	12.3899	12.3823	11.0128	11.0542	10.7927	10.6981	10.9479
10592655	Arhgef12	Rho guanine nucleotide exchange factor (GEF) 12	0	1.54	2.90795		10.2143	10.1287	10.0971	10.2634	10.3456	8.67934	8.5577	8.51319	8.83483	8.77132
10382985	Afmid	arylformamidase	0	1.54	2.90795		8.31482	8.4093	8.32673	8.1535	8.10258	6.8284	6.6818	6.83881	6.67541	6.56422
10546092			0	1.54	2.90795		9.88202	9.93005	9.71082	9.68205	9.75342	8.27538	8.20618	8.44615	8.3153	8.02134
10339225			0	1.54	2.90795		11.783	11.7608	11.8333	11.5594	11.5037	10.2545	10.1887	10.0595	9.99016	10.267
10338727			0	1.54	2.90795		11.6379	11.5836	11.6044	11.4833	11.5189	10.0404	10.0225	9.9572	9.76921	10.3235
10599812	Zic3	zinc finger protein of the cerebellum 3	0	1.54	2.90795		8.49834	8.43027	8.31556	8.20034	8.38922	6.77755	6.74187	6.94799	6.60094	7.07037
10396306	Jkamp	JNK1/MAPK8-associated membrane protein	0	1.54	2.90795		9.43297	9.10211	9.0781	9.32986	9.05687	7.92162	7.58551	7.65887	7.71374	7.44509
10501222	Gstm2	glutathione S-transferase, mu 2	0	1.54	2.90795		11.6166	11.4975	11.5214	11.7357	11.7066	10.1548	9.81355	9.84268	10.2834	10.277
10338654			0	1.54	2.90795		10.2685	9.77928	9.74169	9.88098	9.67569	8.17117	8.41189	8.40203	8.30479	8.34611
10388884	Nlk	nemo like kinase	0	1.54	2.90795		10.4034	10.2668	10.2163	10.6001	10.4647	8.79013	8.7063	8.64641	8.926	9.16702
10580969	Got2	glutamate oxaloacetate transaminase 2, mitochondrial	0	1.54	2.90795		9.94937	10.0197	10.0171	9.46283	9.75553	8.52758	8.21345	8.13238	8.35663	8.25151
10339156			0	1.54	2.90795		11.6347	11.4397	11.6007	11.0919	11.1264	9.98311	9.703	9.83342	9.94223	9.70698
10606689	Timm8a1	translocase of inner mitochondrial membrane 8 homolog a1 (yeast)	0	1.54	2.90795		7.14026	7.05801	7.19082	7.54912	7.45487	5.74774	5.45821	5.55001	6.0076	5.90893
10339807			0	1.54	2.90795		10.603	10.4444	10.2996	10.7677	10.8981	9.20214	8.86682	8.84263	9.31248	9.09497
10342545			0	1.54	2.90795		11.4545	11.1859	11.1803	11.4742	11.5371	9.99911	9.53688	9.68256	10.2035	9.68899
10422227	Spry2	sprouty homolog 2 (Drosophila)	0	1.54	2.90795		7.67182	7.83652	7.89891	8.32655	8.10934	6.13985	6.41711	6.32783	6.48497	6.7777
10408081	Hist1h1b	histone cluster 1, H1b	0	1.54	2.90795		8.72388	8.60033	8.7405	9.35561	9.33681	7.35074	7.10457	7.23526	7.83295	7.54228
10367744			0.004	1.54	2.90795		6.35146	7.33744	7.96365	7.00424	8.05554	4.73175	6.21065	6.36764	5.58765	6.12618
10453062	Atl2	atlastin GTPase 2	0	1.53	2.88786		11.7074	11.5865	11.6362	11.5903	11.6349	10.1063	10.0192	10.075	10.1314	10.172
10603011	Rbbp7	retinoblastoma binding protein 7	0	1.53	2.88786		11.5134	11.3145	11.3301	11.4244	11.3896	9.98192	9.65882	9.79799	9.96016	9.90839
10496110	Papss1	3'-phosphoadenosine 5'-phosphosulfate synthase 1	0	1.53	2.88786		8.77077	8.88306	8.77314	8.65966	8.80371	7.32925	7.07137	7.14219	7.37304	7.33581
10406423	Mblac2	metallo-beta-lactamase domain containing 2	0	1.53	2.88786		9.32199	9.16898	9.08632	9.08414	8.9578	7.688	7.52661	7.51861	7.68696	7.52602
10418251	Appl1	adaptor protein, phosphotyrosine interaction, PH domain and leucine zipper containing 1	0	1.53	2.88786		10.3423	10.2853	10.27	10.3147	10.393	8.84487	8.64518	8.616	8.88127	8.98932
10469720	Acbd5	acyl-Coenzyme A binding domain containing 5	0	1.53	2.88786		10.9847	10.7381	10.7784	10.8277	10.8361	9.38228	9.16681	9.20771	9.52327	9.25984
10350819	Csnk2a1	casein kinase 2, alpha 1 polypeptide	0	1.53	2.88786		11.0541	11.1082	11.1127	10.8389	10.7667	9.52634	9.34935	9.38929	9.50084	9.47107
10363563	Slc25a16	solute carrier family 25 (mitochondrial carrier, Graves disease autoantigen), member 16	0	1.53	2.88786		8.94298	8.70964	8.95014	8.76426	8.74575	7.51058	7.27488	7.3102	7.27488	7.10937
10509218	Zfp46	zinc finger protein 46	0	1.53	2.88786		7.79486	7.79796	7.8684	7.96694	7.80838	6.08917	6.264	6.40736	6.28027	6.54362
10569494	Tnfrsf22	tumor necrosis factor receptor superfamily, member 22	0	1.53	2.88786		7.60852	7.81093	7.56783	7.62907	7.65316	6.37961	6.13717	6.06747	5.93641	6.09768
10343294			0	1.53	2.88786		11.6331	11.4198	11.5957	11.31	11.5509	10.177	10.0282	9.82708	9.86195	9.95497
10345368			0	1.53	2.88786		8.53807	8.53744	8.49133	8.41925	8.48567	7.06402	7.23403	6.8016	6.74987	6.9572
10589907			0	1.53	2.88786		8.06791	8.27043	8.00482	7.79725	7.92094	6.61832	6.30039	6.58296	6.49387	6.43099
10607646	Nhs	Nance-Horan syndrome (human)	0	1.53	2.88786		7.86757	8.22036	8.04817	8.39804	8.28717	6.70434	6.68972	6.65434	6.56268	6.58368
10602599	Smc1a	structural maintenance of chromosomes 1A	0	1.53	2.88786		8.81912	8.96792	9.09896	8.86264	8.97595	7.4711	7.12543	7.33771	7.53573	7.61492
10551529			0	1.53	2.88786		7.69107	7.63947	7.33312	7.64447	7.29609	6.05197	5.85844	5.86083	6.01047	6.18203
10460468	Ctsf	cathepsin F	0	1.53	2.88786		10.0325	10.4771	10.4067	10.0693	10.1414	8.60918	8.54886	8.68024	8.83355	8.79843
10339249			0	1.53	2.88786		10.4362	10.5607	10.517	10.8254	10.7914	9.0867	8.96093	8.97306	9.10438	9.36352
10373073	D10Ertd610e	DNA segment, Chr 10, ERATO Doi 610, expressed	0	1.53	2.88786		9.96251	9.57231	9.53257	9.87582	9.61914	8.16377	8.01345	7.99541	8.33747	8.40151
10360003	Dusp12	dual specificity phosphatase 12	0	1.53	2.88786		8.66396	8.459	8.46694	8.05366	7.99338	6.85252	6.83915	6.94833	6.71947	6.64306
10584572	Hspa8	heat shock protein 8	0	1.53	2.88786		13.1871	12.8274	12.8928	12.8413	12.8825	11.9239	11.0888	11.1915	11.5837	11.1699
10436941	Mrps6	mitochondrial ribosomal protein S6	0	1.53	2.88786		10.9978	10.8908	10.9568	10.2644	10.233	9.34328	9.14091	9.43875	8.90941	8.85717
10468489	Xpnpep1	X-prolyl aminopeptidase (aminopeptidase P) 1, soluble	0	1.52	2.86791		12.6125	12.5824	12.585	12.5227	12.6452	11.0978	11.0409	11.0137	11.1031	11.0823
10359861	Mgst3	microsomal glutathione S-transferase 3	0	1.52	2.86791		8.24899	8.16525	8.06867	8.15515	8.15781	6.626	6.55877	6.67858	6.62384	6.71891
10524844	Taok3	TAO kinase 3	0	1.52	2.86791		8.94255	9.01486	9.11436	9.02798	9.10246	7.58546	7.3996	7.42678	7.6563	7.51499
10339787			0	1.52	2.86791		13.729	13.614	13.6375	13.6847	13.6285	12.3011	12.0265	12.0097	12.1597	12.2153
10603312	Usp27x	ubiquitin specific peptidase 27, X chromosome	0	1.52	2.86791		8.50565	8.48271	8.41289	8.65562	8.63618	6.9005	7.04069	7.16914	7.00392	6.98239
10377364	Rnf222	ring finger protein 222	0	1.52	2.86791		8.36446	8.34874	8.17002	8.27428	8.27169	6.77977	6.74173	6.57681	6.8763	6.86878
10592058	Tuba1b	tubulin, alpha 1B	0	1.52	2.86791		13.1658	13.1084	13.1439	12.9803	13.0106	11.716	11.6195	11.6062	11.4458	11.4278
10561799	Zfp74	zinc finger protein 74	0	1.52	2.86791		7.09021	7.18593	7.10462	7.13653	7.20897	5.42359	5.64427	5.80002	5.69904	5.5678
10373313	Nab2	Ngfi-A binding protein 2	0	1.52	2.86791		10.0451	10.0198	10.0498	10.1289	10.2825	8.50248	8.5216	8.55313	8.58495	8.76837
10603373	Pqbp1	polyglutamine binding protein 1	0	1.52	2.86791		9.77369	9.80345	9.69001	9.75493	9.65056	8.24957	7.95652	8.21527	8.25651	8.37212
10449152	Rab40c	Rab40c, member RAS oncogene family	0	1.52	2.86791		10.262	10.042	10.1347	10.0285	9.96988	8.61319	8.38219	8.52425	8.70868	8.60367
10376208	Gm2a	GM2 ganglioside activator protein	0	1.52	2.86791		13.3497	13.2571	13.2781	13.2471	13.2679	11.9072	11.8275	11.9198	11.5841	11.5824
10463661	Trim8	tripartite motif-containing 8	0	1.52	2.86791		8.0263	8.20796	8.09859	8.32954	7.97024	6.67773	6.60657	6.69231	6.66596	6.39804
10568417	1110007A13Rik	RIKEN cDNA 1110007A13 gene	0	1.52	2.86791		10.8044	10.8638	10.9202	10.5445	10.6672	9.32866	9.19678	9.18981	9.0912	9.37333
10342813			0	1.52	2.86791		11.9553	11.9201	12.0839	11.6167	11.8538	10.5148	10.2322	10.2839	10.3483	10.4622
10474112	Traf6	TNF receptor-associated factor 6	0	1.52	2.86791		8.5453	8.62333	8.78959	8.43661	8.48453	7.28684	6.84679	6.96801	7.11284	7.04017
10406031	Lpcat1	lysophosphatidylcholine acyltransferase 1	0	1.52	2.86791		8.28833	8.55926	8.64055	8.16153	8.26374	6.71508	6.93662	6.86164	6.86341	6.95093
10559516	Rdh13	retinol dehydrogenase 13 (all-trans and 9-cis)	0	1.52	2.86791		8.93218	8.88888	8.62426	8.58027	8.49839	7.36048	7.05557	7.13323	7.25537	7.09548
10342368			0	1.52	2.86791		12.5352	12.3167	12.4766	12.3541	12.1766	11.0546	10.7339	10.6088	10.9798	10.9023
10592535	Sorl1	sortilin-related receptor, LDLR class A repeats-containing	0	1.52	2.86791		8.7668	8.29287	8.41793	8.33684	8.56484	7.01	6.84451	6.78267	7.03855	7.09462
10371740	Ano4	anoctamin 4	0	1.52	2.86791		6.18301	6.19763	5.92929	6.23974	6.38872	4.54005	4.44988	4.77917	4.83754	4.73682
10522368	Nipal1	NIPA-like domain containing 1	0	1.52	2.86791		7.50285	7.50496	7.60543	7.36007	7.27528	5.89081	6.21269	5.97471	5.91398	5.66563
10408935			0	1.52	2.86791		7.05696	6.79215	6.73348	7.19602	6.9814	5.59992	5.35297	5.25082	5.56491	5.38614
10503186	Chd7	chromodomain helicase DNA binding protein 7	0	1.52	2.86791		8.38677	8.15289	8.08655	8.43682	8.46704	6.8939	6.48026	6.90225	6.84044	6.80308
10496302	Manba	mannosidase, beta A, lysosomal	0	1.52	2.86791		8.6951	8.83768	9.07354	8.48796	8.6772	7.37013	7.16085	7.37536	7.13071	7.14653
10601857	Ngfrap1	nerve growth factor receptor (TNFRSF16) associated protein 1	0	1.52	2.86791		9.23881	8.86546	8.9544	8.68941	9.16782	7.66845	7.37227	7.52924	7.28179	7.47718
10340983			0	1.52	2.86791		7.8736	7.73457	7.49171	7.51637	7.77904	6.2109	6.27354	6.30502	5.77672	6.24042
10338987			0	1.52	2.86791		10.916	10.6219	10.7445	10.7262	10.8813	9.23959	8.93254	9.10407	9.45523	9.56279
10565250	Mesdc1	mesoderm development candidate 1	0	1.52	2.86791		7.29613	6.97806	7.20494	7.38841	7.20593	5.64196	5.54802	5.46808	6.09041	5.74241
10543134	Ndufa4	NADH dehydrogenase (ubiquinone) 1 alpha subcomplex, 4	0	1.52	2.86791		11.0082	10.8862	10.856	11.2103	11.1129	9.46575	9.18533	9.30861	9.7942	9.74429
10460376	Ppp1ca	protein phosphatase 1, catalytic subunit, alpha isoform	0	1.52	2.86791		10.6251	10.6099	10.6254	11.0095	11.1976	9.23942	9.07658	9.07097	9.5723	9.52181
10341645			0	1.52	2.86791		9.84136	9.20301	9.48917	9.37869	9.23162	8.16999	7.46468	7.84532	8.26445	7.79284
10343633			0	1.52	2.86791		9.71775	9.48141	9.53944	10.0831	9.97597	7.83098	7.97397	8.07411	8.86682	8.47404
10582337			0	1.52	2.86791		7.06826	7.88045	7.9631	7.32914	8.15122	5.83532	6.37708	6.14523	6.12032	6.31613
10501358	Sars	seryl-aminoacyl-tRNA synthetase	0	1.51	2.8481		11.0763	10.9248	10.9753	11.0096	10.8775	9.45923	9.3774	9.38773	9.55932	9.5258
10546402	Zfyve20	zinc finger, FYVE domain containing 20	0	1.51	2.8481		9.49333	9.45237	9.41809	9.52889	9.55583	7.95727	7.88379	7.91797	7.96327	8.15705
10403765	Vps41	vacuolar protein sorting 41 (yeast)	0	1.51	2.8481		11.0925	11.0496	11.1078	10.9042	10.9884	9.70062	9.49861	9.46263	9.50865	9.44362
10368025	Hspa8	heat shock protein 8	0	1.51	2.8481		13.0664	13.0507	13.0255	13.0405	13.0889	11.6185	11.3211	11.4734	11.6512	11.6825
10413897	Ercc6	excision repair cross-complementing rodent repair deficiency, complementation group 6	0	1.51	2.8481		9.8054	10.0406	10.0384	9.70201	10.0221	8.38087	8.37111	8.45043	8.38915	8.47995
10344402			0	1.51	2.8481		12.1248	11.8672	11.9398	11.8929	11.7554	10.5739	10.3925	10.3302	10.3271	10.3862
10364130	Zfp280b	zinc finger protein 280B	0	1.51	2.8481		10.1977	10.0695	9.9869	9.88995	10.1392	8.51846	8.35038	8.58182	8.59205	8.69405
10601044	Gdpd2	glycerophosphodiester phosphodiesterase domain containing 2	0	1.51	2.8481		7.68792	7.66426	7.39534	7.64278	7.45064	6.04863	6.13297	6.19355	5.87404	6.06665
10551777	Zfp790	zinc finger protein 790	0	1.51	2.8481		8.05241	8.04283	7.99957	8.07183	8.23935	6.64431	6.37914	6.61391	6.76744	6.43834
10340969			0	1.51	2.8481		11.5942	11.6994	11.6431	11.5364	11.6498	10.0732	9.97294	9.96552	10.1995	10.3761
10368011	Vta1	Vps20-associated 1 homolog (S. cerevisiae)	0	1.51	2.8481		9.92251	9.83464	9.92886	10.1455	10.2413	8.5102	8.36262	8.40281	8.69908	8.56372
10602592	Hsd17b10	hydroxysteroid (17-beta) dehydrogenase 10	0	1.51	2.8481		10.4874	10.5784	10.5653	10.1216	10.2375	9.01442	8.66419	8.81079	8.99408	8.93315
10351616	Usf1	upstream transcription factor 1	0	1.51	2.8481		8.73444	8.80693	8.87575	8.8538	8.92296	7.28128	7.07766	7.18686	7.39092	7.71814
10342499			0	1.51	2.8481		11.5294	11.4666	11.4996	11.7989	11.6752	10.2595	10.0078	9.76956	10.311	10.0519
10549382	Gm5887	predicted gene 5887	0	1.51	2.8481		8.12211	7.88419	7.79361	7.50683	7.92193	6.39338	6.50346	6.16711	6.38228	6.22047
10430201	Myh9	myosin, heavy polypeptide 9, non-muscle	0	1.51	2.8481		9.11783	9.00043	9.01897	8.69611	8.59495	7.35758	7.07766	7.30568	7.51442	7.63205
10432298			0	1.51	2.8481		9.1968	8.91516	9.05769	9.8104	9.65846	7.65662	7.58062	7.46436	8.12868	8.24723
10390271	Nfe2l1	nuclear factor, erythroid derived 2,-like 1	0	1.5	2.82843		10.661	10.5644	10.6855	10.6881	10.7117	9.25413	9.13298	9.08813	9.08604	9.23315
10460359	Coro1b	coronin, actin binding protein 1B	0	1.5	2.82843		11.871	11.9063	11.9039	11.7938	11.8744	10.2487	10.3309	10.3747	10.3876	10.4921
10343402			0	1.5	2.82843		11.8029	11.7252	11.8363	11.6232	11.5953	10.1832	10.2128	10.3083	10.1769	10.1825
10438262	Slc25a1	solute carrier family 25 (mitochondrial carrier, citrate transporter), member 1	0	1.5	2.82843		11.5494	11.4725	11.5345	11.3224	11.3563	10.0455	9.93205	9.97722	9.90026	9.88948
10491721	Spry1	sprouty homolog 1 (Drosophila)	0	1.5	2.82843		8.33627	8.30425	8.29328	8.26668	8.32189	6.82627	6.83596	6.68517	6.68995	6.99104
10419370	Exoc5	exocyst complex component 5	0	1.5	2.82843		10.3779	10.1844	10.3143	10.2187	10.34	8.87702	8.66551	8.75488	8.74523	8.91316
10391837	Plcd3	phospholipase C, delta 3	0	1.5	2.82843		8.48929	8.61488	8.60646	8.56371	8.6399	6.98265	7.26387	6.95157	7.09822	7.11828
10415844	Ctsb	cathepsin B	0	1.5	2.82843		11.0959	11.0463	10.973	10.8016	10.8705	9.60125	9.34964	9.44284	9.49151	9.38425
10390227	Ube2z	ubiquitin-conjugating enzyme E2Z (putative)	0	1.5	2.82843		11.116	11.0634	11.0061	10.7968	10.9817	9.6487	9.48653	9.47802	9.33166	9.50762
10530832	2610024G14Rik	RIKEN cDNA 2610024G14 gene	0	1.5	2.82843		9.18238	9.28794	8.93574	9.29692	9.13498	7.71647	7.57235	7.58712	7.7416	7.7355
10477073	Csnk2a1	casein kinase 2, alpha 1 polypeptide	0	1.5	2.82843		10.9373	10.9706	10.9869	10.6764	10.6617	9.43664	9.24947	9.29178	9.38356	9.34915
10480541	Ehmt1	euchromatic histone methyltransferase 1	0	1.5	2.82843		8.6828	8.72326	8.64307	8.52688	8.75478	7.13057	6.9304	7.11386	7.3066	7.3273
10368060			0	1.5	2.82843		5.38844	5.21692	5.67392	5.31801	5.53783	3.94689	4.05638	3.90612	3.84578	3.90376
10361358	Rgs17	regulator of G-protein signaling 17	0	1.5	2.82843		7.56196	7.73933	7.60037	7.45094	7.55895	5.87693	6.10886	6.26017	5.90801	6.27025
10605370	Mpp1	membrane protein, palmitoylated	0	1.5	2.82843		7.52898	7.36293	7.58357	7.12106	7.28022	5.95194	6.03358	5.83963	5.79689	5.76164
10404941	Kdm1b	lysine (K)-specific demethylase 1B	0	1.5	2.82843		8.57409	8.59814	8.28669	8.59571	8.59725	7.13182	6.9981	6.73355	7.12389	7.16475
10508707			0	1.5	2.82843		9.74951	9.82656	9.9127	9.52499	9.88161	8.26389	8.47576	8.41436	8.15986	8.08125
10342098			0	1.5	2.82843		11.6175	11.409	11.5932	11.1411	11.184	10.0265	9.99673	9.74728	9.75703	9.93053
10338163			0	1.5	2.82843		10.465	10.3199	10.3728	10.0273	10.0364	8.8252	8.608	8.57584	8.98603	8.72009
10603316	2010204K13Rik	RIKEN cDNA 2010204K13 gene	0	1.5	2.82843		7.71365	7.64554	7.51896	7.58253	7.20924	5.9137	5.91264	5.89281	6.32599	6.12055
10543544	Lrrc4	leucine rich repeat containing 4	0	1.5	2.82843		7.64602	7.63215	7.4124	7.99754	7.95602	6.14226	6.08854	6.3182	6.22634	6.37181
10515712	Szt2	seizure threshold 2	0	1.5	2.82843		7.68399	7.57294	7.79728	7.90878	7.80888	6.07672	6.34115	5.91435	6.41248	6.51401
10485643	AI314831	expressed sequence AI314831	0	1.5	2.82843		7.50545	7.73899	7.83689	7.48697	7.77004	5.82534	6.21266	6.31663	6.01286	6.46435
10341375			0	1.5	2.82843		9.86956	9.82332	9.86584	9.50696	9.84541	8.23451	7.91999	8.35391	8.28146	8.63541
10516325	Adprhl2	ADP-ribosylhydrolase like 2	0	1.5	2.82843		8.78269	8.46484	9.0266	8.24985	8.56359	7.19858	7.03797	7.1218	7.03018	7.20084
10343345			0	1.5	2.82843		10.6161	10.7155	10.4915	11.2322	10.941	9.34224	9.2255	8.99496	9.6203	9.31364
10340943			0	1.5	2.82843		10.0747	10.0871	9.67605	9.89862	9.67227	8.11322	8.56891	8.41518	7.98527	8.80908
10342723			0	1.49	2.80889		12.8189	12.8415	12.7782	12.7798	12.7792	11.2773	11.2276	11.3232	11.3075	11.4326
10532753	Coro1c	coronin, actin binding protein 1C	0	1.49	2.80889		10.9111	10.7704	10.855	10.8675	10.8706	9.35699	9.27153	9.3236	9.40998	9.4463
10421456	Xpo7	exportin 7	0	1.49	2.80889		10.6014	10.4384	10.4043	10.5505	10.4199	9.0056	8.92179	8.94056	9.04948	9.06532
10498519	Ssr3	signal sequence receptor, gamma	0	1.49	2.80889		11.2178	11.1901	11.1449	11.1524	11.254	9.79538	9.59498	9.53129	9.77634	9.81304
10571274	Gsr	glutathione reductase	0	1.49	2.80889		10.4895	10.5418	10.568	10.3059	10.3046	9.04253	8.88359	8.97459	8.96712	8.86742
10426650	Tuba1c	tubulin, alpha 1C	0	1.49	2.80889		13.0582	13.0563	13.0707	12.9016	12.9367	11.6268	11.565	11.6167	11.4086	11.3564
10502510	Lmo4	LIM domain only 4	0	1.49	2.80889		9.55778	9.5283	9.52488	9.65205	9.78288	8.16261	8.08463	7.96836	8.21687	8.18663
10361007	Smyd2	SET and MYND domain containing 2	0	1.49	2.80889		9.67477	9.67978	9.6747	9.36411	9.57312	8.13721	8.22921	8.04182	8.05775	8.0462
10388996	Crlf3	cytokine receptor-like factor 3	0	1.49	2.80889		10.0391	10.0926	10.2358	9.85287	10.0695	8.63978	8.45516	8.51964	8.55179	8.65377
10394093	BC017643	cDNA sequence BC017643	0	1.49	2.80889		8.91337	9.08402	8.75833	8.83357	9.03241	7.50566	7.42668	7.51227	7.44179	7.29219
10497663	Slc7a14	solute carrier family 7 (cationic amino acid transporter, y+ system), member 14	0	1.49	2.80889		7.75795	7.55649	7.61164	7.65471	7.37402	6.1668	6.02191	6.00733	6.17564	6.11508
10433034	Atf7	activating transcription factor 7	0	1.49	2.80889		10.6526	10.5418	10.543	10.6575	10.6017	9.07262	8.96404	8.93529	9.25864	9.3142
10355464	Pecr	peroxisomal trans-2-enoyl-CoA reductase	0	1.49	2.80889		7.66067	7.56662	7.45061	7.58568	7.24293	6.01701	5.86318	5.93268	6.14066	6.09741
10582649	Pgbd5	piggyBac transposable element derived 5	0	1.49	2.80889		9.62872	9.35705	9.34764	9.42066	9.43778	8.22812	7.95223	7.85914	7.80921	7.90842
10524882	Wsb2	WD repeat and SOCS box-containing 2	0	1.49	2.80889		11.4477	11.1897	11.285	11.5056	11.3908	9.98537	9.62023	9.82062	10.0354	9.88587
10605674	Pola1	polymerase (DNA directed), alpha 1	0	1.49	2.80889		7.39629	7.43773	7.55114	7.45323	7.5993	6.03672	5.72398	5.88601	6.1761	6.18324
10596200	Tmem108	transmembrane protein 108	0	1.49	2.80889		8.68453	8.39015	8.60596	8.78471	8.64855	7.09861	7.31426	7.18075	7.18585	6.8644
10507286	Ipp	IAP promoted placental gene	0	1.49	2.80889		10.3865	10.1731	10.2244	9.84558	9.90863	8.61632	8.6045	8.64865	8.61656	8.5977
10515731	Szt2	seizure threshold 2	0	1.49	2.80889		8.21013	7.81165	8.07684	8.18867	8.00514	6.53123	6.65061	6.29149	6.77314	6.58368
10338773			0	1.49	2.80889		10.3764	10.4814	10.3792	10.4214	10.6397	8.75725	8.86086	8.92419	8.89483	9.38897
10432473	Nckap5l	NCK-associated protein 5-like	0	1.49	2.80889		8.18129	8.11129	8.27153	8.54881	8.37991	6.84549	6.91426	7.07485	6.67272	6.5341
10530841	Igfbp7	insulin-like growth factor binding protein 7	0	1.49	2.80889		11.6706	11.753	11.6012	11.1839	11.0958	10.1052	9.94539	9.89429	10.0546	9.86348
10451613	Foxp4	forkhead box P4	0	1.49	2.80889		8.20429	7.82027	7.97774	8.45565	8.69863	6.77892	6.58226	6.7712	6.78993	6.80588
10338541			0	1.49	2.80889		7.58116	8.2979	7.94201	7.33184	7.56688	5.86096	6.32499	6.58584	6.43953	6.04768
10350015	Adipor1	adiponectin receptor 1	0	1.48	2.78949		11.7458	11.6107	11.7109	11.8457	11.7881	10.2701	10.2252	10.2079	10.3524	10.2681
10341637			0	1.48	2.78949		13.6454	13.6148	13.581	13.6434	13.6638	12.195	12.0609	12.0155	12.2683	12.1856
10559504	Leng9	leukocyte receptor cluster (LRC) member 9	0	1.48	2.78949		8.21389	8.1356	8.24394	8.08114	8.20734	6.8322	6.74072	6.67578	6.65695	6.57413
10569611	Fadd	Fas (TNFRSF6)-associated via death domain	0	1.48	2.78949		8.48446	8.36535	8.39225	8.23458	8.36832	7.01262	6.79154	6.88463	6.9387	6.83214
10547701	Pex5	peroxisomal biogenesis factor 5	0	1.48	2.78949		10.6757	10.5539	10.4888	10.4021	10.5224	9.15789	8.97837	8.96767	9.01322	9.12101
10338764			0	1.48	2.78949		8.3329	8.11462	8.16887	8.26628	8.14725	6.67141	6.78255	6.81109	6.80953	6.57759
10515352	Akr1a4	aldo-keto reductase family 1, member A4 (aldehyde reductase)	0	1.48	2.78949		12.2949	12.1892	12.1818	12.1268	12.0191	10.7965	10.5424	10.7861	10.6272	10.6479
10485198	Tspan18	tetraspanin 18	0	1.48	2.78949		7.91796	7.76012	7.77425	7.81543	7.86735	6.50423	6.24379	6.17573	6.29603	6.49418
10342314			0	1.48	2.78949		12.369	12.1298	12.3135	12.2686	12.1941	10.8048	10.6427	10.6109	10.8413	10.9513
10537292	1810058I24Rik	RIKEN cDNA 1810058I24 gene	0	1.48	2.78949		10.8142	10.6024	10.6225	10.3385	10.5784	9.18646	9.09101	9.09566	9.10963	9.07187
10360058	Tomm40l	translocase of outer mitochondrial membrane 40 homolog-like (yeast)	0	1.48	2.78949		8.71259	8.53263	8.77728	8.50543	8.5778	7.30137	6.99272	7.20482	7.19839	7.00382
10421810	1190002H23Rik	RIKEN cDNA 1190002H23 gene	0	1.48	2.78949		9.81102	9.95071	9.92223	9.72417	9.60748	8.28251	8.13959	8.42194	8.42258	8.34406
10502240	Npnt	nephronectin	0	1.48	2.78949		7.84809	7.86373	7.68046	7.84286	7.46708	6.20379	6.17733	6.3045	6.35449	6.27776
10397364	Mfsd7c	major facilitator superfamily domain containing 7C	0	1.48	2.78949		11.666	11.5503	11.5167	11.8955	11.8089	10.1387	10.2129	10.0839	10.2471	10.3484
10580183	Ier2	immediate early response 2	0	1.48	2.78949		8.17816	7.88026	7.85151	7.78735	7.94182	6.47213	6.53966	6.30172	6.31894	6.5915
10341062			0	1.48	2.78949		11.284	10.9074	10.9582	10.9373	10.8746	9.65025	9.4751	9.40141	9.60562	9.4388
10368762	Cdc40	cell division cycle 40 homolog (yeast)	0	1.48	2.78949		10.2491	10.2263	10.176	9.84807	10.0883	8.82352	8.61381	8.54451	8.53911	8.66156
10509777	Iffo2	intermediate filament family orphan 2	0	1.48	2.78949		7.76322	7.86755	7.702	7.61726	7.62856	6.32	5.92683	6.24779	6.36683	6.31756
10543448	Wasl	Wiskott-Aldrich syndrome-like (human)	0	1.48	2.78949		9.21164	8.88632	8.97796	9.18331	9.0297	7.62795	7.41642	7.40974	7.74811	7.67706
10452118	Lonp1	lon peptidase 1, mitochondrial	0	1.48	2.78949		9.51932	9.55922	9.47605	9.63552	9.67665	8.17284	7.73264	8.0964	8.25112	8.19416
10524703	Pxn	paxillin	0	1.48	2.78949		11.0977	10.9198	10.9184	11.1638	11.0612	9.6932	9.4333	9.28836	9.79211	9.56464
10350102	Ptpn7	protein tyrosine phosphatase, non-receptor type 7	0	1.48	2.78949		8.09444	8.2275	8.08456	7.86463	8.33865	6.63293	6.71808	6.50198	6.47693	6.86142
10422776	Phb	prohibitin	0	1.48	2.78949		10.4267	10.3539	10.4411	10.5087	10.5973	8.93697	8.73216	8.81001	9.20811	9.238
10512022			0	1.48	2.78949		6.65646	6.66888	6.5421	6.41816	6.27527	5.1799	5.14688	5.11739	5.03294	4.67959
10571233	Fut10	fucosyltransferase 10	0	1.48	2.78949		8.1818	7.92054	7.99679	7.92541	7.64767	6.68971	6.11507	6.48906	6.4667	6.50412
10584762	Bcl9l	B-cell CLL/lymphoma 9-like	0	1.48	2.78949		8.62164	8.28698	8.40749	8.9848	8.93172	7.05288	7.19623	7.08812	7.28032	7.21372
10339224			0	1.48	2.78949		9.49252	9.35137	8.95786	9.27438	9.24485	7.69139	7.81706	7.28322	7.60523	8.52144
10603478	Tbc1d25	TBC1 domain family, member 25	0	1.47	2.77022		9.9599	9.96489	10.0132	10.0008	10.0225	8.43411	8.65662	8.45088	8.51785	8.5673
10447938	Dact2	dapper homolog 2, antagonist of beta-catenin (xenopus)	0	1.47	2.77022		9.18433	8.99536	9.21301	9.05122	9.18861	7.56961	7.72905	7.70426	7.6605	7.59744
10578207	Lonrf1	LON peptidase N-terminal domain and ring finger 1	0	1.47	2.77022		8.13661	8.0846	7.96685	8.01396	7.98787	6.53293	6.56419	6.71216	6.44007	6.58386
10503178	Chd7	chromodomain helicase DNA binding protein 7	0	1.47	2.77022		8.70507	8.59586	8.49772	8.3542	8.56895	7.09179	7.08044	7.09287	7.07389	7.05023
10419343	Atg14	VATG14 autophagy related 14 homolog (S. cerevisiae)	0	1.47	2.77022		9.24377	9.13317	9.3621	9.31914	9.46147	7.80657	7.73442	7.78703	7.91251	7.93072
10450796	Armcx5	armadillo repeat containing, X-linked 5	0	1.47	2.77022		5.80805	5.99771	5.85438	5.74531	5.75531	4.51944	4.39759	4.38062	4.3289	4.20457
10386934	Wsb2	WD repeat and SOCS box-containing 2	0	1.47	2.77022		10.3643	10.0922	10.1337	10.461	10.2133	8.94484	8.62979	8.71546	8.84361	8.78823
10509820	Rcc2	regulator of chromosome condensation 2	0	1.47	2.77022		11.7136	11.762	11.7634	11.4349	11.639	10.1808	10.3105	10.36	9.9537	10.1542
10575052	Cdh1	cadherin 1	0	1.47	2.77022		7.74393	7.89725	7.9973	7.59576	7.72325	6.55077	6.1793	6.17701	6.38157	6.33854
10379820	Acaca	acetyl-Coenzyme A carboxylase alpha	0	1.47	2.77022		10.0696	9.96385	10.1124	9.80241	10.0814	8.63932	8.42423	8.23725	8.73931	8.62134
10600504	Fundc2	FUN14 domain containing 2	0	1.47	2.77022		7.24349	7.13746	7.00891	7.34274	7.4652	5.81214	5.64982	5.67409	6.03527	5.68102
10593723	Acsbg1	acyl-CoA synthetase bubblegum family member 1	0	1.47	2.77022		12.7995	12.6401	12.6343	12.4578	12.5184	11.4684	10.9442	10.9955	11.1044	11.1733
10340720			0	1.47	2.77022		11.3059	11.2735	11.2151	11.5814	11.4733	9.81957	9.65788	9.77946	10.1169	10.1303
10441400	Arid1b	AT rich interactive domain 1B (SWI-like)	0	1.47	2.77022		9.21182	9.13348	8.96956	9.27146	9.33297	7.906	7.46872	7.43905	7.93736	7.82331
10602090	Atg4a	autophagy-related 4A (yeast)	0	1.47	2.77022		8.34878	8.24017	8.09524	8.29716	8.47955	7.09342	6.85872	6.44637	7.04462	6.6789
10600301	Ssr4	signal sequence receptor, delta	0	1.47	2.77022		9.73301	9.84726	9.72514	9.31314	9.24742	8.22061	7.88633	8.22336	8.13931	8.05022
[truncated: 1,368 more rows]
