# Supplementary material for: RiboTag Analysis of Actively Translated mRNAs in Sertoli and Leydig Cells In Vivo
Source: PLoS One. 2013 Jun 11;8(6):e66179. doi: 10.1371/journal.pone.0066179 (PMC3679032; doi:10.1371/journal.pone.0066179)
Supplement: Dataset S2 — Leydig cell enriched genes. Transcripts that show a fold change >2 when comparing the signal in the IP to their respective inputs (enrichment) by microarray analysis in Saline-treated Cyp17iCre: RiboTag mice (n = 3) are listed. Statistical analysis was performed using One-way Analysis of Variance (ANOVA, p<0.05). (XLSX) [file pone.0066179.s017.xlsx]

## Sheet: IP vs I Cyp17iCre RiboTag
Cyp17iCre:RiboTag IP vs Input
Genes represent those in the IP that are 2 fold greater than input and pass ANOVA with FDR with p<0.05
Probe	Symbol	Description	p-value	Fold Change (log)	Fold Change (linear)		IP_1	IP_2	IP_3	Input_1	Input_2	Input_3
10552594	Klk1b22	kallikrein 1-related peptidase b22	0	3.9	14.9285		10.9396	10.4934	10.0741	7.15258	6.26429	6.38556
10480003	Itih2	inter-alpha trypsin inhibitor, heavy chain 2	0	3.85	14.42		11.9424	12.1332	11.9079	8.11787	8.20585	8.11016
10401068	Spnb1	spectrin beta 1	0	3.78	13.737		11.5671	11.0935	11.2908	7.61462	7.50691	7.47756
10580635	Ces3	carboxylesterase 3	0	3.77	13.6422		12.3447	12.4046	12.3039	8.55947	8.51688	8.66929
10453487	Lhcgr	luteinizing hormone/choriogonadotropin receptor	0	3.76	13.5479		11.6111	11.4067	11.305	7.82369	7.73262	7.49801
10434698	Fetub	fetuin beta	0	3.62	12.295		11.1413	11.2104	11.1887	7.52027	7.58297	7.56602
10542993	Pon3	paraoxonase 3	0	3.62	12.295		11.2829	11.3759	11.327	7.81217	7.77735	7.53866
10402435	Serpina3c	serine (or cysteine) peptidase inhibitor, clade A, member 3C	0	3.6	12.1257		12.2331	12.2196	12.1327	8.6981	8.59213	8.49669
10451953	Lrg1	leucine-rich alpha-2-glycoprotein 1	0	3.55	11.7127		9.94319	9.97766	9.94458	6.55288	6.46449	6.2038
10408557	Serpinb1a	serine (or cysteine) peptidase inhibitor, clade B, member 1a	0	3.55	11.7127		10.177	10.2023	10.2078	6.61302	6.73987	6.58461
10379153	Aldoc	aldolase C, fructose-bisphosphate	0	3.54	11.6318		11.7606	11.7604	11.6771	8.17509	8.18127	8.21863
10469581	Etl4	enhancer trap locus 4	0	3.53	11.5514		11.3755	11.6331	11.5257	7.93155	8.08771	7.93298
10552604	Klk1b24	kallikrein 1-related peptidase b24	0	3.53	11.5514		11.684	11.5424	11.2102	8.40028	7.87385	7.5869
10560618	Apoc1	apolipoprotein C-I	0	3.51	11.3924		11.6521	11.6444	11.5378	8.28537	8.1581	7.86055
10477512	BC018465	cDNA sequence BC018465	0	3.51	11.3924		11.7703	11.6947	11.6391	8.29488	8.01531	8.25009
10450344	C2	complement component 2 (within H-2S)	0	3.51	11.3924		11.6594	11.6113	11.5957	8.13816	8.10022	8.10471
10556509	Spon1	spondin 1, (f-spondin) extracellular matrix protein	0	3.49	11.2356		11.5579	11.5503	11.4229	8.15982	8.02761	7.87629
10349694	Pm20d1	peptidase M20 domain containing 1	0	3.45	10.9283		9.38251	9.37322	9.27149	5.90939	5.84335	5.93074
10587733	Ctsh	cathepsin H	0	3.44	10.8528		10.8121	10.8005	10.7185	7.36238	7.34452	7.29768
10466624	Aldh1a7	aldehyde dehydrogenase family 1, subfamily A7	0	3.43	10.7779		12.1988	12.099	12.1985	8.72954	8.66143	8.81944
10540034	Aldh1l1	aldehyde dehydrogenase 1 family, member L1	0	3.42	10.7034		12.1509	12.1604	12.1359	8.79411	8.68778	8.71496
10383799	Tcn2	transcobalamin 2	0	3.42	10.7034		11.9754	12.13	11.932	8.7133	8.68282	8.38974
10344725	Adhfe1	alcohol dehydrogenase, iron containing, 1	0	3.41	10.6295		10.8327	10.8711	10.8651	7.42858	7.38231	7.52709
10499329	Rhbg	Rhesus blood group-associated B glycoprotein	0	3.41	10.6295		11.1705	10.5121	11.0584	7.71423	7.24033	7.55767
10599927	Aff2	AF4/FMR2 family, member 2	0	3.4	10.5561		9.70825	10.1104	9.72785	6.39834	6.53518	6.40923
10514510	Cyp2j6	cytochrome P450, family 2, subfamily j, polypeptide 6	0	3.39	10.4831		8.62336	8.62905	8.7851	5.45486	5.09058	5.31636
10581538	Nqo1	NAD(P)H dehydrogenase, quinone 1	0	3.39	10.4831		9.40286	9.47372	9.60679	6.30494	5.95937	6.0553
10467979	Scd1	stearoyl-Coenzyme A desaturase 1	0	3.39	10.4831		11.7635	11.6328	11.782	8.45431	8.36679	8.18815
10390032	Acsf2	acyl-CoA synthetase family member 2	0	3.37	10.3388		10.8648	11.0852	10.9946	7.68873	7.47396	7.66876
10496438	Adh1	alcohol dehydrogenase 1 (class I)	0	3.37	10.3388		12.4681	12.5265	12.5214	9.00043	9.1146	9.29275
10501555	Amy1	amylase 1, salivary	0	3.37	10.3388		12.4544	12.5852	12.3038	9.20811	9.02521	9.01209
10423030	Prlr	prolactin receptor	0	3.37	10.3388		11.7317	11.788	11.6958	8.49953	8.35608	8.25596
10492426	Acsf2	acyl-CoA synthetase family member 2	0	3.36	10.2674		10.8718	11.0581	10.9778	7.68954	7.44621	7.67843
10437552	AU021092	expressed sequence AU021092	0	3.36	10.2674		12.1522	11.5905	11.7781	8.75557	8.42036	8.27492
10573626	Gpt2	glutamic pyruvate transaminase (alanine aminotransferase) 2	0	3.36	10.2674		12.4458	12.2927	12.4905	9.24631	8.8702	9.04005
10423049	Prlr	prolactin receptor	0	3.36	10.2674		11.2422	11.2995	11.3052	8.09234	7.92168	7.74516
10603099	Figf	c-fos induced growth factor	0	3.34	10.1261		10.9235	10.9361	10.7251	7.64517	7.24782	7.66907
10528207	Cd36	CD36 antigen	0	3.33	10.0561		12.5064	12.5372	12.412	9.32061	9.13583	9.00562
10591884	Glb1l2	galactosidase, beta 1-like 2	0	3.33	10.0561		10.452	10.4382	10.3385	7.14565	7.14106	6.94273
10459772	Lipg	lipase, endothelial	0	3.32	9.98664		11.9503	11.8725	11.8904	8.67513	8.50241	8.56604
10431874	Slc38a1	solute carrier family 38, member 1	0	3.32	9.98664		9.65367	9.44691	10.1239	6.43523	5.91215	6.90397
10366446	Tspan8	tetraspanin 8	0	3.32	9.98664		10.247	10.4757	10.4407	7.08637	7.04032	7.08928
10488409	9230104L09Rik	RIKEN cDNA 9230104L09 gene	0	3.31	9.91766		12.4044	12.5468	12.2034	9.29847	9.0961	8.83678
10376765	Aldh3a1	aldehyde dehydrogenase family 3, subfamily A1	0	3.31	9.91766		10.8378	10.3395	10.5957	7.41442	7.12664	7.3076
10367600	Esr1	estrogen receptor 1 (alpha)	0	3.3	9.84916		10.8754	10.9498	10.8937	7.54319	7.66287	7.60775
10481186	Sardh	sarcosine dehydrogenase	0	3.3	9.84916		10.855	10.9035	10.6753	7.50277	7.55594	7.46247
10469046	Phyh	phytanoyl-CoA hydroxylase	0	3.29	9.78112		11.0038	11.0807	11.0475	7.90829	7.79618	7.56151
10413542	Tkt	transketolase	0	3.28	9.71356		11.451	11.4191	11.4042	8.19665	8.07059	8.17585
10537712	Gstk1	glutathione S-transferase kappa 1	0	3.27	9.64646		11.8697	11.8009	11.8367	8.76628	8.51439	8.41098
10556769	Acsm3	acyl-CoA synthetase medium-chain family member 3	0	3.24	9.44794		8.72842	8.78419	8.83988	5.77499	5.4422	5.41566
10485466	Cat	catalase	0	3.22	9.31787		11.2203	11.2056	11.2385	8.07744	8.04258	7.8765
10380699	Copz2	coatomer protein complex, subunit zeta 2	0	3.21	9.25351		11.1771	11.1426	10.9674	8.11221	7.58964	7.96105
10440002	Gpr128	G protein-coupled receptor 128	0	3.21	9.25351		9.94833	9.93483	10.1813	6.84088	6.61496	6.96735
10571054	Star	steroidogenic acute regulatory protein	0	3.21	9.25351		12.4978	12.7514	12.6883	9.23404	9.65463	9.41063
10541683	C1rb	complement component 1, r subcomponent B	0	3.2	9.18959		10.4759	10.7594	10.5652	7.35823	7.34826	7.48735
10363541	Ass1	argininosuccinate synthetase 1	0	3.19	9.12611		12.9981	12.886	12.9802	9.93463	9.49317	9.8811
10569113	Cdhr5	cadherin-related family member 5	0	3.19	9.12611		9.46314	9.55221	9.68959	6.44471	6.19289	6.48547
10485117	Creb3l1	cAMP responsive element binding protein 3-like 1	0	3.17	9.00047		10.2512	10.4764	10.2215	7.22205	6.96504	7.24509
10418341	Il17rb	interleukin 17 receptor B	0	3.17	9.00047		10.2352	10.3068	10.2662	7.06012	7.1065	7.13959
10552587	Klk1b21	kallikrein 1-related peptidase b21	0	3.17	9.00047		12.2973	12.1396	11.8363	9.31852	8.80323	8.64766
10538150	Tmem176a	transmembrane protein 176A	0	3.17	9.00047		11.4365	11.5679	11.5078	8.289	8.32313	8.38052
10456699	Acaa2	acetyl-Coenzyme A acyltransferase 2 (mitochondrial 3-oxoacyl-Coenzyme A thiolase)	0	3.16	8.9383		12.1231	12.1202	12.1746	8.9822	8.93925	9.02902
10471154	Ass1	argininosuccinate synthetase 1	0	3.16	8.9383		12.8206	12.7288	12.8112	9.79948	9.34051	9.74121
10372208	Acss3	acyl-CoA synthetase short-chain family member 3	0	3.15	8.87656		10.2077	10.2783	10.1731	6.97314	7.20214	7.03309
10576581	Kcnk1	potassium channel, subfamily K, member 1	0	3.15	8.87656		11.1261	11.2605	11.2809	8.19579	7.9355	8.08002
10410065	Hsd17b3	hydroxysteroid (17-beta) dehydrogenase 3	0	3.14	8.81524		12.6427	12.5112	12.4491	9.74467	9.27946	9.14648
10419578	Ndrg2	N-myc downstream regulated gene 2	0	3.14	8.81524		12.1274	12.0803	12.0076	8.98322	8.93834	8.86376
10539143	Retsat	retinol saturase (all trans retinol 13,14 reductase)	0	3.14	8.81524		11.4921	11.2794	11.3519	8.38214	8.09095	8.22323
10393573	Lgals3bp	lectin, galactoside-binding, soluble, 3 binding protein	0	3.13	8.75435		11.0308	11.2084	11.0983	7.90352	7.976	8.0607
10436978	Cbr3	carbonyl reductase 3	0	3.11	8.63383		9.08149	9.44314	9.57022	6.33493	6.32346	6.11617
10603746	Maob	monoamine oxidase B	0	3.11	8.63383		9.77772	9.82793	9.66984	6.65349	6.69653	6.58705
10419854	Slc7a8	solute carrier family 7 (cationic amino acid transporter, y+ system), member 8	0	3.11	8.63383		12.6935	12.828	12.6441	9.75096	9.50612	9.59243
10601701	Tmem35	transmembrane protein 35	0	3.11	8.63383		11.6764	11.6595	11.6521	8.75092	8.30756	8.59736
10501608	Vcam1	vascular cell adhesion molecule 1	0	3.11	8.63383		12.8604	12.9804	12.7903	9.95572	9.83727	9.51385
10423505	Cmbl	carboxymethylenebutenolidase-like (Pseudomonas)	0	3.1	8.57419		11.1255	11.2662	11.2389	8.04898	8.18681	8.10603
10558150	Htra1	HtrA serine peptidase 1	0	3.1	8.57419		10.7111	10.6546	10.545	7.52792	7.55331	7.53248
10396936	Smoc1	SPARC related modular calcium binding 1	0	3.09	8.51496		10.7736	10.8995	10.815	7.73993	7.7394	7.74484
10423002	Ugt3a1	UDP glycosyltransferases 3 family, polypeptide A1	0	3.08	8.45614		8.68176	8.64019	8.51299	5.38766	5.64143	5.5756
10498584			0	3.08	8.45614		10.6815	10.5165	10.6641	7.80833	7.49527	7.33091
10355246	Acadl	acyl-Coenzyme A dehydrogenase, long-chain	0	3.07	8.39773		11.7774	11.7881	11.8177	8.82993	8.64569	8.70762
10545958	Anxa4	annexin A4	0	3.07	8.39773		10.456	10.4505	10.507	7.5119	7.44193	7.26131
10596053	Pccb	propionyl Coenzyme A carboxylase, beta polypeptide	0	3.07	8.39773		11.4191	11.336	11.4422	8.27746	8.3989	8.3035
10406270	Glrx	glutaredoxin	0	3.06	8.33973		9.56195	9.52402	9.49185	6.57707	6.27223	6.55713
10552581	Klk1b27	kallikrein 1-related peptidase b27	0	3.06	8.33973		10.376	9.49051	9.28924	7.01044	6.68261	6.29486
10542470	Mgst1	microsomal glutathione S-transferase 1	0	3.06	8.33973		12.056	12.0893	12.1097	9.01731	8.89823	9.16925
10532085	Tgfbr3	transforming growth factor, beta receptor III	0	3.06	8.33973		11.5405	11.5778	11.3263	8.4685	8.38095	8.41991
10500565	Hsd3b1	hydroxy-delta-5-steroid dehydrogenase, 3 beta- and steroid delta-isomerase 1	0	3.05	8.28212		10.3275	10.6026	10.3772	7.34168	7.56718	7.24286
10417027	Cldn10a	claudin 10A	0	3.04	8.22491		10.1679	10.0517	10.0584	7.1854	6.96645	7.00528
10522530	Kit	kit oncogene	0	3.04	8.22491		11.9239	11.9004	11.8309	9.01324	8.73028	8.80532
10502951	Acadm	acyl-Coenzyme A dehydrogenase, medium chain	0	3.03	8.1681		11.8626	11.8635	11.8628	8.6987	8.75552	9.046
10543017	Pdk4	pyruvate dehydrogenase kinase, isoenzyme 4	0	3.03	8.1681		9.04186	8.88469	9.07127	5.97993	5.74312	6.19015
10582649	Pgbd5	piggyBac transposable element derived 5	0	3.03	8.1681		11.2754	11.6324	11.3642	8.45864	8.38719	8.34903
10516956	Smpdl3b	sphingomyelin phosphodiesterase, acid-like 3B	0	3.03	8.1681		10.5969	10.3999	10.5238	7.57088	7.45593	7.40298
10568363	Armcx3	armadillo repeat containing, X-linked 3	0	3.02	8.11168		10.2933	10.6582	10.5216	7.32377	7.53771	7.55681
10450272	Cyp21a1	cytochrome P450, family 21, subfamily a, polypeptide 1	0	3.02	8.11168		9.67636	8.89561	9.37795	6.65285	6.05405	6.1823
10534862	Pcolce	procollagen C-endopeptidase enhancer protein	0	3.02	8.11168		12.7704	12.8484	12.8061	9.8137	9.75084	9.78709
10531111	Sult1e1	sulfotransferase family 1E, member 1	0	3.02	8.11168		12.6459	12.6611	12.6079	9.91962	9.37301	9.56049
10544596	Tmem176b	transmembrane protein 176B	0	3.02	8.11168		12.3509	12.5561	12.3995	9.3771	9.40796	9.46268
10531919	Hsd17b11	hydroxysteroid (17-beta) dehydrogenase 11	0	3.01	8.05564		11.1094	11.0824	10.9635	8.08841	8.00819	8.02287
10465342	Tm7sf2	transmembrane 7 superfamily member 2	0	3.01	8.05564		10.9205	10.479	10.7765	7.73925	7.64034	7.75282
10565315	Fah	fumarylacetoacetate hydrolase	0	3	8		9.55212	9.53675	9.51431	6.70229	6.50901	6.38659
10451851	Armcx3	armadillo repeat containing, X-linked 3	0	2.99	7.94474		9.88612	10.1743	10.0801	6.91555	7.18277	7.07232
10346374	Aox1	aldehyde oxidase 1	0	2.98	7.88986		10.4955	10.5268	10.5529	7.6308	7.57638	7.41402
10585794	Cyp11a1	cytochrome P450, family 11, subfamily a, polypeptide 1	0	2.98	7.88986		13.1394	12.9019	13.1222	10.2852	9.74263	10.1949
10500570	Hao2	hydroxyacid oxidase 2	0	2.98	7.88986		9.12717	9.25517	9.34355	6.29606	6.27788	6.20568
10398075	Serpina3n	serine (or cysteine) peptidase inhibitor, clade A, member 3N	0.001	2.98	7.88986		9.76183	11.3115	9.6574	6.72361	7.90598	7.17559
10510129	Dhrs3	dehydrogenase/reductase (SDR family) member 3	0	2.97	7.83536		11.2078	11.1515	11.1314	8.12542	8.1814	8.26727
10413874	Ogdhl	oxoglutarate dehydrogenase-like	0	2.97	7.83536		11.4058	11.3544	11.3849	8.49492	8.35795	8.39287
10493203	0610031J06Rik	RIKEN cDNA 0610031J06 gene	0	2.96	7.78124		10.8094	10.8654	10.7798	7.80833	7.91246	7.85213
10457787	Klhl14	kelch-like 14 (Drosophila)	0	2.96	7.78124		9.51446	9.54068	9.24282	6.46601	6.35641	6.59693
10552599	Klk1b16	kallikrein 1-related peptidase b16	0	2.96	7.78124		8.30045	7.89013	7.76469	4.85259	5.27737	4.95117
10462507	Papss2	3'-phosphoadenosine 5'-phosphosulfate synthase 2	0	2.96	7.78124		9.93656	10.0798	9.7099	6.94153	7.01688	6.87974
10436196			0	2.96	7.78124		10.2208	10.3649	10.4467	7.43167	7.28413	7.44065
10551736	Ppp1r14a	protein phosphatase 1, regulatory (inhibitor) subunit 14A	0	2.95	7.72749		10.7954	11.1491	10.8457	8.08474	7.8389	8.01764
10498053	4930583H14Rik	RIKEN cDNA 4930583H14 gene	0	2.94	7.67411		10.89	10.8757	11.0084	8.16612	7.91406	7.88397
10545874	Cml5	camello-like 5	0	2.94	7.67411		9.30369	8.74815	9.17353	5.91281	6.14477	6.36277
10345065	Gsta3	glutathione S-transferase, alpha 3	0	2.94	7.67411		12.4957	12.3457	12.4803	9.70738	9.38016	9.41765
10494114	Selenbp1	selenium binding protein 1	0	2.94	7.67411		10.2647	10.0323	10.0526	7.24434	7.2553	7.03404
10349744	Slc45a3	solute carrier family 45, member 3	0	2.94	7.67411		10.2435	10.2655	10.0717	7.30122	7.16348	7.2868
10495625	Dpyd	dihydropyrimidine dehydrogenase	0	2.93	7.6211		9.89791	9.85308	9.96802	6.84473	7.13024	6.96612
10358982	Mr1	major histocompatibility complex, class I-related	0	2.93	7.6211		10.1444	10.2273	10.1943	7.24455	7.36277	7.15687
10431872			0	2.93	7.6211		7.94628	8.05663	8.98545	5.24688	5.26813	5.68413
10601778	Armcx3	armadillo repeat containing, X-linked 3	0	2.92	7.56846		9.56671	9.87552	9.7581	6.68337	6.82969	6.92427
10423011	Ugt3a2	UDP glycosyltransferases 3 family, polypeptide A2	0	2.92	7.56846		8.30974	8.45051	8.3496	5.52803	5.52248	5.28608
10500204	Ecm1	extracellular matrix protein 1	0	2.91	7.51618		10.9863	11.0229	10.8121	7.97112	8.06599	8.05697
10602592	Hsd17b10	hydroxysteroid (17-beta) dehydrogenase 10	0	2.91	7.51618		11.3924	11.2731	11.3278	8.41506	8.36116	8.48921
10540401	Lrrn1	leucine rich repeat protein 1, neuronal	0	2.91	7.51618		8.89647	9.18798	8.97014	6.08385	6.26472	5.98494
10408656	Peci	peroxisomal delta3, delta2-enoyl-Coenzyme A isomerase	0	2.9	7.46426		10.4898	10.513	10.4653	7.72431	7.64634	7.3986
10607877	Prps2	phosphoribosyl pyrophosphate synthetase 2	0	2.9	7.46426		10.2449	9.93902	10.2123	7.17994	7.13592	7.36775
10411274	Sv2c	synaptic vesicle glycoprotein 2c	0	2.9	7.46426		10.2938	10.3219	10.5702	7.61926	7.36239	7.51191
10497817	Anxa5	annexin A5	0	2.89	7.4127		11.7681	11.7643	11.7546	8.88117	8.80008	8.93303
10564857	Idh2	isocitrate dehydrogenase 2 (NADP+), mitochondrial	0	2.89	7.4127		10.3836	10.5117	10.3548	7.52231	7.51749	7.5412
10422312	Cldn10a	claudin 10A	0	2.88	7.3615		9.77926	9.64282	9.67618	6.99142	6.69031	6.78721
10545045	Fam13a	family with sequence similarity 13, member A	0	2.88	7.3615		8.58931	8.0659	8.4709	5.69105	5.30167	5.48199
10436804	Mrap	melanocortin 2 receptor accessory protein	0	2.88	7.3615		9.60959	9.54544	9.85686	6.81049	6.61714	6.94892
10405063	Ogn	osteoglycin	0	2.88	7.3615		10.1415	10.3968	10.0092	7.3914	7.33488	7.17432
10556583	Nucb2	nucleobindin 2	0	2.87	7.31065		11.4305	11.6735	11.4783	8.73537	8.64504	8.59105
10600597	Tmem47	transmembrane protein 47	0	2.87	7.31065		10.3238	10.309	10.2531	7.53699	7.24054	7.49275
10388545	Abr	active BCR-related gene	0	2.86	7.26015		10.7379	11.0668	10.8644	7.92728	7.9942	8.15536
10504606	Aldh1b1	aldehyde dehydrogenase 1 family, member B1	0	2.86	7.26015		9.86803	9.89153	9.96611	6.89578	7.12567	7.13592
10382846	BC018473	cDNA sequence BC018473	0	2.86	7.26015		9.79114	8.20492	9.37764	6.5711	5.80041	6.42164
10392881	Fdxr	ferredoxin reductase	0	2.86	7.26015		11.2881	11.3678	11.3139	8.46713	8.46694	8.46069
10494643	Hmgcs2	3-hydroxy-3-methylglutaryl-Coenzyme A synthase 2	0	2.86	7.26015		12.8847	12.9286	12.9251	10.2245	9.97652	9.94717
10436830	Ifnar2	interferon (alpha and beta) receptor 2	0	2.86	7.26015		10.1841	10.3644	10.2409	7.35973	7.406	7.43766
10424676	Ly6e	lymphocyte antigen 6 complex, locus E	0	2.86	7.26015		12.4273	12.5425	12.5223	9.54798	9.53649	9.82124
10360631	Cabc1	chaperone, ABC1 activity of bc1 complex like (S. pombe)	0	2.85	7.21		11.1897	11.0144	10.9803	8.27613	8.06308	8.29815
10480459	Hnmt	histamine N-methyltransferase	0	2.85	7.21		8.88114	8.71587	8.7766	5.97858	5.90229	5.93351
10400941	Dhrs7	dehydrogenase/reductase (SDR family) member 7	0	2.84	7.1602		11.3972	11.3765	11.2622	8.43573	8.5353	8.54848
10600936	Efnb1	ephrin B1	0	2.84	7.1602		10.3654	10.8838	10.3385	7.71245	7.68465	7.67476
10426891	Mettl7a1	methyltransferase like 7A1	0	2.84	7.1602		10.7627	10.9607	10.6584	7.92399	7.90374	8.01986
10602180	Tmem164	transmembrane protein 164	0	2.84	7.1602		11.3115	11.4937	11.3686	8.55243	8.47306	8.61658
10415844	Ctsb	cathepsin B	0	2.83	7.11074		12.3295	12.375	12.3609	9.56765	9.46999	9.52922
10568939	Echs1	enoyl Coenzyme A hydratase, short chain, 1, mitochondrial	0	2.83	7.11074		11.3011	11.1761	11.2093	8.52836	8.35501	8.32764
10374777	Efemp1	epidermal growth factor-containing fibulin-like extracellular matrix protein 1	0	2.83	7.11074		9.90648	9.8111	9.7508	7.09701	6.86081	7.03406
10355176	4921521F21Rik	RIKEN cDNA 4921521F21 gene	0	2.82	7.06162		12.9033	13.032	12.8987	10.2478	10.1369	9.99976
10558227	Acadsb	acyl-Coenzyme A dehydrogenase, short/branched chain	0	2.82	7.06162		11.2253	11.1101	11.1628	8.32255	8.46186	8.25989
10445338	Enpp5	ectonucleotide pyrophosphatase/phosphodiesterase 5	0	2.82	7.06162		11.9538	12.0025	12.0221	9.13431	9.12735	9.24838
10420935	Ephx2	epoxide hydrolase 2, cytoplasmic	0	2.82	7.06162		8.68696	8.83009	8.67459	6.11286	5.77554	5.83936
10362138	Vnn1	vanin 1	0	2.82	7.06162		8.8718	9.03036	8.93898	5.98586	6.43147	5.95876
10395058	Adi1	acireductone dioxygenase 1	0	2.81	7.01285		9.82772	9.6083	9.79772	7.01036	6.91685	6.86618
10550406	Ccdc8	coiled-coil domain containing 8	0	2.81	7.01285		8.71548	9.05627	8.50749	6.08941	6.09759	5.65219
10358709	Cox7b	cytochrome c oxidase subunit VIIb	0	2.81	7.01285		10.378	10.1812	10.2473	7.50956	7.41672	7.45434
10600082	Nsdhl	NAD(P) dependent steroid dehydrogenase-like	0	2.81	7.01285		11.457	11.0794	11.3733	8.54718	8.37657	8.544
10467162	Pank1	pantothenate kinase 1	0	2.81	7.01285		12.7497	12.6924	12.6562	10.1027	9.69994	9.87282
10469457	Plxdc2	plexin domain containing 2	0	2.81	7.01285		9.67982	9.71915	9.62777	7.00354	6.87484	6.71002
10512949	Abca1	ATP-binding cassette, sub-family A (ABC1), member 1	0	2.8	6.9644		11.9537	11.6342	11.7137	9.19469	8.74908	8.95281
10413803	Btd	biotinidase	0	2.8	6.9644		9.15855	9.17932	9.19019	6.37245	6.30517	6.44769
10461439	Fads1	fatty acid desaturase 1	0	2.8	6.9644		12.8763	12.8219	12.8668	10.174	9.81662	10.1706
10495830	Sec24d	Sec24 related gene family, member D (S. cerevisiae)	0	2.8	6.9644		9.43519	9.45006	9.61054	6.8597	6.66495	6.57301
10526712	Azgp1	alpha-2-glycoprotein 1, zinc	0	2.79	6.9163		8.03589	8.67278	8.29886	5.17322	5.68116	5.79793
10552418	Etfb	electron transferring flavoprotein, beta polypeptide	0	2.79	6.9163		11.4207	11.495	11.3126	8.60376	8.61502	8.63131
10485645	Rcn1	reticulocalbin 1	0	2.79	6.9163		10.4297	10.3804	10.3495	7.67123	7.67979	7.43674
10427624	Ugt3a1	UDP glycosyltransferases 3 family, polypeptide A1	0	2.79	6.9163		8.26236	8.21219	8.08953	5.40048	5.31781	5.48043
10541678	C1ra	complement component 1, r subcomponent A	0	2.78	6.86852		8.31185	8.70565	8.70048	6.07297	5.56274	5.74314
10520650	Cad	carbamoyl-phosphate synthetase 2, aspartate transcarbamylase, and dihydroorotase	0	2.78	6.86852		10.9146	11.3697	10.9012	8.30024	8.27544	8.27867
10583732	Ldlr	low density lipoprotein receptor	0	2.78	6.86852		9.69349	10.0729	10.0162	7.12529	7.24224	7.06228
10422822	Lifr	leukemia inhibitory factor receptor	0	2.78	6.86852		11.9524	11.7433	11.7279	9.16217	8.99725	8.91156
10428534	Trps1	trichorhinophalangeal syndrome I (human)	0	2.78	6.86852		8.34352	8.2619	8.35995	5.4249	5.66477	5.54209
10413482	Wnt5a	wingless-related MMTV integration site 5A	0	2.78	6.86852		8.60183	9.0312	8.82208	5.95721	6.2052	5.95377
10350630	Fam129a	family with sequence similarity 129, member A	0	2.77	6.82108		12.2634	11.5456	11.6729	9.05408	9.05668	9.07413
10509790	Aldh4a1	aldehyde dehydrogenase 4 family, member A1	0	2.76	6.77396		10.1227	9.99727	9.9899	7.3283	7.32983	7.17063
10436182	Cd47	CD47 antigen (Rh-related antigen, integrin-associated signal transducer)	0	2.76	6.77396		11.6568	11.6572	11.5439	8.94585	8.71393	8.91944
10581388	Lcat	lecithin cholesterol acyltransferase	0	2.76	6.77396		9.37882	9.58777	9.22536	6.53872	6.67128	6.70961
10600044	Prrg3	proline rich Gla (G-carboxyglutamic acid) 3 (transmembrane)	0	2.76	6.77396		9.39538	9.74169	9.34011	6.72461	6.83086	6.6553
10346882	Adam23	a disintegrin and metallopeptidase domain 23	0	2.75	6.72717		9.3745	9.67004	9.47994	6.77179	6.70394	6.80447
10559312	Dhcr7	7-dehydrocholesterol reductase	0	2.75	6.72717		10.8824	10.4183	10.958	8.12879	7.67009	8.19975
10504504	Grhpr	glyoxylate reductase/hydroxypyruvate reductase	0	2.75	6.72717		10.928	10.8673	10.8948	8.20216	8.20986	8.03202
10359917	Hsd17b7	hydroxysteroid (17-beta) dehydrogenase 7	0	2.75	6.72717		10.558	9.91163	10.8405	7.64829	7.51017	7.8951
10478048	Lbp	lipopolysaccharide binding protein	0	2.75	6.72717		11.1904	10.9707	11.1179	8.4077	8.3032	8.31917
10466087	Tmem109	transmembrane protein 109	0	2.75	6.72717		9.98898	10.1317	9.84364	7.33771	7.03031	7.3526
10511679	Decr1	2,4-dienoyl CoA reductase 1, mitochondrial	0	2.74	6.6807		10.7878	10.6184	10.7297	7.90305	7.94555	8.0651
10562211	Fxyd1	FXYD domain-containing ion transport regulator 1	0	2.74	6.6807		12.2154	12.1793	12.0706	9.41699	9.36678	9.45638
10491083	Nceh1	arylacetamide deacetylase-like 1	0	2.74	6.6807		9.43234	9.23794	9.43185	6.66766	6.62108	6.57986
10578916	Sc4mol	sterol-C4-methyl oxidase-like	0	2.74	6.6807		12.814	12.4449	12.912	10.096	9.70448	10.1374
10498024	Slc7a11	solute carrier family 7 (cationic amino acid transporter, y+ system), member 11	0	2.74	6.6807		10.54	10.4339	10.8961	7.81456	7.62356	8.22628
10490989	Cp	ceruloplasmin	0	2.73	6.63456		10.3546	10.782	10.3764	7.72789	7.91416	7.67322
10503508	Ggh	gamma-glutamyl hydrolase	0	2.73	6.63456		11.3823	11.4237	11.5156	8.80479	8.62877	8.71126
10503523	Ggh	gamma-glutamyl hydrolase	0	2.73	6.63456		11.3823	11.4237	11.5156	8.80479	8.62877	8.71126
10355214	Idh1	isocitrate dehydrogenase 1 (NADP+), soluble	0	2.73	6.63456		12.9024	12.8541	12.9531	10.2273	10.1712	10.1206
10587616	Prss35	protease, serine, 35	0	2.73	6.63456		10.657	10.5643	10.9222	7.98499	7.75341	8.20496
10523579	Arhgap24	Rho GTPase activating protein 24	0	2.72	6.58873		9.76523	9.67503	9.48364	6.95724	6.93413	6.88639
10509441	Ece1	endothelin converting enzyme 1	0	2.72	6.58873		10.3536	10.3449	10.4779	7.81355	7.55145	7.65601
10568436	Fgfr2	fibroblast growth factor receptor 2	0	2.72	6.58873		9.23989	9.60911	9.48795	6.56904	6.69555	6.89789
10545877	Nat8	N-acetyltransferase 8 (GCN5-related, putative)	0	2.72	6.58873		9.68223	9.34619	9.69772	6.75527	6.72218	7.08562
10493235	Paqr6	progestin and adipoQ receptor family member VI	0	2.72	6.58873		10.0422	10.7371	10.0561	7.37606	7.63086	7.67215
10563077	Rcn3	reticulocalbin 3, EF-hand calcium binding domain	0	2.72	6.58873		10.1763	10.4324	10.1645	7.3411	7.67411	7.61083
10363551	Tacr2	tachykinin receptor 2	0	2.72	6.58873		9.16717	9.12551	9.44245	6.56983	6.72741	6.29172
10591947	Acad8	acyl-Coenzyme A dehydrogenase family, member 8	0	2.71	6.54322		11.5705	11.5201	11.4927	8.81321	8.84064	8.78489
10589889	Glb1	galactosidase, beta 1	0	2.71	6.54322		10.2636	10.7052	10.6794	7.75068	7.98821	7.77342
10592585	Sc5d	sterol-C5-desaturase (fungal ERG3, delta-5-desaturase) homolog (S. cerevisae)	0	2.71	6.54322		11.8175	11.4346	11.9377	9.16072	8.81023	9.08635
10535841	Slc46a3	solute carrier family 46, member 3	0	2.71	6.54322		9.36415	9.42125	9.24603	6.58117	6.71516	6.60145
10565727	Tsku	tsukushin	0	2.71	6.54322		9.19026	9.66037	9.53237	6.55178	6.98613	6.71091
10474229	Cd59a	CD59a antigen	0	2.7	6.49802		11.1927	11.0802	11.0525	8.65173	8.25058	8.32112
10569057	Rnh1	ribonuclease/angiogenin inhibitor 1	0	2.7	6.49802		10.5249	10.4594	10.5811	7.83379	7.81418	7.81625
10604347	Smarca1	SWI/SNF related, matrix associated, actin dependent regulator of chromatin, subfamily a, member 1	0	2.7	6.49802		10.5664	10.5496	10.5431	7.87603	7.94446	7.7471
10547740	C1s	complement component 1, s subcomponent	0	2.69	6.45313		9.21871	9.84221	9.5695	6.7157	6.77033	7.08071
10576034	Irf8	interferon regulatory factor 8	0	2.69	6.45313		9.45079	9.90515	9.32077	6.92229	6.95775	6.71454
10398039	Serpina3f	serine (or cysteine) peptidase inhibitor, clade A, member 3F	0	2.69	6.45313		8.71955	9.05362	8.84393	6.07786	6.15791	6.32574
10601854	Wbp5	WW domain binding protein 5	0	2.69	6.45313		10.9246	11.0024	11.2147	8.45456	8.16074	8.46839
10397975	Ifi27l1	interferon, alpha-inducible protein 27 like 1	0	2.68	6.40856		11.0375	11.2315	11.1292	8.3131	8.46436	8.57937
10546829	Oxtr	oxytocin receptor	0	2.68	6.40856		9.81495	10.0874	9.89723	7.22871	7.23232	7.30423
10389719	Scpep1	serine carboxypeptidase 1	0	2.68	6.40856		12.0957	12.0674	11.9778	9.42612	9.3225	9.35066
10568001	Sult1a1	sulfotransferase family 1A, phenol-preferring, member 1	0	2.68	6.40856		9.69096	9.70171	9.54133	7.01176	6.83961	7.03246
10566529	Tpp1	tripeptidyl peptidase I	0	2.68	6.40856		10.4971	10.5195	10.4584	7.90706	7.7215	7.80671
10393177	Acox1	acyl-Coenzyme A oxidase 1, palmitoyl	0	2.67	6.36429		11.6163	11.6426	11.6569	8.96617	8.95469	8.9894
10460468	Ctsf	cathepsin F	0	2.67	6.36429		11.3296	11.2775	11.3497	8.62369	8.61632	8.71267
10371502	Fabp3	fatty acid binding protein 3, muscle and heart	0	2.67	6.36429		13.0606	13.1139	13.0141	10.5457	10.2524	10.3907
10571467	Pdgfrl	platelet-derived growth factor receptor-like	0	2.67	6.36429		8.52371	8.39444	8.63796	5.86807	5.91638	5.74777
10355567	Tmbim1	transmembrane BAX inhibitor motif containing 1	0	2.67	6.36429		9.81018	10.0272	9.66634	7.19051	7.06614	7.22661
10391146	Acly	ATP citrate lyase	0	2.66	6.32033		11.9649	11.6217	12.0636	9.27704	9.22153	9.17024
10406852	Cnn3	calponin 3, acidic	0	2.66	6.32033		8.59135	8.68319	8.63019	5.86097	6.1451	5.92803
10430851	Cyp2d22	cytochrome P450, family 2, subfamily d, polypeptide 22	0	2.66	6.32033		11.1101	11.1101	11.0906	8.506	8.42943	8.39408
10399540	Pqlc3	PQ loop repeat containing	0	2.66	6.32033		8.50458	8.47408	8.58665	5.79827	5.92123	5.87108
10531931	Sparcl1	SPARC-like 1	0	2.66	6.32033		11.9318	12.1241	11.7532	9.36455	9.29598	9.17078
10448202	Tpm4	tropomyosin 4	0	2.66	6.32033		11.4833	11.306	11.5231	8.73247	8.74307	8.84412
10369531	Tspan15	tetraspanin 15	0	2.66	6.32033		9.74709	9.8287	9.79596	7.08029	7.07259	7.23488
10360684	Ephx1	epoxide hydrolase 1, microsomal	0	2.65	6.27667		13.203	13.2041	13.1776	10.7199	10.4278	10.4804
10606735	Armcx2	armadillo repeat containing, X-linked 2	0	2.64	6.23332		9.20766	9.56544	9.39603	6.79437	6.65851	6.7816
10467041	Asah2	N-acylsphingosine amidohydrolase 2	0	2.64	6.23332		10.2909	10.4076	10.2485	7.67924	7.82915	7.52562
10571840	Hpgd	hydroxyprostaglandin dehydrogenase 15 (NAD)	0	2.64	6.23332		11.487	11.3223	11.1275	8.77998	8.52583	8.69896
10485294	Hsd17b12	hydroxysteroid (17-beta) dehydrogenase 12	0	2.64	6.23332		11.2834	11.2473	11.4322	8.75545	8.51515	8.7758
10497773	Mccc1	methylcrotonoyl-Coenzyme A carboxylase 1 (alpha)	0	2.64	6.23332		10.185	10.1084	10.155	7.48777	7.59689	7.44703
10497149	Wls	wntless homolog (Drosophila)	0	2.64	6.23332		9.019	9.13629	9.1936	6.55993	6.29717	6.58329
10533345	Aldh2	aldehyde dehydrogenase 2, mitochondrial	0	2.63	6.19026		12.8582	12.8468	12.8525	10.2434	10.2264	10.1908
10487645	Cpxm1	carboxypeptidase X 1 (M14 family)	0	2.63	6.19026		10.3492	9.91282	10.0251	7.61901	7.4003	7.36982
10495549	Dbt	dihydrolipoamide branched chain transacylase E2	0	2.63	6.19026		10.3543	10.3811	10.4305	7.69237	7.74234	7.8509
10465580	Nudt22	nudix (nucleoside diphosphate linked moiety X)-type motif 22	0	2.63	6.19026		9.47115	9.98916	9.60821	7.16758	7.17968	6.81821
10364375	Cstb	cystatin B	0	2.62	6.1475		9.03086	8.92189	9.02292	6.44498	6.25277	6.40703
10553743	Oca2	oculocutaneous albinism II	0	2.62	6.1475		9.31035	9.56294	9.41798	6.78103	6.76054	6.89114
10484389	Tfpi	tissue factor pathway inhibitor	0	2.62	6.1475		9.14154	9.32525	9.28327	6.54532	6.76445	6.57965
10457475	Abhd3	abhydrolase domain containing 3	0	2.61	6.10504		10.9992	11.0129	11.1811	8.37363	8.41241	8.56778
10350853	BC026585	cDNA sequence BC026585	0	2.61	6.10504		10.1502	9.9878	9.98661	7.2851	7.38271	7.62525
10605090	Idh3g	isocitrate dehydrogenase 3 (NAD+), gamma	0	2.61	6.10504		11.3464	11.3277	11.413	8.81736	8.80175	8.6278
10496475	Adh5	alcohol dehydrogenase 5 (class III), chi polypeptide	0	2.6	6.06287		11.685	11.7807	11.817	9.14423	9.08814	9.25999
10601356	Cox7b	cytochrome c oxidase subunit VIIb	0	2.6	6.06287		9.56424	9.44859	9.38905	6.88736	6.85984	6.84434
10566034	Folr1	folate receptor 1 (adult)	0	2.6	6.06287		9.99194	10.0902	9.99521	7.35821	7.54392	7.36823
10588899	Gpx1	glutathione peroxidase 1	0	2.6	6.06287		11.1909	11.1364	11.0941	8.58644	8.4521	8.5753
10461721	Mpeg1	macrophage expressed gene 1	0	2.6	6.06287		10.0087	10.3455	10.3113	7.53572	7.58435	7.74327
10422598	Sepp1	selenoprotein P, plasma, 1	0	2.6	6.06287		11.346	11.4841	11.2826	8.84554	8.75591	8.72272
10508614	Fabp3	fatty acid binding protein 3, muscle and heart	0	2.59	6.02099		13.0925	13.141	13.0324	10.6181	10.3817	10.5111
10435271	Heg1	HEG homolog 1 (zebrafish)	0	2.59	6.02099		11.2701	11.87	11.6735	8.98548	9.0536	9.01557
10423556	Pgcp	plasma glutamate carboxypeptidase	0	2.59	6.02099		11.9775	12.0538	12.1094	9.47979	9.39621	9.48116
10504234	Unc13b	unc-13 homolog B (C. elegans)	0	2.59	6.02099		10.6467	11.0684	10.7602	8.17259	8.4033	8.14303
10356084	Irs1	insulin receptor substrate 1	0	2.58	5.9794		8.99644	9.0281	9.13093	6.61607	6.57179	6.24132
10469151	Itih5	inter-alpha (globulin) inhibitor H5	0	2.58	5.9794		9.03683	9.40055	9.14279	6.5234	6.67877	6.62691
10445214	Mut	methylmalonyl-Coenzyme A mutase	0	2.58	5.9794		11.3505	11.3651	11.429	8.78109	8.8193	8.79339
10468869	Prdx3	peroxiredoxin 3	0	2.58	5.9794		12.0909	12.026	12.0849	9.54096	9.40852	9.50429
10415282	Psme1	proteasome (prosome, macropain) 28 subunit, alpha	0	2.58	5.9794		11.0247	10.9172	10.9977	8.32007	8.28758	8.58255
10424126	Depdc6	DEP domain containing 6	0	2.57	5.93809		9.40133	9.58479	9.41637	6.6864	6.97582	7.02612
10374366	Egfr	epidermal growth factor receptor	0	2.57	5.93809		9.91924	9.80199	9.76806	7.25508	7.25541	7.27743
10384603	Mdh1	malate dehydrogenase 1, NAD (soluble)	0	2.57	5.93809		11.6625	11.6972	11.7922	9.18164	9.04261	9.23198
10404429	Serpinb9	serine (or cysteine) peptidase inhibitor, clade B, member 9	0	2.57	5.93809		8.02153	8.16344	8.19421	5.33409	5.52833	5.80156
10601328	Uprt	uracil phosphoribosyltransferase (FUR1) homolog (S. cerevisiae)	0	2.57	5.93809		8.20489	8.218	8.21078	5.73468	5.73759	5.45982
10501500			0	2.57	5.93809		7.93973	8.13914	7.67845	5.44754	5.29871	5.30019
10501511			0	2.57	5.93809		7.93973	8.13914	7.67845	5.44754	5.29871	5.30019
10501522			0	2.57	5.93809		7.93973	8.13914	7.67845	5.44754	5.29871	5.30019
10501533			0	2.57	5.93809		7.93973	8.13914	7.67845	5.44754	5.29871	5.30019
10452118	Lonp1	lon peptidase 1, mitochondrial	0	2.56	5.89708		10.7475	10.7339	10.7298	8.16028	8.13889	8.23066
10494085	Selenbp2	selenium binding protein 2	0	2.56	5.89708		9.01003	8.86798	8.8276	6.0174	6.8717	6.12448
10502205	Hadh	hydroxyacyl-Coenzyme A dehydrogenase	0	2.55	5.85634		12.6227	12.5379	12.5925	10.0919	10.0142	9.98928
10445826	Mocs1	molybdenum cofactor synthesis 1	0	2.55	5.85634		9.12366	9.1186	9.21889	6.66448	6.56039	6.59216
10482237	Nr5a1	nuclear receptor subfamily 5, group A, member 1	0	2.55	5.85634		10.9262	11.3575	10.8776	8.55997	8.59782	8.35579
10599200	Pgrmc1	progesterone receptor membrane component 1	0	2.55	5.85634		12.471	12.4721	12.556	10.0078	9.82567	10.0065
10438272	Prodh	proline dehydrogenase	0	2.55	5.85634		9.37689	9.4123	9.41505	6.99	6.56633	6.98768
10375679	Tbc1d9b	TBC1 domain family, member 9B	0	2.55	5.85634		10.83	10.9178	10.7404	8.29456	8.33241	8.21733
10559509	Cdc42ep5	CDC42 effector protein (Rho GTPase binding) 5	0	2.54	5.81589		10.2588	10.2465	9.94809	7.61513	7.58628	7.63884
10388465	Doc2b	double C2, beta	0	2.54	5.81589		9.16021	9.38057	9.15991	6.79882	6.6732	6.61215
10458090	Reep5	receptor accessory protein 5	0	2.54	5.81589		10.5389	10.6059	10.4059	8.03317	7.783	8.1163
10578361	Asah1	N-acylsphingosine amidohydrolase 1	0	2.53	5.77572		11.8229	11.7052	11.7781	9.1978	9.23046	9.28243
10423080	C1qtnf3	C1q and tumor necrosis factor related protein 3	0	2.53	5.77572		9.72887	9.49914	9.61539	7.1356	7.06717	7.05048
10506571	Dhcr24	24-dehydrocholesterol reductase	0	2.53	5.77572		12.1935	12.2352	12.0982	9.76409	9.55801	9.60413
10498837	Etfdh	electron transferring flavoprotein, dehydrogenase	0	2.53	5.77572		11.748	11.6916	11.8009	9.23853	9.20267	9.21966
10553913	Mcee	methylmalonyl CoA epimerase	0	2.53	5.77572		10.4119	10.4552	10.4543	7.84328	7.90315	7.99851
10423654	Osr2	odd-skipped related 2 (Drosophila)	0	2.53	5.77572		10.1529	9.69169	9.78908	7.54801	7.24596	7.25444
10501420	Stxbp3a	syntaxin binding protein 3A	0	2.53	5.77572		10.3204	10.2258	10.5333	7.83021	7.85862	7.81457
10495659	Cnn3	calponin 3, acidic	0	2.52	5.73582		9.72381	9.70331	9.57637	7.09629	7.08884	7.25489
10483178	Cobll1	Cobl-like 1	0	2.52	5.73582		10.4785	10.5099	10.5018	7.91461	7.91969	8.10041
10438575	Ehhadh	enoyl-Coenzyme A, hydratase/3-hydroxyacyl Coenzyme A dehydrogenase	0	2.52	5.73582		8.83548	8.60143	8.87315	6.12704	6.41772	6.21076
10406205	Erap1	endoplasmic reticulum aminopeptidase 1	0	2.52	5.73582		9.1348	9.36981	9.48208	6.91065	6.7128	6.80647
10544462	Fam115a	family with sequence similarity 115, member A	0	2.52	5.73582		9.56244	9.51593	9.75555	7.04129	7.2482	6.98517
10607587	Pdha1	pyruvate dehydrogenase E1 alpha 1	0	2.52	5.73582		10.3409	10.3162	10.5039	7.76945	7.79667	8.03986
10369761	Reep3	receptor accessory protein 3	0	2.52	5.73582		10.1918	10.2766	10.1328	7.72729	7.64602	7.66627
10489204	Tgm2	transglutaminase 2, C polypeptide	0	2.52	5.73582		10.6653	10.2654	10.6607	8.10407	7.77897	8.14089
10460157	Cpt1a	carnitine palmitoyltransferase 1a, liver	0	2.51	5.6962		11.4761	11.505	11.4976	9.0507	8.9629	8.93232
10597413	Crtap	cartilage associated protein	0	2.51	5.6962		10.918	10.9326	10.7647	8.46889	8.26588	8.35473
10347277	Igfbp2	insulin-like growth factor binding protein 2	0	2.51	5.6962		10.0375	10.0668	9.66377	7.5785	7.32395	7.33021
10354307	Txn1	thioredoxin 1	0	2.51	5.6962		11.9168	12.0526	12.1228	9.47859	9.33765	9.74008
10606730	Armcx6	armadillo repeat containing, X-linked 6	0	2.5	5.65685		8.7601	8.95108	8.73831	6.23951	6.13303	6.58468
10600377	Atp6ap1	ATPase, H+ transporting, lysosomal accessory protein 1	0	2.5	5.65685		11.808	11.8357	11.8801	9.3785	9.26177	9.39179
10580233	Gcdh	glutaryl-Coenzyme A dehydrogenase	0	2.5	5.65685		9.82208	9.64525	9.84935	7.44432	7.10889	7.2641
10412207	Gpx8	glutathione peroxidase 8 (putative)	0	2.5	5.65685		9.19442	8.96884	9.24607	6.52733	6.72531	6.65778
10581865	Ldhd	lactate dehydrogenase D	0	2.5	5.65685		10.0132	9.96664	9.89598	7.38433	7.47469	7.51332
10492355	Mme	membrane metallo endopeptidase	0	2.5	5.65685		10.8189	10.7852	10.7923	8.35723	8.28198	8.2697
10446013	Mpnd	MPN domain containing	0	2.5	5.65685		9.97356	9.90434	9.79248	7.29479	7.57729	7.30954
10606206	C77370	expressed sequence C77370	0	2.49	5.61778		7.85632	7.92544	7.97897	5.65993	5.24358	5.38061
10417167	Clybl	citrate lyase beta like	0	2.49	5.61778		9.93461	9.85492	9.90183	7.30016	7.36423	7.54732
10479938	Echdc3	enoyl Coenzyme A hydratase domain containing 3	0	2.49	5.61778		8.76314	8.71567	8.56254	6.29808	6.29498	5.97009
10607497	Suclg2	succinate-Coenzyme A ligase, GDP-forming, beta subunit	0	2.49	5.61778		11.4252	11.2285	11.3601	8.88365	8.79008	8.86263
10348354	Ugt1a9	UDP glucuronosyltransferase 1 family, polypeptide A9	0	2.49	5.61778		9.646	9.74522	9.6649	7.33405	7.10469	7.14448
10423090	Amacr	alpha-methylacyl-CoA racemase	0	2.48	5.57897		9.88124	9.61993	9.75608	7.29185	7.13554	7.39733
10361282	Cr1l	complement component (3b/4b) receptor 1-like	0	2.48	5.57897		9.23993	9.31846	9.34687	6.87869	6.85221	6.73899
10405033	Ecm2	extracellular matrix protein 2, female organ and adipocyte specific	0	2.48	5.57897		8.37145	8.57992	8.47696	6.02773	6.19751	5.76231
10383756	Ifitm2	interferon induced transmembrane protein 2	0	2.48	5.57897		10.2803	10.4366	10.3457	7.84984	7.72765	8.03769
10490551	Nkain4	Na+/K+ transporting ATPase interacting 4	0	2.48	5.57897		9.99787	10.1117	9.62418	7.41764	7.6144	7.26166
10480734	Ptgds	prostaglandin D2 synthase (brain)	0	2.48	5.57897		13.1285	13.0621	13.0442	10.8243	10.419	10.5469
10600301	Ssr4	signal sequence receptor, delta	0	2.48	5.57897		10.7635	10.8986	10.784	8.2396	8.26725	8.50085
10407876	5033411D12Rik	RIKEN cDNA 5033411D12 gene	0	2.47	5.54044		9.55844	9.52988	9.48965	6.86478	7.12571	7.18365
10426760	Aqp2	aquaporin 2	0	2.47	5.54044		10.8331	10.2164	10.7073	8.28678	7.97503	8.08145
10451451	Gnmt	glycine N-methyltransferase	0	2.47	5.54044		8.76856	8.85614	8.69434	6.3301	6.28263	6.2917
10595148	Gsta2	glutathione S-transferase, alpha 2 (Yc2)	0	2.47	5.54044		11.4585	11.3242	11.308	9.06483	8.74624	8.85941
10530841	Igfbp7	insulin-like growth factor binding protein 7	0	2.47	5.54044		12.1959	12.1697	12.1498	9.63991	9.67431	9.79446
10388902	Lgals9	lectin, galactose binding, soluble 9	0	2.47	5.54044		9.33314	9.22234	9.41265	6.98773	6.67098	6.89457
10461093	Pla2g16	phospholipase A2, group XVI	0	2.47	5.54044		8.5004	8.88489	8.90979	6.33442	6.30624	6.25389
10546538	Suclg2	succinate-Coenzyme A ligase, GDP-forming, beta subunit	0	2.47	5.54044		11.1663	10.9848	11.1201	8.70244	8.52962	8.61446
10401473	Aldh6a1	aldehyde dehydrogenase family 6, subfamily A1	0	2.46	5.50217		11.8482	11.7316	11.773	9.43041	9.24905	9.29466
10347481	Cyp27a1	cytochrome P450, family 27, subfamily a, polypeptide 1	0	2.46	5.50217		10.0669	10.225	10.0551	7.74363	7.66249	7.54754
10503966	Aco1	aconitase 1	0	2.45	5.46416		10.921	10.8207	11.0145	8.4132	8.43839	8.56112
10420372	Cryl1	crystallin, lambda 1	0	2.45	5.46416		9.94625	9.98703	9.94086	7.32052	7.55995	7.65286
10587323	Gsta1	glutathione S-transferase, alpha 1 (Ya)	0	2.45	5.46416		11.6937	11.5703	11.5384	9.33379	8.92473	9.20309
10463836	Gsto1	glutathione S-transferase omega 1	0	2.45	5.46416		9.11707	9.12862	9.27846	6.66265	6.93404	6.57855
10355536	Tns1	tensin 1	0	2.45	5.46416		10.9697	11.5279	10.9185	8.73359	8.7681	8.57229
10408741	Txndc5	thioredoxin domain containing 5	0	2.45	5.46416		11.2706	11.3965	11.2861	8.87356	8.88816	8.83866
10501544			0	2.45	5.46416		7.65261	7.81377	7.34545	5.14973	5.32078	5.00092
10607738	Car5b	carbonic anhydrase 5b, mitochondrial	0	2.44	5.42642		10.6792	10.4947	10.6608	8.20839	8.23192	8.08572
10563314	Dhdh	dihydrodiol dehydrogenase (dimeric)	0	2.44	5.42642		9.42243	9.44793	9.38926	7.01028	7.12731	6.80879
10420631	Ebpl	emopamil binding protein-like	0	2.44	5.42642		10.1033	10.2714	10.2138	7.62329	7.672	7.97081
10563085	Fcgrt	Fc receptor, IgG, alpha chain transporter	0	2.44	5.42642		10.3836	10.5378	10.2772	7.85858	7.99329	8.01365
10508800	Gm3579	predicted gene 3579	0	2.44	5.42642		11.3782	11.5687	11.4841	9.12372	9.05757	8.94244
10573865	Gm3579	predicted gene 3579	0	2.44	5.42642		11.3782	11.5687	11.4841	9.12372	9.05757	8.94244
10474836	Ivd	isovaleryl coenzyme A dehydrogenase	0	2.44	5.42642		11.8213	11.886	11.852	9.38312	9.46347	9.38821
10525471	Ndufb11	NADH dehydrogenase (ubiquinone) 1 beta subcomplex, 11	0	2.44	5.42642		10.2709	10.3074	10.261	7.75564	7.60014	8.16154
10494428	Txnip	thioredoxin interacting protein	0	2.44	5.42642		12.5258	12.605	12.435	10.115	10.1213	10.0146
10346410	Aox3	aldehyde oxidase 3	0	2.43	5.38893		11.3127	11.6496	11.2153	8.95359	9.11882	8.8122
10496569	Gbp6	guanylate binding protein 6	0	2.43	5.38893		8.75237	8.78928	8.85061	6.46924	6.25886	6.37067
10425207	H1f0	H1 histone family, member 0	0	2.43	5.38893		10.7471	10.9318	10.5818	8.42059	8.3903	8.16563
10588037	Rbp1	retinol binding protein 1, cellular	0	2.43	5.38893		11.6583	11.9479	11.5913	9.17492	9.25619	9.46845
10608712	Tmlhe	trimethyllysine hydroxylase, epsilon	0	2.43	5.38893		7.41602	7.49176	7.57545	4.98163	5.06169	5.15533
10427436			0	2.43	5.38893		12.7465	13.0476	12.8048	10.434	10.5345	10.3486
10536635	A430107O13Rik	RIKEN cDNA A430107O13 gene	0	2.42	5.35171		10.2203	10.2155	10.0059	7.78013	7.8129	7.58239
10593723	Acsbg1	acyl-CoA synthetase bubblegum family member 1	0	2.42	5.35171		13.2998	13.301	13.302	10.9939	10.8794	10.7712
10540028	Klf15	Kruppel-like factor 15	0	2.42	5.35171		9.64037	9.70538	9.61356	7.34931	7.11727	7.24381
10514054	Nfib	nuclear factor I/B	0	2.42	5.35171		8.89725	9.2717	8.90885	6.64561	6.72919	6.4362
10561306	Pld3	phospholipase D family, member 3	0	2.42	5.35171		12.4079	12.4346	12.4192	10.0216	9.88452	10.0912
10538753			0	2.42	5.35171		8.6234	8.29846	8.73168	6.01246	6.23819	6.13026
10457114	Bhmt	betaine-homocysteine methyltransferase	0	2.41	5.31474		13.4249	13.2993	13.37	11.1837	10.7567	10.9169
10606714	Gla	galactosidase, alpha	0	2.41	5.31474		8.90346	9.01703	9.1444	6.56842	6.43013	6.82515
10569319	Ctsd	cathepsin D	0	2.4	5.27803		12.4565	12.4382	12.4727	10.1301	9.93902	10.1063
10563441	Emp3	epithelial membrane protein 3	0	2.4	5.27803		11.4603	11.5145	11.5486	9.05556	9.02566	9.23306
10607302	Gnl3l	guanine nucleotide binding protein-like 3 (nucleolar)-like	0	2.4	5.27803		9.5916	9.59781	9.69266	7.24516	7.21589	7.23128
10599463	Xpnpep2	X-prolyl aminopeptidase (aminopeptidase P) 2, membrane-bound	0	2.4	5.27803		7.74134	7.72973	8.0285	5.53535	5.4417	5.32551
10367282	Cnpy2	canopy 2 homolog (zebrafish)	0	2.39	5.24157		9.70575	9.78033	9.71436	7.54973	7.1914	7.30263
10449940	Cyp4f14	cytochrome P450, family 4, subfamily f, polypeptide 14	0	2.39	5.24157		8.74526	8.68234	8.70474	6.19014	6.27422	6.50452
10553299	Ifitm2	interferon induced transmembrane protein 2	0	2.39	5.24157		9.64414	9.85644	9.70517	7.41967	7.22065	7.38701
10364194	Lss	lanosterol synthase	0	2.39	5.24157		10.7909	9.7453	10.7343	8.06958	7.97183	8.06735
10514049	Nfib	nuclear factor I/B	0	2.39	5.24157		8.81787	9.10987	8.87194	6.49639	6.55724	6.56985
10447130	Pkdcc	protein kinase domain containing, cytoplasmic	0	2.39	5.24157		9.84954	9.85538	9.58776	7.42906	7.37993	7.30986
10587799	Plscr2	phospholipid scramblase 2	0	2.39	5.24157		7.38499	7.58916	7.45307	5.1585	5.07633	5.03616
10532926	Acads	acyl-Coenzyme A dehydrogenase, short chain	0	2.38	5.20537		10.6086	10.3651	10.4996	8.24023	8.11238	7.98153
10587339	Gm10639	predicted gene 10639	0	2.38	5.20537		11.4139	11.2764	11.3012	9.08607	8.80543	8.94995
10520612	Khk	ketohexokinase	0	2.38	5.20537		9.35182	9.34545	9.3751	6.84188	7.05387	7.02957
10523479	Slc25a5	solute carrier family 25 (mitochondrial carrier, adenine nucleotide translocator), member 5	0	2.38	5.20537		11.7295	11.746	11.8394	9.47874	9.34671	9.34933
10599215	Slc25a5	solute carrier family 25 (mitochondrial carrier, adenine nucleotide translocator), member 5	0	2.38	5.20537		11.8211	11.8004	11.9085	9.54989	9.41241	9.43154
10545409	Vamp8	vesicle-associated membrane protein 8	0	2.38	5.20537		10.2125	10.1812	10.2196	7.72924	7.77808	7.97224
10344466			0	2.38	5.20537		8.00039	8.70786	8.36101	5.56161	5.94573	6.42587
10511886	Bhmt	betaine-homocysteine methyltransferase	0	2.37	5.16941		13.5149	13.3477	13.4075	11.239	10.8966	11.0137
10593483	Fdx1	ferredoxin 1	0	2.37	5.16941		11.2591	11.0029	11.4639	8.88831	8.78603	8.92913
10605919	Pja1	praja1, RING-H2 motif containing	0	2.37	5.16941		11.791	11.8664	12.0306	9.46589	9.55903	9.56414
10587829	Plod2	procollagen lysine, 2-oxoglutarate 5-dioxygenase 2	0	2.37	5.16941		9.84043	9.78935	9.91493	7.52676	7.45107	7.47064
10373834	Sec14l4	SEC14-like 4 (S. cerevisiae)	0	2.37	5.16941		8.78306	8.98165	8.82104	6.33421	6.53274	6.61975
10503023	Cth	cystathionase (cystathionine gamma-lyase)	0	2.36	5.1337		8.73454	8.60422	8.64269	6.1596	6.24922	6.50099
10511375	Cyp7a1	cytochrome P450, family 7, subfamily a, polypeptide 1	0	2.36	5.1337		7.35915	6.5276	7.71101	4.80452	4.74352	4.96701
10413932	E130203B14Rik	RIKEN cDNA E130203B14 gene	0	2.36	5.1337		11.6978	11.6511	11.6149	9.21881	9.35746	9.31558
10381588	Grn	granulin	0	2.36	5.1337		11.5835	11.7081	11.5413	9.27874	9.16688	9.31488
10587331	Gsta1	glutathione S-transferase, alpha 1 (Ya)	0	2.36	5.1337		11.6461	11.5078	11.487	9.29555	9.07929	9.19075
10353181	Lactb2	lactamase, beta 2	0	2.36	5.1337		8.42884	8.37979	8.62115	6.18417	6.31791	5.8545
10429520	Ly6d	lymphocyte antigen 6 complex, locus D	0.001	2.36	5.1337		9.4274	8.6456	9.36538	6.86472	6.64151	6.85834
10385966	Anxa6	annexin A6	0	2.35	5.09824		10.3978	10.3703	10.4376	8.11112	8.09248	7.95476
10443898	Cyp4f15	cytochrome P450, family 4, subfamily f, polypeptide 15	0	2.35	5.09824		8.23109	8.18746	8.26616	6.02291	5.70932	5.90212
10370000	Gstt1	glutathione S-transferase, theta 1	0	2.35	5.09824		9.38094	9.80447	9.44471	7.03831	7.26897	7.2587
10355996	Slc25a5	solute carrier family 25 (mitochondrial carrier, adenine nucleotide translocator), member 5	0	2.35	5.09824		11.4257	11.3652	11.4869	9.1772	9.06515	8.99393
10566358	Trim30	tripartite motif-containing 30	0	2.35	5.09824		8.69483	8.73307	8.85395	6.48241	6.16334	6.58897
10447885	Acat3	acetyl-Coenzyme A acetyltransferase 3	0	2.34	5.06303		8.41704	8.62844	8.36922	6.08538	6.45598	5.86561
10512847	Alg2	asparagine-linked glycosylation 2 homolog (yeast, alpha-1,3-mannosyltransferase)	0	2.34	5.06303		10.1011	10.2257	10.2866	7.8902	7.77768	7.91555
10442596	Sepx1	selenoprotein X 1	0	2.34	5.06303		10.189	10.1385	10.1441	7.88098	7.62471	7.94628
10455374	Stk32a	serine/threonine kinase 32A	0	2.34	5.06303		8.34172	8.73298	8.35772	5.98166	6.14818	6.29258
10535532	Tecpr1	tectonin beta-propeller repeat containing 1	0	2.34	5.06303		10.6283	10.8627	10.6366	8.42185	8.35643	8.32208
10355534	Tns1	tensin 1	0	2.34	5.06303		10.3526	11.0513	10.2953	8.30205	8.29547	8.08601
10347491	Wnt6	wingless-related MMTV integration site 6	0	2.34	5.06303		9.62014	9.88484	9.48407	7.35946	7.23645	7.37567
10593591	Acat1	acetyl-Coenzyme A acetyltransferase 1	0	2.33	5.02805		11.4527	11.5044	11.495	9.23791	9.15396	9.07682
10534120	Asl	argininosuccinate lyase	0	2.33	5.02805		10.2617	10.104	10.1599	7.84393	7.89667	7.78852
10442445	Dci	dodecenoyl-Coenzyme A delta isomerase (3,2 trans-enoyl-Coenyme A isomerase)	0	2.33	5.02805		9.70337	9.6583	9.62857	7.218	7.46991	7.31623
10546760	Ddx3x	DEAD/H (Asp-Glu-Ala-Asp/His) box polypeptide 3, X-linked	0	2.33	5.02805		10.022	10.3848	10.2736	7.89881	7.86508	7.92812
10465895	Fads2	fatty acid desaturase 2	0	2.33	5.02805		13.13	13.0069	13.1467	10.8534	10.521	10.9285
10436456	Pros1	protein S (alpha)	0	2.33	5.02805		11.533	11.6665	11.5696	9.24376	9.25662	9.27098
10380260	Trim25	tripartite motif-containing 25	0	2.33	5.02805		9.48529	9.49612	9.38488	7.14211	7.16066	7.0617
10544089	Zc3hav1	zinc finger CCCH type, antiviral 1	0	2.33	5.02805		9.13242	9.21504	9.08283	6.93098	6.87315	6.62848
10600901	Ar	androgen receptor	0	2.32	4.99332		9.57831	9.81427	9.63086	7.37625	7.35218	7.33901
10462140	Dock8	dedicator of cytokinesis 8	0	2.32	4.99332		10.0102	10.1238	9.97764	7.79871	7.71313	7.63979
10535025	Got2	glutamate oxaloacetate transaminase 2, mitochondrial	0	2.32	4.99332		10.5484	10.565	10.5404	8.28145	8.1058	8.30368
10411171	Pde8b	phosphodiesterase 8B	0	2.32	4.99332		9.20058	9.00052	9.13231	6.69377	6.81984	6.86239
10398019	Serpina5	serine (or cysteine) peptidase inhibitor, clade A, member 5	0	2.32	4.99332		12.4892	12.4126	12.4976	10.2949	10.1542	9.97921
10465853			0	2.32	4.99332		10.7355	10.5473	10.7754	8.39402	8.41101	8.28309
10588505	Abhd14b	abhydrolase domain containing 14b	0	2.31	4.95883		9.28879	9.71985	9.61269	7.02862	7.47385	7.20244
10590957	Fut4	fucosyltransferase 4	0	2.31	4.95883		7.67052	8.12517	7.63615	5.24079	5.52664	5.72934
10468533	Gpam	glycerol-3-phosphate acyltransferase, mitochondrial	0	2.31	4.95883		11.0262	10.9604	11.1808	8.8135	8.72815	8.69455
10411373	Hexb	hexosaminidase B	0	2.31	4.95883		9.5253	9.33377	9.63885	7.07527	7.23094	7.26894
10404059	Hist1h1c	histone cluster 1, H1c	0	2.31	4.95883		9.24872	9.12469	9.41989	7.13255	6.78926	6.94562
10507500	Slc6a9	solute carrier family 6 (neurotransmitter transporter, glycine), member 9	0	2.31	4.95883		9.45284	9.72049	9.61041	7.15837	7.26134	7.44172
10553324	Tmem86a	transmembrane protein 86A	0	2.31	4.95883		10.7184	10.8085	10.6499	8.27681	8.38528	8.59113
10584435	Vwa5a	von Willebrand factor A domain containing 5A	0	2.31	4.95883		9.17393	9.12027	9.23551	6.80572	6.83573	6.96214
10340089			0	2.31	4.95883		6.53616	6.69311	5.90625	3.90222	4.57258	3.7418
10481621	1110008P14Rik	RIKEN cDNA 1110008P14 gene	0	2.3	4.92458		8.61299	8.59286	8.46722	6.36563	6.17827	6.24186
10414269	Bnip3	BCL2/adenovirus E1B interacting protein 3	0	2.3	4.92458		11.0521	11.1305	10.941	8.8319	8.75192	8.63068
10599654	Cxx1c	CAAX box 1 homolog C (human)	0	2.3	4.92458		8.97499	8.94745	8.7303	6.2733	6.54517	6.92058
10345762	Il1r1	interleukin 1 receptor, type I	0	2.3	4.92458		10.0258	9.98756	10.1883	7.80517	7.76829	7.72199
10530269	Rbm47	RNA binding motif protein 47	0	2.3	4.92458		10.5073	10.5574	10.5528	8.09378	8.39649	8.22857
10367041	Rdh9	retinol dehydrogenase 9	0	2.3	4.92458		7.77028	7.58193	7.63555	5.37546	5.23129	5.48109
10359929	Ddr2	discoidin domain receptor family, member 2	0	2.29	4.89056		9.29269	9.73483	9.43788	7.1827	7.28048	7.14369
10447891	Acat2	acetyl-Coenzyme A acetyltransferase 2	0	2.28	4.85678		10.1329	9.8411	10.2883	7.83431	7.71322	7.8862
10464586	Gstp2	glutathione S-transferase, pi 2	0	2.28	4.85678		10.0693	10.2266	10.117	7.9664	7.77607	7.81944
10469312	Pter	phosphotriesterase related	0	2.28	4.85678		8.31295	7.90486	8.34247	5.7812	5.84191	6.1078
10542911	Samd9l	sterile alpha motif domain containing 9-like	0	2.28	4.85678		7.85305	7.63058	8.02649	5.49203	5.61925	5.57028
10383502	Slc16a3	solute carrier family 16 (monocarboxylic acid transporters), member 3	0	2.28	4.85678		9.44618	9.41209	9.94977	7.33207	7.31037	7.32125
10409162	Susd3	sushi domain containing 3	0	2.28	4.85678		10.2412	10.0908	10.0658	7.78305	7.81783	7.95747
10489391	Ada	adenosine deaminase	0	2.27	4.82323		8.27583	8.68298	8.5284	6.39814	6.2603	6.00562
10386455	Rasd1	RAS, dexamethasone-induced 1	0	2.27	4.82323		11.115	10.7736	10.7639	8.68889	8.58317	8.56116
10436519	Robo1	roundabout homolog 1 (Drosophila)	0	2.27	4.82323		9.74129	9.91727	9.63077	7.73844	7.36833	7.36035
10513195	Txn1	thioredoxin 1	0	2.27	4.82323		12.5434	12.6178	12.7156	10.3677	10.2265	10.4689
10452815	Xdh	xanthine dehydrogenase	0	2.27	4.82323		8.84127	8.56327	8.98703	6.50437	6.50866	6.56564
10559261	Cd81	CD81 antigen	0	2.26	4.78991		12.9971	13.1025	13.0628	10.8667	10.6426	10.8728
10361152	Gstp2	glutathione S-transferase, pi 2	0	2.26	4.78991		9.91213	10.0728	9.97089	7.81807	7.66302	7.68111
10545910	Pcyox1	prenylcysteine oxidase 1	0	2.26	4.78991		10.0575	10.1157	10.2204	7.77437	7.79747	8.0523
10521759	Slit2	slit homolog 2 (Drosophila)	0	2.26	4.78991		8.54952	8.96503	8.65867	6.41346	6.53618	6.42875
10408335	Aldh5a1	aldhehyde dehydrogenase family 5, subfamily A1	0	2.25	4.75683		8.95332	9.00309	8.90537	6.69824	6.75311	6.64679
10541670	C1rl	complement component 1, r subcomponent-like	0	2.25	4.75683		8.87519	8.62228	8.74716	6.81102	6.06249	6.62619
10385391	Cyfip2	cytoplasmic FMR1 interacting protein 2	0	2.25	4.75683		9.20088	9.55283	9.13717	7.1415	6.86299	7.14796
10510221	Gm3579	predicted gene 3579	0	2.25	4.75683		9.99803	9.95385	9.95452	7.88344	7.67657	7.60265
10580969	Got2	glutamate oxaloacetate transaminase 2, mitochondrial	0	2.25	4.75683		10.5086	10.5092	10.5208	8.40112	8.09895	8.28813
10411235	Iqgap2	IQ motif containing GTPase activating protein 2	0	2.25	4.75683		10.2013	10.2514	10.3046	8.0571	7.98961	7.95305
10385500	Irgm1	immunity-related GTPase family M member 1	0	2.25	4.75683		7.04508	7.33053	7.07163	4.73604	4.77636	5.17784
10452404	Nudt12	nudix (nucleoside diphosphate linked moiety X)-type motif 12	0	2.25	4.75683		9.28196	9.29513	9.49293	7.08707	7.27405	6.95764
10373027	Tspan31	tetraspanin 31	0	2.25	4.75683		11.3942	11.3682	11.3503	9.14633	9.06015	9.17073
10430319	Tst	thiosulfate sulfurtransferase, mitochondrial	0	2.25	4.75683		10.1071	10.3492	10.0953	8.01576	7.87573	7.92392
10387768	Acadvl	acyl-Coenzyme A dehydrogenase, very long chain	0	2.24	4.72397		10.4322	10.4596	10.4658	8.17108	8.25858	8.19427
10537157	Akr1b10	aldo-keto reductase family 1, member B10 (aldose reductase)	0	2.24	4.72397		9.0508	8.96091	9.15122	6.75417	6.79663	6.88965
10406663	Arsb	arylsulfatase B	0	2.24	4.72397		9.89025	10.0589	9.91998	7.71117	7.67598	7.77183
10478594	Ctsa	cathepsin A	0	2.24	4.72397		9.79507	9.87269	9.76243	7.56852	7.50417	7.6268
10349773	Klhdc8a	kelch domain containing 8A	0	2.24	4.72397		8.18917	8.65093	8.37009	6.18802	6.30027	5.99229
10552546	Klk1	kallikrein 1	0	2.24	4.72397		11.379	11.1687	10.941	8.99953	8.83308	8.94127
10502510	Lmo4	LIM domain only 4	0	2.24	4.72397		10.0846	10.1317	10.0433	7.9072	7.70394	7.93958
10607774	Mospd2	motile sperm domain containing 2	0	2.24	4.72397		8.26804	8.19032	8.35924	5.95178	6.04155	6.11647
10603837	Ndufb11	NADH dehydrogenase (ubiquinone) 1 beta subcomplex, 11	0	2.24	4.72397		9.95278	9.94365	9.93656	7.62631	7.65236	7.84711
10530615	Ociad2	OCIA domain containing 2	0	2.24	4.72397		9.54732	9.30995	9.38333	7.27563	7.1637	7.07569
10429968			0	2.24	4.72397		11.4231	11.379	10.8856	9.40265	9.08452	8.4844
10560624	Apoe	apolipoprotein E	0	2.23	4.69134		12.3842	12.5286	12.1158	10.2347	10.0554	10.0375
10350753	Glul	glutamate-ammonia ligase (glutamine synthetase)	0	2.23	4.69134		12.2411	12.3672	12.334	10.0159	9.94524	10.3013
10526363	Por	P450 (cytochrome) oxidoreductase	0	2.23	4.69134		10.7263	10.6102	10.8563	8.46123	8.44644	8.59555
10601449	Sh3bgrl	SH3-binding domain glutamic acid-rich protein like	0	2.23	4.69134		10.6633	10.731	10.659	8.40314	8.45045	8.50523
10538290	Snx10	sorting nexin 10	0	2.23	4.69134		8.92501	8.74461	9.09738	6.78439	6.73026	6.55785
10606658	Trmt2b	TRM2 tRNA methyltransferase 2 homolog B (S. cerevisiae)	0	2.23	4.69134		9.43183	9.27293	9.23689	6.97705	7.15489	7.12584
10578904	Cpe	carboxypeptidase E	0	2.22	4.65893		12.248	12.3901	12.4011	10.2184	10.0858	10.0878
10483163	Grb14	growth factor receptor bound protein 14	0	2.22	4.65893		9.19454	9.04953	9.13523	7.09025	6.69566	6.93385
10464583	Gstp1	glutathione S-transferase, pi 1	0	2.22	4.65893		12.0398	11.9645	11.9391	9.89085	9.61171	9.76707
10569014	Ifitm2	interferon induced transmembrane protein 2	0	2.22	4.65893		9.06638	9.28077	9.20507	7.2408	6.74454	6.90083
10487987	Lrrn4	leucine rich repeat neuronal 4	0	2.22	4.65893		8.95637	8.77561	9.21033	6.80392	6.74671	6.72477
10575497	Mtss1l	metastasis suppressor 1-like	0	2.22	4.65893		9.00871	9.72428	8.81783	7.11616	6.75638	7.02924
10568568	Oat	ornithine aminotransferase	0	2.22	4.65893		11.3249	11.4034	11.5136	9.20048	9.13187	9.26085
10608138	Ddx3y	DEAD (Asp-Glu-Ala-Asp) box polypeptide 3, Y-linked	0	2.21	4.62675		10.8159	10.9252	10.9905	8.60176	8.79111	8.70918
10354732	Hspd1	heat shock protein 1 (chaperonin)	0	2.21	4.62675		10.9184	10.9806	11.1898	8.77944	8.73311	8.94586
10561187	Mia1	melanoma inhibitory activity 1	0	2.21	4.62675		8.46106	8.3865	8.34027	6.04474	6.37314	6.14635
10440019	Tmem45a	transmembrane protein 45a	0	2.21	4.62675		7.89806	8.16903	8.49763	6.19702	5.84206	5.89935
10538939	Eif2ak3	eukaryotic translation initiation factor 2 alpha kinase 3	0	2.2	4.59479		9.11062	9.09883	9.13456	6.96042	6.79303	6.9784
10429515	Lynx1	Ly6/neurotoxin 1	0	2.2	4.59479		8.69592	8.5789	8.90763	6.59947	6.43357	6.53811
10539907	Tpra1	transmembrane protein, adipocyte asscociated 1	0	2.2	4.59479		9.81222	9.96433	9.59637	7.60833	7.48877	7.66876
10457054	Zadh2	zinc binding alcohol dehydrogenase, domain containing 2	0	2.2	4.59479		9.94151	10.0646	10.167	7.82705	7.92752	7.8328
10343927			0	2.2	4.59479		10.4712	10.5789	10.4294	8.19984	8.25135	8.41471
10350840	Angptl1	angiopoietin-like 1	0	2.19	4.56305		7.39256	7.14724	7.48238	5.15648	5.15143	5.14669
10460603	Efemp2	epidermal growth factor-containing fibulin-like extracellular matrix protein 2	0	2.19	4.56305		10.1957	10.3206	10.1018	7.95229	7.95596	8.14135
10449452	Fkbp5	FK506 binding protein 5	0	2.19	4.56305		11.2181	11.521	11.2204	9.08087	9.15561	9.16638
10430201	Myh9	myosin, heavy polypeptide 9, non-muscle	0	2.19	4.56305		9.90977	9.81063	9.73353	7.66184	7.61649	7.60519
10462630	Pank1	pantothenate kinase 1	0	2.19	4.56305		9.55464	8.86975	8.98339	7.17481	6.96603	6.68474
10506188	Pgm2	phosphoglucomutase 2	0	2.19	4.56305		10.0886	10.1185	10.0182	7.89169	7.93475	7.82159
10602599	Smc1a	structural maintenance of chromosomes 1A	0	2.19	4.56305		9.59986	9.4071	9.55086	7.30231	7.40333	7.27199
10593789	Etfa	electron transferring flavoprotein, alpha polypeptide	0	2.18	4.53154		11.2377	11.1702	11.4539	9.18933	8.88904	9.2362
10420030	Psme2	proteasome (prosome, macropain) 28 subunit, beta	0	2.18	4.53154		9.96743	10.0264	10.2506	7.91364	7.90293	7.88022
10395414	Tmem195	transmembrane protein 195	0	2.18	4.53154		8.00136	8.24916	8.09411	5.91459	6.08599	5.78951
10425999	Ttc38	tetratricopeptide repeat domain 38	0	2.18	4.53154		9.77317	9.76253	9.76376	7.47312	7.67726	7.59466
10490212	Ctsz	cathepsin Z	0	2.17	4.50023		10.7805	10.7223	10.8141	8.52803	8.58603	8.68063
10534102	Gusb	glucuronidase, beta	0	2.17	4.50023		9.38061	9.31456	9.38901	7.14752	7.1811	7.24432
10497321	Pgam1	phosphoglycerate mutase 1	0	2.17	4.50023		11.1894	11.0829	11.1244	8.93161	8.95765	9.01195
10548899	Rerg	RAS-like, estrogen-regulated, growth-inhibitor	0	2.17	4.50023		9.82621	10.1183	9.7949	7.51179	8.0053	7.72576
10375667	Rnf130	ring finger protein 130	0	2.17	4.50023		10.5297	10.7638	10.6365	8.42361	8.4509	8.54689
10469609			0	2.17	4.50023		7.98376	8.13624	7.77652	5.7979	5.73074	5.85777
10362294	Arhgap18	Rho GTPase activating protein 18	0	2.16	4.46915		10.1517	9.89426	10.0844	7.96933	7.84647	7.82065
10373950	Nipsnap1	4-nitrophenylphosphatase domain and non-neuronal SNAP25-like protein homolog 1 (C. elegans)	0	2.16	4.46915		8.94198	8.8789	9.02259	6.78598	6.78892	6.77372
10445325	Rcan2	regulator of calcineurin 2	0	2.16	4.46915		8.3797	8.67784	8.19329	6.39329	6.23812	6.1453
10425808	Tspo	translocator protein	0	2.16	4.46915		9.8963	9.85573	9.84976	7.56012	7.87636	7.67589
10341006			0.003	2.16	4.46915		5.61393	5.73399	5.41701	4.20738	3.78884	2.28729
10603485	Ebp	phenylalkylamine Ca2+ antagonist (emopamil) binding protein	0	2.15	4.43828		10.5738	10.4562	10.5106	8.30956	8.28614	8.50117
10486875	Frmd5	FERM domain containing 5	0	2.15	4.43828		8.93752	8.82309	9.11002	6.84349	6.79735	6.79438
10606301	Magt1	magnesium transporter 1	0	2.15	4.43828		10.37	10.2998	10.556	8.26684	8.20367	8.31275
10385511	Psme2	proteasome (prosome, macropain) 28 subunit, beta	0	2.15	4.43828		8.72412	8.56792	8.72215	6.41419	6.42364	6.71972
10378549	Rtn4rl1	reticulon 4 receptor-like 1	0	2.15	4.43828		9.70906	10.163	9.61046	7.73889	7.65683	7.64744
10412882	Thrb	thyroid hormone receptor beta	0	2.15	4.43828		8.40285	8.1709	7.99934	6.25877	6.00689	5.85507
10352320	Tmem63a	transmembrane protein 63a	0	2.15	4.43828		9.36522	9.54757	9.42607	7.25019	7.18452	7.46197
10558961	Tspan4	tetraspanin 4	0	2.15	4.43828		10.1259	10.4277	10.1753	8.02436	8.24496	8.0178
10606217	Abcb7	ATP-binding cassette, sub-family B (MDR/TAP), member 7	0	2.14	4.40762		9.23399	9.31559	9.51693	7.16698	7.25511	7.23456
10595840	Acpl2	acid phosphatase-like 2	0	2.14	4.40762		8.5371	8.7686	8.66839	6.27701	6.51321	6.75511
10604375	Apln	apelin	0	2.14	4.40762		9.52569	10.1695	9.92896	7.48077	7.86946	7.85985
10346747	Cyp20a1	cytochrome P450, family 20, subfamily A, polypeptide 1	0	2.14	4.40762		8.7805	8.77931	8.86051	6.77282	6.49543	6.7274
10457323	Mkx	mohawk homeobox	0	2.14	4.40762		8.44515	7.90105	8.07687	6.27404	5.84707	5.88625
10496110	Papss1	3'-phosphoadenosine 5'-phosphosulfate synthase 1	0	2.14	4.40762		9.53531	9.55338	9.58899	7.37601	7.29751	7.58525
10583021	Pdgfd	platelet-derived growth factor, D polypeptide	0	2.14	4.40762		8.94883	8.92459	8.74375	6.75286	6.7277	6.72056
10603087	Pir	pirin	0	2.14	4.40762		8.62471	8.59117	8.60044	6.29511	6.56791	6.52647
10463355	Scd2	stearoyl-Coenzyme A desaturase 2	0	2.14	4.40762		12.9392	12.9823	12.9935	10.9655	10.7122	10.8138
10587284	Elovl5	ELOVL family member 5, elongation of long chain fatty acids (yeast)	0	2.13	4.37717		12.8157	12.7561	12.8815	10.6629	10.5816	10.8097
10538547	Fkbp9	FK506 binding protein 9	0	2.13	4.37717		10.4219	10.4547	10.4388	8.34208	8.18919	8.40488
10501222	Gstm2	glutathione S-transferase, mu 2	0	2.13	4.37717		12.5159	12.4547	12.357	10.4735	10.2428	10.2344
10434806	Lpp	LIM domain containing preferred translocation partner in lipoma	0	2.13	4.37717		9.43535	9.75362	9.5457	7.3446	7.6417	7.35123
10543134	Ndufa4	NADH dehydrogenase (ubiquinone) 1 alpha subcomplex, 4	0	2.13	4.37717		11.5984	11.7491	11.6337	9.44627	9.45218	9.68744
10589511	Scap	SREBF chaperone	0	2.13	4.37717		10.7513	10.9228	10.6295	8.61	8.62518	8.68735
10373768	Selm	selenoprotein M	0	2.13	4.37717		8.89157	8.72062	8.56137	6.42175	6.5933	6.76057
10428536	Trps1	trichorhinophalangeal syndrome I (human)	0	2.13	4.37717		8.23162	8.23595	8.1898	6.23476	6.21725	5.80142
10543333	Aass	aminoadipate-semialdehyde synthase	0	2.12	4.34694		8.93371	8.93501	9.14711	6.86075	6.9253	6.86945
10604405	Aifm1	apoptosis-inducing factor, mitochondrion-associated 1	0	2.12	4.34694		10.1825	10.1129	10.2815	8.18416	7.97998	8.05939
10417273	Esd	esterase D/formylglutathione hydrolase	0	2.12	4.34694		9.93008	9.91343	10.1238	7.94577	7.86248	7.79022
10549097	Ldhb	lactate dehydrogenase B	0	2.12	4.34694		11.2805	11.3059	11.2297	9.16662	9.09681	9.19076
10547100	Plxnd1	plexin D1	0	2.12	4.34694		9.43202	9.65292	9.16427	7.45321	7.22266	7.21655
10485198	Tspan18	tetraspanin 18	0	2.12	4.34694		8.31633	9.48563	8.36335	6.5594	6.5313	6.72095
10607952	Vamp7	vesicle-associated membrane protein 7	0	2.12	4.34694		8.86711	8.83239	9.01785	6.88364	6.81288	6.67104
10500685	Atp1a1	ATPase, Na+/K+ transporting, alpha 1 polypeptide	0	2.11	4.31691		12.1373	12.1912	12.2465	10.1526	9.99084	10.0869
10475414	B2m	beta-2 microglobulin	0	2.11	4.31691		12.5083	12.5533	12.7429	10.5109	10.3985	10.5571
10603026	Ctps2	cytidine 5'-triphosphate synthase 2	0	2.11	4.31691		9.35206	9.275	9.43446	7.25071	7.29472	7.1734
10444780	H2-D1	histocompatibility 2, D region locus 1	0	2.11	4.31691		10.3166	10.6413	10.7388	8.33768	8.43954	8.60398
10500559	Hsd3b6	hydroxy-delta-5-steroid dehydrogenase, 3 beta- and steroid delta-isomerase 6	0	2.11	4.31691		13.0246	12.7329	12.96	11.1044	10.6297	10.6393
10572647	Slc27a1	solute carrier family 27 (fatty acid transporter), member 1	0	2.11	4.31691		11.1506	11.2269	11.0583	8.9238	9.09944	9.08082
10504002	Spink4	serine peptidase inhibitor, Kazal type 4	0	2.11	4.31691		9.37754	9.34967	9.18805	7.12212	7.16005	7.29585
10600504	Fundc2	FUN14 domain containing 2	0	2.1	4.28709		8.03018	7.8779	8.08007	5.77851	5.88825	6.02417
10526055	Gbas	glioblastoma amplified sequence	0	2.1	4.28709		10.992	10.8739	10.9354	8.83027	8.92375	8.73423
10600390	Gdi1	guanosine diphosphate (GDP) dissociation inhibitor 1	0	2.1	4.28709		9.79696	9.83277	9.92987	7.75121	7.73226	7.77267
10483110	Ifih1	interferon induced with helicase C domain 1	0	2.1	4.28709		8.05888	8.06639	8.31375	6.1474	6.06151	5.9418
10438708	Masp1	mannan-binding lectin serine peptidase 1	0	2.1	4.28709		8.41404	8.54625	7.95803	6.5973	6.21697	5.80596
10513320	Ptgr1	prostaglandin reductase 1	0	2.1	4.28709		10.5199	10.8363	10.7496	8.52476	8.61029	8.67458
10499854	S100a1	S100 calcium binding protein A1	0	2.1	4.28709		9.39419	9.52973	9.30446	7.28996	7.19894	7.43398
10386683	Slc47a1	solute carrier family 47, member 1	0	2.1	4.28709		8.92743	8.7904	8.7597	6.76958	6.64779	6.749
10554693	Stard5	StAR-related lipid transfer (START) domain containing 5	0	2.1	4.28709		10.1954	9.94314	10.6002	8.13786	8.01666	8.27511
10473356	Ube2l6	ubiquitin-conjugating enzyme E2L 6	0	2.1	4.28709		8.24572	8.39479	8.38827	6.33639	6.13938	6.26385
10598664	Atp6ap2	ATPase, H+ transporting, lysosomal accessory protein 2	0	2.09	4.25748		10.0969	10.2273	10.3399	8.01116	8.13742	8.25392
10355464	Pecr	peroxisomal trans-2-enoyl-CoA reductase	0	2.09	4.25748		8.15146	7.91411	8.09581	6.0297	5.94204	5.91086
10595680	Tbc1d2b	TBC1 domain family, member 2B	0	2.09	4.25748		8.75899	8.99249	8.51035	6.60318	6.76009	6.62125
10340602			0	2.09	4.25748		11.6985	11.7921	11.6978	9.61322	9.51167	9.80794
10458960	Aldh7a1	aldehyde dehydrogenase family 7, member A1	0	2.08	4.22807		11.8213	11.8029	11.8133	9.62962	9.69446	9.87796
10428081	Hrsp12	heat-responsive protein 12	0	2.08	4.22807		8.37332	8.64896	8.67254	6.49765	6.45428	6.50297
10375240	Hspd1	heat shock protein 1 (chaperonin)	0	2.08	4.22807		11.4348	11.5043	11.6879	9.45914	9.33767	9.57763
10593449	Layn	layilin	0	2.08	4.22807		8.5678	8.66224	8.13824	6.4875	6.14482	6.50117
10399379	Pgk1	phosphoglycerate kinase 1	0	2.08	4.22807		10.5318	10.5158	10.6908	8.35251	8.51143	8.62292
10498313	Pgk1	phosphoglycerate kinase 1	0	2.08	4.22807		10.5318	10.5158	10.6908	8.35251	8.51143	8.62292
10387791	Slc16a13	solute carrier family 16 (monocarboxylic acid transporters), member 13	0	2.08	4.22807		9.24297	9.45416	9.33019	7.22055	7.20948	7.3721
10493709	Slc39a1	solute carrier family 39 (zinc transporter), member 1	0	2.08	4.22807		10.6798	10.6829	10.8751	8.71284	8.48772	8.78779
10385572	Sqstm1	sequestosome 1	0	2.08	4.22807		12.0937	12.1593	12.2479	10.0982	10.0961	10.0549
10461214	Tmem223	transmembrane protein 223	0	2.08	4.22807		10.6505	10.6043	10.7901	8.48521	8.47255	8.85495
10344297			0.01	2.08	4.22807		6.04832	6.48721	4.9959	4.77684	3.63468	2.87162
10464560	Aldh3b1	aldehyde dehydrogenase 3 family, member B1	0	2.07	4.19887		10.1493	10.1045	10.095	8.25685	7.94889	7.93208
10586933	Nedd4	neural precursor cell expressed, developmentally down-regulated 4	0	2.07	4.19887		12.1247	12.1826	12.1421	10.1348	10.0239	10.0891
10463168	Pgam1	phosphoglycerate mutase 1	0	2.07	4.19887		11.1236	10.9764	11.1187	8.9918	9.00385	9.02734
10561302	Pgam1	phosphoglycerate mutase 1	0	2.07	4.19887		11.1236	10.9764	11.1187	8.9918	9.00385	9.02734
10601390	Pgk1	phosphoglycerate kinase 1	0	2.07	4.19887		10.5185	10.5047	10.6763	8.35475	8.50782	8.63976
10541895	Tnfrsf1a	tumor necrosis factor receptor superfamily, member 1a	0	2.07	4.19887		10.2077	10.54	10.2645	8.20326	8.28941	8.30656
10576639	Nrp1	neuropilin 1	0	2.06	4.16986		9.07837	8.63057	8.86586	6.90814	6.59782	6.90002
10495794	Pde5a	phosphodiesterase 5A, cGMP-specific	0	2.06	4.16986		8.35775	8.25039	8.55108	6.39424	6.2105	6.37493
10499348	Tmem79	transmembrane protein 79	0	2.06	4.16986		8.50958	9.38402	8.5907	6.61433	6.76374	6.91455
10375941	Vdac1	voltage-dependent anion channel 1	0	2.06	4.16986		10.5064	10.4114	10.6036	8.46932	8.4558	8.41432
10516596	Zbtb8b	zinc finger and BTB domain containing 8b	0	2.06	4.16986		8.39637	8.5488	8.52288	6.48479	6.37632	6.43696
10425623	Csdc2	cold shock domain containing C2, RNA binding	0	2.05	4.14106		8.87778	9.12753	8.67174	6.88293	6.77171	6.87558
10604187	Lamp2	lysosomal-associated membrane protein 2	0	2.05	4.14106		11.5975	11.6666	11.6935	9.53816	9.62705	9.63688
10518570	Pgd	phosphogluconate dehydrogenase	0	2.05	4.14106		10.979	10.6645	11.0033	8.80674	8.74004	8.94086
10465395	Ppp2r5b	protein phosphatase 2, regulatory subunit B (B56), beta isoform	0	2.05	4.14106		8.49827	9.17266	8.56521	6.5676	6.87808	6.64626
10484463	Serping1	serine (or cysteine) peptidase inhibitor, clade G, member 1	0	2.05	4.14106		11.1688	11.5686	11.342	9.32523	9.37942	9.21634
10595664	Tmed3	transmembrane emp24 domain containing 3	0	2.05	4.14106		10.915	11.0596	10.9997	8.85273	8.88251	9.09505
10383152			0	2.05	4.14106		8.99086	9.29572	9.22099	7.13727	7.08542	7.13096
10520638	0610007C21Rik	RIKEN cDNA 0610007C21 gene	0	2.04	4.11246		11.7491	11.7118	11.7581	9.6738	9.68544	9.7431
10397145	Acot2	acyl-CoA thioesterase 2	0	2.04	4.11246		9.05645	9.35236	9.20012	7.58851	7.08912	6.80162
10557816	Bckdk	branched chain ketoacid dehydrogenase kinase	0	2.04	4.11246		10.2613	10.1695	10.1378	8.13069	8.13869	8.16597
10569168	Slc25a22	solute carrier family 25 (mitochondrial carrier, glutamate), member 22	0	2.04	4.11246		8.19247	8.7507	8.36261	6.45515	6.31486	6.42361
10544002	Creb3l2	cAMP responsive element binding protein 3-like 2	0	2.03	4.08405		8.51982	8.81003	8.45628	6.61	6.58868	6.49224
10599174	Il13ra1	interleukin 13 receptor, alpha 1	0	2.03	4.08405		8.61775	8.73611	8.59735	6.64559	6.53357	6.66809
10514668	Jak1	Janus kinase 1	0	2.03	4.08405		11.3486	11.544	11.427	9.42394	9.39132	9.41185
10562480	Nudt19	nudix (nucleoside diphosphate linked moiety X)-type motif 19	0	2.03	4.08405		9.45522	9.56214	9.49992	7.60508	7.48979	7.33989
10460400	Pcx	pyruvate carboxylase	0	2.03	4.08405		10.5634	10.4713	10.6452	8.5012	8.55852	8.54225
10587818	Plscr4	phospholipid scramblase 4	0	2.03	4.08405		9.10041	8.99812	9.06422	6.93265	7.11447	7.01707
10396608	Syne2	synaptic nuclear envelope 2	0	2.03	4.08405		11.0656	10.9235	10.8262	9.02748	8.76497	8.91852
10606858	Tceal8	transcription elongation factor A (SII)-like 8	0	2.03	4.08405		9.63907	9.68319	9.78098	7.67902	7.57888	7.76487
10379489	Tmem98	transmembrane protein 98	0	2.03	4.08405		9.17202	9.05041	9.03439	7.15874	6.94361	7.06078
10603651	1810030O07Rik	RIKEN cDNA 1810030O07 gene	0	2.02	4.05584		8.40775	8.3141	8.55651	6.35628	6.40044	6.45582
10408331	Acot13	acyl-CoA thioesterase 13	0	2.02	4.05584		9.20959	9.30109	9.19082	7.21586	7.08398	7.34288
10466925	Ak3	adenylate kinase 3	0	2.02	4.05584		10.8092	10.8968	10.7059	8.80394	8.81542	8.743
10430956	Cyb5r3	cytochrome b5 reductase 3	0	2.02	4.05584		11.3862	11.2996	11.332	9.37663	9.35612	9.21369
10598723	Ddx3x	DEAD/H (Asp-Glu-Ala-Asp/His) box polypeptide 3, X-linked	0	2.02	4.05584		11.4584	11.6366	11.5316	9.48696	9.48563	9.58047
10507539	Elovl1	elongation of very long chain fatty acids (FEN1/Elo2, SUR4/Elo3, yeast)-like 1	0	2.02	4.05584		9.67761	9.70239	9.71138	7.5276	7.75544	7.75148
10587315	Gsta4	glutathione S-transferase, alpha 4	0	2.02	4.05584		12.4237	12.397	12.4019	10.5178	10.2995	10.3585
10498952	Gucy1a3	guanylate cyclase 1, soluble, alpha 3	0	2.02	4.05584		8.74597	8.53685	8.6428	7.01868	6.52413	6.31324
10421258	Pdlim2	PDZ and LIM domain 2	0	2.02	4.05584		9.10881	9.26917	9.04612	7.12991	7.05645	7.18321
10603373	Pqbp1	polyglutamine binding protein 1	0	2.02	4.05584		9.86274	9.75353	9.86339	7.67776	7.83851	7.89255
10388430	Serpinf1	serine (or cysteine) peptidase inhibitor, clade F, member 1	0	2.02	4.05584		9.82406	9.21985	9.30328	7.53881	7.28116	7.47086
10521824	Sod3	superoxide dismutase 3, extracellular	0	2.02	4.05584		9.24077	9.18282	9.14715	7.25477	7.04812	7.20324
10340428			0	2.02	4.05584		10.516	10.5792	10.4533	8.53883	8.47554	8.47808
10403291	Akr1c14	aldo-keto reductase family 1, member C14	0	2.01	4.02782		7.70276	7.47241	7.45352	5.7043	5.43879	5.45126
10495896	Camk2d	calcium/calmodulin-dependent protein kinase II, delta	0	2.01	4.02782		8.89739	8.88205	8.89726	6.94242	6.97038	6.7365
10603708	Cask	calcium/calmodulin-dependent serine protein kinase (MAGUK family)	0	2.01	4.02782		8.8438	8.91823	8.86114	6.8068	6.99371	6.7916
10381154	Cnp	2',3'-cyclic nucleotide 3' phosphodiesterase	0	2.01	4.02782		9.23875	9.35307	9.35287	7.27686	7.29879	7.33197
10392894	Fads6	fatty acid desaturase domain family, member 6	0	2.01	4.02782		9.99374	9.9967	9.92365	7.85593	7.99172	8.03288
10455961	Iigp1	interferon inducible GTPase 1	0	2.01	4.02782		6.69177	7.04493	7.55648	4.97142	5.04657	5.25668
10386189	Olfr330	olfactory receptor 330	0	2.01	4.02782		7.96739	7.8306	7.9326	5.97151	5.53816	6.2042
10417183	Pcca	propionyl-Coenzyme A carboxylase, alpha polypeptide	0	2.01	4.02782		10.762	10.8006	10.8535	8.68186	8.87409	8.81817
10591643	Rab3d	RAB3D, member RAS oncogene family	0	2.01	4.02782		8.70057	8.87468	8.62827	6.56977	6.89745	6.71365
10398052	Serpina3h	serine (or cysteine) peptidase inhibitor, clade A, member 3H	0	2.01	4.02782		7.76276	8.03903	7.76517	5.4757	6.06896	5.9824
10383202			0	2.01	4.02782		9.39417	9.98701	9.66882	7.69838	7.76525	7.54994
10498710	Bche	butyrylcholinesterase	0	2	4		7.26749	7.10301	7.22347	5.2268	5.18827	5.17035
10542156	Clec2d	C-type lectin domain family 2, member d	0	2	4		8.19575	7.93554	7.90676	5.86407	6.10614	6.06642
10501164	Csf1	colony stimulating factor 1 (macrophage)	0	2	4		8.20607	8.58704	8.04867	6.23019	6.60458	6.02077
10465553	Fkbp2	FK506 binding protein 2	0	2	4		11.5112	11.6866	11.5396	9.42075	9.5103	9.79252
10585194	Il18	interleukin 18	0	2	4		7.34335	7.40725	7.48478	5.26421	5.42843	5.55315
10506050	Nfia	nuclear factor I/A	0	2	4		8.99254	9.55958	9.16848	7.19223	7.35741	7.15611
10349711	Slc41a1	solute carrier family 41, member 1	0	2	4		10.333	10.943	10.316	8.49975	8.52129	8.57894
10572747	Tpm4	tropomyosin 4	0	2	4		10.1848	9.95637	10.2737	8.36696	8.10771	7.92531
10442396	Abca3	ATP-binding cassette, sub-family A (ABC1), member 3	0	1.99	3.97237		9.28597	9.37388	9.29348	7.33349	7.18033	7.45799
10553015	Bcat2	branched chain aminotransferase 2, mitochondrial	0	1.99	3.97237		10.5736	10.6013	10.5741	8.69658	8.60479	8.47847
10551836	Cox7a1	cytochrome c oxidase, subunit VIIa 1	0	1.99	3.97237		9.06915	9.2677	8.76578	7.16801	6.87782	7.09719
10605740	Eif2s3x	eukaryotic translation initiation factor 2, subunit 3, structural gene X-linked	0	1.99	3.97237		10.0803	10.0874	10.2513	8.0739	8.16237	8.21826
10404053	Hist1h2bc	histone cluster 1, H2bc	0	1.99	3.97237		10.2441	9.90704	10.3306	8.37326	7.92848	8.20287
10599335	Mcts1	malignant T cell amplified sequence 1	0	1.99	3.97237		7.29793	7.60071	7.74351	5.57837	5.53177	5.55048
10532828	Mmab	methylmalonic aciduria (cobalamin deficiency) type B homolog (human)	0	1.99	3.97237		8.90051	8.47507	8.92321	6.87095	6.59642	6.8518
10360848	Mosc2	MOCO sulphurase C-terminal domain containing 2	0	1.99	3.97237		10.3391	10.4539	10.363	8.39369	8.30551	8.49708
10466110	Ms4a10	membrane-spanning 4-domains, subfamily A, member 10	0	1.99	3.97237		8.8431	8.84073	8.66222	6.90536	6.73796	6.74567
10574018	Mt3	metallothionein 3	0	1.99	3.97237		10.6997	10.5494	10.3485	8.66043	8.30048	8.67712
10358259	Nek7	NIMA (never in mitosis gene a)-related expressed kinase 7	0	1.99	3.97237		9.6379	9.38974	9.52558	7.57954	7.48104	7.5122
10564527	Nr2f2	nuclear receptor subfamily 2, group F, member 2	0	1.99	3.97237		9.55305	9.67589	9.44896	7.63733	7.43278	7.63583
10425987	Ppara	peroxisome proliferator activated receptor alpha	0	1.99	3.97237		8.37418	8.52443	8.29856	6.59682	6.34004	6.29253
10470948	Slc39a1	solute carrier family 39 (zinc transporter), member 1	0	1.99	3.97237		9.58849	9.63386	9.59577	7.50309	7.66252	7.69094
10386473	Srebf1	sterol regulatory element binding transcription factor 1	0	1.99	3.97237		9.59805	9.64852	9.51992	7.72569	7.62407	7.45062
10429160	St3gal1	ST3 beta-galactoside alpha-2,3-sialyltransferase 1	0	1.99	3.97237		8.43652	8.86907	8.75428	6.56643	6.76942	6.7606
10602020	Tbc1d8b	TBC1 domain family, member 8B	0	1.99	3.97237		8.59548	8.67213	8.65338	6.63576	6.62355	6.68838
10579996	Tecr	trans-2,3-enoyl-CoA reductase	0	1.99	3.97237		12.1152	12.051	12.0416	10.1078	9.95491	10.1759
10517328	Tmem50a	transmembrane protein 50A	0	1.99	3.97237		11.8085	11.8313	11.8853	9.84014	9.74976	9.96817
10342545			0	1.99	3.97237		11.6457	11.5314	11.5754	9.69398	9.5402	9.54016
10339812			0	1.99	3.97237		10.8839	10.8052	10.9428	8.97531	8.81937	8.87277
10483756	Atp5g3	ATP synthase, H+ transporting, mitochondrial F0 complex, subunit C3 (subunit 9)	0	1.98	3.94493		12.2495	12.3045	12.3192	10.2471	10.2404	10.4478
10600512	Brcc3	BRCA1/BRCA2-containing complex, subunit 3	0	1.98	3.94493		8.89899	8.85974	9.08759	6.91431	6.86666	7.11524
10528102	Crot	carnitine O-octanoyltransferase	0	1.98	3.94493		10.5283	10.4863	10.6306	8.57858	8.51725	8.61001
10505998	Fggy	FGGY carbohydrate kinase domain containing	0	1.98	3.94493		8.42976	8.57147	8.51532	6.62535	6.46939	6.48587
10450075	H2-K1	histocompatibility 2, K1, K region	0	1.98	3.94493		11.6024	11.7275	11.8097	9.71811	9.72061	9.75856
10607283	Maged2	melanoma antigen, family D, 2	0	1.98	3.94493		9.82886	9.88554	9.76216	7.85381	7.89511	7.78779
10604100	Ndufa1	NADH dehydrogenase (ubiquinone) 1 alpha subcomplex, 1	0	1.98	3.94493		10.0699	10.2156	10.0565	7.94686	8.12167	8.33532
10605437	Pls3	plastin 3 (T-isoform)	0	1.98	3.94493		9.97805	9.80075	10.0955	7.96956	7.99764	7.96625
10598389	Wdr45	WD repeat domain 45	0	1.98	3.94493		9.18823	9.16935	9.02134	7.21506	7.11441	7.11086
10383198			0	1.98	3.94493		9.2009	9.65971	9.41615	7.45636	7.57873	7.30517
10536494	Cav2	caveolin 2	0	1.97	3.91768		7.7783	7.8972	7.70748	5.76204	5.89685	5.82825
10416843	Cln5	ceroid-lipofuscinosis, neuronal 5	0	1.97	3.91768		8.79378	8.63033	8.85029	6.72374	6.57687	7.06944
10562059	Cox6b1	cytochrome c oxidase, subunit VIb polypeptide 1	0	1.97	3.91768		10.4748	10.516	10.3555	8.33506	8.44127	8.67208
10357242	Dbi	diazepam binding inhibitor	0	1.97	3.91768		11.6606	11.6203	11.6755	9.75364	9.62671	9.68047
10362499	Frk	fyn-related kinase	0	1.97	3.91768		7.37294	7.49296	7.36727	5.32458	5.73028	5.2643
10600857	Heph	hephaestin	0	1.97	3.91768		7.89906	7.89401	7.76447	6.10116	5.64183	5.89981
10394082	Hexdc	hexosaminidase (glycosyl hydrolase family 20, catalytic domain) containing	0	1.97	3.91768		8.53475	8.52554	8.62279	6.57279	6.48447	6.73007
10462035	Ldhb	lactate dehydrogenase B	0	1.97	3.91768		10.9262	10.9897	10.9667	8.92465	8.97961	9.05753
10415065	Lrp10	low-density lipoprotein receptor-related protein 10	0	1.97	3.91768		9.8038	10.0066	9.8232	7.9521	7.85682	7.92283
10480145	Rsu1	Ras suppressor protein 1	0	1.97	3.91768		9.86991	9.82157	9.89441	7.88378	7.95623	7.82208
10421387	Sftpc	surfactant associated protein C	0	1.97	3.91768		7.82207	7.8862	7.74003	5.76806	5.66805	6.08784
10396606	Syne2	synaptic nuclear envelope 2	0	1.97	3.91768		10.9933	10.885	10.7347	8.97521	8.84333	8.87819
10367744			0.026	1.97	3.91768		6.57325	8.53906	6.71561	5.70208	5.61836	4.60123
10582658	Agt	angiotensinogen (serpin peptidase inhibitor, clade A, member 8)	0	1.96	3.89062		13.4716	13.4555	13.481	11.6503	11.3698	11.4939
10408902	Ccdc90a	coiled-coil domain containing 90A	0	1.96	3.89062		8.16669	8.29314	8.3195	6.32093	6.12947	6.44604
10587194	Gnb5	guanine nucleotide binding protein (G protein), beta 5	0	1.96	3.89062		8.88851	8.95791	9.10328	6.96886	6.98039	7.11825
10467139	Lipa	lysosomal acid lipase A	0	1.96	3.89062		9.20755	9.39761	9.38005	7.34003	7.25128	7.52467
10405058	Omd	osteomodulin	0	1.96	3.89062		6.57065	6.50033	6.64773	4.66764	4.6263	4.54949
10522503	Pdgfra	platelet derived growth factor receptor, alpha polypeptide	0	1.96	3.89062		10.5312	10.6226	10.2314	8.51345	8.47381	8.50684
10506488	Ppap2b	phosphatidic acid phosphatase type 2B	0	1.96	3.89062		11.3451	10.9376	11.1035	9.30061	9.00904	9.18406
10476314	Prnp	prion protein	0	1.96	3.89062		9.85432	9.93342	10.1916	7.95666	7.97613	8.15495
10512514	Tln1	talin 1	0	1.96	3.89062		9.92326	10.1215	10.0277	8.09219	8.03737	8.07101
10340969			0	1.96	3.89062		11.6789	11.789	11.8452	9.97338	9.58461	9.88255
10405380	Fgfr4	fibroblast growth factor receptor 4	0	1.95	3.86375		8.96642	9.13262	8.98741	7.15966	7.06374	7.01715
10344966	Ly96	lymphocyte antigen 96	0	1.95	3.86375		7.42103	7.5257	7.79027	5.49683	5.55429	5.84471
10411532	Mccc2	methylcrotonoyl-Coenzyme A carboxylase 2 (beta)	0	1.95	3.86375		9.8495	10.0143	9.87367	7.99433	7.91973	7.96739
10526381	Mdh2	malate dehydrogenase 2, NAD (mitochondrial)	0	1.95	3.86375		11.9187	11.8184	11.928	10.0357	9.93758	9.84363
10523190	Parm1	prostate androgen-regulated mucin-like protein 1	0	1.95	3.86375		8.79236	8.84031	8.70428	6.86123	6.75979	6.85752
10439710	Phldb2	pleckstrin homology-like domain, family B, member 2	0	1.95	3.86375		8.33323	8.15975	8.1842	6.4126	6.15373	6.26502
10499529	Rag1ap1	recombination activating gene 1 activating protein 1	0	1.95	3.86375		9.43007	9.30901	9.42417	7.3753	7.40768	7.51739
10589350	Shisa5	shisa homolog 5 (Xenopus laevis)	0	1.95	3.86375		10.1133	10.1641	10.0653	8.08643	8.15619	8.23805
10359161	Soat1	sterol O-acyltransferase 1	0	1.95	3.86375		12.1166	12.2018	12.3329	10.2594	10.2285	10.3271
10396485	Syne2	synaptic nuclear envelope 2	0	1.95	3.86375		10.5182	10.3025	10.2291	8.32289	8.53055	8.36059
10340309			0.01	1.95	3.86375		6.42451	7.55179	7.29777	4.61528	6.14071	4.66022
10422280	Abcc4	ATP-binding cassette, sub-family C (CFTR/MRP), member 4	0	1.94	3.83706		9.06347	9.14451	9.19449	7.15079	7.15984	7.28617
10521626	Cc2d2a	coiled-coil and C2 domain containing 2A	0	1.94	3.83706		7.56878	8.00205	7.68029	5.92905	5.75441	5.73751
10541075	Cxcl12	chemokine (C-X-C motif) ligand 12	0	1.94	3.83706		8.81717	8.84013	8.5871	6.50785	6.94708	6.97446
10553598	Cyfip1	cytoplasmic FMR1 interacting protein 1	0	1.94	3.83706		10.1089	10.0922	10.2	8.33092	8.11548	8.13787
10449955	Cyp4f13	cytochrome P450, family 4, subfamily f, polypeptide 13	0	1.94	3.83706		8.68196	8.6467	8.61567	6.6773	6.78768	6.67272
10492310	Mbnl1	muscleblind-like 1 (Drosophila)	0	1.94	3.83706		10.8452	10.7017	10.899	8.90341	8.94283	8.77827
10367400	Mmp19	matrix metallopeptidase 19	0	1.94	3.83706		8.00252	7.86729	7.87697	5.99503	5.93285	5.99614
10589368	Plxnb1	plexin B1	0	1.94	3.83706		9.26373	9.5549	9.30446	7.35372	7.44028	7.49676
10593325	Pts	6-pyruvoyl-tetrahydropterin synthase	0	1.94	3.83706		8.80722	8.49236	8.62598	6.55266	6.72435	6.82457
10349922	Ren1	renin 1 structural	0.001	1.94	3.83706		8.60788	8.01635	8.46639	6.58489	6.16506	6.52271
10575153	Cyb5b	cytochrome b5 type B	0	1.93	3.81055		11.7724	11.7625	11.7312	9.79412	9.88845	9.78662
10480699	Dpp7	dipeptidylpeptidase 7	0	1.93	3.81055		8.17404	8.0368	8.20137	6.23455	6.17462	6.21418
10392183	Ern1	endoplasmic reticulum (ER) to nucleus signalling 1	0	1.93	3.81055		9.75881	9.6631	9.65596	7.82999	7.67686	7.78775
10420023	Fam158a	family with sequence similarity 158, member A	0	1.93	3.81055		8.75783	8.78564	8.69662	6.80264	6.71521	6.92223
10573583	Man2b1	mannosidase 2, alpha B1	0	1.93	3.81055		10.8676	10.7683	10.8906	8.94285	8.83285	8.94635
10430834	Naga	N-acetyl galactosaminidase, alpha	0	1.93	3.81055		10.5108	10.5612	10.4647	8.63546	8.5162	8.58763
10373036	Os9	amplified in osteosarcoma	0	1.93	3.81055		11.0276	11.125	11.0851	9.10188	9.26463	9.09587
10339963			0	1.93	3.81055		10.9034	10.9208	11.1722	9.11686	9.02414	9.07371
10435789			0	1.93	3.81055		9.55178	9.99563	9.62663	7.68827	7.82548	7.86042
10339287			0.002	1.93	3.81055		5.93377	6.58238	6.15155	3.82683	5.38553	3.66472
10490302	2810021G02Rik	RIKEN cDNA 2810021G02 gene	0	1.92	3.78423		5.38924	5.14781	5.39824	3.41716	3.51041	3.23798
10382271	Arsg	arylsulfatase G	0	1.92	3.78423		9.05651	9.02747	8.96951	7.12001	7.11556	7.04938
10485213	Cd82	CD82 antigen	0	1.92	3.78423		11.6211	11.6808	11.6679	9.69059	9.66476	9.84793
10505982	Fggy	FGGY carbohydrate kinase domain containing	0	1.92	3.78423		9.00697	9.13345	9.06852	7.13257	7.34046	6.97474
10363173	Gja1	gap junction protein, alpha 1	0	1.92	3.78423		11.4471	11.2094	11.6149	9.51491	9.42972	9.5718
10544114	Hipk2	homeodomain interacting protein kinase 2	0	1.92	3.78423		9.68966	10.1136	9.80207	7.9689	8.04153	7.82204
10600973	Igbp1	immunoglobulin (CD79A) binding protein 1	0	1.92	3.78423		9.61223	9.34888	9.64565	7.60237	7.60732	7.64355
10520362	Insig1	insulin induced gene 1	0	1.92	3.78423		11.0141	10.7106	11.2689	8.92157	9.14307	9.15984
10564795	Plin1	perilipin 1	0	1.92	3.78423		8.78958	8.41421	8.94083	6.79247	6.70281	6.88524
10393559	Timp2	tissue inhibitor of metalloproteinase 2	0	1.92	3.78423		12.3763	12.4144	12.2806	10.5595	10.285	10.4591
10497045			0	1.92	3.78423		8.21222	8.17221	8.21805	6.27356	6.20263	6.36606
10383168			0	1.92	3.78423		9.09315	9.57723	9.33914	7.33133	7.54487	7.37692
10397148	Acot1	acyl-CoA thioesterase 1	0	1.91	3.75809		7.74687	7.46982	7.56394	5.63743	5.43731	5.97024
10374083	Aebp1	AE binding protein 1	0	1.91	3.75809		8.52046	9.69347	8.74162	6.99767	7.01151	7.22785
10466606	Anxa1	annexin A1	0	1.91	3.75809		8.55843	8.30315	8.74299	6.56042	6.76297	6.54385
10404686	Bmp6	bone morphogenetic protein 6	0	1.91	3.75809		8.55305	9.02473	8.56579	6.57108	7.08655	6.76289
10568785	Bnip3	BCL2/adenovirus E1B interacting protein 3	0	1.91	3.75809		9.8095	9.94716	9.71792	8.00264	7.99747	7.73614
10426812	Gpd1	glycerol-3-phosphate dehydrogenase 1 (soluble)	0	1.91	3.75809		10.2535	10.0224	10.3412	8.26923	8.28824	8.31831
10412466	Hmgcs1	3-hydroxy-3-methylglutaryl-Coenzyme A synthase 1	0	1.91	3.75809		11.8328	11.6653	12.2286	9.98745	10.0161	9.99021
10394914	Iah1	isoamyl acetate-hydrolyzing esterase 1 homolog (S. cerevisiae)	0	1.91	3.75809		10.5707	10.4779	10.4448	8.54792	8.70151	8.5023
10571444	Slc7a2	solute carrier family 7 (cationic amino acid transporter, y+ system), member 2	0	1.91	3.75809		9.81565	9.93046	9.98562	7.70275	8.25725	8.03235
10441813	Snora20	small nucleolar RNA, H/ACA box 20	0	1.91	3.75809		8.05023	8.44854	7.99006	5.85447	6.46151	6.43579
10433445	Abat	4-aminobutyrate aminotransferase	0	1.9	3.73213		11.2709	11.0942	11.2482	9.3766	9.29435	9.23541
10488482	Acss1	acyl-CoA synthetase short-chain family member 1	0	1.9	3.73213		10.0965	9.88829	9.98137	8.14921	8.16642	7.95545
10605081	Bcap31	B-cell receptor-associated protein 31	0	1.9	3.73213		10.3653	10.4026	10.3896	8.41521	8.52046	8.52042
10571696	Casp3	caspase 3	0	1.9	3.73213		8.26684	8.40846	8.56063	6.4381	6.49482	6.59206
10517165	Cd52	CD52 antigen	0	1.9	3.73213		7.66854	7.95149	7.58076	5.94925	5.56955	5.99101
10414093	Glud1	glutamate dehydrogenase 1	0	1.9	3.73213		10.6229	10.623	10.6373	8.82718	8.64771	8.7025
10450694	H2-T22	histocompatibility 2, T region locus 22	0	1.9	3.73213		8.261	8.52479	8.28396	6.10457	6.7631	6.50248
10536611	Kcnd2	potassium voltage-gated channel, Shal-related family, member 2	0	1.9	3.73213		7.50837	8.1399	7.68795	5.82772	5.85336	5.94292
10588942	Lamb2	laminin, beta 2	0	1.9	3.73213		10.5427	10.9186	10.5855	8.77368	8.77425	8.78902
10396610	Mthfd1	methylenetetrahydrofolate dehydrogenase (NADP+ dependent), methenyltetrahydrofolate cyclohydrolase, formyltetrahydrofolate synthase	0	1.9	3.73213		9.27126	9.15936	9.43022	7.39133	7.44237	7.33517
10568115	Mvp	major vault protein	0	1.9	3.73213		8.95023	8.9622	8.90973	7.07894	6.94358	7.10132
10405179	S1pr3	sphingosine-1-phosphate receptor 3	0	1.9	3.73213		8.37104	9.69655	8.59074	6.79052	7.17363	6.98521
10385872	Slc22a5	solute carrier family 22 (organic cation transporter), member 5	0	1.9	3.73213		10.8682	10.441	10.9423	8.74744	8.81923	8.97348
10558903	Taldo1	transaldolase 1	0	1.9	3.73213		9.0255	8.8107	9.05882	7.14619	7.15806	6.88037
10458314	Tmem173	transmembrane protein 173	0	1.9	3.73213		7.73338	8.33171	8.07424	6.32812	6.04793	6.07672
10343273			0	1.9	3.73213		9.02913	8.88921	9.13405	7.56605	6.60428	7.17563
10344590			0.001	1.9	3.73213		10.2753	10.4918	10.1664	8.11763	8.07674	9.04585
10465314	Capn1	calpain 1	0	1.89	3.70635		8.25969	8.44207	8.39855	6.43327	6.42084	6.58384
10495163	Dram2	VDNA-damage regulated autophagy modulator 2	0	1.89	3.70635		9.70246	9.62444	9.83032	7.91555	7.7787	7.79903
10370497	Pdxk	pyridoxal (pyridoxine, vitamin B6) kinase	0	1.89	3.70635		9.51693	9.82985	9.67944	7.71343	7.92277	7.72064
10481518	Ptges	prostaglandin E synthase	0	1.89	3.70635		8.72713	9.31285	8.68793	7.1724	6.98797	6.89454
10554375	Sema4b	sema domain, immunoglobulin domain (Ig), transmembrane domain (TM) and short cytoplasmic domain, (semaphorin) 4B	0	1.89	3.70635		9.59961	10.024	9.47011	7.85618	7.88368	7.69244
10404422	Serpinb6b	serine (or cysteine) peptidase inhibitor, clade B, member 6b	0	1.89	3.70635		7.73998	7.79318	7.77943	5.78094	5.83056	6.0423
10605303	Dnase1l1	deoxyribonuclease 1-like 1	0	1.88	3.68075		7.94176	8.00347	8.04998	6.04923	6.05984	6.24509
10416411	Esd	esterase D/formylglutathione hydrolase	0	1.88	3.68075		9.75852	9.72477	9.87813	7.86239	7.87268	7.97522
10564960	Furin	furin (paired basic amino acid cleaving enzyme)	0	1.88	3.68075		9.53312	9.96574	9.42777	7.81673	7.7896	7.68794
10529485	Htra3	HtrA serine peptidase 3	0	1.88	3.68075		9.0604	9.14165	8.72301	7.07834	7.1636	7.03266
10535331	Mmd2	monocyte to macrophage differentiation-associated 2	0	1.88	3.68075		12.0961	11.8647	12.1213	10.1688	10.0272	10.2582
10391332	Ptrf	polymerase I and transcript release factor	0	1.88	3.68075		9.14348	9.34946	9.05504	7.35129	7.20374	7.36216
10363563	Slc25a16	solute carrier family 25 (mitochondrial carrier, Graves disease autoantigen), member 16	0	1.88	3.68075		9.38558	9.29984	9.26793	7.48875	7.49956	7.31234
10391286	Stat5b	signal transducer and activator of transcription 5B	0	1.88	3.68075		8.58091	8.49163	8.57665	6.75081	6.74183	6.50509
10340842			0	1.88	3.68075		11.6279	11.6665	11.7816	9.83953	9.7538	9.83199
10482824	Acvr1	activin A receptor, type 1	0	1.87	3.65533		8.01762	8.61952	8.24061	6.40895	6.54974	6.30547
10540241	Arl6ip5	ADP-ribosylation factor-like 6 interacting protein 5	0	1.87	3.65533		8.38106	8.40702	8.58074	6.46421	6.52928	6.75723
10587534	Bckdhb	branched chain ketoacid dehydrogenase E1, beta polypeptide	0	1.87	3.65533		8.57499	8.61245	8.63805	6.63376	6.93122	6.64277
10584208	Cdon	cell adhesion molecule-related/down-regulated by oncogenes	0	1.87	3.65533		8.73454	9.37795	9.01453	7.18397	7.19043	7.13285
10517573	Cela3b	chymotrypsin-like elastase family, member 3B	0	1.87	3.65533		8.04953	8.23033	7.86299	6.27846	6.21434	6.04115
10511739	Cpne3	copine III	0	1.87	3.65533		9.42033	9.43235	9.47797	7.47885	7.58692	7.64612
10492699	Ctso	cathepsin O	0	1.87	3.65533		9.68715	9.74073	9.83903	7.84876	7.76067	8.061
10603785	Fundc1	FUN14 domain containing 1	0	1.87	3.65533		8.85036	8.81037	8.97934	6.92674	6.93862	7.16873
10493995	S100a10	S100 calcium binding protein A10 (calpactin)	0	1.87	3.65533		10.5623	10.8081	10.6083	8.771	8.81707	8.7754
10536762	Snd1	staphylococcal nuclease and tudor domain containing 1	0	1.87	3.65533		10.4017	10.4777	10.5533	8.58321	8.66459	8.57854
10500802	Atg4a	autophagy-related 4A (yeast)	0	1.86	3.63008		8.82884	8.74892	9.00034	6.96726	7.08949	6.93945
10419267	Cnih	cornichon homolog (Drosophila)	0	1.86	3.63008		10.1291	9.83979	10.1071	8.25042	8.04821	8.19615
10493703	Jtb	jumping translocation breakpoint	0	1.86	3.63008		9.84649	9.85618	10.0847	8.11936	8.13559	7.94155
10436048	Prdx1	peroxiredoxin 1	0	1.86	3.63008		11.4739	11.4957	11.4879	9.72874	9.56549	9.58065
10573483	Prdx2	peroxiredoxin 2	0	1.86	3.63008		10.307	10.271	10.3465	8.41972	8.31476	8.60512
10519504	Sri	sorcin	0	1.86	3.63008		9.19446	9.05211	9.15289	7.15877	7.31027	7.34296
10503520	Ttpa	tocopherol (alpha) transfer protein	0	1.86	3.63008		7.34396	7.2232	7.56352	5.5613	5.42649	5.55673
10503502	Ttpa	tocopherol (alpha) transfer protein	0	1.86	3.63008		7.63731	7.50076	7.89978	5.82559	5.77847	5.84933
10342461			0	1.86	3.63008		10.0098	9.79949	9.99464	8.07617	8.12214	8.03965
10442914	0610011F06Rik	RIKEN cDNA 0610011F06 gene	0	1.85	3.605		10.8189	10.7534	10.8277	8.94997	9.04954	8.85441
10487711	Ddrgk1	DDRGK domain containing 1	0	1.85	3.605		10.7314	10.7319	10.7107	8.94218	8.83333	8.86149
10544932	Inmt	indolethylamine N-methyltransferase	0	1.85	3.605		8.10089	7.27356	7.92812	6.18356	5.75364	5.82493
10366052	Kitl	kit ligand	0	1.85	3.605		9.54839	9.70636	9.56712	7.77917	7.76831	7.73729
10361098	Nenf	neuron derived neurotrophic factor	0	1.85	3.605		10.2108	10.2108	10.1418	8.40183	8.32301	8.28385
10507328	Prdx1	peroxiredoxin 1	0	1.85	3.605		11.2856	11.1515	11.351	9.50754	9.43574	9.28698
10394471	Sdc1	syndecan 1	0	1.85	3.605		8.80361	8.7955	8.89218	7.16196	6.95737	6.82488
10498519	Ssr3	signal sequence receptor, gamma	0	1.85	3.605		11.5555	11.5234	11.6362	9.77928	9.61631	9.77389
10530201	Ugdh	UDP-glucose dehydrogenase	0	1.85	3.605		8.96748	9.02421	9.11871	7.19208	7.16322	7.21484
10460237	Unc93b1	unc-93 homolog B1 (C. elegans)	0	1.85	3.605		8.62235	8.67977	8.65183	6.81036	6.68484	6.90463
10339807			0	1.85	3.605		10.8311	10.9448	10.9838	8.9909	9.02194	9.20513
10381187	Atp6v0a1	ATPase, H+ transporting, lysosomal V0 subunit A1	0	1.84	3.5801		10.72	10.8903	10.8579	8.94869	8.98631	9.00286
10489246	Mafb	v-maf musculoaponeurotic fibrosarcoma oncogene family, protein B (avian)	0	1.84	3.5801		8.89274	9.02106	8.98072	7.13087	7.02577	7.22295
10476276	Mavs	mitochondrial antiviral signaling protein	0	1.84	3.5801		10.0146	10.1777	10.0963	8.22611	8.35719	8.18806
10356999	Prdx2	peroxiredoxin 2	0	1.84	3.5801		11.9542	11.9352	11.9261	10.0969	10.0198	10.1683
10490370	Psma7	proteasome (prosome, macropain) subunit, alpha type 7	0	1.84	3.5801		10.0603	10.1042	10.1386	8.22063	8.19162	8.36792
10457183	Tmx3	thioredoxin-related transmembrane protein 3	0	1.84	3.5801		10.0091	10.1762	10.1315	8.21322	8.26447	8.31422
10342499			0	1.84	3.5801		11.8475	11.8417	11.9675	10.1996	10.004	9.94342
10383206			0	1.84	3.5801		8.96715	9.42859	9.26004	7.19728	7.53197	7.39971
10413517	Chdh	choline dehydrogenase	0	1.83	3.55537		10.7129	10.7862	10.6261	8.8718	9.0563	8.70805
10602454	Fam120c	family with sequence similarity 120, member C	0	1.83	3.55537		8.17311	8.26176	8.23281	6.31507	6.46571	6.39758
10420747	Gata4	GATA binding protein 4	0	1.83	3.55537		10.2422	10.6388	10.1204	8.54542	8.58221	8.37599
10599348	Gria3	glutamate receptor, ionotropic, AMPA3 (alpha 3)	0	1.83	3.55537		7.7797	7.85346	7.69564	5.8454	5.91225	6.07379
10558265	Lhpp	phospholysine phosphohistidine inorganic pyrophosphate phosphatase	0	1.83	3.55537		9.84873	9.80046	9.88645	7.96635	7.97901	8.10992
10369154	Man1a	mannosidase 1, alpha	0	1.83	3.55537		7.94563	7.75938	7.829	5.98849	5.97445	6.0727
10498350	P2ry14	purinergic receptor P2Y, G-protein coupled, 14	0	1.83	3.55537		8.34449	8.20033	8.41403	6.47629	6.64495	6.34336
10603011	Rbbp7	retinoblastoma binding protein 7	0	1.83	3.55537		11.6138	11.807	11.7098	9.94612	9.78371	9.90673
10533360			0	1.83	3.55537		7.93557	7.93817	8.0187	6.21167	6.02142	6.1635
10383200			0	1.83	3.55537		8.22508	8.86888	8.52835	6.60673	6.85237	6.67018
10351347	Creg1	cellular repressor of E1A-stimulated genes 1	0	1.82	3.53081		10.8044	10.9698	10.9504	9.087	9.16129	9.01534
10582020	Gcsh	glycine cleavage system protein H (aminomethyl carrier)	0	1.82	3.53081		8.29706	8.35912	8.29435	6.40272	6.5509	6.54939
10404885	Gmpr	guanosine monophosphate reductase	0	1.82	3.53081		8.60336	8.77884	8.58178	6.8505	6.91351	6.73855
10455912	Isoc1	isochorismatase domain containing 1	0	1.82	3.53081		9.63297	9.68835	9.8064	7.81211	7.93442	7.91447
10365518	Nt5dc3	5'-nucleotidase domain containing 3	0	1.82	3.53081		9.73154	9.97554	9.56648	7.96595	8.0972	7.74119
10394699	Rock2	Rho-associated coiled-coil containing protein kinase 2	0	1.82	3.53081		9.97092	10.0746	9.9552	8.25504	8.18212	8.10664
10421648	Slc25a30	solute carrier family 25, member 30	0	1.82	3.53081		10.7143	10.7704	10.761	9.00565	8.89648	8.87682
10342051			0	1.82	3.53081		9.60171	9.91336	9.59602	7.61695	7.98692	8.03513
10564849	2610034B18Rik	RIKEN cDNA 2610034B18 gene	0	1.81	3.50642		7.75056	7.71132	7.52349	5.68353	5.91242	5.9568
10511446	Asph	aspartate-beta-hydroxylase	0	1.81	3.50642		8.34301	8.40362	8.42174	6.46286	6.52316	6.75341
10500276	BC028528	cDNA sequence BC028528	0	1.81	3.50642		7.54394	7.76128	7.54385	5.74748	5.94036	5.7349
10548905	Eps8	epidermal growth factor receptor pathway substrate 8	0	1.81	3.50642		9.9901	10.0957	9.95535	8.20879	8.2425	8.14907
10426894	Gm10035	predicted gene 10035	0	1.81	3.50642		8.85184	9.06046	8.70527	7.19768	6.99265	6.99566
10518743	H6pd	hexose-6-phosphate dehydrogenase (glucose 1-dehydrogenase)	0	1.81	3.50642		9.36628	9.43509	9.33777	7.40918	7.66467	7.62783
10346235	Hibch	3-hydroxyisobutyryl-Coenzyme A hydrolase	0	1.81	3.50642		8.50621	8.47027	8.67769	6.85763	6.75854	6.60295
10390117	Itga3	integrin alpha 3	0	1.81	3.50642		8.25811	8.6623	8.22531	6.67506	6.61618	6.42422
10602068	Mid2	midline 2	0	1.81	3.50642		8.20618	8.1546	8.24407	6.41143	6.50443	6.25136
10427235	Prr13	proline rich 13	0	1.81	3.50642		8.5573	8.69222	8.78123	6.80843	6.75811	7.03654
10358389	Rgs2	regulator of G-protein signaling 2	0	1.81	3.50642		8.85459	8.43276	8.82421	7.01823	6.7605	6.90576
10350742	Rnasel	ribonuclease L (2', 5'-oligoisoadenylate synthetase-dependent)	0	1.81	3.50642		7.72097	8.14274	7.96084	6.07024	6.30203	6.01668
10465772	Slc3a2	solute carrier family 3 (activators of dibasic and neutral amino acid transport), member 2	0	1.81	3.50642		13.2596	13.2828	13.3109	11.5243	11.4591	11.4504
10501811	Slc44a3	solute carrier family 44, member 3	0	1.81	3.50642		8.14586	8.2715	8.10605	6.43691	6.05798	6.60041
10582275	Slc7a5	solute carrier family 7 (cationic amino acid transporter, y+ system), member 5	0	1.81	3.50642		12.8735	13.1173	13.0144	11.2061	11.0683	11.3076
10464761	Syt12	synaptotagmin XII	0.001	1.81	3.50642		7.1772	7.83693	7.71155	5.79805	5.80455	5.70712
10534718	Trip6	thyroid hormone receptor interactor 6	0	1.81	3.50642		8.09032	8.29148	8.26422	6.51644	6.29526	6.39741
10568328	Vkorc1	vitamin K epoxide reductase complex, subunit 1	0	1.81	3.50642		9.98232	9.94577	9.84375	7.98555	8.07131	8.27767
10340357			0.002	1.81	3.50642		5.3741	5.84809	5.14209	3.15854	4.09011	3.68771
10392601	Abca6	ATP-binding cassette, sub-family A (ABC1), member 6	0	1.8	3.4822		8.01742	8.19242	7.64242	6.2323	6.10248	6.11065
10466622	C730037M02Rik	RIKEN cDNA C730037M02 gene	0	1.8	3.4822		6.01612	6.28193	6.78647	4.39758	4.37399	4.90946
10545130	Gadd45a	growth arrest and DNA-damage-inducible 45 alpha	0	1.8	3.4822		8.98867	9.04413	9.26356	7.30845	7.53849	7.03674
10554094	Igf1r	insulin-like growth factor I receptor	0	1.8	3.4822		9.45902	9.83492	9.74879	7.86894	7.80276	7.95937
10600836	Msn	moesin	0	1.8	3.4822		8.83924	8.96704	8.87905	7.01406	7.00747	7.2738
10354432	Myo1b	myosin IB	0	1.8	3.4822		8.21671	8.28953	8.26613	6.39436	6.45408	6.52777
10506031	Nfia	nuclear factor I/A	0	1.8	3.4822		9.79341	9.91908	9.68877	7.98058	8.02155	8.01385
10447675	Rnaset2a	ribonuclease T2A	0	1.8	3.4822		11.8135	11.8185	11.7354	9.96779	9.98978	10.0214
10441539	Rnaset2a	ribonuclease T2A	0	1.8	3.4822		11.821	11.8219	11.7302	9.98148	9.96313	10.0262
10379176	Unc119	unc-119 homolog (C. elegans)	0	1.8	3.4822		10.8783	10.7628	10.7036	8.97839	9.08792	8.86488
10392484	Abca8b	ATP-binding cassette, sub-family A (ABC1), member 8b	0	1.79	3.45815		7.02299	7.09899	7.02964	5.10892	5.24776	5.43075
10558948	Cd151	CD151 antigen	0	1.79	3.45815		11.6428	11.6512	11.6723	9.83273	9.78575	9.98159
10428877	E430025E21Rik	RIKEN cDNA E430025E21 gene	0	1.79	3.45815		10.0048	10.0311	10.044	8.34571	8.23615	8.13329
10605338	G6pdx	glucose-6-phosphate dehydrogenase X-linked	0	1.79	3.45815		10.3362	10.1913	10.3839	8.67553	8.42163	8.44383
10347980	Itm2c	integral membrane protein 2C	0	1.79	3.45815		11.0981	11.2231	11.1247	9.32666	9.38852	9.37251
10357345	Nckap5	NCK-associated protein 5	0	1.79	3.45815		8.34555	8.35668	8.38385	6.53559	6.63551	6.54346
10356968	Pam	peptidylglycine alpha-amidating monooxygenase	0	1.79	3.45815		10.3293	10.5619	10.3972	8.79761	8.52099	8.61382
10426544	Slc48a1	solute carrier family 48 (heme transporter), member 1	0	1.79	3.45815		10.345	10.2859	10.2469	8.48783	8.45384	8.56192
10504329			0	1.79	3.45815		9.6498	9.56399	9.54574	7.8901	7.62932	7.85625
10383192			0	1.79	3.45815		8.15624	8.62335	8.23128	6.39669	6.60684	6.64827
10461979	Aldh1a1	aldehyde dehydrogenase family 1, subfamily A1	0	1.78	3.43426		13.6781	13.6948	13.6932	11.9694	11.9257	11.8301
10565935	Arhgef17	Rho guanine nucleotide exchange factor (GEF) 17	0	1.78	3.43426		8.50773	8.92159	8.3057	6.78611	6.83679	6.77772
10482920	Cd302	CD302 antigen	0	1.78	3.43426		9.13877	9.13433	9.16501	7.4577	7.30022	7.33183
10383088	Gaa	glucosidase, alpha, acid	0	1.78	3.43426		10.4787	10.6013	10.5148	8.77682	8.74822	8.7194
10404218	Gpld1	glycosylphosphatidylinositol specific phospholipase D1	0	1.78	3.43426		8.59588	8.80873	8.61474	6.75841	6.96703	6.9627
10579347	Ifi30	interferon gamma inducible protein 30	0	1.78	3.43426		9.36167	9.19045	9.27156	7.33353	7.63129	7.53028
10417053	Mbnl2	muscleblind-like 2	0	1.78	3.43426		11.2077	10.9992	11.1293	9.38416	9.31932	9.28012
10359870	Pbx1	pre B-cell leukemia transcription factor 1	0	1.78	3.43426		9.0696	9.27808	9.15578	7.39611	7.3258	7.43211
10517655	Pla2g5	phospholipase A2, group V	0	1.78	3.43426		9.66826	9.78553	9.96186	7.95599	7.91869	8.20948
10383233	Rnf213	ring finger protein 213	0	1.78	3.43426		9.75553	9.98036	9.78721	8.05194	8.21924	7.89999
10495035	Slc16a1	solute carrier family 16 (monocarboxylic acid transporters), member 1	0	1.78	3.43426		11.2663	11.1994	11.3844	9.47952	9.57704	9.46716
10453636	Svil	supervillin	0	1.78	3.43426		8.75067	8.81769	8.6925	7.02632	6.91492	6.98574
10342860			0	1.78	3.43426		11.6457	11.6498	11.4669	9.80923	9.643	9.96452
10466938	5033414D02Rik	RIKEN cDNA 5033414D02 gene	0	1.77	3.41054		7.70135	7.67929	7.89157	5.9935	5.89688	6.07313
10412607	Abhd6	abhydrolase domain containing 6	0	1.77	3.41054		10.9308	10.6989	10.967	9.04634	9.14341	9.10326
10536818	Calu	calumenin	0	1.77	3.41054		11.2782	11.2851	11.385	9.53243	9.436	9.66159
10402211	Fbln5	fibulin 5	0	1.77	3.41054		9.36607	9.49792	9.40056	7.61771	7.6803	7.65061
10539119	Ggcx	gamma-glutamyl carboxylase	0	1.77	3.41054		8.92906	8.82185	8.97985	7.05091	7.17164	7.20875
10529895	Qdpr	quinoid dihydropteridine reductase	0	1.77	3.41054		10.5169	10.405	10.4323	8.56122	8.68046	8.8047
10489107	Samhd1	SAM domain and HD domain, 1	0	1.77	3.41054		9.80332	10.0099	9.86247	8.06469	8.05726	8.24805
10459766	Scarna17	small Cajal body-specific RNA 17	0	1.77	3.41054		9.83555	9.98429	11.0888	8.43255	8.57877	8.58931
10461642	Scarna17	small Cajal body-specific RNA 17	0	1.77	3.41054		9.83555	9.98429	11.0888	8.43255	8.57877	8.58931
10402368	Serpina6	serine (or cysteine) peptidase inhibitor, clade A, member 6	0	1.77	3.41054		6.50151	6.68342	6.62724	4.64835	4.59245	5.27206
10470834	Spna2	spectrin alpha 2	0	1.77	3.41054		12.4297	12.1053	12.1261	10.467	10.4856	10.3925
10598976	Timp1	tissue inhibitor of metalloproteinase 1	0	1.77	3.41054		7.46126	7.77853	7.56752	5.84949	5.83889	5.79613
10550316	Tmem160	transmembrane protein 160	0	1.77	3.41054		8.77611	8.68713	8.62964	6.94317	6.83237	6.99893
10344597			0	1.77	3.41054		10.1585	10.1235	10.2172	8.35765	8.30959	8.51823
10368886			0	1.77	3.41054		11.1135	10.8293	11.0414	9.23717	9.08363	9.35887
10342497			0.024	1.77	3.41054		5.43343	5.55694	5.92474	4.23154	2.49427	4.87555
10376021	2011-09-08	septin 8	0	1.76	3.38698		8.19219	8.52271	8.34972	6.7051	6.48732	6.59202
10477630	Dynlrb1	dynein light chain roadblock-type 1	0	1.76	3.38698		11.1826	11.0878	11.176	9.33223	9.3226	9.52115
10604564	Gpc4	glypican 4	0	1.76	3.38698		10.1712	10.5118	10.3217	8.53859	8.49329	8.70047
10381408	Ifi35	interferon-induced protein 35	0	1.76	3.38698		7.95626	7.9616	8.02844	6.09533	6.27731	6.29408
10373223	Lrp1	low density lipoprotein receptor-related protein 1	0	1.76	3.38698		10.3412	10.7409	10.4323	8.7958	8.7056	8.74136
10505438	Orm1	orosomucoid 1	0	1.76	3.38698		7.44069	7.04708	6.87432	5.34324	5.62472	5.12148
10594501	Ptplad1	protein tyrosine phosphatase-like A domain containing 1	0	1.76	3.38698		11.3951	11.289	11.4929	9.69284	9.63431	9.5814
10488797	Pxmp4	peroxisomal membrane protein 4	0	1.76	3.38698		8.25972	8.34009	8.26143	6.53529	6.59063	6.45523
10498064	Setd7	SET domain containing (lysine methyltransferase) 7	0	1.76	3.38698		8.1599	8.31905	7.9943	6.46125	6.50016	6.22831
10588007	Tfdp2	transcription factor Dp 2	0	1.76	3.38698		10.2671	10.4718	10.225	8.58301	8.58535	8.51509
10393064	Unc13d	unc-13 homolog D (C. elegans)	0	1.76	3.38698		8.14575	8.08422	8.0625	6.35081	6.24177	6.41417
10401238	Zfp36l1	zinc finger protein 36, C3H type-like 1	0	1.76	3.38698		10.0219	10.0829	9.82449	8.35759	8.14419	8.15916
10344141			0	1.76	3.38698		12.206	12.2837	12.3178	10.4222	10.4	10.7066
10343769			0	1.76	3.38698		6.64417	6.81074	6.88109	4.93512	4.85085	5.2761
10466530			0	1.76	3.38698		8.29365	8.3485	8.49315	6.50212	6.56205	6.78454
10338268			0	1.76	3.38698		6.40025	5.87975	5.7257	4.18134	3.86108	4.67755
10492078	Alg5	asparagine-linked glycosylation 5 homolog (yeast, dolichyl-phosphate beta-glucosyltransferase)	0	1.75	3.36359		9.39814	9.25657	9.55811	7.65158	7.59046	7.71777
10450038	Angptl4	angiopoietin-like 4	0	1.75	3.36359		8.89003	8.26904	8.7237	7.19651	6.72449	6.70831
10505994	Fggy	FGGY carbohydrate kinase domain containing	0	1.75	3.36359		7.8185	7.82846	7.86301	5.91225	6.25841	6.08664
10386551	Flii	flightless I homolog (Drosophila)	0	1.75	3.36359		10.399	10.5063	10.3988	8.69819	8.69003	8.66452
10370766	Gamt	guanidinoacetate methyltransferase	0	1.75	3.36359		9.86603	9.83766	9.96751	8.17104	8.11367	8.14215
10586347	Parp16	poly (ADP-ribose) polymerase family, member 16	0	1.75	3.36359		8.8498	9.11684	8.86476	7.21885	7.17932	7.17613
10556113	Rbm3	RNA binding motif protein 3	0	1.75	3.36359		11.5291	11.5817	11.7084	9.87972	9.88147	9.81096
10340339			0.003	1.75	3.36359		5.70578	6.13014	5.63143	3.88651	4.34896	3.98287
10343874			0.003	1.75	3.36359		7.76364	8.43818	7.4245	6.59668	5.51708	6.26215
10344363			0.027	1.75	3.36359		5.89299	6.62137	6.56186	5.09869	3.00297	5.73645
10395376	Ankmy2	ankyrin repeat and MYND domain containing 2	0	1.74	3.34035		8.51166	8.58727	8.53685	6.72087	6.88532	6.80798
10512129	B4galt1	UDP-Gal:betaGlcNAc beta 1,4- galactosyltransferase, polypeptide 1	0	1.74	3.34035		10.8475	10.9932	10.7974	9.19604	9.11728	9.1034
10455588	Hspe1	heat shock protein 1 (chaperonin 10)	0	1.74	3.34035		11.0542	11.3509	11.243	9.39955	9.33965	9.68871
10506298	Leprot	leptin receptor overlapping transcript	0	1.74	3.34035		9.35079	9.38461	9.6677	7.63299	7.76891	7.79188
10493692	Rab13	RAB13, member RAS oncogene family	0	1.74	3.34035		8.93243	8.84329	8.94142	7.06217	7.19309	7.24041
10425695	Srebf2	sterol regulatory element binding factor 2	0	1.74	3.34035		10.185	10.2936	10.2426	8.50541	8.5446	8.46259
10343787			0	1.74	3.34035		11.2675	11.3805	11.3229	9.53478	9.53752	9.68531
10344017			0	1.74	3.34035		12.0392	12.1791	12.0784	10.3605	10.2298	10.4927
10488472	2310001A20Rik	RIKEN cDNA 2310001A20 gene	0	1.73	3.31728		10.1467	10.1296	10.1191	8.3478	8.36006	8.4904
10581455	Esrp2	epithelial splicing regulatory protein 2	0	1.73	3.31728		7.84767	8.35922	7.90649	6.21566	6.23745	6.46469
10522060	Fam114a1	family with sequence similarity 114, member A1	0	1.73	3.31728		8.33383	8.38333	8.38035	6.44471	6.74778	6.70296
10505996	Fggy	FGGY carbohydrate kinase domain containing	0	1.73	3.31728		9.21259	9.33122	9.19909	7.39179	7.58478	7.56647
10481627	Lcn2	lipocalin 2	0	1.73	3.31728		13.5339	13.5545	13.5113	11.9315	11.6841	11.792
10587446	Myo6	myosin VI	0	1.73	3.31728		10.2605	10.2556	10.255	8.43751	8.59666	8.54291
10465521	Plcb3	phospholipase C, beta 3	0	1.73	3.31728		9.32541	9.58334	9.27436	7.82279	7.60886	7.54785
10555946	Smpd1	sphingomyelin phosphodiesterase 1, acid lysosomal	0	1.73	3.31728		9.05907	8.83402	9.03118	7.25344	7.20899	7.26226
10518300	Tnfrsf1b	tumor necrosis factor receptor superfamily, member 1b	0	1.73	3.31728		8.93524	8.61067	8.67058	7.21105	6.81852	7.00446
10605820	Zc4h2	zinc finger, C4H2 domain containing	0	1.73	3.31728		8.34038	8.29824	8.20906	6.51356	6.52457	6.60908
10383208			0	1.73	3.31728		7.74346	8.10166	8.0941	6.21536	6.47703	6.06684
10368700			0	1.73	3.31728		7.06549	6.88222	7.27005	4.98839	5.39001	5.64952
10566502	Arfip2	ADP-ribosylation factor interacting protein 2	0	1.72	3.29436		9.47899	9.49345	9.46496	7.75135	7.76001	7.75564
10385271	Ccng1	cyclin G1	0	1.72	3.29436		10.5978	10.6523	10.3762	8.86282	8.70921	8.89189
10457071	Cyb5	cytochrome b-5	0	1.72	3.29436		10.8884	10.8393	10.7947	9.18412	9.20036	8.97104
10497548	Fndc3b	fibronectin type III domain containing 3B	0	1.72	3.29436		10.06	9.94957	10.1033	8.30083	8.28753	8.3701
10472958	Hoxd10	homeobox D10	0	1.72	3.29436		8.51506	8.43024	8.46906	6.94611	6.46373	6.85618
10346303	Hspe1	heat shock protein 1 (chaperonin 10)	0	1.72	3.29436		10.7808	11.0993	10.9933	9.16879	9.10299	9.43575
10362829	Ostm1	osteopetrosis associated transmembrane protein 1	0	1.72	3.29436		9.44779	9.11135	9.41071	7.62905	7.51685	7.67088
10586477	Ppib	peptidylprolyl isomerase B	0	1.72	3.29436		11.6364	11.6063	11.624	9.96772	9.91322	9.82434
10360648	Psen2	presenilin 2	0	1.72	3.29436		8.9699	9.01007	8.82243	7.38155	7.19054	7.07977
10590597	Sacm1l	SAC1 (suppressor of actin mutations 1, homolog)-like (S. cerevisiae)	0	1.72	3.29436		10.1693	10.0748	10.4053	8.38348	8.53862	8.58134
10458033	Stard4	StAR-related lipid transfer (START) domain containing 4	0	1.72	3.29436		9.12901	8.94885	9.28403	7.32041	7.36521	7.5077
10527920	Cyp51	cytochrome P450, family 51	0	1.71	3.27161		11.119	10.7249	11.2643	9.21729	9.42839	9.34476
10506767	Echdc2	enoyl Coenzyme A hydratase domain containing 2	0	1.71	3.27161		8.14127	8.06052	8.18423	6.20909	6.20666	6.82552
10483865	Fkbp7	FK506 binding protein 7	0	1.71	3.27161		10.1618	10.3929	10.2859	8.64453	8.54772	8.51594
10493435	Gba	glucosidase, beta, acid	0	1.71	3.27161		9.83836	10.017	10.0145	8.21948	8.26324	8.2541
10357579	Mapkapk2	MAP kinase-activated protein kinase 2	0	1.71	3.27161		9.80208	10.0119	9.78949	8.16612	8.08679	8.21171
10601164	Nono	non-POU-domain-containing, octamer binding protein	0	1.71	3.27161		10.4598	10.4875	10.4703	8.70457	8.70315	8.8758
10415248	Pck2	phosphoenolpyruvate carboxykinase 2 (mitochondrial)	0	1.71	3.27161		8.65024	8.62101	8.54484	7.01664	6.87966	6.776
10476401	Plcb1	phospholipase C, beta 1	0	1.71	3.27161		8.6352	9.1122	8.67387	7.05299	7.12396	7.11713
10460376	Ppp1ca	protein phosphatase 1, catalytic subunit, alpha isoform	0	1.71	3.27161		10.9272	10.7278	10.9126	9.19287	9.12214	9.12891
10602164	Rbbp7	retinoblastoma binding protein 7	0	1.71	3.27161		11.8826	12.0622	12.0741	10.3303	10.2041	10.3612
10358454	Rbm3	RNA binding motif protein 3	0	1.71	3.27161		11.3153	11.3834	11.5193	9.72802	9.7005	9.65138
10512443	Stoml2	stomatin (Epb7.2)-like 2	0	1.71	3.27161		9.77774	9.44388	9.6544	7.76992	8.03517	7.94369
10546092			0	1.71	3.27161		10.3759	10.4192	10.3362	8.62312	8.67496	8.71363
10345174			0	1.71	3.27161		9.10219	9.23436	9.17419	7.42319	7.52922	7.42934
10344351			0	1.71	3.27161		7.41342	7.89088	7.28559	5.38535	5.76763	6.30171
10515352	Akr1a4	aldo-keto reductase family 1, member A4 (aldehyde reductase)	0	1.7	3.24901		12.2632	12.331	12.2675	10.5612	10.5093	10.6905
10532993	Cox6a1	cytochrome c oxidase, subunit VI a, polypeptide 1	0	1.7	3.24901		11.6619	11.6643	11.6104	9.9674	9.87437	9.98944
10593966	Csk	c-src tyrosine kinase	0	1.7	3.24901		9.14805	9.50614	9.17251	7.47847	7.54396	7.69316
10584700	Dpagt1	dolichyl-phosphate (UDP-N-acetylglucosamine) acetylglucosaminephosphotransferase 1 (GlcNAc-1-P transferase)	0	1.7	3.24901		8.03948	7.96892	8.17149	6.30536	6.18091	6.60168
10571567	Sorbs2	sorbin and SH3 domain containing 2	0	1.7	3.24901		8.26031	8.46629	8.31721	6.42874	6.83426	6.66793
10434758	St6gal1	beta galactoside alpha 2,6 sialyltransferase 1	0	1.7	3.24901		8.98471	8.97804	8.99034	7.37625	7.35522	7.11878
10431802	Twf1	twinfilin, actin-binding protein, homolog 1 (Drosophila)	0	1.7	3.24901		10.8997	10.9522	10.969	9.33371	9.30333	9.09047
10343176			0	1.7	3.24901		11.4399	11.5599	11.5239	9.66322	9.76964	10.0046
10344011			0	1.7	3.24901		11.1467	11.6243	11.5183	9.6565	9.54373	9.98982
10365136	Aes	amino-terminal enhancer of split	0	1.69	3.22657		10.3304	10.2936	10.1427	8.71788	8.51899	8.45293
10602090	Atg4a	autophagy-related 4A (yeast)	0	1.69	3.22657		8.34967	8.27898	8.52816	6.61855	6.78569	6.67503
10387029	Dnahc9	dynein, axonemal, heavy chain 9	0	1.69	3.22657		8.40068	8.31374	8.29464	6.65051	6.76773	6.53187
10419223	Fermt2	fermitin family homolog 2 (Drosophila)	0	1.69	3.22657		9.66509	9.46585	9.5948	7.96883	7.8303	7.84505
10391277	Ghdc	GH3 domain containing	0	1.69	3.22657		7.96058	7.84827	7.90901	6.23157	6.32484	6.08093
10435266	Heg1	HEG homolog 1 (zebrafish)	0	1.69	3.22657		8.60646	8.98125	8.78104	7.34614	6.85942	7.09199
10395163	Lamb1	laminin B1	0	1.69	3.22657		9.59203	9.41562	9.64613	7.86562	7.81667	7.90215
10411782	Pik3r1	phosphatidylinositol 3-kinase, regulatory subunit, polypeptide 1 (p85 alpha)	0	1.69	3.22657		8.36609	8.53199	8.5125	6.85868	6.75705	6.72847
10600349	Rpl10	ribosomal protein 10	0	1.69	3.22657		12.5637	12.5099	12.5799	10.9904	10.8518	10.735
10431894	Slc38a2	solute carrier family 38, member 2	0	1.69	3.22657		10.8387	11.2293	11.2324	9.30379	9.39176	9.53538
10427095	Tenc1	tensin like C1 domain-containing phosphatase	0	1.69	3.22657		8.18389	8.9305	8.22464	6.76518	6.75678	6.75112
10534679	Trim56	tripartite motif-containing 56	0	1.69	3.22657		8.39745	8.79116	8.4342	6.86728	7.0568	6.63837
10516007	Zmpste24	zinc metallopeptidase, STE24 homolog (S. cerevisiae)	0	1.69	3.22657		10.6742	10.6566	10.7476	8.93433	8.98829	9.08081
10383204			0	1.69	3.22657		8.52665	9.03184	8.70714	6.95707	7.18039	7.04879
10339682			0	1.69	3.22657		5.24315	5.74054	4.92505	3.23532	3.81214	3.80612
10400896	2810055F11Rik	RIKEN cDNA 2810055F11 gene	0	1.68	3.20428		7.59106	8.11153	7.8994	6.21345	6.11824	6.22208
10579532	Bst2	bone marrow stromal cell antigen 2	0	1.68	3.20428		9.01218	9.1859	9.23131	7.29082	7.55831	7.54241
10466304	Dtx4	deltex 4 homolog (Drosophila)	0	1.68	3.20428		9.95687	9.85146	9.90606	8.28462	8.33441	8.05666
10599627	Hprt	hypoxanthine guanine phosphoribosyl transferase	0	1.68	3.20428		10.3642	10.3467	10.4552	8.7156	8.69247	8.70858
10462195	Kank1	KN motif and ankyrin repeat domains 1	0	1.68	3.20428		9.6487	9.65724	9.52053	7.95803	7.86343	7.97161
10452639	Myl12b	myosin, light chain 12B, regulatory	0	1.68	3.20428		11.6772	11.5953	11.652	10.0325	9.92048	9.91908
10470027	Npdc1	neural proliferation, differentiation and control gene 1	0	1.68	3.20428		8.60511	8.43382	8.35418	6.7807	6.79193	6.77964
10393823	P4hb	prolyl 4-hydroxylase, beta polypeptide	0	1.68	3.20428		11.8881	11.92	11.9146	10.2545	10.2158	10.202
10514779	Prkaa2	protein kinase, AMP-activated, alpha 2 catalytic subunit	0	1.68	3.20428		8.05919	8.05693	8.074	6.21321	6.31957	6.62548
10596379	Rpl10	ribosomal protein 10	0	1.68	3.20428		12.3532	12.2803	12.3439	10.7781	10.6669	10.5009
10511975	Slc35a1	solute carrier family 35 (CMP-sialic acid transporter), member 1	0	1.68	3.20428		8.56121	8.7145	8.73959	6.99677	6.92509	7.05943
10466075	Tmem132a	transmembrane protein 132A	0	1.68	3.20428		9.23362	8.87494	9.34475	7.55751	7.39493	7.47408
10555892	Twf1	twinfilin, actin-binding protein, homolog 1 (Drosophila)	0	1.68	3.20428		10.6523	10.6644	10.6276	9.01454	9.02874	8.87405
10599369	Xiap	X-linked inhibitor of apoptosis	0	1.68	3.20428		8.92219	8.96832	9.0686	7.48578	7.29156	7.13292
10338522			0	1.68	3.20428		11.8403	11.7854	11.9916	10.2654	10.102	10.2166
10416588	1300010F03Rik	RIKEN cDNA 1300010F03 gene	0	1.67	3.18215		10.103	10.0888	10.0492	8.34898	8.56885	8.32073
10364102	Chchd10	coiled-coil-helix-coiled-coil-helix domain containing 10	0	1.67	3.18215		10.7213	10.6497	10.719	8.96232	8.96331	9.13963
10442691	Clcn7	chloride channel 7	0	1.67	3.18215		10.0949	9.97419	10.1654	8.4595	8.34763	8.41049
10422052	Commd6	COMM domain containing 6	0	1.67	3.18215		9.74641	9.68875	9.86753	8.00201	8.04488	8.23817
10465633	Cox8a	cytochrome c oxidase, subunit VIIIa	0	1.67	3.18215		10.5918	10.5207	10.5529	8.73518	8.64027	9.27174
10350646	Edem3	ER degradation enhancer, mannosidase alpha-like 3	0	1.67	3.18215		10.2192	10.1593	10.1664	8.51622	8.43364	8.59792
10407792	Gpr137b-ps	G protein-coupled receptor 137B, pseudogene	0	1.67	3.18215		8.29592	8.27361	8.28122	6.66804	6.55919	6.60898
10444830	H2-Q7	histocompatibility 2, Q region locus 7	0	1.67	3.18215		10.7155	10.8901	10.9467	9.09504	9.12789	9.30877
10598863	Rgn	regucalcin	0	1.67	3.18215		6.44131	6.38782	6.52839	4.94981	4.41094	4.99292
10383214	Rnf213	ring finger protein 213	0	1.67	3.18215		9.15894	9.331	9.33472	7.5876	7.63428	7.60581
10593320	Rpl10	ribosomal protein 10	0	1.67	3.18215		12.4165	12.3485	12.4231	10.8569	10.7142	10.6116
10388440	Serpinf2	serine (or cysteine) peptidase inhibitor, clade F, member 2	0	1.67	3.18215		8.27892	8.21618	8.21998	6.69929	6.48542	6.51114
10384885	Spnb2	spectrin beta 2	0	1.67	3.18215		11.3944	11.1366	11.0169	9.60329	9.4638	9.48015
10599951	1110012L19Rik	RIKEN cDNA 1110012L19 gene	0	1.66	3.16017		5.70753	5.73399	6.10605	4.00525	4.61671	3.93826
10537146	Akr1b8	aldo-keto reductase family 1, member B8	0	1.66	3.16017		10.8397	10.7146	10.9022	9.17437	9.22998	9.0711
10446833	Birc6	baculoviral IAP repeat-containing 6	0	1.66	3.16017		10.7963	11.1359	11.0361	9.3146	9.43143	9.24468
10375360	Ebf1	early B-cell factor 1	0	1.66	3.16017		8.0598	7.9596	7.91877	6.3703	6.19461	6.38002
10487890	Erv3	endogenous retroviral sequence 3	0	1.66	3.16017		6.89079	7.37803	7.10631	5.7427	5.15678	5.49006
10409999	Fbp2	fructose bisphosphatase 2	0	1.66	3.16017		7.96222	8.33329	8.26348	6.51669	6.50284	6.56444
10413008	Fut11	fucosyltransferase 11	0	1.66	3.16017		9.03972	8.88829	8.94722	7.24809	7.22763	7.40809
10377982	Kif1c	kinesin family member 1C	0	1.66	3.16017		7.2776	7.49072	7.57971	5.84774	5.62947	5.87969
10485654	Rpl10	ribosomal protein 10	0	1.66	3.16017		12.6076	12.5603	12.6358	11.0484	10.9312	10.8298
10467256	Rpl10	ribosomal protein 10	0	1.66	3.16017		12.3772	12.2994	12.3719	10.8244	10.6753	10.5831
10533929	Scarb1	scavenger receptor class B, member 1	0	1.66	3.16017		12.1398	11.942	12.1715	10.4639	10.3672	10.4475
10369210	Serinc1	serine incorporator 1	0	1.66	3.16017		12.2449	12.2228	12.348	10.5332	10.5805	10.718
10458428	Uxt	ubiquitously expressed transcript	0	1.66	3.16017		9.80951	9.75324	9.83759	8.17148	8.07871	8.17924
10339697			0	1.66	3.16017		11.1789	11.2831	11.0599	9.54596	9.61434	9.37828
10340289			0.005	1.66	3.16017		5.37529	6.38116	4.88914	3.82246	4.50827	3.32506
10382136	1810010H24Rik	RIKEN cDNA 1810010H24 gene	0	1.65	3.13834		7.66213	7.367	7.49956	5.87225	6.21738	5.47571
10406564	Acot12	acyl-CoA thioesterase 12	0	1.65	3.13834		8.39743	8.09199	8.41711	6.683	6.61549	6.65749
10358816	Lamc1	laminin, gamma 1	0	1.65	3.13834		9.01851	9.36348	8.98901	7.40704	7.49277	7.50738
10472501	Lass6	LAG1 homolog, ceramide synthase 6	0	1.65	3.13834		9.89712	9.92787	9.93433	8.26013	8.38147	8.16771
10579341	Mpv17l2	MPV17 mitochondrial membrane protein-like 2	0	1.65	3.13834		10.6071	10.3795	10.5609	8.93406	8.86411	8.78846
10471411	Ptges2	prostaglandin E synthase 2	0	1.65	3.13834		9.00138	8.99805	8.98651	7.2655	7.29812	7.48432
10359034	Qsox1	quiescin Q6 sulfhydryl oxidase 1	0	1.65	3.13834		12.1768	12.3105	12.2169	10.6509	10.5844	10.5199
10603469	Rbm3	RNA binding motif protein 3	0	1.65	3.13834		11.1015	11.1409	11.2787	9.54586	9.51736	9.51084
10501586	S1pr1	sphingosine-1-phosphate receptor 1	0	1.65	3.13834		7.95974	8.22615	8.09468	6.46992	6.19806	6.67601
10359713	Sft2d2	SFT2 domain containing 2	0	1.65	3.13834		10.4394	10.4808	10.4062	8.77635	8.77336	8.83453
10545812	Sfxn5	sideroflexin 5	0	1.65	3.13834		8.03405	7.93556	8.19483	6.33727	6.37226	6.5101
10483604	Slc25a12	solute carrier family 25 (mitochondrial carrier, Aralar), member 12	0	1.65	3.13834		8.96727	8.89458	9.13324	7.28408	7.37891	7.38575
10450116	Slc39a7	solute carrier family 39 (zinc transporter), member 7	0	1.65	3.13834		9.59293	9.78512	9.68936	7.90828	8.10183	8.11253
10372488	Tmem19	transmembrane protein 19	0	1.65	3.13834		9.32293	9.42102	9.37658	7.65696	7.69404	7.80944
10432509	Uxt	ubiquitously expressed transcript	0	1.65	3.13834		10.1068	10.0057	10.1066	8.42531	8.36317	8.47549
10344428			0	1.65	3.13834		6.42297	6.69358	6.68246	5.18671	5.23731	4.42045
10339145			0.002	1.65	3.13834		7.21589	8.43407	7.86098	5.82216	6.5926	6.14624
10354019	2010300C02Rik	RIKEN cDNA 2010300C02 gene	0	1.64	3.11666		8.74558	8.97219	8.73392	7.2967	7.15415	7.08861
10521391	Acox3	acyl-Coenzyme A oxidase 3, pristanoyl	0	1.64	3.11666		11.0094	10.9088	11.0212	9.3435	9.41759	9.26779
10607089	Acsl4	acyl-CoA synthetase long-chain family member 4	0	1.64	3.11666		10.1235	10.1514	10.3977	8.62315	8.59318	8.54013
10596454	Alas1	aminolevulinic acid synthase 1	0	1.64	3.11666		11.8796	12.3833	12.2073	10.3829	10.6209	10.5511
10450699	EG547347	predicted gene, EG547347	0	1.64	3.11666		8.70901	8.87129	8.88178	7.2308	7.11593	7.18866
10420675	Gucy1b2	guanylate cyclase 1, soluble, beta 2	0	1.64	3.11666		7.33178	7.13194	7.29438	5.53244	5.97777	5.34083
10529732	Hs3st1	heparan sulfate (glucosamine) 3-O-sulfotransferase 1	0	1.64	3.11666		7.5678	7.44463	7.6555	6.03437	5.82258	5.87785
10569344	Igf2	insulin-like growth factor 2	0	1.64	3.11666		9.23703	9.43857	8.98796	7.5545	7.58539	7.61334
10459481	Lman1	lectin, mannose-binding, 1	0	1.64	3.11666		10.2742	10.1319	10.2615	8.55308	8.65853	8.54899
10437885	Myh11	myosin, heavy polypeptide 11, smooth muscle	0	1.64	3.11666		10.1193	9.8805	9.91587	8.32274	8.31469	8.34681
10502732	Prkacb	protein kinase, cAMP dependent, catalytic, beta	0	1.64	3.11666		10.0165	10.1923	9.92354	8.44466	8.36882	8.40785
10410039	Ptch1	patched homolog 1	0	1.64	3.11666		9.35127	9.33165	9.42064	7.78774	7.7373	7.6638
10607832	Rab9	RAB9, member RAS oncogene family	0	1.64	3.11666		8.02918	8.01036	8.3201	6.48873	6.40583	6.53227
10366956	Stat6	signal transducer and activator of transcription 6	0	1.64	3.11666		8.62096	8.95497	8.7094	7.20311	7.18944	6.97852
10525016	Tbx3	T-box 3	0	1.64	3.11666		8.92996	9.16118	8.86016	7.42226	7.30212	7.29461
10578493	Tlr3	toll-like receptor 3	0	1.64	3.11666		7.03147	6.84086	7.03951	5.22947	5.45586	5.31866
10600093	Zfp185	zinc finger protein 185	0	1.64	3.11666		9.75258	9.76411	9.67792	8.11387	8.20829	7.96021
10344495			0	1.64	3.11666		10.1137	10.1645	10.2146	8.44167	8.597	8.52724
10340341			0.005	1.64	3.11666		4.98751	6.5325	5.52943	3.86342	4.2749	3.97911
10371356	Appl2	adaptor protein, phosphotyrosine interaction, PH domain and leucine zipper containing 2	0	1.63	3.09513		10.5106	10.7588	10.4983	8.93122	9.10501	8.82685
10406672	Arsb	arylsulfatase B	0	1.63	3.09513		8.52978	8.75358	8.60077	6.95767	6.96819	7.06238
10535559	Baiap2l1	BAI1-associated protein 2-like 1	0	1.63	3.09513		8.60374	8.96904	8.67419	7.08624	7.13888	7.12099
10551347	Blvrb	biliverdin reductase B (flavin reductase (NADPH))	0	1.63	3.09513		9.14311	9.00102	8.9592	7.52519	7.44758	7.25526
10607395	Mageh1	melanoma antigen, family H, 1	0	1.63	3.09513		7.07503	7.27374	7.3685	5.62584	5.42738	5.78382
10578539	Slc25a4	solute carrier family 25 (mitochondrial carrier, adenine nucleotide translocator), member 4	0	1.63	3.09513		11.1821	11.2851	11.439	9.59594	9.65213	9.78067
10503259	Trp53inp1	transformation related protein 53 inducible nuclear protein 1	0	1.63	3.09513		11.1777	10.9889	11.1497	9.49089	9.48925	9.44423
10435791			0	1.63	3.09513		6.5726	6.83672	6.665	4.97047	5.20198	5.02392
10341190			0.012	1.63	3.09513		6.11007	6.86455	5.9258	3.72724	5.54873	4.73523
10475625	Eid1	EP300 interacting inhibitor of differentiation 1	0	1.62	3.07375		8.78394	8.87207	9.1139	7.36465	7.22004	7.32824
10557782	Hsd3b7	hydroxy-delta-5-steroid dehydrogenase, 3 beta- and steroid delta-isomerase 7	0	1.62	3.07375		8.8162	8.75095	8.84935	7.02842	7.28052	7.25219
10376326	Irgm2	immunity-related GTPase family M member 2	0	1.62	3.07375		6.99594	7.23954	7.50504	5.46412	5.49621	5.93323
10362538	Lama4	laminin, alpha 4	0	1.62	3.07375		8.18664	8.06189	8.05161	6.50544	6.4488	6.47362
10411611	Naip5	NLR family, apoptosis inhibitory protein 5	0	1.62	3.07375		6.29871	6.55757	6.62989	4.99186	4.73039	4.91104
10581505	Rpl10	ribosomal protein 10	0	1.62	3.07375		12.3679	12.3049	12.3666	10.8507	10.736	10.5996
10542740	Sspn	sarcospan	0	1.62	3.07375		8.52209	8.53682	8.48047	6.61393	7.27654	6.78295
10434191	Txnrd2	thioredoxin reductase 2	0	1.62	3.07375		8.50468	8.42631	8.58194	6.99073	6.8203	6.83579
10515385	Urod	uroporphyrinogen decarboxylase	0	1.62	3.07375		9.53247	9.49476	9.56446	7.90844	8.07467	7.75386
10339936			0	1.62	3.07375		12.6068	12.6434	12.707	11.0786	10.9603	11.0651
10383212			0	1.62	3.07375		8.79486	9.16875	8.99066	7.35856	7.42723	7.32253
10339359			0.034	1.62	3.07375		4.07892	5.39721	4.48358	2.11799	4.04051	2.94604
10468691	Ablim1	actin-binding LIM protein 1	0	1.61	3.05252		8.62994	8.80598	8.48805	7.03682	7.04187	7.02211
10572357	Cope	coatomer protein complex, subunit epsilon	0	1.61	3.05252		11.2593	11.2009	11.1892	9.64448	9.63617	9.54893
10494227	Lass2	LAG1 homolog, ceramide synthase 2	0	1.61	3.05252		10.8756	10.6258	10.9066	9.22029	9.11767	9.22573
10601857	Ngfrap1	nerve growth factor receptor (TNFRSF16) associated protein 1	0	1.61	3.05252		9.10824	9.16093	9.05975	7.56531	7.52899	7.41713
10473022	Plp2	proteolipid protein 2	0	1.61	3.05252		8.91045	8.87901	8.78169	7.18701	7.17466	7.39153
10550400	Pnmal2	PNMA-like 2	0	1.61	3.05252		8.89041	9.47575	8.89884	7.39742	7.41443	7.62648
10492180	Rnf13	ring finger protein 13	0	1.61	3.05252		9.84644	9.81957	9.91422	8.34221	8.30139	8.11642
10506643	Tmem59	transmembrane protein 59	0	1.61	3.05252		12.4089	12.366	12.4227	10.8393	10.7116	10.8102
10343112			0.001	1.61	3.05252		5.60595	5.86367	6.26718	4.17121	4.39369	4.33786
10440491	App	amyloid beta (A4) precursor protein	0	1.6	3.03143		11.6062	11.8215	11.7147	10.1159	10.0914	10.1457
10393926	Dcxr	dicarbonyl L-xylulose reductase	0	1.6	3.03143		9.43591	9.48324	9.32455	7.81757	7.77411	7.86241
10558345	Dock1	dedicator of cytokinesis 1	0	1.6	3.03143		9.18599	9.41566	9.32113	7.58251	7.90952	7.63766
10551614	Ech1	enoyl coenzyme A hydratase 1, peroxisomal	0	1.6	3.03143		11.8946	11.8831	11.8662	10.3422	10.3706	10.1308
10363901	Etv5	ets variant gene 5	0	1.6	3.03143		9.93871	9.99496	9.92914	8.32272	8.30128	8.42709
10472962	Hoxd9	homeobox D9	0	1.6	3.03143		7.31252	7.56984	7.22757	5.92591	5.77063	5.609
10606876	Morf4l2	mortality factor 4 like 2	0	1.6	3.03143		9.36863	9.5332	9.72059	7.8586	7.87442	8.08599
10599435	Ocrl	oculocerebrorenal syndrome of Lowe	0	1.6	3.03143		8.77013	8.97759	8.55809	7.21447	7.20306	7.09025
10490794	Pkia	protein kinase inhibitor, alpha	0	1.6	3.03143		7.51555	7.69445	7.54061	6.17486	5.97655	5.78708
10356082	Plscr1	phospholipid scramblase 1	0	1.6	3.03143		7.4382	7.57018	7.55421	5.5769	6.24173	5.93811
10472860	Rapgef4	Rap guanine nucleotide exchange factor (GEF) 4	0	1.6	3.03143		9.54607	9.37277	9.28006	7.82673	7.90195	7.67766
10543031	Slc25a13	solute carrier family 25 (mitochondrial carrier, adenine nucleotide translocator), member 13	0	1.6	3.03143		9.38132	9.46203	9.73932	7.79779	8.0367	7.9578
10598474	Slc35a2	solute carrier family 35 (UDP-galactose transporter), member A2	0	1.6	3.03143		9.32521	9.18409	9.39731	7.58664	7.67297	7.83901
10606689	Timm8a1	translocase of inner mitochondrial membrane 8 homolog a1 (yeast)	0	1.6	3.03143		7.77958	7.6812	8.10933	6.20146	6.42597	6.13175
10383196			0	1.6	3.03143		8.2445	8.75108	8.41353	6.87121	6.98804	6.73572
10339247			0	1.6	3.03143		9.92466	10.161	10.1214	8.51883	8.218	8.67433
10342808			0.005	1.6	3.03143		7.53419	8.11105	7.64413	6.15593	6.77078	5.55421
10408647	1810022C23Rik	RIKEN cDNA 1810022C23 gene	0	1.59	3.01049		6.64568	6.86926	6.83282	5.10367	5.29166	5.19498
10439612	Boc	biregional cell adhesion molecule-related/down-regulated by oncogenes (Cdon) binding protein	0	1.59	3.01049		8.78466	9.00263	8.74725	7.32366	7.12443	7.32288
10520234	Chpf2	chondroitin polymerizing factor 2	0	1.59	3.01049		8.23322	8.29198	8.23107	6.78455	6.67058	6.54474
10468239	Cyp17a1	cytochrome P450, family 17, subfamily a, polypeptide 1	0	1.59	3.01049		13.6875	13.5367	13.5737	12.187	11.7275	12.1084
10495993	Elovl6	ELOVL family member 6, elongation of long chain fatty acids (yeast)	0	1.59	3.01049		9.22155	8.96864	9.25499	7.54043	7.55095	7.58789
10405211	Gadd45g	growth arrest and DNA-damage-inducible 45 gamma	0	1.59	3.01049		8.94438	8.74666	8.92309	7.18281	7.37154	7.28116
10459405	Nars	asparaginyl-tRNA synthetase	0	1.59	3.01049		11.0932	11.115	11.1738	9.53286	9.49221	9.59606
10604735	Rbmx	RNA binding motif protein, X chromosome	0	1.59	3.01049		8.44111	8.46352	8.58741	6.79789	7.17059	6.74739
10344432			0	1.59	3.01049		6.42592	7.22603	6.34381	4.70905	5.17036	5.35333
10342540			0.01	1.59	3.01049		6.43753	6.9087	6.49592	4.43648	5.76886	4.87914
10391119	1110036O03Rik	RIKEN cDNA 1110036O03 gene	0	1.58	2.9897		8.67365	8.7039	8.73968	6.90383	7.18961	7.29444
10480381	Arhgap21	Rho GTPase activating protein 21	0	1.58	2.9897		8.47659	8.70612	8.34519	7.08094	6.9756	6.72392
10449142	Fam195a	family with sequence similarity 195, member A	0	1.58	2.9897		9.34215	9.19835	9.20243	7.78055	7.51514	7.70355
10501218	Gstm3	glutathione S-transferase, mu 3	0	1.58	2.9897		8.50569	8.47821	8.11591	7.05643	6.71025	6.59085
10552945	Gys1	glycogen synthase 1, muscle	0	1.58	2.9897		8.07552	8.1169	7.95861	6.39493	6.3962	6.62172
10379044	Rab34	RAB34, member of RAS oncogene family	0	1.58	2.9897		8.95332	8.84644	8.74691	7.24434	7.41094	7.15582
10531437	Scarb2	scavenger receptor class B, member 2	0	1.58	2.9897		9.39265	9.58578	9.52291	7.89119	7.97093	7.9018
10362811	Sesn1	sestrin 1	0	1.58	2.9897		10.6659	10.4277	10.7515	9.05112	9.07374	8.98099
10386636	Usp22	ubiquitin specific peptidase 22	0	1.58	2.9897		10.6559	10.6301	10.7032	9.14017	9.05119	9.06968
10496919	Usp33	ubiquitin specific peptidase 33	0	1.58	2.9897		10.1421	10.7092	10.2073	8.78245	8.84332	8.68673
10524460	Acacb	acetyl-Coenzyme A carboxylase beta	0	1.57	2.96905		8.42383	8.81835	8.37907	6.89267	7.05488	6.97201
10586844	Adam10	a disintegrin and metallopeptidase domain 10	0	1.57	2.96905		10.3033	10.3954	10.4717	8.87407	8.85028	8.74103
10424929	Adck5	aarF domain containing kinase 5	0	1.57	2.96905		9.38545	9.31205	9.30734	7.71612	7.82496	7.76074
10497188	Il7	interleukin 7	0	1.57	2.96905		6.52301	6.60668	6.49786	5.02031	5.13705	4.76929
10559687	Isoc2b	isochorismatase domain containing 2b	0	1.57	2.96905		8.60656	8.56623	8.3461	6.9777	6.87948	6.94611
10563323	Nucb1	nucleobindin 1	0	1.57	2.96905		10.2723	10.3894	10.1841	8.68245	8.71332	8.74516
10363860	Slc16a9	solute carrier family 16 (monocarboxylic acid transporters), member 9	0	1.57	2.96905		8.50801	8.89151	8.52165	6.89853	7.22525	7.09733
10386058	Sparc	secreted acidic cysteine rich glycoprotein	0	1.57	2.96905		12.6809	12.7926	12.6694	11.1664	11.0973	11.1546
10481135	Surf1	surfeit gene 1	0	1.57	2.96905		9.79713	9.81045	9.75443	8.22917	8.16226	8.26284
10358379	Trove2	TROVE domain family, member 2	0	1.57	2.96905		8.21045	8.46419	8.25448	6.73914	6.70759	6.78169
10338342			0.006	1.57	2.96905		3.91653	5.28431	5.12111	3.2815	3.14359	3.18023
10591022	4931406C07Rik	RIKEN cDNA 4931406C07 gene	0	1.56	2.94854		10.2551	10.3884	10.3541	8.79305	8.82513	8.69669
10548892	Arhgdib	Rho, GDP dissociation inhibitor (GDI) beta	0	1.56	2.94854		8.71848	8.39715	8.31748	6.95876	6.88755	6.89328
10594855	Cgnl1	cingulin-like 1	0	1.56	2.94854		9.34034	9.57042	9.27689	7.66178	7.82686	8.02196
10438626	Etv5	ets variant gene 5	0	1.56	2.94854		9.48141	9.50773	9.4096	7.85457	7.98223	7.87618
10467842	Got1	glutamate oxaloacetate transaminase 1, soluble	0	1.56	2.94854		9.99951	9.97512	10.4375	8.48992	8.56885	8.66722
10605766	Maged1	melanoma antigen, family D, 1	0	1.56	2.94854		11.1842	11.2684	11.1987	9.65273	9.60704	9.71064
10451123	Slc29a1	solute carrier family 29 (nucleoside transporters), member 1	0	1.56	2.94854		11.5277	11.6265	11.4822	10.0055	9.93114	10.0057
10528664	Smarcd3	SWI/SNF related, matrix associated, actin dependent regulator of chromatin, subfamily d, member 3	0	1.56	2.94854		8.87659	9.14985	8.83085	7.31067	7.289	7.58714
10393408	Tmc6	transmembrane channel-like gene family 6	0	1.56	2.94854		8.32325	8.3153	8.36942	6.81947	6.60548	6.89692
10404731	Tmem14c	transmembrane protein 14C	0	1.56	2.94854		9.65477	9.86898	9.94891	8.1652	8.27223	8.34087
10478424	Ywhab	tyrosine 3-monooxygenase/tryptophan 5-monooxygenase activation protein, beta polypeptide	0	1.56	2.94854		11.4428	11.5162	11.4313	9.96341	9.88023	9.86548
10340293			0	1.56	2.94854		11.9451	12.0185	11.8441	10.3834	10.3226	10.4318
10342747			0	1.56	2.94854		10.7802	10.578	10.5313	8.80324	9.04227	9.37896
10344155			0	1.56	2.94854		6.15605	6.14189	6.03466	4.1034	4.98027	4.57767
10437364	Adcy9	adenylate cyclase 9	0	1.55	2.92817		8.4179	8.63108	8.38323	6.90929	6.90251	6.97315
10536499	Cav1	caveolin 1, caveolae protein	0	1.55	2.92817		8.367	8.59121	8.17015	6.72576	7.02345	6.73543
10606083	Cited1	Cbp/p300-interacting transactivator with Glu/Asp-rich carboxy-terminal domain 1	0	1.55	2.92817		10.6661	10.487	10.4431	9.05332	8.95505	8.94988
10605328	Fam3a	family with sequence similarity 3, member A	0	1.55	2.92817		8.48523	8.74099	8.70088	7.23933	7.13161	6.90432
10543572	Impdh1	inosine 5'-phosphate dehydrogenase 1	0	1.55	2.92817		8.50029	8.44205	8.43804	6.89673	6.73252	7.09533
10473281	Itgav	integrin alpha V	0	1.55	2.92817		9.29159	9.36495	9.4303	7.84485	7.80481	7.78375
10598575	Lancl3	LanC lantibiotic synthetase component C-like 3 (bacterial)	0	1.55	2.92817		8.51317	8.45351	8.43108	6.83981	6.83234	7.07647
10555055	Ndufc2	NADH dehydrogenase (ubiquinone) 1, subcomplex unknown, 2	0	1.55	2.92817		11.5071	11.5465	11.6747	10.0058	9.95358	10.1148
10429754	Nrbp2	nuclear receptor binding protein 2	0	1.55	2.92817		8.69104	8.57752	8.56435	7.05723	7.06781	7.05799
10573637	Phkb	phosphorylase kinase beta	0	1.55	2.92817		9.84177	9.79473	9.82315	8.21981	8.36201	8.23523
10481920	Psmd5	proteasome (prosome, macropain) 26S subunit, non-ATPase, 5	0	1.55	2.92817		9.9575	9.99969	10.0148	8.5295	8.44013	8.34634
10429666	Pycrl	pyrroline-5-carboxylate reductase-like	0	1.55	2.92817		8.38556	8.26196	8.28765	6.79284	6.81654	6.68066
10427590	Slc1a3	solute carrier family 1 (glial high affinity glutamate transporter), member 3	0	1.55	2.92817		8.20171	8.0637	8.13342	6.49526	6.76871	6.47246
10382802	Sphk1	sphingosine kinase 1	0	1.55	2.92817		8.16814	8.1712	7.8747	6.62167	6.38842	6.55604
10513208	Svep1	sushi, von Willebrand factor type A, EGF and pentraxin domain containing 1	0	1.55	2.92817		8.16801	8.72411	8.21374	6.80215	7.03622	6.61518
10340129			0	1.55	2.92817		8.2977	8.4359	7.84367	7.19366	6.35798	6.36287
10343899			0.001	1.55	2.92817		5.89043	6.29019	6.37288	4.58561	5.19431	4.11011
10342868			0.001	1.55	2.92817		5.50099	6.11349	5.49715	4.20749	4.57342	3.68171
10342410			0.001	1.55	2.92817		6.94738	6.66113	6.66029	4.84943	5.92369	4.83087
10401667	0610007P14Rik	RIKEN cDNA 0610007P14 gene	0	1.54	2.90795		10.9999	10.6699	11.0639	9.4009	9.3785	9.33943
10434007	Aifm3	apoptosis-inducing factor, mitochondrion-associated 3	0	1.54	2.90795		7.96582	8.19052	8.08409	6.63162	6.3069	6.68124
10490559	Chrna4	cholinergic receptor, nicotinic, alpha polypeptide 4	0	1.54	2.90795		8.03847	8.3075	7.89504	6.53232	6.54223	6.53438
10544452	Fam115c	family with sequence similarity 115, member C	0	1.54	2.90795		7.23362	7.02525	7.21473	5.72978	5.54777	5.57726
10529206	Fndc4	fibronectin type III domain containing 4	0	1.54	2.90795		8.18651	7.93376	8.08736	6.55987	6.53669	6.50572
10498775	Golim4	golgi integral membrane protein 4	0	1.54	2.90795		7.75906	8.03027	7.85436	6.40942	6.31385	6.30629
10608650	H2-T9	histocompatibility 2, T region locus 9	0	1.54	2.90795		7.78751	7.86797	7.7391	6.20795	6.27794	6.28857
10525365	Hvcn1	hydrogen voltage-gated channel 1	0	1.54	2.90795		7.41871	7.27651	7.26882	5.89995	5.45197	5.98769
10377953	Kif1c	kinesin family member 1C	0	1.54	2.90795		8.47275	8.69199	8.4853	7.10892	6.89118	7.02396
10569972	Lass4	LAG1 homolog, ceramide synthase 4	0	1.54	2.90795		8.13698	8.2691	7.97199	6.5559	6.73018	6.46976
10499811	Npr1	natriuretic peptide receptor 1	0	1.54	2.90795		10.2125	10.5974	10.2969	8.91726	8.84529	8.71654
10452030	Plin3	perilipin 3	0	1.54	2.90795		10.152	10.1111	10.1478	8.56216	8.68724	8.54241
10488291	Rbbp9	retinoblastoma binding protein 9	0	1.54	2.90795		9.2171	9.08088	9.06886	7.50198	7.52964	7.70898
10361760	Timm8a1	translocase of inner mitochondrial membrane 8 homolog a1 (yeast)	0	1.54	2.90795		7.87342	7.86711	8.22225	6.51219	6.55279	6.28538
10556820	Tmem159	transmembrane protein 159	0	1.54	2.90795		9.16398	9.00967	9.01653	7.45877	7.42199	7.67662
10402225	Trip11	thyroid hormone receptor interactor 11	0	1.54	2.90795		10.2739	10.4873	10.3001	8.75708	9.03062	8.66841
10576661	Itgb1	integrin beta 1 (fibronectin receptor beta)	0	1.53	2.88786		10.614	10.6724	10.7391	9.1335	9.06849	9.24443
10607972	Kdm5d	lysine (K)-specific demethylase 5D	0	1.53	2.88786		7.60148	7.84954	7.6739	6.04747	6.14344	6.3305
10386191	Olfr329-ps	olfactory receptor 329, pseudogene	0	1.53	2.88786		7.58873	7.53754	7.69615	6.11549	6.06595	6.04249
10520950	Pdlim1	PDZ and LIM domain 1 (elfin)	0	1.53	2.88786		8.84828	8.77755	8.68195	7.18359	7.19867	7.34796
10467420	Pdlim1	PDZ and LIM domain 1 (elfin)	0	1.53	2.88786		8.91613	8.84186	8.90994	7.21809	7.56937	7.28296
10577792	Plekha2	pleckstrin homology domain-containing, family A (phosphoinositide binding specific) member 2	0	1.53	2.88786		7.74131	7.84428	7.68553	6.08829	6.22165	6.36243
10451943	Plin5	perilipin 5	0	1.53	2.88786		8.20217	8.23644	8.51013	6.76437	6.73584	6.84909
10390299	Pnpo	pyridoxine 5'-phosphate oxidase	0	1.53	2.88786		8.79175	8.69694	8.70339	7.31509	7.32325	6.97104
10505008	Slc44a1	solute carrier family 44, member 1	0	1.53	2.88786		9.08151	9.1941	9.17566	7.61767	7.476	7.78207
10340716			0	1.53	2.88786		8.77601	8.8533	8.79024	7.17791	7.53482	7.11363
10436304	Abi3bp	ABI gene family, member 3 (NESH) binding protein	0	1.52	2.86791		8.02163	8.0663	7.84276	6.50003	6.46505	6.40268
10523647	Aff1	AF4/FMR2 family, member 1	0	1.52	2.86791		8.85844	8.80426	8.69714	7.27462	7.27516	7.24135
10433389	Alg1	asparagine-linked glycosylation 1 homolog (yeast, beta-1,4-mannosyltransferase)	0	1.52	2.86791		9.78607	9.7186	9.83358	8.16139	8.24197	8.36448
10514177	Bnc2	basonuclin 2	0	1.52	2.86791		8.78524	8.79642	8.78626	7.35756	7.2864	7.17484
10346594	Cdk15	cyclin-dependent kinase 15	0	1.52	2.86791		7.98085	8.17725	7.8026	6.41148	6.62849	6.36491
10446207	Clpp	caseinolytic peptidase, ATP-dependent, proteolytic subunit homolog (E. coli)	0	1.52	2.86791		9.7132	9.67639	9.64877	8.0872	8.02979	8.35944
10457686	Dsc2	desmocollin 2	0	1.52	2.86791		6.46717	6.83266	6.48484	5.12982	5.15579	4.9287
10351623	F11r	F11 receptor	0	1.52	2.86791		10.384	10.2885	10.2614	8.7677	8.78189	8.83752
10595402	Fam46a	family with sequence similarity 46, member A	0	1.52	2.86791		7.04243	6.97422	7.17669	5.38175	5.65968	5.60156
10376889	Mmgt2	membrane magnesium transporter 2	0	1.52	2.86791		8.24215	8.40498	8.30241	6.84007	6.80532	6.7322
10371176	Nfic	nuclear factor I/C	0	1.52	2.86791		9.04656	9.61799	9.02559	7.81809	7.72756	7.57229
10505000	Nipsnap3b	nipsnap homolog 3B (C. elegans)	0	1.52	2.86791		8.14789	8.07137	8.23953	6.68553	6.71334	6.48813
10572070	Npy1r	neuropeptide Y receptor Y1	0	1.52	2.86791		6.41687	6.05	6.4048	4.82194	4.57531	4.92507
10403361	Pitrm1	pitrilysin metallepetidase 1	0	1.52	2.86791		10.1116	9.89174	10.0849	8.58156	8.46026	8.50106
10400844	Pygl	liver glycogen phosphorylase	0	1.52	2.86791		8.07386	8.18114	8.12555	6.43409	6.73563	6.63687
10460947	Pygm	muscle glycogen phosphorylase	0	1.52	2.86791		9.00275	8.80199	8.71925	7.44373	7.29836	7.2181
10591668	Rgl3	ral guanine nucleotide dissociation stimulator-like 3	0	1.52	2.86791		8.18794	8.63801	8.34097	6.83586	6.91798	6.84269
10529497	Sh3tc1	SH3 domain and tetratricopeptide repeats 1	0	1.52	2.86791		7.59463	8.12193	7.74363	6.27061	6.45931	6.17479
10389507	Tmem49	transmembrane protein 49	0	1.52	2.86791		10.3269	10.238	10.5038	8.79212	8.82285	8.89461
10344010			0	1.52	2.86791		11.0171	11.0979	11.465	9.68069	9.56983	9.76709
10383194			0	1.52	2.86791		9.13301	9.59267	9.25741	7.61801	7.92349	7.87959
10402766	Akt1	thymoma viral proto-oncogene 1	0	1.51	2.8481		10.3362	10.4942	10.3217	8.95815	8.84845	8.82001
10371332	Aldh1l2	aldehyde dehydrogenase 1 family, member L2	0	1.51	2.8481		7.20551	7.32499	7.15207	5.79644	5.56509	5.78964
10386652	Aldh3a2	aldehyde dehydrogenase family 3, subfamily A2	0	1.51	2.8481		10.4764	10.5508	10.5092	9.08954	9.08588	8.83598
10585699	Fabp5	fatty acid binding protein 5, epidermal	0	1.51	2.8481		8.50112	8.2843	8.23122	6.96781	6.79125	6.73455
10362394	Hddc2	HD domain containing 2	0	1.51	2.8481		8.3851	8.28772	8.26401	6.81209	6.95203	6.65712
10365716	Ikbip	IKBKB interacting protein	0	1.51	2.8481		7.81246	7.99807	7.81491	6.27502	6.33999	6.48691
10504106	Il11ra1	interleukin 11 receptor, alpha chain 1	0	1.51	2.8481		8.86193	8.88256	8.81005	7.32183	7.35882	7.34304
10396306	Jkamp	JNK1/MAPK8-associated membrane protein	0	1.51	2.8481		9.10364	9.30407	9.26177	7.61817	7.66142	7.8651
10529082	Mpv17	MpV17 mitochondrial inner membrane protein	0	1.51	2.8481		9.02125	9.09582	8.92423	7.43384	7.48326	7.60228
10603346	Plp2	proteolipid protein 2	0	1.51	2.8481		8.8533	8.78575	8.73425	7.24131	7.21128	7.40243
10411359	Plp2	proteolipid protein 2	0	1.51	2.8481		8.85564	8.80538	8.7038	7.22955	7.22122	7.38952
10508479	Ptp4a2	protein tyrosine phosphatase 4a2	0	1.51	2.8481		11.3069	11.4006	11.4311	9.90248	9.76346	9.93161
10342586			0.006	1.51	2.8481		6.18313	7.18138	6.52998	5.32143	4.99622	5.04204
10468309	2310014D11Rik	RIKEN cDNA 2310014D11 gene	0	1.5	2.82843		7.33204	7.49895	7.63001	5.94468	6.0674	5.93791
10397763	9030617O03Rik	RIKEN cDNA 9030617O03 gene	0	1.5	2.82843		8.14262	8.03989	7.79733	6.6004	6.48912	6.38654
10592655	Arhgef12	Rho guanine nucleotide exchange factor (GEF) 12	0	1.5	2.82843		10.3662	10.4965	10.3257	8.87648	8.97483	8.83556
10497931	Cflar	CASP8 and FADD-like apoptosis regulator	0	1.5	2.82843		8.51653	8.39937	8.49326	6.99502	6.95945	6.96123
10545891	Cml1	camello-like 1	0	1.5	2.82843		7.74691	7.61716	7.61123	6.06377	6.12641	6.27674
10574471	Cmtm3	CKLF-like MARVEL transmembrane domain containing 3	0	1.5	2.82843		9.79114	10.1192	9.8311	8.39799	8.31433	8.52359
10494262	Ctsk	cathepsin K	0	1.5	2.82843		7.35842	7.56667	7.32194	6.02163	5.86251	5.85877
10596893	Dag1	dystroglycan 1	0	1.5	2.82843		10.451	10.6471	10.4626	9.06582	8.92354	9.06543
10409099	Fam120a	family with sequence similarity 120, member A	0	1.5	2.82843		9.94943	10.1495	9.94791	8.61519	8.48924	8.44331
10581772	Glg1	golgi apparatus protein 1	0	1.5	2.82843		10.6196	10.7743	10.6913	9.23236	9.22784	9.13799
10453797	Greb1l	growth regulation by estrogen in breast cancer-like	0	1.5	2.82843		7.58449	7.74447	7.44003	5.98918	6.174	6.10467
10416279	Lgi3	leucine-rich repeat LGI family, member 3	0	1.5	2.82843		7.51834	7.75139	7.5848	6.17369	6.06134	6.12503
10473861	Pacsin3	protein kinase C and casein kinase substrate in neurons 3	0	1.5	2.82843		8.56865	8.83691	8.65508	7.13792	7.12086	7.28958
10391301	Stat3	signal transducer and activator of transcription 3	0	1.5	2.82843		10.1169	10.3703	10.2905	8.79884	8.79759	8.69072
10565609	Thrsp	thyroid hormone responsive SPOT14 homolog (Rattus)	0	1.5	2.82843		7.99555	7.56785	7.8356	6.25996	5.96298	6.68037
10338180			0	1.5	2.82843		11.1042	10.9977	10.9283	9.51792	9.62179	9.3916
10340177			0	1.5	2.82843		12.6626	12.8081	12.7572	11.2345	11.1737	11.3246
10344325			0	1.5	2.82843		9.50451	9.74956	9.7876	8.14849	8.21968	8.18664
10342848			0	1.5	2.82843		4.96749	4.78299	5.45456	3.42335	3.75429	3.51572
10413220			0	1.5	2.82843		8.84629	9.62514	9.30755	7.68215	7.76228	7.84518
10338158			0.002	1.5	2.82843		4.2462	3.64144	4.48853	2.36182	2.898	2.61524
10441400	Arid1b	AT rich interactive domain 1B (SWI-like)	0	1.49	2.80889		9.2678	9.37123	9.19771	7.82676	7.79358	7.73471
10590801	Birc3	baculoviral IAP repeat-containing 3	0	1.49	2.80889		8.012	8.00108	7.93864	6.79315	6.51777	6.18042
10496605	Ccbl2	cysteine conjugate-beta lyase 2	0	1.49	2.80889		9.12396	9.25949	9.19861	7.71177	7.78498	7.61224
10381122	Fkbp10	FK506 binding protein 10	0	1.49	2.80889		9.25266	9.35187	9.24179	7.72316	7.81892	7.84598
10509500	Hp1bp3	heterochromatin protein 1, binding protein 3	0	1.49	2.80889		10.5713	10.5871	10.5435	9.07553	9.12605	9.01875
10420080	Mdp1	magnesium-dependent phosphatase 1	0	1.49	2.80889		8.5861	8.49286	8.60866	7.08304	7.12095	7.0048
10483809	Nfe2l2	nuclear factor, erythroid derived 2, like 2	0	1.49	2.80889		9.94258	9.99841	9.81056	8.4887	8.44988	8.34045
10504017	Nfx1	nuclear transcription factor, X-box binding 1	0	1.49	2.80889		10.6377	10.6548	10.5576	9.13703	9.13668	9.10404
10408689	Nrn1	neuritin 1	0	1.49	2.80889		7.73002	7.75872	7.79587	6.40039	6.0183	6.40491
10517988	Slc25a34	solute carrier family 25, member 34	0	1.49	2.80889		7.53473	7.62529	7.51361	5.91415	6.29965	5.97881
10363231	Smpdl3a	sphingomyelin phosphodiesterase, acid-like 3A	0	1.49	2.80889		9.60382	9.82196	9.76259	8.33048	8.215	8.17952
10545450	Tgoln1	trans-golgi network protein	0	1.49	2.80889		11.5879	11.6519	11.6703	10.1887	10.15	10.1037
10588466	Twf2	twinfilin, actin-binding protein, homolog 2 (Drosophila)	0	1.49	2.80889		8.82282	8.95048	8.83437	7.32516	7.4718	7.34558
10534531	Ywhag	tyrosine 3-monooxygenase/tryptophan 5-monooxygenase activation protein, gamma polypeptide	0	1.49	2.80889		9.90248	10.1214	10.0982	8.61526	8.49261	8.53421
10376094			0	1.49	2.80889		9.07683	8.93254	8.98893	7.47449	7.52254	7.53479
10409684			0	1.49	2.80889		9.53679	9.557	9.59915	8.03783	8.07617	8.10951
10565567			0	1.49	2.80889		8.39642	8.936	8.3863	6.96166	7.29535	6.98284
10379953	4632419I22Rik	RIKEN cDNA 4632419I22 gene	0	1.48	2.78949		8.0336	8.3383	8.29212	6.7685	6.76009	6.70676
10525893	Aacs	acetoacetyl-CoA synthetase	0	1.48	2.78949		9.63276	9.58352	10.0602	8.2083	8.20752	8.43531
10523670	Aff1	AF4/FMR2 family, member 1	0	1.48	2.78949		7.42891	7.15243	7.3863	5.89186	5.70528	5.93614
10571774	Aga	aspartylglucosaminidase	0	1.48	2.78949		9.44903	9.49473	9.44054	7.92991	7.97663	8.0344
10534889	Agfg2	ArfGAP with FG repeats 2	0	1.48	2.78949		9.62497	9.68224	9.66603	8.09966	8.18454	8.2611
10554789	Ctsc	cathepsin C	0	1.48	2.78949		8.5604	8.82201	8.85198	7.326	7.20607	7.27572
10512334	Gm13305	predicted gene 13305	0	1.48	2.78949		8.75801	8.7818	8.7259	7.24767	7.32478	7.2634
10512356	Gm13305	predicted gene 13305	0	1.48	2.78949		8.75801	8.7818	8.7259	7.24767	7.32478	7.2634
10407803	Gpr137b	G protein-coupled receptor 137B	0	1.48	2.78949		7.22625	7.2644	7.33025	5.88674	5.808	5.69757
10509137	Hmgcl	3-hydroxy-3-methylglutaryl-Coenzyme A lyase	0	1.48	2.78949		9.28139	9.2966	9.38152	7.8531	7.7101	7.96999
10427125	Igfbp6	insulin-like growth factor binding protein 6	0	1.48	2.78949		10.4613	10.3315	10.4116	8.88861	8.84625	9.04233
10502778	Lphn2	latrophilin 2	0	1.48	2.78949		7.05774	6.92177	7.01089	5.33899	5.58534	5.62105
10457508	Npc1	Niemann Pick type C1	0	1.48	2.78949		8.94977	9.22739	8.98525	7.43699	7.71384	7.57975
10525439	P2rx4	purinergic receptor P2X, ligand-gated ion channel 4	0	1.48	2.78949		8.97788	9.03799	9.00331	7.45404	7.50565	7.61468
10420071	Tm9sf1	transmembrane 9 superfamily member 1	0	1.48	2.78949		9.47464	9.45275	9.55693	7.95681	7.94673	8.13687
10539653	Tprkb	Tp53rk binding protein	0	1.48	2.78949		8.85469	8.99858	9.0282	7.33613	7.63545	7.47951
10340488			0	1.48	2.78949		9.76403	9.96201	9.92846	8.34699	8.57933	8.29531
10338475			0	1.48	2.78949		9.63424	9.60702	9.52649	8.11906	8.1498	8.06943
10341268			0	1.48	2.78949		5.22576	5.58535	5.38622	4.25181	3.34172	4.15152
10340699			0.006	1.48	2.78949		4.72379	5.99968	4.68782	3.39811	3.71831	3.85549
10340773			0.011	1.48	2.78949		5.8411	5.87994	5.84403	4.72806	4.75858	3.63962
10338212			0.034	1.48	2.78949		4.47477	5.64066	4.20038	3.60807	3.73271	2.54521
10460263	Acy3	aspartoacylase (aminoacylase) 3	0	1.47	2.77022		9.17787	9.27297	9.05671	7.59372	7.81339	7.70013
10468668	Afap1l2	actin filament associated protein 1-like 2	0	1.47	2.77022		7.32123	8.25316	7.74455	6.27574	6.39992	6.24118
10403273	Asb13	ankyrin repeat and SOCS box-containing 13	0	1.47	2.77022		8.04179	8.03822	7.92107	6.44094	6.42539	6.71779
10606263	Atrx	alpha thalassemia/mental retardation syndrome X-linked homolog (human)	0	1.47	2.77022		8.35207	8.20613	8.17764	6.77404	6.81698	6.72746
10404521	Bphl	biphenyl hydrolase-like (serine hydrolase, breast epithelial mucin-associated antigen)	0	1.47	2.77022		8.79311	8.82414	8.78626	7.24753	7.3911	7.36386
10550574	Dmpk	dystrophia myotonica-protein kinase	0	1.47	2.77022		9.40105	9.48017	9.26935	7.81755	8.05355	7.8602
10461844	Gnaq	guanine nucleotide binding protein, alpha q polypeptide	0	1.47	2.77022		9.14793	9.33538	9.17184	7.74866	7.76547	7.73775
10454286	Mapre2	microtubule-associated protein, RP/EB family, member 2	0	1.47	2.77022		9.16375	9.19994	9.20053	7.63178	7.674	7.86144
10358434	Pla2g4a	phospholipase A2, group IVA (cytosolic, calcium-dependent)	0	1.47	2.77022		7.60803	7.54531	7.744	6.16544	6.20717	6.11729
10512766	Trim14	tripartite motif-containing 14	0	1.47	2.77022		9.64979	8.99106	9.40035	7.8921	7.98722	7.75311
10482448	Zeb2	zinc finger E-box binding homeobox 2	0	1.47	2.77022		8.55846	8.58701	8.6192	7.1446	7.11086	7.09743
10338201			0.019	1.47	2.77022		5.69269	6.75416	6.4482	4.63943	5.75125	4.09737
10339284			0.023	1.47	2.77022		5.37894	5.78297	5.83294	3.89204	4.36892	4.33872
10420988	Dpysl2	dihydropyrimidinase-like 2	0	1.46	2.75108		9.9927	9.82069	9.93013	8.43443	8.50912	8.41199
10471655	Gsn	gelsolin	0	1.46	2.75108		10.7704	10.8105	10.7178	9.27691	9.34293	9.29183
10497173	Pxmp3	peroxisomal membrane protein 3	0	1.46	2.75108		8.10389	8.46648	8.55121	6.84736	7.10124	6.79239
10377372	Slc25a35	solute carrier family 25, member 35	0	1.46	2.75108		9.24141	9.3493	9.1994	7.71605	7.80573	7.8971
10370510	Syde1	synapse defective 1, Rho GTPase, homolog 1 (C. elegans)	0	1.46	2.75108		7.59743	7.87073	7.56178	6.41825	6.10671	6.13559
10600357	Taz	tafazzin	0	1.46	2.75108		8.4351	8.54144	8.49062	7.19414	7.0738	6.81989
10512499	Tpm2	tropomyosin 2, beta	0	1.46	2.75108		8.46964	8.50205	8.47887	7.00986	7.04808	6.99949
10435769	Zbtb20	zinc finger and BTB domain containing 20	0	1.46	2.75108		9.23118	9.43354	9.07675	7.65109	7.98018	7.71521
10457587	Zfp521	zinc finger protein 521	0	1.46	2.75108		7.06593	7.27764	6.93331	5.53963	5.77029	5.59225
10344447			0	1.46	2.75108		10.551	10.4646	10.51	9.08528	9.01852	9.04802
10383210			0	1.46	2.75108		8.54079	8.81853	8.77639	7.23569	7.3359	7.19741
10338701			0	1.46	2.75108		6.56783	6.58924	6.27289	4.80335	4.78814	5.4441
10338976			0.004	1.46	2.75108		6.30453	7.28754	6.52893	4.72518	5.72274	5.28682
10339053			0.01	1.46	2.75108		5.15497	5.18367	5.44077	3.17244	4.9018	3.31703
10351414	Aldh9a1	aldehyde dehydrogenase 9, subfamily A1	0	1.45	2.73208		11.2122	11.215	11.2773	9.77473	9.79779	9.79663
10604226	C1galt1c1	C1GALT1-specific chaperone 1	0	1.45	2.73208		7.29835	7.73068	7.8221	6.112	6.00776	6.37486
10452316	C3	complement component 3	0	1.45	2.73208		8.82964	9.4141	9.31867	7.72919	7.66111	7.83064
10436967	Cbr1	carbonyl reductase 1	0	1.45	2.73208		10.2475	10.3178	10.3776	8.9577	8.91446	8.7183
10597461	Cmtm7	CKLF-like MARVEL transmembrane domain containing 7	0	1.45	2.73208		8.35952	8.27072	8.44961	6.85589	6.74218	7.14165
10440929	Gart	phosphoribosylglycinamide formyltransferase	0	1.45	2.73208		10.6471	10.6675	10.8456	9.26804	9.2333	9.31894
10408227	Hfe	hemochromatosis	0	1.45	2.73208		9.3084	9.20252	9.43332	7.94029	7.73909	7.92861
10460666	Ltbp3	latent transforming growth factor beta binding protein 3	0	1.45	2.73208		8.97174	9.38193	8.95742	7.74666	7.60966	7.60311
10384985	Rhbdf1	rhomboid family 1 (Drosophila)	0	1.45	2.73208		8.20264	8.45389	8.15021	6.82472	6.7838	6.85916
10419073	Tspan14	tetraspanin 14	0	1.45	2.73208		9.01958	8.87536	8.96322	7.52208	7.37924	7.60282
10418171	Zcchc24	zinc finger, CCHC domain containing 24	0	1.45	2.73208		7.73663	8.26558	7.85995	6.51796	6.38417	6.62153
10342675			0	1.45	2.73208		12.2027	12.2402	12.1306	10.8315	10.8055	10.5797
10365830			0	1.45	2.73208		9.78039	9.40526	9.8103	8.08059	8.21067	8.34852
10457203			0	1.45	2.73208		8.45666	8.18746	8.53725	6.95523	7.21506	6.65911
10344269			0.018	1.45	2.73208		7.00262	6.51478	6.47624	5.12608	5.60594	4.89912
10487476	1500011K16Rik	RIKEN cDNA 1500011K16 gene	0	1.44	2.71321		8.56025	8.43309	8.50285	7.04459	7.01085	7.10923
10377605	1810027O10Rik	RIKEN cDNA 1810027O10 gene	0	1.44	2.71321		7.54157	7.38881	7.46417	5.91948	5.94005	6.216
10501832	Abcd3	ATP-binding cassette, sub-family D (ALD), member 3	0	1.44	2.71321		10.4272	10.3624	10.6689	8.97907	9.02913	9.1268
10367717	BC013529	cDNA sequence BC013529	0	1.44	2.71321		9.65358	9.48479	9.58676	8.23191	8.19244	7.99024
10604932	Cd99l2	CD99 antigen-like 2	0	1.44	2.71321		9.0401	9.10209	8.9987	7.53587	7.67972	7.59513
10607848	Egfl6	EGF-like-domain, multiple 6	0	1.44	2.71321		6.25112	6.94759	6.67945	5.13183	5.22651	5.20641
10605392	F8	coagulation factor VIII	0	1.44	2.71321		7.58436	7.96985	7.84218	6.41806	6.49887	6.14939
10490838	Fabp5	fatty acid binding protein 5, epidermal	0	1.44	2.71321		8.35298	8.18816	8.10322	7.00436	6.68857	6.62283
10393970	Fasn	fatty acid synthase	0	1.44	2.71321		10.2354	10.7342	10.579	9.10234	9.09075	9.04091
10494565	Fmo5	flavin containing monooxygenase 5	0	1.44	2.71321		7.99928	8.34043	7.81097	6.47326	6.65827	6.708
10571233	Fut10	fucosyltransferase 10	0	1.44	2.71321		7.93194	8.08833	8.0018	6.59164	6.64206	6.45935
10577882	Hgsnat	heparan-alpha-glucosaminide N-acetyltransferase	0	1.44	2.71321		11.0211	10.8857	11.0799	9.55424	9.46854	9.65132
10540408	Itpr1	inositol 1,4,5-triphosphate receptor 1	0	1.44	2.71321		9.55088	9.67051	9.64857	8.23364	8.17973	8.14947
10552562	Klk1b1	kallikrein 1-related peptidase b1	0.009	1.44	2.71321		6.00956	5.25242	4.62375	3.74777	3.62951	4.19006
10360205	Ncstn	nicastrin	0	1.44	2.71321		11.1232	11.2997	11.1409	9.85965	9.62931	9.76615
10363350	P4ha1	procollagen-proline, 2-oxoglutarate 4-dioxygenase (proline 4-hydroxylase), alpha 1 polypeptide	0	1.44	2.71321		9.6546	9.7609	9.93983	8.2955	8.34462	8.40207
10482139	Pdcl	phosducin-like	0	1.44	2.71321		9.90143	9.85643	10.068	8.45115	8.47396	8.58637
10542965	Sgce	sarcoglycan, epsilon	0	1.44	2.71321		9.67838	9.47518	9.42131	8.03397	8.00169	8.21756
10400984	Tmem30b	transmembrane protein 30B	0	1.44	2.71321		7.47585	7.48185	7.50863	6.31648	5.58925	6.25475
10343379			0	1.44	2.71321		11.2088	11.4137	11.1408	9.88043	9.77717	9.78991
10342171			0	1.44	2.71321		11.1081	11.1549	11.03	9.70686	9.93167	9.33756
10338663			0.025	1.44	2.71321		4.43637	5.67685	5.31765	2.7758	4.61524	3.73438
10419416	3632451O06Rik	RIKEN cDNA 3632451O06 gene	0	1.43	2.69447		6.03776	6.12873	6.00335	4.80533	4.27566	4.78549
10352503	Bpnt1	bisphosphate 3'-nucleotidase 1	0	1.43	2.69447		10.6604	10.2738	10.6533	9.13147	8.96999	9.18869
10437590	Carhsp1	calcium regulated heat stable protein 1	0	1.43	2.69447		9.82349	9.74327	9.88121	8.33658	8.44786	8.35988
10370413	D10Jhu81e	DNA segment, Chr 10, Johns Hopkins University 81 expressed	0	1.43	2.69447		10.0803	10.0638	9.94311	8.57505	8.57043	8.63797
10415262	Dcaf11	DDB1 and CUL4 associated factor 11	0	1.43	2.69447		10.4464	10.3652	10.3568	8.91545	9.01215	8.94571
10512067	Ddx58	DEAD (Asp-Glu-Ala-Asp) box polypeptide 58	0	1.43	2.69447		8.27717	8.40573	8.33322	6.92821	7.09973	6.6844
10603567	Dynlt3	dynein light chain Tctex-type 3	0	1.43	2.69447		9.55736	9.56676	9.67209	8.11921	8.11734	8.26409
10503602	Fbxl4	F-box and leucine-rich repeat protein 4	0	1.43	2.69447		6.83186	6.97252	6.87651	5.38496	5.56183	5.44893
10449581	Mtch1	mitochondrial carrier homolog 1 (C. elegans)	0	1.43	2.69447		10.4881	10.4589	10.3664	8.97108	8.89393	9.15273
10468311	Sh3pxd2a	SH3 and PX domains 2A	0	1.43	2.69447		7.95766	7.58898	7.73402	6.3324	6.25274	6.39782
10474671	Spred1	sprouty protein with EVH-1 domain 1, related sequence	0	1.43	2.69447		9.08226	9.31782	8.98891	7.75352	7.70013	7.63532
10598882	Uba1	ubiquitin-like modifier activating enzyme 1	0	1.43	2.69447		12.8816	12.9202	12.9453	11.4959	11.4527	11.5218
10339589			0	1.43	2.69447		11.2142	11.2532	11.2669	9.76926	9.76853	9.89913
10511923			0	1.43	2.69447		8.2258	8.37813	8.26109	6.7799	6.7961	7.00796
10342170			0	1.43	2.69447		9.83722	9.98412	10.2044	8.48261	8.51716	8.74446
10504761			0	1.43	2.69447		6.50993	5.93018	6.22816	4.84177	4.908	4.6174
10371904	1110012L19Rik	RIKEN cDNA 1110012L19 gene	0	1.42	2.67586		7.57233	7.6094	7.63215	6.25133	6.18795	6.12307
10566333	9230105E10Rik	RIKEN cDNA 9230105E10 gene	0	1.42	2.67586		7.40813	7.51068	7.41767	5.87143	6.1087	6.10432
10586744	Anxa2	annexin A2	0	1.42	2.67586		10.8919	10.7797	10.7017	9.36973	9.36324	9.36753
10347193	Atic	5-aminoimidazole-4-carboxamide ribonucleotide formyltransferase/IMP cyclohydrolase	0	1.42	2.67586		9.98363	10.0438	10.1068	8.58179	8.63768	8.65818
10455372	C330007P06Rik	RIKEN cDNA C330007P06 gene	0	1.42	2.67586		8.94608	9.01685	9.0865	7.52876	7.72264	7.5464
10603289	Clcn5	chloride channel 5	0	1.42	2.67586		9.34799	9.29351	9.59226	7.96573	7.95037	8.04697
10501208	Gstm6	glutathione S-transferase, mu 6	0	1.42	2.67586		10.3027	10.2467	10.2238	8.83264	8.94285	8.74298
10406423	Mblac2	metallo-beta-lactamase domain containing 2	0	1.42	2.67586		9.02474	8.72656	9.37249	7.49901	7.7601	7.59324
10371784	Nr1h4	nuclear receptor subfamily 1, group H, member 4	0	1.42	2.67586		6.95011	6.71714	6.71899	5.4004	5.26396	5.45404
10394534	Osr1	odd-skipped related 1 (Drosophila)	0	1.42	2.67586		8.04524	7.76304	7.78288	6.3079	6.42582	6.58259
10487267	Polr2l	polymerase (RNA) II (DNA directed) polypeptide L	0	1.42	2.67586		11.1382	11.2469	11.2064	9.75674	9.70235	9.88704
10442155	Ppp2r1a	protein phosphatase 2 (formerly 2A), regulatory subunit A (PR 65), alpha isoform	0	1.42	2.67586		10.9538	10.7928	10.8926	9.47897	9.3919	9.52204
10547916	Ptms	parathymosin	0	1.42	2.67586		9.95434	10.0341	9.68767	8.37278	8.30852	8.73874
10513957	Ptprd	protein tyrosine phosphatase, receptor type, D	0	1.42	2.67586		9.26476	9.82717	9.50215	8.08855	8.1711	8.07987
10607658	Reps2	RALBP1 associated Eps domain containing protein 2	0	1.42	2.67586		8.59269	8.67378	8.45971	7.22854	7.25114	6.98738
10507594	Slc2a1	solute carrier family 2 (facilitated glucose transporter), member 1	0	1.42	2.67586		9.63102	9.69608	9.7044	8.32139	8.14927	8.30641
10600547	Tbl1x	transducin (beta)-like 1 X-linked	0	1.42	2.67586		9.87056	10.1648	9.68888	8.60134	8.51843	8.34598
10596148	Trf	transferrin	0	1.42	2.67586		9.88613	10.1894	9.75366	8.38703	8.66354	8.51447
10338956			0.004	1.42	2.67586		3.97646	4.59976	4.16318	2.34402	3.15961	2.9706
10344229			0.005	1.42	2.67586		6.78808	7.69047	7.46052	5.54079	6.39434	5.73314
10344252			0.013	1.42	2.67586		4.44732	5.0092	4.47831	3.06814	3.89932	2.70762
10400321	1110002B05Rik	RIKEN cDNA 1110002B05 gene	0	1.41	2.65737		10.1873	10.0651	10.3621	8.69854	8.77617	8.91713
10590844	Arhgap42	Rho GTPase activating protein 42	0	1.41	2.65737		8.08719	7.88807	8.25781	6.5968	6.82444	6.56692
10488642	Defb19	defensin beta 19	0	1.41	2.65737		12.0313	12.0784	12.0308	10.5857	10.5227	10.7961
10360789	Degs1	degenerative spermatocyte homolog 1 (Drosophila)	0	1.41	2.65737		9.78282	9.84328	9.96893	8.38577	8.48323	8.50608
10353192	Eya1	eyes absent 1 homolog (Drosophila)	0	1.41	2.65737		8.07753	7.42913	7.57355	6.40998	6.19159	6.25231
10559233	Mrpl23	mitochondrial ribosomal protein L23	0	1.41	2.65737		9.82724	9.72344	9.74688	8.37612	8.32727	8.37093
10395259	Nampt	nicotinamide phosphoribosyltransferase	0	1.41	2.65737		9.91737	9.84044	10.1792	8.57827	8.57275	8.56176
10455238	Ndfip1	Nedd4 family interacting protein 1	0	1.41	2.65737		11.9413	11.9924	11.9871	10.5724	10.5304	10.5812
10390271	Nfe2l1	nuclear factor, erythroid derived 2,-like 1	0	1.41	2.65737		10.3562	10.4811	10.4248	8.96944	8.98696	9.07482
10428089	Nipal2	NIPA-like domain containing 2	0	1.41	2.65737		6.82285	6.97989	7.05302	5.49803	5.66759	5.45565
10522009	Pgm1	phosphoglucomutase 1	0	1.41	2.65737		7.42529	7.42133	7.49825	6.25502	5.89387	5.97242
10493798	S100a16	S100 calcium binding protein A16	0	1.41	2.65737		8.67623	8.6157	8.48894	7.41104	7.15177	6.98188
10536917	Smo	smoothened homolog (Drosophila)	0	1.41	2.65737		8.93667	8.95019	8.77919	7.54896	7.27607	7.62281
10471457	St6galnac4	ST6 (alpha-N-acetyl-neuraminyl-2,3-beta-galactosyl-1,3)-N-acetylgalactosaminide alpha-2,6-sialyltransferase 4	0	1.41	2.65737		7.57096	7.57407	7.38897	6.19146	6.19924	5.92402
10365482	Timp3	tissue inhibitor of metalloproteinase 3	0	1.41	2.65737		10.3571	10.5632	10.4657	9.07652	9.05306	9.02993
10474064	Trp53i11	transformation related protein 53 inducible protein 11	0	1.41	2.65737		10.486	10.6988	10.443	9.02843	9.12801	9.23885
10343866			0	1.41	2.65737		8.65761	8.19185	8.20585	6.88042	6.83237	7.12485
10342288			0	1.41	2.65737		6.27043	5.80507	5.96836	4.6221	4.2342	4.94558
10474977	1500003O03Rik	RIKEN cDNA 1500003O03 gene	0	1.4	2.63902		11.1277	11.1051	11.0269	9.62237	9.75296	9.6942
10375864	Agxt2l2	alanine-glyoxylate aminotransferase 2-like 2	0	1.4	2.63902		8.51843	8.39151	8.62147	7.04214	7.23896	7.0534
10378802	Blmh	bleomycin hydrolase	0	1.4	2.63902		9.8996	9.98293	9.83893	8.5159	8.55607	8.46074
10450242	C4b	complement component 4B (Childo blood group)	0	1.4	2.63902		9.30448	9.5541	9.51497	7.81862	8.21844	8.13912
10460312	Cdk2ap2	CDK2-associated protein 2	0	1.4	2.63902		9.61744	9.4355	9.57686	8.16801	8.21012	8.05663
10449295	Cuta	cutA divalent cation tolerance homolog (E. coli)	0	1.4	2.63902		10.6487	10.6746	10.5251	9.23381	9.05841	9.35152
10592237	Ei24	etoposide induced 2.4 mRNA	0	1.4	2.63902		10.2141	10.0214	10.2422	8.87152	8.59407	8.80157
10499483	Fdps	farnesyl diphosphate synthetase	0	1.4	2.63902		11.479	11.1805	11.3545	9.96601	9.89067	9.94463
10464445	Gm5521	mortality factor 4 like 2 pseudogene	0	1.4	2.63902		9.38106	9.57953	9.58882	8.19594	8.15765	8.00739
10542836	Klhdc5	kelch domain containing 5	0	1.4	2.63902		8.51334	8.56128	8.45331	7.08957	7.08451	7.15971
10598638	Mid1ip1	Mid1 interacting protein 1 (gastrulation specific G12-like (zebrafish))	0	1.4	2.63902		9.36747	9.35281	9.36989	7.85339	8.06889	7.96704
10565067	Nmb	neuromedin B	0	1.4	2.63902		8.04334	8.21647	8.11363	6.64587	6.93525	6.60111
10440406	Nrip1	nuclear receptor interacting protein 1	0	1.4	2.63902		8.9114	8.95862	8.87791	7.43419	7.56971	7.53588
10344707	Pcmtd1	protein-L-isoaspartate (D-aspartate) O-methyltransferase domain containing 1	0	1.4	2.63902		8.808	8.82993	8.67937	7.23937	7.48522	7.38263
10375893	Sar1b	SAR1 gene homolog B (S. cerevisiae)	0	1.4	2.63902		11.027	11.1181	11.3335	9.74071	9.63294	9.89895
10595189	Slc17a5	solute carrier family 17 (anion/sugar transporter), member 5	0	1.4	2.63902		8.56522	8.54893	8.56113	6.93881	7.22601	7.30044
10539080	St3gal5	ST3 beta-galactoside alpha-2,3-sialyltransferase 5	0	1.4	2.63902		10.9531	10.9404	10.9288	9.59385	9.51591	9.50519
10553140	Tmem143	transmembrane protein 143	0	1.4	2.63902		8.33906	8.1895	8.33028	6.71592	7.18044	6.7716
10345058	Tmem14a	transmembrane protein 14A	0	1.4	2.63902		6.8775	7.11525	7.14617	5.56817	5.44765	5.91129
10436487	Vgll3	vestigial like 3 (Drosophila)	0	1.4	2.63902		10.0649	9.65605	9.81791	8.52705	8.32575	8.48873
10342242			0.002	1.4	2.63902		4.78736	5.4651	4.41449	3.38753	3.39227	3.69201
10339054			0.021	1.4	2.63902		4.06342	4.49216	4.5852	2.60275	3.76853	2.56949
10480601	A830007P12Rik	RIKEN cDNA A830007P12 gene	0	1.39	2.62079		8.02226	7.93166	7.93813	6.784	6.43525	6.502
10523451	Anxa3	annexin A3	0	1.39	2.62079		7.66504	7.67714	7.98011	6.56565	6.26098	6.33042
10601771	Armcx1	armadillo repeat containing, X-linked 1	0	1.39	2.62079		7.99148	7.95215	8.13311	6.52517	6.586	6.7908
10360806	Capn2	calpain 2	0	1.39	2.62079		8.56163	8.56909	8.59612	7.15776	7.29225	7.10593
10606513	Chm	choroidermia	0	1.39	2.62079		8.6438	8.74013	8.71151	7.27699	7.37342	7.28403
10438340	Comt1	catechol-O-methyltransferase 1	0	1.39	2.62079		9.271	9.26897	9.31871	7.87485	7.90927	7.90428
10472097	Fmnl2	formin-like 2	0	1.39	2.62079		8.69769	9.02336	8.87432	7.46471	7.53904	7.42061
10475630	Galk2	galactokinase 2	0	1.39	2.62079		8.83094	8.92955	9.01205	7.50691	7.67974	7.416
10577164	Gas6	growth arrest specific 6	0	1.39	2.62079		10.5958	10.4521	10.5197	9.06001	9.12082	9.20267
10362511	Gstm3	glutathione S-transferase, mu 3	0	1.39	2.62079		12.1495	12.1258	11.9936	10.8031	10.8001	10.5
10572897	Hmox1	heme oxygenase (decycling) 1	0.001	1.39	2.62079		8.76446	9.01242	8.95509	7.63549	7.45997	7.45454
10483786	Mrpl23	mitochondrial ribosomal protein L23	0	1.39	2.62079		9.60807	9.50098	9.52507	8.15608	8.0953	8.21108
10605172	Naa10	N(alpha)-acetyltransferase 10, NatA catalytic subunitNalpha acetyltransferase 10	0	1.39	2.62079		8.41352	8.28257	8.12721	7.02298	6.97439	6.64595
10569200	Polr2l	polymerase (RNA) II (DNA directed) polypeptide L	0	1.39	2.62079		11.2658	11.3532	11.3308	9.88438	9.85106	10.0424
10399908	Prkar2b	protein kinase, cAMP dependent regulatory, type II beta	0.002	1.39	2.62079		8.80591	8.51694	9.38962	7.40585	7.55017	7.59035
10463670	Sfxn2	sideroflexin 2	0	1.39	2.62079		8.08634	8.19173	8.22364	6.68311	6.81215	6.83655
10419874	Slc22a17	solute carrier family 22 (organic cation transporter), member 17	0	1.39	2.62079		9.11599	9.02367	8.98833	7.81398	7.60716	7.54435
10520718	Snx17	sorting nexin 17	0	1.39	2.62079		10.4633	10.5233	10.5535	9.07897	9.09115	9.19545
10540105	Tmem43	transmembrane protein 43	0	1.39	2.62079		9.42711	9.33691	9.3999	7.93704	8.141	7.92036
10339177			0	1.39	2.62079		11.0058	11.0225	10.9927	9.62437	9.59035	9.64084
10342143			0.001	1.39	2.62079		8.00885	8.28281	7.63078	6.26838	7.14543	6.33756
10341154			0.007	1.39	2.62079		6.14047	6.0423	5.68578	4.57857	5.24191	3.88868
10339407			0.011	1.39	2.62079		4.92915	4.93326	5.31806	4.37409	3.72895	2.90873
10405280	Arl10	ADP-ribosylation factor-like 10	0	1.38	2.60268		7.00026	7.11202	6.82063	5.47218	5.67167	5.63909
10346562	Cflar	CASP8 and FADD-like apoptosis regulator	0	1.38	2.60268		8.1478	8.09366	8.22206	6.61008	6.90699	6.81081
10545697	Dguok	deoxyguanosine kinase	0	1.38	2.60268		8.50848	8.63845	8.43	7.15117	7.09735	7.19933
10459391	Fech	ferrochelatase	0	1.38	2.60268		9.24362	9.11238	9.1008	7.85583	7.79263	7.67934
10501199	Gstm7	glutathione S-transferase, mu 7	0	1.38	2.60268		11.8355	11.589	11.6793	10.4416	10.2394	10.2681
10467768	Loxl4	lysyl oxidase-like 4	0	1.38	2.60268		7.28814	6.93988	7.43906	6.01503	5.67309	5.83141
10573234	Lphn1	latrophilin 1	0	1.38	2.60268		9.6553	10.0022	9.73061	8.41875	8.42877	8.3911
10430794	Pmm1	phosphomannomutase 1	0	1.38	2.60268		9.22033	9.27159	9.02493	7.76572	7.85301	7.76309
10445898	Rab5a	RAB5A, member RAS oncogene family	0	1.38	2.60268		10.3664	10.2638	10.4072	9.07101	9.07649	8.7514
10545807	Spr	sepiapterin reductase	0	1.38	2.60268		8.90586	8.9001	8.88002	7.66777	7.40257	7.46348
10566366	Trim79	tripartite motif-containing 79	0	1.38	2.60268		6.19542	6.74145	6.65212	5.13006	5.04175	5.28691
10343739			0	1.38	2.60268		11.6844	11.6379	11.5872	10.4235	10.0272	10.305
10340971			0	1.38	2.60268		9.96846	9.90993	9.83557	8.60037	8.52796	8.44325
10501494			0	1.38	2.60268		5.25805	5.52123	5.15594	3.97672	4.09972	3.71998
10601846			0	1.38	2.60268		7.90659	7.81214	8.3785	6.64883	6.57089	6.72838
10339093			0	1.38	2.60268		9.7579	10.4454	9.78727	8.559	8.76343	8.54266
10343057			0.002	1.38	2.60268		5.28738	4.40191	4.97627	3.45305	3.67815	3.39337
10342013			0.016	1.38	2.60268		4.46239	5.82784	5.70422	3.64893	4.14189	4.05967
10428171	Ankrd46	ankyrin repeat domain 46	0	1.37	2.58471		9.32967	9.33348	9.36905	7.97336	8.04886	7.90662
10537834	Arhgef5	Rho guanine nucleotide exchange factor (GEF) 5	0	1.37	2.58471		7.74753	7.86941	7.78019	6.64701	6.37633	6.27288
10369844	Bicc1	bicaudal C homolog 1 (Drosophila)	0	1.37	2.58471		8.71876	8.88886	8.60437	7.41439	7.36594	7.33423
10464825	Ccs	copper chaperone for superoxide dismutase	0	1.37	2.58471		9.50297	9.52914	9.52794	7.99207	8.17175	8.28905
10516371	Eif2c1	eukaryotic translation initiation factor 2C, 1	0	1.37	2.58471		8.4728	8.55926	8.46448	7.14816	7.10812	7.13158
10415980	Fbxo16	F-box protein 16	0	1.37	2.58471		7.58561	7.55336	7.6584	6.269	6.12828	6.27824
10549382	Gm5887	predicted gene 5887	0	1.37	2.58471		7.65333	8.01009	7.68357	6.45945	6.17974	6.61259
10576692	Insr	insulin receptor	0	1.37	2.58471		9.46458	9.43553	9.61419	8.2259	8.09632	8.07399
10457273	Kif5b	kinesin family member 5B	0	1.37	2.58471		10.0812	10.1206	10.2302	8.80814	8.77837	8.73618
10474419	Lgr4	leucine-rich repeat-containing G protein-coupled receptor 4	0	1.37	2.58471		9.06915	8.92082	9.07851	7.647	7.6966	7.61578
10416215	Loxl2	lysyl oxidase-like 2	0	1.37	2.58471		7.32741	7.27295	7.68175	6.05962	5.92915	6.17726
10484318	Nckap1	NCK-associated protein 1	0	1.37	2.58471		11.3595	11.3196	11.4337	10.0175	10.011	9.96297
10491261	Sec62	SEC62 homolog (S. cerevisiae)	0	1.37	2.58471		10.3591	10.3987	10.4023	9.0656	9.01519	8.97898
10341948			0	1.37	2.58471		10.9633	11.0163	11.1405	9.6983	9.64293	9.67208
10504753			0	1.37	2.58471		6.58029	5.94339	6.25718	4.79173	4.98241	4.90169
10338763			0	1.37	2.58471		7.56986	7.72981	7.44929	6.40576	6.14448	6.08101
10339403			0	1.37	2.58471		4.53275	5.07778	5.48969	3.59817	3.55394	3.84025
10342524			0	1.37	2.58471		8.83518	8.51014	8.50571	7.47105	6.75882	7.50956
10338376			0.008	1.37	2.58471		5.58196	6.12755	6.2979	4.23555	4.98747	4.67138
10409265	Auh	AU RNA binding protein/enoyl-coenzyme A hydratase	0	1.36	2.56685		9.26042	8.93297	9.29877	7.49942	8.04017	7.87658
10488415	Cst3	cystatin C	0	1.36	2.56685		13.4581	13.4827	13.3954	12.0379	12.0212	12.2089
10540493	Edem1	ER degradation enhancer, mannosidase alpha-like 1	0	1.36	2.56685		9.41951	9.43021	9.52782	8.017	8.23746	8.05071
10364072	Ggt5	gamma-glutamyltransferase 5	0	1.36	2.56685		7.25956	7.51962	6.99027	5.89936	5.8621	5.92354
10501229	Gstm1	glutathione S-transferase, mu 1	0	1.36	2.56685		13.451	13.4548	13.3599	12.2194	12.0386	11.9377
10450682	H2-T23	histocompatibility 2, T region locus 23	0	1.36	2.56685		8.54201	8.55176	8.50192	7.16606	7.04815	7.30961
10454039	Impact	imprinted and ancient	0	1.36	2.56685		9.71111	9.82531	9.82907	8.32057	8.53176	8.44256
10603896	Klhl13	kelch-like 13 (Drosophila)	0	1.36	2.56685		7.38281	7.51525	7.39555	6.10136	5.93771	6.17675
10447437	Klraq1	KLRAQ motif containing 1	0	1.36	2.56685		9.06872	8.9819	9.06543	7.59999	7.7919	7.65812
10599962	Mamld1	mastermind-like domain containing 1	0	1.36	2.56685		8.99616	8.95849	9.04333	7.55594	7.5623	7.80101
10541741	Mlf2	myeloid leukemia factor 2	0	1.36	2.56685		10.592	10.5617	10.4934	9.26473	9.13068	9.17978
10533285	Ptpn11	protein tyrosine phosphatase, non-receptor type 11	0	1.36	2.56685		9.60998	9.74571	9.69867	8.24711	8.29184	8.43006
10398032	Serpina3b	serine (or cysteine) peptidase inhibitor, clade A, member 3B	0	1.36	2.56685		6.85948	6.7829	7.22981	5.79396	5.58276	5.42167
10607694	Syap1	synapse associated protein 1	0	1.36	2.56685		9.73351	9.64639	9.70395	8.30374	8.3742	8.31273
10410975	Zcchc9	zinc finger, CCHC domain containing 9	0	1.36	2.56685		8.68981	8.79933	8.78208	7.39285	7.41703	7.37951
10338730			0	1.36	2.56685		10.2807	10.5199	10.4316	9.00191	9.07747	9.07986
10342422			0.001	1.36	2.56685		4.98452	5.25958	4.8452	3.42254	3.79483	3.79003
10342202			0.002	1.36	2.56685		6.91861	7.61174	7.04543	5.87114	5.60571	6.0103
10344223			0.003	1.36	2.56685		7.9357	8.41481	8.0514	6.56917	7.34918	6.39451
10342066			0.005	1.36	2.56685		3.08599	4.35475	3.91155	2.74864	2.43205	2.08453
10341912			0.024	1.36	2.56685		5.37356	5.86456	5.60196	3.57988	5.14978	4.01945
10561527	Actn4	actinin alpha 4	0	1.35	2.54912		10.7165	10.6223	10.5798	9.2068	9.37819	9.28809
10392087	Ccdc47	coiled-coil domain containing 47	0	1.35	2.54912		10.3437	10.4153	10.3396	8.90475	9.13499	9.02043
10454786	Ctnna1	catenin (cadherin associated protein), alpha 1	0	1.35	2.54912		10.1575	10.0755	10.2143	8.81149	8.72781	8.85341
10449644	Glo1	glyoxalase 1	0	1.35	2.54912		9.47427	9.48882	9.65452	8.25287	8.27339	8.04259
10471675	Glo1	glyoxalase 1	0	1.35	2.54912		9.4754	9.4923	9.67239	8.23094	8.30406	8.04149
10479112	Gnas	GNAS (guanine nucleotide binding protein, alpha stimulating) complex locus	0	1.35	2.54912		9.56667	9.62382	9.54516	8.40104	8.11466	8.17714
10552075	Lgi4	leucine-rich repeat LGI family, member 4	0	1.35	2.54912		8.06144	8.00391	7.96314	6.82567	6.65524	6.48689
10440037	Nit2	nitrilase family, member 2	0	1.35	2.54912		8.66332	8.52339	8.5927	7.23838	7.22789	7.25111
10574488	Pdp2	pyruvate dehyrogenase phosphatase catalytic subunit 2	0	1.35	2.54912		7.3824	7.39984	7.53966	6.20315	5.84023	6.21368
10595466	Pgm3	phosphoglucomutase 3	0	1.35	2.54912		9.33127	9.38762	9.63571	8.05095	8.14278	8.11212
10546791	Sumf1	sulfatase modifying factor 1	0	1.35	2.54912		9.47535	9.44652	9.64832	7.89846	8.18182	8.42927
10511062	Tmem52	transmembrane protein 52	0	1.35	2.54912		9.24873	9.15004	9.13805	7.83899	7.83535	7.80048
10342567			0	1.35	2.54912		8.70829	8.73044	8.74865	7.41009	7.22788	7.50409
10339374			0	1.35	2.54912		10.3042	10.2091	10.2153	8.75121	9.13159	8.79326
10338565			0	1.35	2.54912		9.11949	9.33018	8.95763	7.61272	7.92079	7.83558
10343700			0.001	1.35	2.54912		6.63218	7.07399	6.57219	5.29866	5.52341	5.41836
10340983			0.007	1.35	2.54912		7.43302	7.83093	7.60963	6.75334	5.27206	6.80033
10604057	2011-09-06	septin 6	0	1.34	2.53151		9.9361	9.85187	10.0866	8.58182	8.61802	8.65889
10521222	Add1	adducin 1 (alpha)	0	1.34	2.53151		10.2731	10.4062	10.3505	9.04557	9.00046	8.97243
10598956	Araf	v-raf murine sarcoma 3611 viral oncogene homolog	0	1.34	2.53151		8.86869	8.84457	8.96425	7.40103	7.61918	7.64424
10482687	Arl5a	ADP-ribosylation factor-like 5A	0	1.34	2.53151		8.70111	8.6354	8.54035	7.21082	7.43512	7.20032
10496580	Gbp3	guanylate binding protein 3	0	1.34	2.53151		7.44348	7.66471	7.78105	6.19906	6.28236	6.38769
10382830	Gm11744	predicted gene 11744	0	1.34	2.53151		8.61743	8.56672	8.61373	7.22788	7.18133	7.36504
10604630	Mospd1	motile sperm domain containing 1	0	1.34	2.53151		9.71444	9.60246	9.5698	8.26523	8.37401	8.2292
10565634	Myo7a	myosin VIIA	0	1.34	2.53151		11.2482	11.0287	11.0624	9.81949	9.74997	9.75117
10450145	Psmb9	proteasome (prosome, macropain) subunit, beta type 9 (large multifunctional peptidase 2)	0	1.34	2.53151		8.39065	8.50143	8.59611	7.16831	6.91449	7.38647
10521830	Slc35a4	solute carrier family 35, member A4	0	1.34	2.53151		10.0617	10.1096	10.138	8.565	8.81008	8.92837
10441436	Snx9	sorting nexin 9	0	1.34	2.53151		9.1558	9.26308	9.11372	7.81503	7.93235	7.77323
10367224	Stat2	signal transducer and activator of transcription 2	0	1.34	2.53151		8.56197	8.47488	8.66541	7.24377	7.34648	7.09187
10456522	Tcf4	transcription factor 4	0	1.34	2.53151		9.68878	9.27602	9.46152	8.14501	8.19169	8.07348
10591960	Vps26b	vacuolar protein sorting 26 homolog B (yeast)	0	1.34	2.53151		9.53555	9.8403	9.55195	8.33803	8.33609	8.23366
10497300	Zfand1	zinc finger, AN1-type domain 1	0	1.34	2.53151		8.13568	8.23288	8.18478	6.75902	7.03483	6.74498
10561837	Zfp146	zinc finger protein 146	0	1.34	2.53151		9.04927	9.14471	9.24822	7.74607	7.78927	7.89588
10398751	Zfyve21	zinc finger, FYVE domain containing 21	0	1.34	2.53151		9.49002	9.29215	9.3183	7.95043	8.04716	8.08144
10580953			0	1.34	2.53151		7.11879	7.78404	7.49305	6.01023	6.2161	6.13885
10339817			0.001	1.34	2.53151		5.37993	6.15736	6.20044	4.1926	4.98009	4.53535
10459768			0.002	1.34	2.53151		9.18257	9.2727	10.3547	8.15681	8.15114	8.4684
10459604	4933403F05Rik	RIKEN cDNA 4933403F05 gene	0	1.33	2.51403		9.70971	9.66111	9.80045	8.48198	8.42927	8.27472
10470050	Abca2	ATP-binding cassette, sub-family A (ABC1), member 2	0	1.33	2.51403		8.83013	9.22487	8.84979	7.60485	7.66427	7.65878
10547386	Adipor2	adiponectin receptor 2	0	1.33	2.51403		10.3364	10.4444	10.5487	8.96712	9.13311	9.22471
10513608	Alad	aminolevulinate, delta-, dehydratase	0	1.33	2.51403		11.0821	11.129	11.053	9.75776	9.80215	9.71372
10485745	Ano3	anoctamin 3	0	1.33	2.51403		5.89973	5.92792	6.07088	4.57855	4.66097	4.67645
10426479	Ano6	anoctamin 6	0	1.33	2.51403		9.09047	9.28592	9.04067	7.86977	7.87004	7.68761
10396108	Arf6	ADP-ribosylation factor 6	0	1.33	2.51403		10.7384	11.3375	11.0778	9.73675	9.74065	9.68515
10471298	Bat2l	HLA-B associated transcript 2-like	0	1.33	2.51403		9.00917	9.38423	8.92708	7.83194	7.81298	7.69169
10495781	Bcar3	breast cancer anti-estrogen resistance 3	0	1.33	2.51403		8.96875	8.9857	9.02606	7.71385	7.64125	7.64788
10369290	Ddit4	DNA-damage-inducible transcript 4	0	1.33	2.51403		9.35981	9.07682	9.18553	7.96681	7.70896	7.9712
10461311	Eml3	echinoderm microtubule associated protein like 3	0	1.33	2.51403		7.98289	8.28626	8.16072	6.83107	6.83397	6.78877
10355403	Fn1	fibronectin 1	0	1.33	2.51403		9.48102	9.42778	9.08514	8.02076	7.88255	8.104
10436841	Il10rb	interleukin 10 receptor, beta	0	1.33	2.51403		9.54465	9.35611	9.53918	8.13631	8.17063	8.13849
10346310	Mobkl3	MOB1, Mps One Binder kinase activator-like 3 (yeast)	0	1.33	2.51403		9.67218	9.72793	9.98789	8.52328	8.46695	8.39371
10442643	Nme3	non-metastatic cells 3, protein expressed in	0	1.33	2.51403		8.1418	8.2088	8.1985	6.76055	6.77192	7.03222
10380551	Phb	prohibitin	0	1.33	2.51403		10.2412	10.0075	10.2218	8.64069	8.7757	9.07603
10380815	Psmb3	proteasome (prosome, macropain) subunit, beta type 3	0	1.33	2.51403		10.9597	10.953	10.9043	9.61709	9.61324	9.59494
10502419	Rap1gds1	RAP1, GTP-GDP dissociation stimulator 1	0	1.33	2.51403		8.14676	8.19941	8.17232	6.926	6.79423	6.79984
10573867	Rbl2	retinoblastoma-like 2	0	1.33	2.51403		9.76444	9.66379	9.5262	8.29693	8.31613	8.35473
10396511	Syne2	synaptic nuclear envelope 2	0	1.33	2.51403		10.4613	10.3042	10.14	9.02845	8.98283	8.91357
10395320	Twist1	twist homolog 1 (Drosophila)	0	1.33	2.51403		7.97263	7.96224	7.84329	6.52021	6.43376	6.82515
10405539	Txndc15	thioredoxin domain containing 15	0	1.33	2.51403		9.26552	9.24674	9.27371	7.86108	7.91554	8.0094
10569767	Zfp358	zinc finger protein 358	0	1.33	2.51403		8.27845	8.41339	8.05632	7.03757	6.93018	6.78863
10338585			0	1.33	2.51403		12.9308	13.1133	13.012	11.7139	11.5451	11.7948
10338472			0	1.33	2.51403		12.8214	12.8696	12.8962	11.429	11.4545	11.7084
10342261			0	1.33	2.51403		12.9416	13.0624	13.0723	11.7056	11.5367	11.8353
10340094			0	1.33	2.51403		10.6729	10.6509	10.697	9.35336	9.11097	9.55969
10343404			0	1.33	2.51403		11.1213	10.9434	11.0995	9.67722	9.91873	9.58241
10338147			0	1.33	2.51403		10.7928	11.4177	10.9724	9.64148	9.91961	9.64467
10342622			0	1.33	2.51403		5.29955	5.81033	5.21688	3.91651	3.92711	4.49634
10341216			0.004	1.33	2.51403		4.85669	4.66935	4.53715	3.0383	3.10505	3.91998
10343814			0.01	1.33	2.51403		3.66182	4.66132	4.09658	2.94604	2.38808	3.10791
10342271			0.021	1.33	2.51403		5.04385	5.64545	4.35228	2.95582	3.87191	4.2383
10601581	9230105E10Rik	RIKEN cDNA 9230105E10 gene	0	1.32	2.49666		7.20822	7.32466	7.16862	5.79584	5.96959	5.97403
10605797	Arhgef9	CDC42 guanine nucleotide exchange factor (GEF) 9	0	1.32	2.49666		6.90163	7.09906	6.71059	5.49973	5.71869	5.54684
10381697	Hexim1	hexamethylene bis-acetamide inducible 1	0	1.32	2.49666		8.93701	9.06842	8.85374	7.58198	7.7974	7.52723
10599781	Htatsf1	HIV TAT specific factor 1	0	1.32	2.49666		9.47109	9.59433	9.58224	8.20474	8.32146	8.17371
10387525	Mpdu1	mannose-P-dolichol utilization defect 1	0	1.32	2.49666		10.3413	10.2396	10.3542	8.90201	8.96724	9.09709
10423293	Myo10	myosin X	0	1.32	2.49666		10.3441	10.4929	10.3692	9.12922	9.06933	9.0378
10415030	Oxa1l	oxidase assembly 1-like	0	1.32	2.49666		10.2757	10.1995	10.3423	8.92814	8.87031	9.06343
10434052	P2rx6	purinergic receptor P2X, ligand-gated ion channel, 6	0	1.32	2.49666		7.77986	7.65026	7.84786	6.44813	6.57973	6.27926
10384824	Prdxdd1	PrdX-deacylase domain 1	0	1.32	2.49666		8.0575	8.07715	8.22085	6.72141	6.7137	6.94561
10349724	Rab7l1	RAB7, member RAS oncogene family-like 1	0	1.32	2.49666		7.59394	7.73386	7.71601	6.36996	6.29129	6.43005
10581395	Slc12a4	solute carrier family 12, member 4	0	1.32	2.49666		8.55689	8.77931	8.63829	7.21976	7.32631	7.47734
10566326	Trim12	tripartite motif-containing 12	0	1.32	2.49666		7.69175	7.60832	7.84387	6.36366	6.64495	6.16915
10342442			0	1.32	2.49666		11.2033	11.0934	11.1871	9.88611	9.86642	9.78088
10342502			0	1.32	2.49666		10.4781	10.5492	10.3006	9.21959	9.17935	8.9779
10339062			0	1.32	2.49666		11.1077	11.05	11.2445	9.78771	9.86516	9.77605
10342682			0.009	1.32	2.49666		4.73881	4.6412	5.08116	3.68609	3.90487	2.91072
10419082	5730469M10Rik	RIKEN cDNA 5730469M10 gene	0	1.31	2.47942		12.3698	12.4614	12.3706	11.0746	11.1479	11.0535
10417869	Anxa7	annexin A7	0	1.31	2.47942		8.42538	8.5053	8.4674	7.13138	7.20897	7.1147
10344895	Gm7560	predicted gene 7560	0	1.31	2.47942		7.3992	7.19894	7.33477	6.10721	5.81936	6.08476
10597477	Gpd1l	glycerol-3-phosphate dehydrogenase 1-like	0	1.31	2.47942		8.39437	8.44881	8.39166	7.16356	7.07386	7.06041
10386951	Hs3st3b1	heparan sulfate (glucosamine) 3-O-sulfotransferase 3B1	0	1.31	2.47942		8.08988	8.16888	8.06842	6.87051	6.7242	6.78827
10461108	Iscu	IscU iron-sulfur cluster scaffold homolog (E. coli)	0	1.31	2.47942		11.1264	10.9771	11.0473	9.80242	9.75221	9.66804
10503098	Lyn	Yamaguchi sarcoma viral (v-yes-1) oncogene homolog	0	1.31	2.47942		7.23005	7.18471	7.24269	6.10907	5.45582	6.16573
10406434	Mef2c	myocyte enhancer factor 2C	0	1.31	2.47942		8.38942	8.08478	8.42762	7.11068	7.01489	6.85918
10475890	Mertk	c-mer proto-oncogene tyrosine kinase	0	1.31	2.47942		9.35233	9.01475	9.11595	8.00494	7.78457	7.77057
10391963	Nsf	N-ethylmaleimide sensitive fusion protein	0	1.31	2.47942		9.60926	9.57083	9.65201	8.25684	8.3225	8.33404
10367746	Sash1	SAM and SH3 domain containing 1	0	1.31	2.47942		9.15362	8.94217	8.87826	7.7082	7.72051	7.61526
10464529	Tcirg1	T-cell, immune regulator 1, ATPase, H+ transporting, lysosomal V0 protein A3	0	1.31	2.47942		8.28804	8.17603	8.32088	6.8624	7.05658	6.9461
10378568			0	1.31	2.47942		7.93087	7.99326	7.71538	6.33308	6.57766	6.79257
10538890			0	1.31	2.47942		6.77239	6.1263	6.53437	5.14799	5.32985	5.03101
10339344			0.002	1.31	2.47942		4.65241	5.68351	5.67815	4.12161	3.91152	4.0562
10342220			0.016	1.31	2.47942		4.40368	3.7832	3.30684	2.56669	2.42736	2.5746
10342010			0.023	1.31	2.47942		5.40533	5.78598	5.70662	3.82388	5.42718	3.70365
10341457			0.026	1.31	2.47942		4.06084	5.16963	4.35911	3.41847	3.12195	3.10791
10460255	1700055N04Rik	RIKEN cDNA 1700055N04 gene	0	1.3	2.46229		11.038	10.961	10.8547	9.85618	9.74458	9.36382
10368041	3110003A17Rik	RIKEN cDNA 3110003A17 gene	0	1.3	2.46229		8.33891	8.40813	8.65448	7.38195	7.06717	7.0531
10596465	Acy1	aminoacylase 1	0	1.3	2.46229		7.79549	7.52783	7.40734	6.26147	6.4363	6.14677
10582231	Fbxo31	F-box protein 31	0	1.3	2.46229		8.84784	9.04941	8.94277	7.56114	7.69684	7.68861
10414431	Gapdh	glyceraldehyde-3-phosphate dehydrogenase	0	1.3	2.46229		12.0134	11.8559	11.9539	10.7078	10.6405	10.5604
10496592	Gbp2	guanylate binding protein 2	0	1.3	2.46229		6.63895	6.93888	7.34514	5.45887	5.80427	5.77233
10374453	Glul	glutamate-ammonia ligase (glutamine synthetase)	0	1.3	2.46229		12.9848	13.0372	12.9552	11.6802	11.7047	11.7033
10364385	Ilvbl	ilvB (bacterial acetolactate synthase)-like	0	1.3	2.46229		8.60015	8.59442	8.66977	7.29378	7.21188	7.47096
10524417	Iscu	IscU iron-sulfur cluster scaffold homolog (E. coli)	0	1.3	2.46229		11.1664	10.9632	11.0637	9.80416	9.83417	9.64327
10590031	Itga9	integrin alpha 9	0	1.3	2.46229		8.2597	8.6733	8.25261	6.98418	7.12217	7.17962
10462363	Jak2	Janus kinase 2	0	1.3	2.46229		8.3617	8.50331	8.41965	7.16613	7.12087	7.11152
10514466	Jun	Jun oncogene	0	1.3	2.46229		8.47777	8.65747	8.45012	7.29329	7.22728	7.15009
10394158	Kif3c	kinesin family member 3C	0	1.3	2.46229		8.0335	8.22584	7.97409	6.69854	6.79155	6.83389
10541484	M6pr	mannose-6-phosphate receptor, cation dependent	0	1.3	2.46229		10.8215	10.7496	10.8671	9.55274	9.50309	9.49327
10598771	Maoa	monoamine oxidase A	0	1.3	2.46229		7.66505	7.81018	7.9382	6.46969	6.58663	6.4562
10595480	Me1	malic enzyme 1, NADP(+)-dependent, cytosolic	0	1.3	2.46229		13.2047	13.159	13.2421	11.9461	11.8849	11.8867
10386185	Olfr331	olfactory receptor 331	0	1.3	2.46229		7.65791	7.53742	7.67471	6.34287	6.24601	6.38373
10404447	Serpinb1b	serine (or cysteine) peptidase inhibitor, clade B, member 1b	0	1.3	2.46229		6.19112	6.33412	6.39939	5.08679	5.00602	4.94367
10521205	Sh3bp2	SH3-domain binding protein 2	0	1.3	2.46229		8.28176	8.45539	8.12625	6.97343	7.13402	6.8572
10501593	Slc30a7	solute carrier family 30 (zinc transporter), member 7	0	1.3	2.46229		9.26071	9.39334	9.43598	7.95931	8.16009	8.06331
10478928	Tshz2	teashirt zinc finger family member 2	0	1.3	2.46229		8.28142	8.53144	8.22643	7.04897	7.08034	7.00333
10488029	Zfand1	zinc finger, AN1-type domain 1	0	1.3	2.46229		8.05566	8.11912	8.0705	6.74727	6.91165	6.67374
10600150	Zfp275	zinc finger protein 275	0	1.3	2.46229		8.96734	8.78967	8.76016	7.52943	7.56976	7.51053
10342949			0	1.3	2.46229		10.4035	10.4565	10.6174	9.15362	9.27077	9.14427
10604337			0	1.3	2.46229		9.5774	9.53792	9.35639	8.21506	8.03707	8.33448
10343598			0.001	1.3	2.46229		7.90994	8.63828	8.37901	6.92155	7.28945	6.8271
10342529			0.005	1.3	2.46229		6.42263	6.58828	6.31561	5.22969	5.47235	4.73631
10339844			0.03	1.3	2.46229		5.45479	5.44574	5.19528	3.48311	4.86989	3.82966
10341654			0.033	1.3	2.46229		6.44471	6.52761	6.78545	4.82358	6.09079	4.95101
10501699	Agl	amylo-1,6-glucosidase, 4-alpha-glucanotransferase	0	1.29	2.44528		8.96852	9.16792	9.10409	7.80208	7.82424	7.73356
10497920	Ankrd50	ankyrin repeat domain 50	0	1.29	2.44528		9.02634	9.07984	8.84169	7.64469	7.72686	7.71801
10451004	Cd2ap	CD2-associated protein	0	1.29	2.44528		10.3388	10.5301	10.3108	9.05512	9.14978	9.09625
10553092	Dbp	D site albumin promoter binding protein	0.002	1.29	2.44528		8.60895	9.452	8.57826	7.44344	7.98269	7.32832
10447591	Ftl2	ferritin light chain 2	0	1.29	2.44528		10.87	10.7063	10.5284	9.32708	9.39509	9.49985
10490203	Gnas	GNAS (guanine nucleotide binding protein, alpha stimulating) complex locus	0	1.29	2.44528		7.80903	7.71626	7.79609	6.5029	6.34454	6.60109
10603387	Hdac6	histone deacetylase 6	0	1.29	2.44528		10.9073	10.9352	11.0068	9.64323	9.7186	9.61917
10415319	Irf9	interferon regulatory factor 9	0	1.29	2.44528		8.00877	7.85847	7.75809	6.62302	6.4558	6.67084
10433940	Mapk1	mitogen-activated protein kinase 1	0	1.29	2.44528		11.0479	11.0798	11.152	9.83264	9.81164	9.77996
10506254	Raver2	ribonucleoprotein, PTB-binding 2	0	1.29	2.44528		7.91705	7.93275	7.79505	6.60792	6.60534	6.5567
10371877	Slc25a3	solute carrier family 25 (mitochondrial carrier, phosphate carrier), member 3	0	1.29	2.44528		11.3639	11.4577	11.501	10.1315	10.0556	10.2617
10356269	Sp140	Sp140 nuclear body protein	0	1.29	2.44528		6.71122	6.78162	6.29479	5.26205	5.09928	5.54574
10340460			0	1.29	2.44528		10.197	10.3119	10.6176	9.01196	9.16055	9.08371
10341845			0	1.29	2.44528		9.87659	9.9367	9.71321	8.51179	8.64003	8.49248
10343768			0	1.29	2.44528		5.71837	5.41701	5.18082	4.33395	4.12752	3.97722
10563295	Ftl1	ferritin light chain 1	0	1.28	2.42839		11.0603	10.8394	10.6735	9.59872	9.56898	9.5575
10417371	Gm2897	predicted gene 2897	0.001	1.28	2.42839		7.12215	7.54047	7.58306	5.83502	6.4378	6.12596
10512640	Gne	glucosamine	0	1.28	2.42839		8.79151	8.86971	8.83933	7.64837	7.52529	7.50034
10427293	Hoxc6	homeobox C6	0	1.28	2.42839		7.4391	7.78214	7.53726	6.51411	6.03062	6.37423
10531370	Naaa	N-acylethanolamine acid amidase	0	1.28	2.42839		8.81495	8.87998	8.84708	7.53427	7.62852	7.53858
10354494	Nab1	Ngfi-A binding protein 1	0	1.28	2.42839		9.09352	8.98443	9.13144	7.75291	7.806	7.8048
10482517	Nmi	N-myc (and STAT) interactor	0	1.28	2.42839		7.75521	7.85415	7.84376	6.65976	6.3805	6.58362
10422776	Phb	prohibitin	0	1.28	2.42839		10.2677	10.0149	10.2496	8.73139	8.84704	9.12235
10553413	Prmt3	protein arginine N-methyltransferase 3	0	1.28	2.42839		8.95628	9.01328	9.17536	7.7722	7.725	7.80129
10495054	Rhoc	ras homolog gene family, member C	0	1.28	2.42839		8.16533	8.29954	8.11549	7.09663	6.90576	6.72714
10533122	Sdsl	serine dehydratase-like	0	1.28	2.42839		8.28771	8.30627	8.46171	7.0967	6.93775	7.17074
10438262	Slc25a1	solute carrier family 25 (mitochondrial carrier, citrate transporter), member 1	0	1.28	2.42839		11.061	10.7965	10.8979	9.63128	9.67092	9.60596
10406203	Stoml2	stomatin (Epb7.2)-like 2	0	1.28	2.42839		10.2292	9.87618	10.1503	8.72833	8.72004	8.95335
10565437	Tmem135	transmembrane protein 135	0	1.28	2.42839		9.01526	8.77891	9.20137	7.72756	7.74467	7.6862
10389816	Tom1l1	target of myb1-like 1 (chicken)	0	1.28	2.42839		9.033	8.85054	8.96139	7.63986	7.6565	7.70771
10359181	Tor3a	torsin family 3, member A	0	1.28	2.42839		7.51843	7.52735	7.5487	6.18838	6.26059	6.31777
10460057	Tshz1	teashirt zinc finger family member 1	0	1.28	2.42839		8.42718	8.49977	8.39649	7.14784	7.08333	7.23833
10362672			0	1.28	2.42839		8.982	8.57729	8.62625	7.55978	7.33106	7.45523
10340131			0	1.28	2.42839		9.60293	8.93392	9.45037	8.07363	8.00337	8.07025
10338339			0	1.28	2.42839		11.4417	10.681	11.1426	9.85145	9.79464	9.76883
10342680			0.001	1.28	2.42839		6.98483	7.44917	6.62877	5.82262	5.88118	5.53305
10411899	2410002O22Rik	RIKEN cDNA 2410002O22 gene	0	1.27	2.41162		9.48257	9.38768	9.62836	8.26545	8.1839	8.23792
10545974	Antxr1	anthrax toxin receptor 1	0	1.27	2.41162		7.35566	7.40775	7.29835	6.21527	5.79085	6.24906
10407291	Arl15	ADP-ribosylation factor-like 15	0	1.27	2.41162		8.48373	8.55427	8.6892	7.38351	7.17626	7.36038
10511136	B930041F14Rik	RIKEN cDNA B930041F14 gene	0	1.27	2.41162		8.21363	8.32691	8.17193	6.90548	7.00388	6.99764
10548105	Ccnd2	cyclin D2	0	1.27	2.41162		9.16148	9.32805	9.31917	7.98003	7.97187	8.05706
10445574	Cul7	cullin 7	0	1.27	2.41162		8.51595	8.7683	8.48121	7.18591	7.25668	7.49817
10604633	Cxx1b	CAAX box 1 homolog B (human)	0	1.27	2.41162		9.05925	9.03438	9.14208	7.667	7.79932	7.949
10600485	Dkc1	dyskeratosis congenita 1, dyskerin homolog (human)	0	1.27	2.41162		7.92895	7.74704	7.96854	6.62075	6.59157	6.62416
10366705	Gm9081	predicted gene 9081	0	1.27	2.41162		10.2912	10.0652	10.1657	9.05311	8.73283	8.92574
10497421	Hps3	Hermansky-Pudlak syndrome 3 homolog (human)	0	1.27	2.41162		8.77731	8.80371	8.8879	7.49301	7.66883	7.51053
10507520	Hyi	hydroxypyruvate isomerase homolog (E. coli)	0	1.27	2.41162		8.52577	8.3902	8.29202	7.15456	7.25372	6.98924
10464551	Ndufs8	NADH dehydrogenase (ubiquinone) Fe-S protein 8	0	1.27	2.41162		10.2459	9.96441	10.0332	8.82303	8.69818	8.90093
10401519	Npc2	Niemann Pick type C2	0	1.27	2.41162		9.88686	9.87898	9.90735	8.64759	8.54903	8.6781
10370376	Pfkl	phosphofructokinase, liver, B-type	0	1.27	2.41162		9.24462	9.11864	9.35097	7.83557	7.99801	8.06736
10574976	Pla2g15	phospholipase A2, group XV	0	1.27	2.41162		8.50391	8.44813	8.41448	7.18841	7.16459	7.1916
10363430	Psap	prosaposin	0	1.27	2.41162		12.9459	13.0718	13.0321	11.8105	11.6215	11.7951
10396476	Rhoj	ras homolog gene family, member J	0	1.27	2.41162		7.84096	7.9667	7.79369	6.8408	6.49141	6.46724
10494023	Rorc	RAR-related orphan receptor gamma	0	1.27	2.41162		7.88983	7.7497	7.6961	6.82375	6.25984	6.43508
10505747	Rraga	Ras-related GTP binding A	0	1.27	2.41162		9.65282	9.92494	9.84017	8.58224	8.51686	8.52245
10511269	Sdf4	stromal cell derived factor 4	0	1.27	2.41162		10.2914	10.3731	10.2841	9.01354	9.12005	9.01338
10493519	Shc1	src homology 2 domain-containing transforming protein C1	0	1.27	2.41162		8.79497	8.86236	8.8166	7.49031	7.5938	7.59104
10356333	Snord82	small nucleolar RNA, C/D box 82	0.001	1.27	2.41162		6.17783	5.51576	5.77406	4.50958	4.4871	4.65658
10478469	Svs5	seminal vesicle secretory protein 5	0	1.27	2.41162		7.91362	7.71355	8.07221	6.65699	6.73795	6.50712
10427772	Tars	threonyl-tRNA synthetase	0	1.27	2.41162		8.56308	8.74247	8.94708	7.49433	7.5307	7.41296
10405488	Tmed9	transmembrane emp24 protein transport domain containing 9	0	1.27	2.41162		8.89577	8.9856	8.99525	7.63516	7.6183	7.82409
10368566	Tpd52l1	tumor protein D52-like 1	0	1.27	2.41162		9.29992	9.28	9.3527	8.1229	7.96827	8.04228
10607317	Tsr2	TSR2, 20S rRNA accumulation, homolog (S. cerevisiae)	0	1.27	2.41162		8.48139	8.44558	8.68547	7.18187	7.29801	7.31682
10338138			0	1.27	2.41162		9.85068	9.72894	9.8082	8.65778	8.65057	8.26169
10545014			0	1.27	2.41162		7.28266	7.27578	7.22014	5.8938	6.00434	6.05819
10342728			0	1.27	2.41162		10.4637	10.4917	10.4597	9.10947	9.15193	9.32958
10340878			0	1.27	2.41162		6.56142	6.75254	6.17212	5.10029	5.14808	5.42019
10339614			0.002	1.27	2.41162		6.25474	6.41455	5.93994	5.02222	5.24315	4.52074
10341230			0.014	1.27	2.41162		6.73541	7.79729	6.96045	5.62779	6.29908	5.76118
10351504			0.028	1.27	2.41162		9.81593	10.0058	9.36622	8.95503	8.62861	7.78857
10579296	2810428I15Rik	RIKEN cDNA 2810428I15 gene	0	1.26	2.39496		8.51283	8.44679	8.39051	7.00026	7.22066	7.35526
10400030	Bzw2	basic leucine zipper and W2 domains 2	0	1.26	2.39496		8.08056	8.13818	8.13945	6.85874	6.71068	6.99565
10346551	Cflar	CASP8 and FADD-like apoptosis regulator	0	1.26	2.39496		8.0523	7.95197	8.0819	6.75009	6.77874	6.76795
10373367	Coq10a	coenzyme Q10 homolog A (yeast)	0	1.26	2.39496		8.77061	9.08441	8.99028	7.51779	7.75056	7.80799
10497381	Cyp7b1	cytochrome P450, family 7, subfamily b, polypeptide 1	0	1.26	2.39496		6.69874	6.67437	6.77644	5.39791	5.35896	5.61671
10406198	Ftl2	ferritin light chain 2	0	1.26	2.39496		10.9563	10.7427	10.5761	9.51663	9.46869	9.51379
10502776	Lphn2	latrophilin 2	0	1.26	2.39496		8.26217	8.18445	8.3097	6.93959	7.04816	6.9851
10561806	Mif	macrophage migration inhibitory factor	0	1.26	2.39496		11.2048	11.0246	11.1309	9.9443	9.88479	9.75282
10535927	Nme2	non-metastatic cells 2, protein (NM23B) expressed in	0	1.26	2.39496		10.0252	10.3372	10.0453	8.7232	8.89498	9.00656
10476443	Plcb4	phospholipase C, beta 4	0	1.26	2.39496		9.83429	9.96532	9.85018	8.66485	8.66519	8.55055
10594053	Pml	promyelocytic leukemia	0	1.26	2.39496		8.10466	8.42979	8.26602	7.01063	6.92548	7.09336
10360090	Ppox	protoporphyrinogen oxidase	0	1.26	2.39496		8.05558	8.27296	8.21207	6.96123	6.94505	6.84214
10452556	Rab12	RAB12, member RAS oncogene family	0	1.26	2.39496		9.65893	9.30807	9.47951	8.34469	8.19315	8.11479
10495252	Romo1	reactive oxygen species modulator 1	0	1.26	2.39496		8.46818	8.53285	8.5143	7.0994	7.00479	7.62034
10508961	Slc30a2	solute carrier family 30 (zinc transporter), member 2	0	1.26	2.39496		9.80059	9.89914	9.86786	8.57689	8.6067	8.60634
10529052	Slc5a6	solute carrier family 5 (sodium-dependent vitamin transporter), member 6	0	1.26	2.39496		8.12901	8.2337	7.90795	6.62952	6.90158	6.97046
10401781	Sptlc2	serine palmitoyltransferase, long chain base subunit 2	0	1.26	2.39496		9.94782	10.148	10.2051	8.85501	8.85791	8.79433
10346191	Stat1	signal transducer and activator of transcription 1	0	1.26	2.39496		9.51927	9.52462	9.86902	8.28969	8.50248	8.34117
10475247	Tmem62	transmembrane protein 62	0	1.26	2.39496		8.44653	8.16261	8.59429	7.09254	7.15158	7.17617
10370833	Uqcr11	ubiquinol-cytochrome c reductase, complex III subunit XI	0	1.26	2.39496		9.28698	9.13267	9.06953	7.8974	7.92465	7.87727
10343092			0	1.26	2.39496		4.43604	4.32781	4.79352	2.94066	3.58204	3.24194
10338185			0.003	1.26	2.39496		6.16484	6.73804	6.34007	5.00579	5.36024	5.10324
10339371			0.01	1.26	2.39496		4.34288	5.11011	4.11744	3.62027	3.1907	2.96851
10502417	2410002F23Rik	RIKEN cDNA 2410002F23 gene	0	1.25	2.37841		9.2198	9.13856	9.25243	7.95679	8.05997	7.84698
10367221	Apof	apolipoprotein F	0	1.25	2.37841		6.58321	6.88998	6.65876	5.42479	5.64114	5.3214
10373407	Esyt1	extended synaptotagmin-like protein 1	0	1.25	2.37841		7.83713	8.04414	7.89348	6.74767	6.61142	6.67871
10444895	Flot1	flotillin 1	0	1.25	2.37841		8.8401	8.91608	9.01919	7.72624	7.56898	7.7216
10508069	Ftl2	ferritin light chain 2	0	1.25	2.37841		10.8489	10.6116	10.4674	9.41767	9.37073	9.3873
10603508	Ftsj1	FtsJ homolog 1 (E. coli)	0	1.25	2.37841		8.44921	8.49371	8.45786	7.11773	7.23771	7.28587
10360884	Iars2	isoleucine-tRNA synthetase 2, mitochondrial	0	1.25	2.37841		9.706	9.58035	9.75501	8.54922	8.33146	8.41224
10602644	Kdm5c	lysine (K)-specific demethylase 5C	0	1.25	2.37841		9.18152	9.28425	9.20987	7.94426	8.0871	7.90234
10502780	Lphn2	latrophilin 2	0	1.25	2.37841		8.30414	8.27432	8.55578	7.11776	7.13027	7.14768
10405753	Me1	malic enzyme 1, NADP(+)-dependent, cytosolic	0	1.25	2.37841		13.1799	13.1481	13.1878	11.9362	11.9038	11.9254
10370021	Mif	macrophage migration inhibitory factor	0	1.25	2.37841		11.1102	10.9041	11.0345	9.85945	9.80747	9.64616
10489377	Serinc3	serine incorporator 3	0	1.25	2.37841		13.4828	13.5577	13.4853	12.1735	12.1829	12.4055
10373202	Shmt2	serine hydroxymethyltransferase 2 (mitochondrial)	0	1.25	2.37841		8.52672	8.44557	8.5908	7.20563	7.39117	7.20453
10566767	St5	suppression of tumorigenicity 5	0	1.25	2.37841		9.40562	9.41356	9.37408	8.17384	8.18712	8.06758
10428103	Stk3	serine/threonine kinase 3 (Ste20, yeast homolog)	0	1.25	2.37841		9.21259	9.25953	9.2996	8.04305	8.02051	7.96935
10452508	Twsg1	twisted gastrulation homolog 1 (Drosophila)	0	1.25	2.37841		9.58426	9.70061	9.61036	8.42902	8.30937	8.40193
10389581	Ypel2	yippee-like 2 (Drosophila)	0	1.25	2.37841		7.89915	7.68556	7.65845	6.4926	6.4756	6.51013
10599321	Zbtb33	zinc finger and BTB domain containing 33	0	1.25	2.37841		8.1216	8.35963	8.38064	6.95429	6.88855	7.26307
10541094	Zfp637	zinc finger protein 637	0	1.25	2.37841		8.12362	8.16821	8.08568	6.88045	6.70381	7.03081
10413185	Zmiz1	zinc finger, MIZ-type containing 1	0.001	1.25	2.37841		7.93126	8.87475	8.26666	7.15834	7.14991	6.99954
10338567			0	1.25	2.37841		10.8654	10.6682	10.9693	9.56974	9.53128	9.63713
10339984			0	1.25	2.37841		9.24552	9.32611	9.64787	7.9669	8.16476	8.33539
10340511			0	1.25	2.37841		10.3073	10.1701	10.3481	8.98161	8.91625	9.16829
10344216			0	1.25	2.37841		8.71508	8.92855	9.1432	7.5098	7.52006	8.0107
10340634			0	1.25	2.37841		4.80351	4.95175	4.74915	3.3015	3.89207	3.57043
10343307			0.002	1.25	2.37841		7.05738	7.5077	7.36315	5.86664	5.83451	6.46451
10341398			0.006	1.25	2.37841		6.56867	6.04382	5.30209	4.48382	4.95175	4.71665
10344286			0.01	1.25	2.37841		4.39192	4.9745	4.59135	3.85944	3.39668	2.95791
10552252	1600014C10Rik	RIKEN cDNA 1600014C10 gene	0	1.24	2.36199		8.13047	8.14061	8.06363	6.86127	6.98435	6.75543
10512939	2610030H06Rik	RIKEN cDNA 2610030H06 gene	0	1.24	2.36199		8.63017	8.65465	8.88298	7.3849	7.43445	7.64197
10606056	2610030H06Rik	RIKEN cDNA 2610030H06 gene	0	1.24	2.36199		8.63017	8.65465	8.88298	7.3849	7.43445	7.64197
10501143	Ahcyl1	S-adenosylhomocysteine hydrolase-like 1	0	1.24	2.36199		11.5749	11.5853	11.5967	10.2663	10.352	10.4328
10434528	Chrd	chordin	0	1.24	2.36199		7.71608	7.76694	7.66978	6.32291	6.55683	6.55935
10515164	Cmpk1	cytidine monophosphate (UMP-CMP) kinase 1	0	1.24	2.36199		10.0357	9.96131	10.0039	8.64274	8.7749	8.86386
10529273	Ctbp1	C-terminal binding protein 1	0	1.24	2.36199		10.1724	10.1178	10.1777	8.88825	8.94231	8.92147
10578448	Cyp4v3	cytochrome P450, family 4, subfamily v, polypeptide 3	0	1.24	2.36199		7.74499	8.00004	7.96243	6.50862	6.6318	6.84469
10407955	Epdr1	ependymin related protein 1 (zebrafish)	0	1.24	2.36199		7.24187	6.99363	6.97391	5.79988	5.84567	5.85222
10394593	Fam49a	family with sequence similarity 49, member A	0	1.24	2.36199		7.1907	6.6434	7.10949	5.91225	5.56933	5.73935
10474239	Gapdh	glyceraldehyde-3-phosphate dehydrogenase	0	1.24	2.36199		12.0567	11.8931	11.9622	10.7692	10.6824	10.7441
10590972	Gm16379	predicted pseudogene 16379	0	1.24	2.36199		11.6908	11.4924	11.6089	10.4274	10.4093	10.2354
10432006	Hdac7	histone deacetylase 7	0	1.24	2.36199		8.46778	8.4413	8.20926	7.14921	6.99109	7.25218
10473880	Lrp4	low density lipoprotein receptor-related protein 4	0	1.24	2.36199		7.59699	7.7878	7.72561	6.5021	6.43063	6.45743
10453436	Mcfd2	multiple coagulation factor deficiency 2	0	1.24	2.36199		9.23485	9.31209	9.26534	7.98748	8.09715	8.01301
10582310	Mvd	mevalonate (diphospho) decarboxylase	0.005	1.24	2.36199		8.6881	8.31131	8.97947	7.40759	7.41218	7.42725
10587792	Plscr1	phospholipid scramblase 1	0	1.24	2.36199		7.77657	7.76427	7.77547	6.49786	6.64004	6.4604
10461568	Prpf19	PRP19/PSO4 pre-mRNA processing factor 19 homolog (S. cerevisiae)	0	1.24	2.36199		10.2461	10.2906	10.3137	9.01445	9.07146	9.04439
10435383	Ptplb	protein tyrosine phosphatase-like (proline instead of catalytic arginine), member b	0	1.24	2.36199		10.1348	10.0183	10.2549	8.82519	8.93527	8.91958
10515493	Rhoa	ras homolog gene family, member A	0	1.24	2.36199		11.5439	11.7272	11.6218	10.3978	10.3122	10.4542
10588893	Rhoa	ras homolog gene family, member A	0	1.24	2.36199		11.3608	11.681	11.439	10.182	10.1868	10.3876
10493990	S100a11	S100 calcium binding protein A11 (calgizzarin)	0	1.24	2.36199		9.62668	9.60431	9.53158	8.37951	8.30428	8.37136
10422518	Tmtc4	transmembrane and tetratricopeptide repeat containing 4	0	1.24	2.36199		8.93359	9.09259	9.15152	7.87906	7.65389	7.92972
10523206	Uso1	USO1 homolog, vesicle docking protein (yeast)	0	1.24	2.36199		10.1426	10.0793	10.2742	8.96862	8.86185	8.93092
10342646			0	1.24	2.36199		10.516	10.3057	10.7161	9.35461	9.19595	9.28055
10441811			0	1.24	2.36199		8.04589	8.19241	8.01873	6.81621	6.91632	6.81451
10340683			0.008	1.24	2.36199		5.08549	6.54678	5.9032	4.76573	4.1296	4.90776
10339278			0.009	1.24	2.36199		5.85605	5.99263	5.16431	4.53172	4.86474	3.88156
10342388			0.011	1.24	2.36199		4.85901	5.15471	4.20234	3.50394	3.30942	3.67584
10410959	Atg10	autophagy-related 10 (yeast)	0	1.23	2.34567		7.64855	7.72668	7.78371	6.56183	6.67068	6.24929
10455970	BC023105	cDNA sequence BC023105	0	1.23	2.34567		3.99956	4.46644	4.48326	2.88316	3.47388	2.91166
10419261	Bmp4	bone morphogenetic protein 4	0	1.23	2.34567		7.64414	7.67416	7.67783	6.36827	6.4683	6.48105
10381226	Coasy	Coenzyme A synthase	0	1.23	2.34567		8.8051	8.77354	8.76825	7.57269	7.58198	7.49354
10424825	Cyc1	cytochrome c-1	0	1.23	2.34567		10.7343	10.6285	10.7173	9.30948	9.43813	9.6489
10348889	D2hgdh	D-2-hydroxyglutarate dehydrogenase	0	1.23	2.34567		8.57912	8.59955	8.58187	7.50708	7.27675	7.28792
10476648	Dstn	destrin	0	1.23	2.34567		10.6267	10.6544	10.7839	9.54039	9.33163	9.49022
10488806	Eif2s2	eukaryotic translation initiation factor 2, subunit 2 (beta)	0	1.23	2.34567		9.74331	9.88659	9.89952	8.5364	8.58166	8.71912
10425903	Gapdh	glyceraldehyde-3-phosphate dehydrogenase	0	1.23	2.34567		12.0398	11.8591	11.9777	10.7897	10.722	10.687
10497441	Gyg	glycogenin	0	1.23	2.34567		7.53842	7.6969	7.62466	6.39537	6.42124	6.35908
10418747	Hacl1	2-hydroxyacyl-CoA lyase 1	0	1.23	2.34567		10.2674	10.1065	10.2687	8.9665	9.0159	8.96021
10605055	Haus7	HAUS augmin-like complex, subunit 7	0	1.23	2.34567		9.37389	9.31712	9.42691	8.05969	8.15355	8.21407
10368025	Hspa8	heat shock protein 8	0	1.23	2.34567		12.3936	12.451	12.5229	11.2738	11.2117	11.1935
10536472	Mdfic	MyoD family inhibitor domain containing	0	1.23	2.34567		8.28319	8.50368	8.43281	6.96825	7.35027	7.22284
10415052	Mmp14	matrix metallopeptidase 14 (membrane-inserted)	0	1.23	2.34567		9.72106	9.83608	9.85027	8.56446	8.58439	8.55893
10594519	Ostb	organic solute transporter beta	0	1.23	2.34567		7.56152	7.35162	7.65124	6.16271	6.28242	6.42217
10388718	Pipox	pipecolic acid oxidase	0	1.23	2.34567		7.4701	7.30132	7.37743	6.12268	6.15992	6.17313
10434643	Psmb3	proteasome (prosome, macropain) subunit, beta type 3	0	1.23	2.34567		10.3801	10.2603	10.3843	9.02801	9.06993	9.24706
10457640	S100a11	S100 calcium binding protein A11 (calgizzarin)	0	1.23	2.34567		9.61892	9.57064	9.53031	8.42923	8.25048	8.34887
10410625	Sdha	succinate dehydrogenase complex, subunit A, flavoprotein (Fp)	0	1.23	2.34567		12.2167	12.1702	12.2817	10.9251	11.0126	11.0433
10589076	Slc25a20	solute carrier family 25 (mitochondrial carnitine/acylcarnitine translocase), member 20	0	1.23	2.34567		11.0669	10.9078	11.0742	9.73013	9.80724	9.81159
10410078	Slc35d2	solute carrier family 35, member D2	0	1.23	2.34567		7.00999	6.52071	6.62433	5.22608	5.75685	5.49694
10544171	Slc37a3	solute carrier family 37 (glycerol-3-phosphate transporter), member 3	0	1.23	2.34567		9.20439	9.38348	9.42066	8.00959	8.20942	8.10689
10422396	Stk24	serine/threonine kinase 24 (STE20 homolog, yeast)	0	1.23	2.34567		9.88047	9.78594	9.74506	8.60882	8.56124	8.5589
10540911	Tsen2	tRNA splicing endonuclease 2 homolog (S. cerevisiae)	0	1.23	2.34567		7.0239	6.89524	7.08407	5.72365	5.79046	5.79403
10344160			0	1.23	2.34567		10.9261	10.8648	10.976	9.73263	9.71073	9.64537
10341048			0	1.23	2.34567		9.89909	9.60665	9.77846	8.43231	8.56706	8.58225
10342369			0	1.23	2.34567		10.3477	10.5804	10.3631	9.18691	9.04725	9.37335
10342911			0	1.23	2.34567		9.78526	10.1171	9.89412	8.58237	8.71321	8.82291
10340817			0	1.23	2.34567		4.94998	5.28229	4.5884	3.75412	3.76603	3.59935
10344058			0.001	1.23	2.34567		8.93164	9.49913	9.4551	8.05469	8.34418	7.80288
10338512			0.004	1.23	2.34567		5.9107	6.30891	6.3559	4.41957	5.00956	5.45107
10342148			0.015	1.23	2.34567		6.27144	6.76797	6.43021	5.44874	4.92575	5.41668
10339886			0.029	1.23	2.34567		4.45445	5.55661	5.0834	4.74113	2.89708	3.77957
10467470	Aldh18a1	aldehyde dehydrogenase 18 family, member A1	0	1.22	2.32947		8.54322	8.6876	8.74699	7.47312	7.41843	7.41474
10525397	Arpc3	actin related protein 2/3 complex, subunit 3	0	1.22	2.32947		8.78272	8.62326	8.73392	7.50997	7.50377	7.45261
10496813	Ctbs	chitobiase, di-N-acetyl-	0	1.22	2.32947		7.66064	7.78293	7.80105	6.65277	6.34701	6.58707
10447602	Ezr	ezrin	0	1.22	2.32947		8.91271	8.93168	9.03839	7.79936	7.77892	7.64651
10450103	H2-Ke6	H2-K region expressed gene 6	0	1.22	2.32947		8.81679	8.74658	8.73344	7.59517	7.4948	7.55471
10455656	Hsd17b4	hydroxysteroid (17-beta) dehydrogenase 4	0	1.22	2.32947		10.9684	10.981	11.0827	9.73827	9.76979	9.87141
10584578	Hspa8	heat shock protein 8	0.001	1.22	2.32947		7.1334	6.87649	6.97123	5.84138	5.96758	5.51277
10524034	Idua	iduronidase, alpha-L-	0	1.22	2.32947		8.09828	7.98097	8.03879	6.77004	6.94122	6.75336
10605831	Las1l	LAS1-like (S. cerevisiae)	0	1.22	2.32947		8.29962	8.38861	8.33478	7.08191	7.16644	7.11489
10604687	Mmgt1	membrane magnesium transporter 1	0	1.22	2.32947		8.16907	8.03294	8.07127	6.8666	6.86137	6.88416
10406865	Mrps27	mitochondrial ribosomal protein S27	0	1.22	2.32947		8.49731	8.4473	8.54049	7.23586	7.30056	7.27674
10506415	Oma1	OMA1 homolog, zinc metallopeptidase (S. cerevisiae)	0	1.22	2.32947		7.97838	8.01286	8.31681	6.76207	6.89429	7.00647
10401900	Sel1l	sel-1 suppressor of lin-12-like (C. elegans)	0	1.22	2.32947		10.9132	10.9669	11.021	9.72071	9.79977	9.71048
10448459	Tbc1d24	TBC1 domain family, member 24	0	1.22	2.32947		8.22735	8.35252	8.27301	6.96589	7.21317	7.01708
10601326	Uprt	uracil phosphoribosyltransferase (FUR1) homolog (S. cerevisiae)	0	1.22	2.32947		8.13787	7.95911	8.20651	6.782	7.02197	6.8486
10374035	Xbp1	X-box binding protein 1	0	1.22	2.32947		9.38495	9.40596	9.39952	8.24368	8.10682	8.18545
10341637			0	1.22	2.32947		13.1567	13.1192	13.1506	11.9893	11.7871	11.9957
10579767			0	1.22	2.32947		7.91215	8.03801	7.82639	6.81328	6.60571	6.69488
10342568			0	1.22	2.32947		11.6707	11.7958	11.5575	10.4665	10.5112	10.3953
10338196			0	1.22	2.32947		11.5104	11.3311	11.5552	10.232	10.2539	10.254
10494445			0	1.22	2.32947		9.32181	9.50716	9.2376	8.14139	8.19342	8.05789
10342892			0	1.22	2.32947		8.93461	8.95617	9.11074	7.64195	7.72297	7.98287
10342938			0	1.22	2.32947		10.355	10.131	10.2399	9.04832	9.1773	8.82928
10340140			0	1.22	2.32947		10.5616	11.2425	10.8644	9.69294	9.66504	9.63816
10339861			0.008	1.22	2.32947		8.46373	9.35389	8.60674	7.35534	7.85297	7.55754
10339238			0.021	1.22	2.32947		6.38369	6.19132	5.08408	4.26612	5.30386	4.42927
10523281	2011-09-11	septin 11	0	1.21	2.31338		8.75142	8.96536	8.81082	7.55929	7.73733	7.59186
10555235	Arrb1	arrestin, beta 1	0	1.21	2.31338		9.18932	9.32847	9.23906	7.99178	8.13336	7.9921
10443021	Atp6v0e	ATPase, H+ transporting, lysosomal V0 subunit E	0	1.21	2.31338		10.6746	10.6246	10.8048	9.4388	9.49154	9.54754
10557560	Cdipt	CDP-diacylglycerol--inositol 3-phosphatidyltransferase (phosphatidylinositol synthase)	0	1.21	2.31338		9.94945	9.89762	10.0344	8.67162	8.73815	8.83785
10436392	Cpox	coproporphyrinogen oxidase	0	1.21	2.31338		8.55297	8.73777	8.42164	7.27154	7.44594	7.35108
10360443	Fh1	fumarate hydratase 1	0	1.21	2.31338		10.6123	10.5487	10.6297	9.43077	9.39468	9.33325
10606436	Hmgn5	high-mobility group nucleosome binding domain 5	0	1.21	2.31338		8.45729	8.58824	8.85775	7.23279	7.45103	7.60223
10493177	Mef2d	myocyte enhancer factor 2D	0	1.21	2.31338		9.52531	9.81309	9.44364	8.4089	8.31892	8.41417
10599576	Ppdpf	pancreatic progenitor cell differentiation and proliferation factor homolog (zebrafish)RIKEN cDNA 2700038C09 gene	0	1.21	2.31338		9.47819	9.31341	9.37158	8.20738	8.04983	8.26757
10562663	Rps4x	ribosomal protein S4, X-linked	0	1.21	2.31338		9.67172	9.53922	9.4182	8.2538	8.33943	8.40918
10472933	Scrn3	secernin 3	0	1.21	2.31338		7.91406	8.0259	8.10893	6.66301	6.95582	6.78576
10521950	Stim2	stromal interaction molecule 2	0	1.21	2.31338		9.30124	9.34927	9.3567	8.00905	8.18532	8.19058
10416940			0	1.21	2.31338		11.6599	11.7061	11.7189	10.3783	10.5113	10.554
10338802			0	1.21	2.31338		11.8884	11.8356	11.8057	10.5959	10.5728	10.7192
10342436			0	1.21	2.31338		11.2653	11.013	11.3195	9.97393	9.96818	10.0348
10340768			0	1.21	2.31338		6.8109	7.06835	6.95726	5.43772	5.86747	5.90626
10343983			0.005	1.21	2.31338		5.06652	5.56496	5.45012	3.86352	4.68786	3.90306
10338621			0.01	1.21	2.31338		4.32013	3.99899	4.36059	2.94572	3.40953	2.69165
10344026			0.012	1.21	2.31338		5.72009	6.04606	6.05498	4.57076	4.12281	5.49239
10422942			0.021	1.21	2.31338		4.32071	3.97188	4.37778	3.04812	3.21323	2.77137
10364601	Abca7	ATP-binding cassette, sub-family A (ABC1), member 7	0	1.2	2.2974		7.79469	7.79422	7.7554	6.52321	6.69005	6.54522
10601473	Apool	apolipoprotein O-like	0	1.2	2.2974		7.4644	7.44436	7.70581	6.43382	6.29089	6.27893
10362922	Atg5	autophagy-related 5 (yeast)	0	1.2	2.2974		8.45902	8.38528	8.39385	7.18366	7.10571	7.36338
10560816	Atp5g2	ATP synthase, H+ transporting, mitochondrial F0 complex, subunit C2 (subunit 9)	0	1.2	2.2974		11.0419	10.936	10.9221	9.63659	9.7232	9.95122
10499160	Cd1d1	CD1d1 antigen	0	1.2	2.2974		7.16968	7.01465	7.18763	6.29703	5.7382	5.74296
10423498	Dap	death-associated protein	0	1.2	2.2974		10.7436	10.7599	10.6685	9.56607	9.55912	9.44439
10482432	Gapdh	glyceraldehyde-3-phosphate dehydrogenase	0	1.2	2.2974		12.7107	12.5831	12.6586	11.4143	11.5404	11.4099
10351738	Pex19	peroxisomal biogenesis factor 19	0	1.2	2.2974		10.0445	9.80952	9.92289	8.72957	8.7431	8.7041
10562576	Plekhf1	pleckstrin homology domain containing, family F (with FYVE domain) member 1	0	1.2	2.2974		8.21144	8.04197	8.15749	7.01379	6.93549	6.87223
10501762	Snx7	sorting nexin 7	0	1.2	2.2974		8.73697	8.61262	8.93401	7.52344	7.57928	7.57186
10436783	Sod1	superoxide dismutase 1, soluble	0	1.2	2.2974		12.3178	12.3339	12.3848	10.9322	11.1264	11.3694
10509601	Tmco4	transmembrane and coiled-coil domains 4	0	1.2	2.2974		8.48695	8.56827	8.57489	7.40189	7.2304	7.40888
10536429	Tmem106b	transmembrane protein 106B	0	1.2	2.2974		9.91476	9.99872	9.95419	8.78048	8.7372	8.75618
10473432	Tnks1bp1	tankyrase 1 binding protein 1	0	1.2	2.2974		8.22936	8.47721	8.19761	7.00875	7.30348	6.99348
10596207	Uba5	ubiquitin-like modifier activating enzyme 5	0	1.2	2.2974		9.43396	9.35098	9.52149	8.19137	8.21194	8.30752
10498160	Ufm1	ubiquitin-fold modifier 1	0	1.2	2.2974		9.57032	9.47838	9.63234	8.30671	8.4721	8.3127
10364984	Zbtb7a	zinc finger and BTB domain containing 7a	0	1.2	2.2974		7.81442	8.05512	7.79953	6.65504	6.64413	6.77224
10339787			0	1.2	2.2974		13.0504	13.1104	13.1357	11.9303	11.9142	11.8556
10346321			0	1.2	2.2974		5.58976	5.77546	5.86326	4.55878	4.5769	4.49258
10341553			0	1.2	2.2974		8.25927	8.30283	8.02529	7.07056	6.89191	7.02846
10339153			0	1.2	2.2974		10.9939	11.0084	11.1546	9.84541	9.94951	9.77489
10359849			0	1.2	2.2974		7.43699	7.8188	7.55244	6.33202	6.31889	6.55327
10342219			0	1.2	2.2974		9.94035	9.96233	9.70283	8.6658	8.96957	8.37838
10339931			0	1.2	2.2974		9.2497	9.86674	9.44378	8.36345	8.51813	8.08435
10340578			0.001	1.2	2.2974		5.54514	6.14825	5.69163	4.13878	4.8636	4.77854
10339639			0.001	1.2	2.2974		7.28796	7.76495	7.67499	6.16787	6.31432	6.65978
10338104			0.002	1.2	2.2974		8.40663	8.94663	9.0402	7.50094	7.43956	7.84032
10341680			0.02	1.2	2.2974		4.71797	5.79492	4.74146	3.32176	3.98106	4.34521
10362115	1110021L09Rik	RIKEN cDNA 1110021L09 gene	0	1.19	2.28153		7.71082	7.75599	7.75332	6.53718	6.39596	6.70449
10596857	Apeh	acylpeptide hydrolase	0	1.19	2.28153		8.99684	9.011	9.08608	7.7313	7.89409	7.88369
10537849	Arhgef5	Rho guanine nucleotide exchange factor (GEF) 5	0	1.19	2.28153		7.25089	7.38589	7.32605	6.29796	6.01249	6.09053
10447566	Atp5g2	ATP synthase, H+ transporting, mitochondrial F0 complex, subunit C2 (subunit 9)	0	1.19	2.28153		10.9806	10.8767	10.8553	9.58356	9.66721	9.90353
10549276	Bhlhe41	basic helix-loop-helix family, member e41	0.001	1.19	2.28153		7.37443	8.2307	7.17235	6.42055	6.42223	6.36231
10346564	Casp8	caspase 8	0	1.19	2.28153		7.63845	7.70078	7.79333	6.42294	6.58558	6.56264
10438530	Clcn2	chloride channel 2	0	1.19	2.28153		9.6403	9.74426	9.69285	8.43252	8.64214	8.41822
10562500	Dpy19l3	dpy-19-like 3 (C. elegans)	0	1.19	2.28153		8.33824	8.53119	8.47272	7.18603	7.31713	7.26297
10589756	Epm2aip1	EPM2A (laforin) interacting protein 1	0	1.19	2.28153		8.47626	8.45484	8.4967	7.32991	7.37962	7.14728
10471018	Fam73b	family with sequence similarity 73, member B	0	1.19	2.28153		8.95766	8.91046	8.97634	7.84545	7.67149	7.74985
10368612	Gapdh	glyceraldehyde-3-phosphate dehydrogenase	0	1.19	2.28153		12.6966	12.5504	12.641	11.4963	11.4271	11.4
10366667	Gns	glucosamine (N-acetyl)-6-sulfatase	0	1.19	2.28153		10.3644	10.479	10.2235	9.24689	9.15553	9.0808
10528021	Hspa8	heat shock protein 8	0	1.19	2.28153		12.4144	12.4759	12.542	11.313	11.2382	11.299
10502772	Lphn2	latrophilin 2	0	1.19	2.28153		7.05115	6.89596	7.07978	6.2894	5.64478	5.53316
10559436	Mboat7	membrane bound O-acyltransferase domain containing 7	0	1.19	2.28153		8.55012	8.72878	8.69243	7.48244	7.38862	7.51816
10407307	Mocs2	molybdenum cofactor synthesis 2	0	1.19	2.28153		8.57942	8.5874	8.78082	7.41781	7.52083	7.43815
10429641	Naprt1	nicotinate phosphoribosyltransferase domain containing 1	0	1.19	2.28153		7.95078	7.9052	7.82035	6.70849	6.75718	6.63567
10351491	Olfml2b	olfactomedin-like 2B	0	1.19	2.28153		8.77149	8.80641	8.86727	7.61299	7.72081	7.54346
10580010	Pkn1	protein kinase N1	0	1.19	2.28153		9.0383	9.21469	9.03355	7.94149	7.90593	7.87925
10405427	Prelid1	PRELI domain containing 1	0	1.19	2.28153		11.0438	10.9881	11.1172	10.0199	9.80993	9.74378
10362941	Prep	prolyl endopeptidase	0	1.19	2.28153		9.53401	9.32726	9.72655	8.40445	8.22523	8.38493
10608721	Sts	steroid sulfatase	0	1.19	2.28153		9.50888	9.61497	9.38025	8.38438	8.189	8.3587
10457489	6030446N20Rik	RIKEN cDNA 6030446N20 gene	0	1.18	2.26577		8.03612	8.09237	8.17065	6.85375	6.84922	7.05853
10589800	Clasp2	CLIP associating protein 2	0	1.18	2.26577		9.76965	9.82148	9.75161	8.63061	8.67444	8.51264
10479902	Dhtkd1	dehydrogenase E1 and transketolase domain containing 1	0	1.18	2.26577		8.50138	8.59167	8.39833	7.29593	7.38829	7.27402
10501235	Gstm4	glutathione S-transferase, mu 4	0	1.18	2.26577		10.0117	9.74094	9.79092	8.68202	8.60096	8.72322
10588691	Hyal1	hyaluronoglucosaminidase 1	0	1.18	2.26577		7.10552	7.07836	7.02676	6.10307	5.77083	5.8043
10448094	Lnpep	leucyl/cystinyl aminopeptidase	0	1.18	2.26577		10.0396	10.2653	10.101	9.00292	9.02621	8.83728
10425078	Mpst	mercaptopyruvate sulfurtransferase	0	1.18	2.26577		7.49399	7.48491	7.45854	6.20934	6.29743	6.37602
10598236	Nudt11	nudix (nucleoside diphosphate linked moiety X)-type motif 11	0.001	1.18	2.26577		7.30536	7.30554	7.43497	6.23154	5.92891	6.34089
10449163	Pigq	phosphatidylinositol glycan anchor biosynthesis, class Q	0	1.18	2.26577		8.92434	9.01389	8.81024	7.66588	7.68393	7.85407
10396671	Plekhg3	pleckstrin homology domain containing, family G (with RhoGef domain) member 3	0	1.18	2.26577		7.90593	7.86449	7.63897	6.83266	6.61512	6.43054
10487906	Slc23a2	solute carrier family 23 (nucleobase transporters), member 2	0.002	1.18	2.26577		8.68227	8.72231	8.89361	7.55024	7.53414	7.67278
10438189	Slc7a4	solute carrier family 7 (cationic amino acid transporter, y+ system), member 4	0	1.18	2.26577		10.0185	10.0881	10.2176	8.84525	8.90144	9.05203
10601659	Srpx2	sushi-repeat-containing protein, X-linked 2	0	1.18	2.26577		6.85574	7.31754	7.08268	5.97199	5.85322	5.87799
10440099	St3gal6	ST3 beta-galactoside alpha-2,3-sialyltransferase 6	0	1.18	2.26577		9.0295	9.10906	9.03288	7.87633	7.88746	7.85402
10422028	Tbc1d4	TBC1 domain family, member 4	0	1.18	2.26577		7.81129	8.08346	7.57895	6.62959	6.68421	6.6142
10339426			0	1.18	2.26577		10.3116	10.5849	10.7631	9.25719	9.52196	9.33139
10338764			0.001	1.18	2.26577		7.62655	7.58801	8.14468	6.38298	6.94925	6.47334
10338798			0.03	1.18	2.26577		5.41287	5.37894	5.07835	3.3182	4.91462	4.09567
10342498			0.039	1.18	2.26577		5.31975	5.06534	3.97241	3.76698	2.97901	4.07427
10566346	9230105E10Rik	RIKEN cDNA 9230105E10 gene	0.001	1.17	2.25012		6.57328	6.20854	6.31115	5.25714	4.7239	5.60332
10453629	9430020K01Rik	RIKEN cDNA 9430020K01 gene	0	1.17	2.25012		10.8623	11.1414	10.7596	9.78952	9.77997	9.67313
10393836	Arhgdia	Rho GDP dissociation inhibitor (GDI) alpha	0	1.17	2.25012		10.5662	10.6233	10.5338	9.42271	9.46758	9.32212
10454580	Bin1	bridging integrator 1	0	1.17	2.25012		8.37041	8.50173	8.33544	7.15566	7.18039	7.35452
10467859	Cox15	COX15 homolog, cytochrome c oxidase assembly protein (yeast)	0	1.17	2.25012		9.13811	9.04159	9.15559	7.80575	8.00524	8.0195
10600403	Fam50a	family with sequence similarity 50, member A	0	1.17	2.25012		7.6962	7.94904	7.76161	6.65723	6.54657	6.69531
10554817	Gapdh	glyceraldehyde-3-phosphate dehydrogenase	0	1.17	2.25012		12.5874	12.4357	12.5102	11.3368	11.3974	11.2958
10384552	Gapdh	glyceraldehyde-3-phosphate dehydrogenase	0	1.17	2.25012		13.0182	12.8913	12.9903	11.8883	11.746	11.7609
10523354	Gapdh	glyceraldehyde-3-phosphate dehydrogenase	0	1.17	2.25012		13.0182	12.8913	12.9903	11.8883	11.746	11.7609
10532027	Gapdh	glyceraldehyde-3-phosphate dehydrogenase	0	1.17	2.25012		13.0182	12.8913	12.9903	11.8883	11.746	11.7609
10544906	Ggct	gamma-glutamyl cyclotransferase	0	1.17	2.25012		8.35339	8.38445	8.65616	7.39602	7.16958	7.31489
10373325	Gpr182	G protein-coupled receptor 182	0	1.17	2.25012		7.1411	7.18295	6.81122	6.06355	5.67889	5.87857
10592816	Hmbs	hydroxymethylbilane synthase	0	1.17	2.25012		9.50384	9.40082	9.55827	8.40737	8.36388	8.17678
10602501	Huwe1	HECT, UBA and WWE domain containing 1	0	1.17	2.25012		10.0803	10.4469	10.1957	9.09712	9.10783	8.99714
10597354	Pdcd6ip	programmed cell death 6 interacting protein	0	1.17	2.25012		10.7478	10.9133	10.802	9.67135	9.62393	9.65606
10584615	Pvrl1	poliovirus receptor-related 1	0	1.17	2.25012		8.20743	8.43401	8.17919	7.34576	6.82238	7.13527
10535471	Rac1	RAS-related C3 botulinum substrate 1	0	1.17	2.25012		10.6792	10.7285	10.6187	9.51029	9.45185	9.54622
10450206	Rnf5	ring finger protein 5	0	1.17	2.25012		9.63134	9.63207	9.65778	8.28846	8.48832	8.63401
10477808	Romo1	reactive oxygen species modulator 1	0	1.17	2.25012		10.2122	10.2215	10.2042	9.01173	8.93829	9.16638
10584334	Siae	sialic acid acetylesterase	0	1.17	2.25012		9.93752	9.92023	10.1298	8.70988	8.9196	8.86177
10384539	Slc1a4	solute carrier family 1 (glutamate/neutral amino acid transporter), member 4	0.003	1.17	2.25012		7.23733	7.68685	7.72872	6.36186	6.39057	6.38822
10426467	Tmem117	transmembrane protein 117	0	1.17	2.25012		7.45524	7.54089	7.75318	6.58106	6.47572	6.1947
10463661	Trim8	tripartite motif-containing 8	0	1.17	2.25012		8.07264	8.09483	7.75224	6.90932	6.91155	6.59711
10388971	Utp6	UTP6, small subunit (SSU) processome component, homolog (yeast)	0	1.17	2.25012		8.56844	8.67118	8.77064	7.45887	7.48636	7.54583
10546233	Vmn1r43	vomeronasal 1 receptor 43	0.014	1.17	2.25012		6.50292	7.54652	7.28172	5.63322	6.10095	6.08439
10394119	Zfp750	zinc finger protein 750	0	1.17	2.25012		7.01932	7.12817	7.31488	6.15143	6.0619	5.7295
10340291			0	1.17	2.25012		8.55916	8.74324	8.76935	7.52506	7.64365	7.39294
10344323			0	1.17	2.25012		11.2877	11.2348	11.3529	10.071	10.189	10.1162
10341427			0	1.17	2.25012		10.5384	10.4254	10.6296	9.29832	9.37688	9.40028
[truncated: 627 more rows]
