# Supplementary material for: RiboTag Analysis of Actively Translated mRNAs in Sertoli and Leydig Cells In Vivo
Source: PLoS One. 2013 Jun 11;8(6):e66179. doi: 10.1371/journal.pone.0066179 (PMC3679032; doi:10.1371/journal.pone.0066179)
Supplement: Table S5 — Gene ontology analysis of Leydig cell-specific or highly enriched transcripts. Transcripts that showed an enrichment (IP/I) ratio of 7 fold or higher in IPs from Cyp17iCre: RiboTag mouse testes were analyzed. GO categories with an AdjP value <0.01 are listed. (DOCX) [file pone.0066179.s013.docx]

| | **Gene ontology analysis of Leydig cell-specific or highly enriched transcripts**   | *Molecular function* | *Genes* | *AdjP* | | --- | --- | --- | | **Electron carrier activity** | 8 | 6.02E-05 | | **Catalitic activity** | 81 | 2.92E-13 | | **Oxidoreductase activity** | 36 | 6.32E-18 | | *Oxidoreductase activity, acting on the CH-CH group of donnors* | 6 | 9.79E-05 | | *Oxidoreductase activity, acting on the aldehyde or oxo group of donnors* | 4 | 2.40E-03 | | *Oxidoreductase activity, acting on the CH-OH group of donnors* | 9 | 1.60E-05 | | Oxidoreductase activity, acting on the CH-OH group of donnors, NAD or NADPH as acceptor | 7 | 4.00E-04 | | *Steroid dehydrogenase activity* | 4 | 8.00E-04 | | Steroid dehydrogenase activity, acting on the CH-OH group od donnors, NAD or NADPH as acceptor | 4 | 4.00E-04 | | **Binding** |  |  | | **Steroid binding** | 4 | 5.10E-03 | | **Cofactor binding** | 9 | 5.00E-04 | | *Coenzyme binding* | 8 | 4.00E-04 |  | *Biological process* | *Genes* | *AdjP* | | --- | --- | --- | | **Regulation of hormone levels** | 8 | 8.00E-04 | | **Hormone metabolic process** | 7 | 3.00E-04 | | *Cellular hormone metabolic process* | 7 | 2.93E-05 | | **Metabolic process** | 86 | 1.20E-05 | | **Oxidation/Reduction** | 34 | 1.17E-15 | | **Lipid metabolic process** | 30 | 1.16E-11 | | *Cellular lipid metabolic process* | 29 | 2.05E-12 | | Isoprenoid metabolic process | 4 | 5.40E-03 | | Fatty acid metabolic process | 11 | 2.85E-05 | | Steroid metabolic process | 14 | 1.01E-08 | | Steroid biosynthetic process | 9 | 8.82E-07 | | Sterol metabolic process | 7 | 2.00E-04 | | Cholesterol metabolic process | 7 | 8.41E-05 | | **Alcohol metabolic process** | 11 | 1.90E-03 | | **Cellular ketone metabolic process** | 19 | 9.30E-07 | | **Organic acid metabolic process** | 19 | 8.26E-07 | | *Oxoacid metabolic process* | 19 | 8.26E-07 | | Carboxylic acid metabolic process | 19 | 8.26E-07 | | Monocarboxylic acid metabolic process | 15 | 8.26E-07 | |  |  | | --- | --- | --- | --- | --- | --- | --- | --- | --- | --- | --- | --- | --- | --- | --- | --- | --- | --- | --- | --- | --- | --- | --- | --- | --- | --- | --- | --- | --- | --- | --- | --- | --- | --- | --- | --- | --- | --- | --- | --- | --- | --- | --- | --- | --- | --- | --- | --- | --- | --- | --- | --- | --- | --- | --- | --- | --- | --- | --- | --- | --- | --- | --- | --- | --- | --- | --- | --- | --- | --- | --- | --- | --- | --- | --- | --- | --- | --- | --- | --- | --- | --- | --- | --- | --- | --- | --- | --- | --- | --- | --- | --- | --- | --- | --- | --- | --- | --- | --- | --- | --- | --- | --- | --- | --- | |  |  |  | |  |  |  | |  |  |  | |  |  |  | |  |  |  | |  |  |  | |  |  |  | |  |  |  | |  |  |  | |  |  |  | |  |  |  | |  |  |
| --- | --- | --- | --- | --- | --- | --- | --- | --- | --- | --- | --- | --- | --- | --- | --- | --- | --- | --- | --- | --- | --- | --- | --- | --- | --- | --- | --- | --- | --- | --- | --- | --- | --- | --- | --- | --- | --- | --- | --- | --- | --- | --- | --- | --- | --- | --- | --- | --- | --- | --- | --- | --- | --- | --- | --- | --- | --- | --- | --- | --- | --- | --- | --- | --- | --- | --- | --- | --- | --- | --- | --- | --- | --- | --- | --- | --- | --- | --- | --- | --- | --- | --- | --- | --- | --- | --- | --- | --- | --- | --- | --- | --- | --- | --- | --- | --- | --- | --- | --- | --- | --- | --- | --- | --- | --- | --- | --- | --- | --- | --- | --- | --- | --- | --- | --- | --- | --- | --- | --- | --- | --- | --- | --- | --- | --- | --- | --- | --- | --- | --- | --- | --- | --- | --- | --- | --- | --- | --- | --- | --- |
|  |  |  |
|  |  |  |
